# Supplementary material for: Insights into the evolution of Archaea and eukaryotic protein modifier systems revealed by the genome of a novel archaeal group
Source: PubMed Central journal article supplement — Nucleic Acids Res. 2010 Dec 15;39(8):3204–23. doi: 10.1093/nar/gkq1228 (PMC3082918; doi:10.1093/nar/gkq1228), 2010-12-15
Supplement: supp_gkq1228_Supplementary_Fig.pdf [file supp_gkq1228_Supplementary_Fig.pdf]

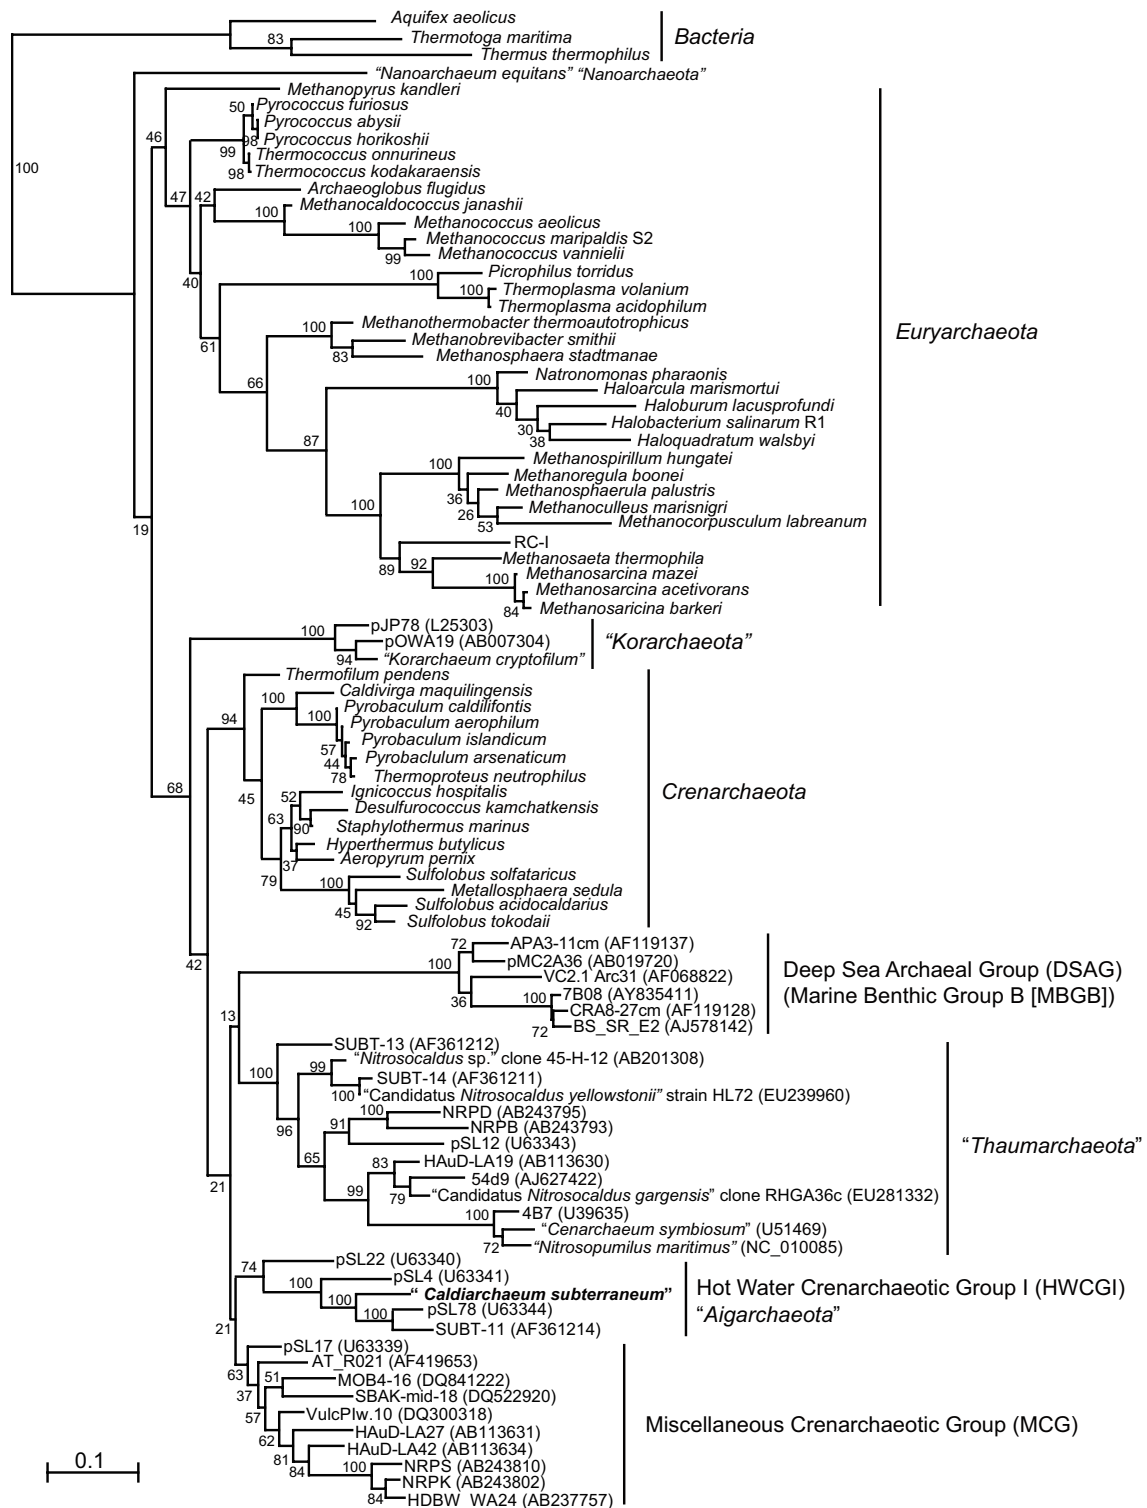

Fig. S1. Maximum likelihood phylogenetic tree of SSU rRNA gene including *C. subterraneum* and environmental sequences in crenarchaeal lineages using 1020 identical nucleotide positions. Bacterial sequences were used as out-group. Numbers indicate bootstrap values from 100 replications. Accession numbers of GenBank/EMBL/DDBJ were given in parentheses. Bar, 1 substitution per 10 nucleotides.
