# Supplementary material for: Insights into the evolution of Archaea and eukaryotic protein modifier systems revealed by the genome of a novel archaeal group
Source: PubMed Central journal article supplement — Nucleic Acids Res. 2010 Dec 15;39(8):3204–23. doi: 10.1093/nar/gkq1228 (PMC3082918; doi:10.1093/nar/gkq1228), 2010-12-15
Supplement: supp_gkq1228_Table_S1.pdf [file supp_gkq1228_Table_S1.pdf]

Table S1. Predicted RNA and protein coding genes (CDSs) in the composite genome of *C. subterraneum*.

| Gene ID          | Strand | Start  | End    | Product                                                                          | COG category | Protein size (aa) | arCOG No.  | COG No. |
|------------------|--------|--------|--------|----------------------------------------------------------------------------------|--------------|-------------------|------------|---------|
| CDS CSUB_C0001   | +      | 62     | 1252   | archaeal cell division control protein orc1/cdc6                                 | L            | 396               | arCOG00467 | COG1474 |
| CDS CSUB_C0002   | -      | 1236   | 2465   | replication factor C large subunit                                               | L            | 409               | arCOG00470 | COG0470 |
| CDS CSUB_C0003   | -      | 2462   | 3445   | replication factor C small subunit                                               | L            | 327               | arCOG00469 | COG0470 |
| CDS CSUB_C0004   | -      | 3468   | 4202   | TatD DNase family protein                                                        | L            | 244               | arCOG00891 | COG0084 |
| CDS CSUB_C0005   | +      | 4177   | 4542   | hypothetical protein                                                             | S            | 121               |            |         |
| CDS CSUB_C0006   | +      | 4545   | 5204   | conserved hypothetical protein                                                   | R            | 219               | arCOG00497 | COG2220 |
| CDS CSUB_C0007   | +      | 5210   | 5662   | hypothetical protein                                                             | S            | 150               |            |         |
| CDS CSUB_C0008   | -      | 5651   | 6082   | conserved hypothetical protein                                                   | S            | 143               |            |         |
| CDS CSUB_C0009   | -      | 6054   | 6323   | conserved hypothetical protein                                                   | S            | 89                |            |         |
| CDS CSUB_C0010   | -      | 6316   | 6723   | hypothetical protein                                                             | S            | 135               | arCOG05897 |         |
| CDS CSUB_C0011   | +      | 6752   | 7228   | hypothetical protein                                                             | S            | 158               | arCOG04705 | COG2098 |
| CDS CSUB_C0012   | -      | 7152   | 8264   | molecular chaperone DnaJ                                                         | O            | 370               | arCOG04771 | COG0484 |
| CDS CSUB_C0013   | -      | 8267   | 10045  | molecular chaperone DnaK                                                         | O            | 592               | arCOG03060 | COG0443 |
| CDS CSUB_C0014   | -      | 10133  | 10627  | molecular chaperone GrpE                                                         | O            | 164               | arCOG04772 | COG0576 |
| tRNA CSUB_T01    | +      | 10708  | 10812  | tRNA-Arg                                                                         |              |                   |            |         |
| CDS CSUB_C0015   | +      | 10950  | 12401  | hypothetical protein                                                             | S            | 483               |            |         |
| CDS CSUB_C0016   | -      | 12388  | 13455  | conserved hypothetical protein                                                   | R            | 355               | arCOG01395 | COG1817 |
| CDS CSUB_C0017   | +      | 13554  | 14540  | UDP-N-acetylglucosamine-dolichyl-phosphate N-acetylglucosaminophosphotransferase | M            | 328               | arCOG03199 | COG0472 |
| CDS CSUB_C0018   | +      | 14537  | 14803  | hypothetical protein                                                             | S            | 88                |            |         |
| CDS CSUB_C0019   | +      | 14775  | 15821  | hypothetical protein                                                             | S            | 348               |            |         |
| CDS CSUB_C0020   | +      | 15833  | 16819  | dehydrogenase                                                                    | R            | 328               | arCOG01622 | COG0673 |
| tRNA CSUB_T02    | -      | 16825  | 16900  | tRNA-Pro                                                                         |              |                   |            |         |
| CDS CSUB_C0021   | -      | 16942  | 17580  | hypothetical protein                                                             | T            | 212               | arCOG01173 | COG0467 |
| CDS CSUB_C0022   | -      | 17740  | 18096  | hypothetical protein                                                             | S            | 118               |            |         |
| CDS CSUB_C0023   | -      | 18374  | 19219  | hypothetical protein                                                             | S            | 281               |            |         |
| CDS CSUB_C0024   | +      | 19578  | 20285  | hypothetical protein                                                             | S            | 235               |            |         |
| CDS CSUB_C0025   | +      | 21199  | 24258  | type II restriction enzyme, methylase subunit                                    | V            | 1019              | arCOG02635 | COG1002 |
| CDS CSUB_C0026   | +      | 24242  | 27322  | helicase domain-containing protein                                               | K            | 1026              | arCOG04818 | COG0553 |
| CDS CSUB_C0027   | -      | 27475  | 27801  | hypothetical protein                                                             | S            | 108               |            |         |
| CDS CSUB_C0028   | +      | 28106  | 28510  | hypothetical protein                                                             | S            | 134               |            |         |
| CDS CSUB_C0029   | -      | 28820  | 29095  | conserved hypothetical protein                                                   | S            | 91                |            |         |
| CDS CSUB_C0030   | -      | 29596  | 30312  | hypothetical protein                                                             | S            | 238               |            |         |
| CDS CSUB_C0033-1 | +      | 31206  | 31625  | transposase                                                                      | L            | 139               | arCOG02134 | COG3316 |
| CDS CSUB_C0034   | +      | 31867  | 32742  | cobyrinic acid a,c-diamide synthase                                              | D            | 291               | arCOG00586 | COG1192 |
| CDS CSUB_C0035   | +      | 32745  | 33152  | hypothetical protein                                                             | S            | 135               |            |         |
| CDS CSUB_C0037   | +      | 35245  | 36705  | hypothetical protein                                                             | S            | 486               |            |         |
| CDS CSUB_C0038   | -      | 36729  | 36992  | hypothetical protein                                                             | S            | 87                |            |         |
| CDS CSUB_C0039   | -      | 37175  | 37612  | hypothetical protein                                                             | S            | 145               |            |         |
| CDS CSUB_C0040   | -      | 37615  | 38910  | conserved hypothetical protein                                                   | R            | 431               | arCOG03233 | COG4938 |
| CDS CSUB_C0041   | -      | 39340  | 40257  | conserved hypothetical protein                                                   | S            | 305               | arCOG04291 | COG1801 |
| CDS CSUB_C0042   | +      | 40296  | 41462  | conserved hypothetical protein                                                   | S            | 388               | arCOG04291 | COG1801 |
| CDS CSUB_C0043   | +      | 41587  | 42075  | hypothetical protein                                                             | S            | 162               |            |         |
| CDS CSUB_C0044   | -      | 42347  | 44851  | hypothetical protein                                                             | S            | 834               |            |         |
| CDS CSUB_C0045   | +      | 44842  | 45156  | hypothetical protein                                                             | S            | 104               |            |         |
| CDS CSUB_C0046   | +      | 45165  | 46376  | threonine synthase                                                               | E            | 403               | arCOG01434 | COG0498 |
| CDS CSUB_C0047   | +      | 46405  | 49293  | conserved hypothetical protein                                                   | S            | 962               |            |         |
| CDS CSUB_C0048   | +      | 49395  | 50858  | glyceraldehyde-3-phosphate dehydrogenase (NADP)                                  | C            | 487               | arCOG01252 | COG1012 |
| tRNA CSUB_T03    | +      | 50901  | 50975  | tRNA-Met                                                                         |              |                   |            |         |
| CDS CSUB_C0049-1 | -      | 51356  | 51865  | transposase                                                                      | L            | 169               | arCOG02134 | COG3316 |
| CDS CSUB_C0050   | +      | 52341  | 53393  | conserved hypothetical protein                                                   | S            | 350               |            |         |
| CDS CSUB_C0051   | -      | 54161  | 54553  | hypothetical protein                                                             | V            | 130               |            |         |
| CDS CSUB_C0052   | -      | 55191  | 55547  | conserved hypothetical protein                                                   | S            | 118               | arCOG02219 | COG1487 |
| CDS CSUB_C0053   | -      | 55544  | 55771  | conserved hypothetical protein                                                   | S            | 75                | arCOG07247 |         |
| CDS CSUB_C0054   | -      | 55855  | 56457  | transcriptional regulator                                                        | K            | 200               | arCOG01580 | COG1522 |
| CDS CSUB_C0055   | -      | 56497  | 56706  | conserved hypothetical protein                                                   | S            | 69                |            |         |
| CDS CSUB_C0056   | -      | 56715  | 59252  | Cu2+-exporting ATPase                                                            | P            | 845               | arCOG01576 | COG2217 |
| CDS CSUB_C0057   | -      | 59297  | 59464  | Cu2+-exporting ATPase                                                            | S            | 55                | arCOG04507 | COG3350 |
| CDS CSUB_C0058   | +      | 59866  | 60096  | conserved hypothetical protein                                                   | S            | 76                | arCOG02218 |         |
| CDS CSUB_C0059   | -      | 60423  | 61010  | conserved hypothetical protein                                                   | S            | 195               | arCOG01507 | COG4904 |
| CDS CSUB_C0060   | -      | 61018  | 64479  | molybdopterin oxidoreductase, molybdopterin binding subunit                      | C            | 1153              | arCOG01491 | COG0243 |
| CDS CSUB_C0061   | -      | 64472  | 65647  | molybdopterin oxidoreductase, membrane subunit                                   | S            | 391               | arCOG02024 | COG4881 |
| CDS CSUB_C0062   | -      | 65656  | 66327  | molybdopterin oxidoreductase, iron-sulfur binding subunit                        | C            | 223               | arCOG01500 | COG0437 |
| CDS CSUB_C0063   | -      | 66504  | 66932  | small subunit ribosomal protein S12                                              | J            | 142               | arCOG04255 | COG0048 |
| CDS CSUB_C0064   | -      | 66980  | 68023  | molybdenum cofactor biosynthesis protein A                                       | H            | 347               | arCOG00930 | COG2896 |
| CDS CSUB_C0065   | -      | 68033  | 69382  | cytochrome b/b6 domain-containing protein                                        | C            | 449               | arCOG01721 | COG1290 |
| CDS CSUB_C0066   | +      | 69462  | 70409  | aspartate carbamoyltransferase catalytic subunit                                 | F            | 315               | arCOG00911 | COG0540 |
| CDS CSUB_C0067   | -      | 70389  | 71684  | hypothetical protein                                                             | S            | 431               |            |         |
| CDS CSUB_C0068   | -      | 71718  | 72692  | pyruvate ferredoxin oxidoreductase, beta subunit                                 | C            | 324               | arCOG01601 | COG1013 |
| CDS CSUB_C0069   | -      | 72689  | 73921  | pyruvate ferredoxin oxidoreductase, alpha subunit                                | C            | 410               | arCOG01608 | COG0674 |
| CDS CSUB_C0070   | -      | 73914  | 74798  | pyruvate ferredoxin oxidoreductase, gamma subunit                                | C            | 294               | arCOG01604 | COG1144 |
| CDS CSUB_C0071   | +      | 74892  | 77003  | acetyl-CoA synthetase (ADP-forming), alpha and beta subunit                      | C            | 703               | arCOG01340 | COG1042 |
| tRNA CSUB_T04    | +      | 77030  | 77105  | tRNA-Pro                                                                         |              |                   |            |         |
| CDS CSUB_C0072   | +      | 77152  | 77742  | hypothetical protein                                                             | S            | 196               |            |         |
| CDS CSUB_C0073   | +      | 77747  | 78619  | conserved hypothetical protein                                                   | S            | 290               |            |         |
| CDS CSUB_C0074   | +      | 78577  | 79638  | hypothetical protein                                                             | S            | 353               |            |         |
| CDS CSUB_C0075   | +      | 79628  | 81259  | hypothetical protein                                                             | S            | 543               |            |         |
| CDS CSUB_C0076   | +      | 81309  | 82163  | lysine biosynthesis enzyme LysX                                                  | H            | 284               | arCOG01589 | COG0189 |
| CDS CSUB_C0077   | -      | 82129  | 82659  | peptidase, zinc-dependent                                                        | R            | 176               | arCOG00458 | COG1913 |
| CDS CSUB_C0078   | +      | 82682  | 83257  | conserved hypothetical protein                                                   | F            | 191               | arCOG01038 | COG1936 |
| CDS CSUB_C0079   | +      | 83326  | 85113  | ABC transporter ATP-binding protein                                              | R            | 595               | arCOG00187 | COG1245 |
| CDS CSUB_C0080   | +      | 85163  | 87343  | AAA family ATPase                                                                | O            | 726               | arCOG01308 | COG0464 |
| CDS CSUB_C0081   | +      | 87453  | 88073  | cell division protein ERCT-III/CdvB                                              | N            | 206               | arCOG00452 | COG5491 |
| CDS CSUB_C0082   | -      | 88085  | 88972  | iron complex ABC transporter substrate-binding protein                           | P            | 295               | arCOG04233 | COG0614 |
| CDS CSUB_C0083   | +      | 89031  | 89798  | undecaprenyl-diphosphatase                                                       | I            | 255               | arCOG04761 | COG1968 |
| CDS CSUB_C0084   | -      | 89795  | 90400  | conserved hypothetical protein                                                   | R            | 201               | arCOG04150 | COG1094 |
| CDS CSUB_C0085   | -      | 90406  | 91203  | RIO kinase I                                                                     | T            | 265               | arCOG01180 | COG1718 |
| CDS CSUB_C0086   | -      | 91418  | 92023  | acylphosphatase                                                                  | C            | 201               | arCOG01674 | COG1254 |
| CDS CSUB_C0087-1 | -      | 92122  | 92388  | transposase                                                                      | L            | 88                | arCOG02134 | COG3316 |
| tRNA CSUB_T05    | -      | 92453  | 92579  | tRNA-Tyr                                                                         |              |                   |            |         |
| CDS CSUB_C0088   | -      | 92557  | 93147  | hypothetical protein                                                             | S            | 196               |            |         |
| CDS CSUB_C0089   | -      | 93126  | 93740  | electron transport protein SCO1/SenC                                             | R            | 204               | arCOG00313 | COG1999 |
| CDS CSUB_C0090   | +      | 93869  | 96373  | ribonucleoside-diphosphate reductase alpha chain                                 | F            | 834               | arCOG04276 | COG0209 |
| CDS CSUB_C0091   | +      | 96405  | 96842  | osmotically inducible protein OsmC                                               | R            | 145               |            |         |
| CDS CSUB_C0092   | +      | 96835  | 97365  | conserved hypothetical protein                                                   | S            | 176               | arCOG03116 | COG1430 |
| CDS CSUB_C0093   | -      | 97354  | 98754  | Fe-S cluster assembly protein SuFB                                               | O            | 466               | arCOG01715 | COG0719 |
| CDS CSUB_C0094   | -      | 98833  | 101112 | xanthine dehydrogenase                                                           | C            | 759               | arCOG01167 | COG1529 |
| CDS CSUB_C0095   | +      | 101186 | 102334 | aminotransferase                                                                 | E            | 382               | arCOG00082 | COG0075 |
| CDS CSUB_C0096   | +      | 102338 | 102775 | conserved hypothetical protein                                                   | I            | 145               | arCOG00774 | COG2030 |
| CDS CSUB_C0097   | +      | 102801 | 103520 | threonyl/alanyl tRNA synthetase                                                  | R            | 239               | arCOG01254 | COG2872 |
| CDS CSUB_C0098   | -      | 106284 | 107507 | GTPase                                                                           | J            | 407               | arCOG00357 | COG0012 |
| CDS CSUB_C0099   | -      | 107551 | 108423 | sugar kinase                                                                     | G            | 290               | arCOG00018 | COG0063 |
| CDS CSUB_C0100   | +      | 108472 | 109233 | hypothetical protein                                                             | S            | 253               |            |         |
| CDS CSUB_C0101   | +      | 109226 | 109516 | archaea-specific DNA-binding protein Alba                                        | K            | 96                | arCOG01753 | COG1581 |
| CDS CSUB_C0102   | +      | 109663 | 110214 | small GTP-binding protein                                                        | R            | 183               |            |         |
| CDS CSUB_C0103   | +      | 110204 | 111226 | hypothetical protein                                                             | S            | 340               |            |         |
| CDS CSUB_C0104   | +      | 111254 | 112300 | conserved hypothetical protein                                                   | S            | 348               |            |         |

|      |            |   |        |        |                                                               |   |     |            |         |
|------|------------|---|--------|--------|---------------------------------------------------------------|---|-----|------------|---------|
| CDS  | CSUB_C0105 | + | 112304 | 113098 | voltage-gated potassium channel                               | P | 264 | arCOG01964 | COG1226 |
| CDS  | CSUB_C0106 | + | 113101 | 114225 | major facilitator superfamily MFS                             | G | 374 | arCOG00130 | COG0477 |
| CDS  | CSUB_C0107 | + | 114255 | 115205 | threonine dehydratase                                         | E | 316 | arCOG01431 | COG1171 |
| CDS  | CSUB_C0108 | + | 115247 | 115582 | translation initiation factor eIF-1A                          | J | 111 | arCOG01179 | COG0361 |
| CDS  | CSUB_C0109 | - | 115579 | 117159 | elongation factor EF-1 alpha subunit                          | R | 526 | arCOG01562 | COG5258 |
| CDS  | CSUB_C0110 | - | 117159 | 117401 | transcriptional regulator, AsnC                               | K | 80  | arCOG01117 | COG1522 |
| CDS  | CSUB_C0111 | - | 117441 | 117803 | regulatory protein, AsnC/Lrp family                           | K | 120 | arCOG01117 | COG1522 |
| CDS  | CSUB_C0112 | - | 117803 | 118054 | AsnC family transcriptional regulator                         | K | 83  | arCOG01117 | COG1522 |
| CDS  | CSUB_C0113 | - | 118061 | 119497 | glutamine synthetase                                          | E | 478 | arCOG01909 | COG0174 |
| CDS  | CSUB_C0114 | - | 119990 | 120382 | conserved hypothetical protein                                | S | 130 | arCOG03749 | COG4243 |
| CDS  | CSUB_C0115 | - | 120379 | 120972 | thiol-disulfide oxidoreductase                                | O | 197 | arCOG03562 | COG0526 |
| CDS  | CSUB_C0116 | + | 121063 | 122463 | drug resistance transporter EmrB/QacA subfamily               | G | 466 | arCOG00143 | COG0477 |
| CDS  | CSUB_C0117 | + | 122491 | 124131 | CTP synthetase                                                | F | 546 | arCOG00463 | COG0504 |
| CDS  | CSUB_C0118 | - | 124128 | 125393 | ABC-2 type transport system permease                          | C | 421 | arCOG01462 | COG1668 |
| CDS  | CSUB_C0119 | - | 125390 | 126112 | ABC-2 type transport system ATP-binding protein               | V | 240 | arCOG00194 | COG1131 |
| CDS  | CSUB_C0120 | + | 126151 | 127002 | conserved hypothetical protein                                | G | 283 | arCOG03425 | COG0697 |
| tRNA | CSUB_T06   | + | 127030 | 127103 | tRNA-Asn                                                      |   |     |            |         |
| CDS  | CSUB_C0121 | - | 127152 | 128027 | type I restriction enzyme R protein N terminal domain protein | S | 291 |            |         |
| CDS  | CSUB_C0122 | + | 128100 | 128519 | nitrogen fixation protein NifU                                | C | 139 | arCOG02077 | COG0822 |
| CDS  | CSUB_C0123 | + | 128547 | 129713 | metal-dependent phosphohydrolase                              | R | 388 | arCOG04430 | COG1078 |
| CDS  | CSUB_C0124 | - | 129886 | 130089 | glutamyl-tRNA(Gln) amidotransferase subunit D                 | E | 67  | arCOG01924 | COG0252 |
| CDS  | CSUB_C0125 | - | 130647 | 131513 | hypothetical protein                                          | S | 288 |            |         |
| CDS  | CSUB_C0126 | + | 131705 | 132115 | hypothetical protein                                          | S | 136 |            |         |
| CDS  | CSUB_C0127 | - | 132140 | 132742 | dTMP kinase                                                   | F | 200 | arCOG01891 | COG0125 |
| CDS  | CSUB_C0128 | + | 132772 | 134463 | dihydroxy-acid dehydratase                                    | E | 563 | arCOG04045 | COG0129 |
| CDS  | CSUB_C0129 | + | 134527 | 134808 | conserved hypothetical protein                                | S | 93  | arCOG04308 | COG1698 |
| CDS  | CSUB_C0130 | + | 134869 | 136266 | citrate transporter                                           | P | 465 | arCOG00238 | COG1055 |
| CDS  | CSUB_C0131 | + | 136593 | 137423 | chorismate mutase / prephenate dehydratase                    | E | 276 | arCOG00255 | COG0077 |
| CDS  | CSUB_C0132 | - | 137406 | 138305 | 6-phosphogluconate dehydrogenase NAD-binding                  | I | 299 | arCOG00247 | COG2084 |
| CDS  | CSUB_C0133 | + | 138381 | 139076 | hypothetical protein                                          | S | 231 |            |         |
| CDS  | CSUB_C0134 | - | 139066 | 139215 | CopG/Arc/MeJ family transcriptional regulator                 | K | 49  | arCOG01009 | COG3609 |
| CDS  | CSUB_C0135 | + | 139321 | 140976 | thermosome subunit alpha                                      | O | 551 | arCOG01257 | COG0459 |
| CDS  | CSUB_C0136 | + | 140957 | 141214 | DNA-directed RNA polymerase subunit K                         | K | 85  | arCOG01268 | COG1758 |
| CDS  | CSUB_C0137 | + | 141207 | 141404 | hypothetical protein                                          | S | 65  |            |         |
| CDS  | CSUB_C0138 | + | 141482 | 142576 | conserved hypothetical protein                                | S | 364 | arCOG04253 | COG1415 |
| CDS  | CSUB_C0139 | - | 142573 | 143646 | myo-inositol-1-phosphate synthase                             | I | 357 | arCOG04213 | COG1260 |
| CDS  | CSUB_C0140 | - | 143697 | 144014 | PadR family transcriptional regulator                         | K | 105 | arCOG00001 | COG1695 |
| CDS  | CSUB_C0141 | - | 144241 | 146214 | enoyl-CoA hydratase                                           | I | 657 | arCOG00249 | COG1250 |
| CDS  | CSUB_C0142 | - | 146480 | 147709 | cysteine desulfurase / selenocysteine lyase                   | O | 409 | arCOG00065 | COG0520 |
| CDS  | CSUB_C0143 | - | 147752 | 149578 | threonyl-tRNA synthetase                                      | J | 608 | arCOG00401 | COG0441 |
| CDS  | CSUB_C0144 | + | 149798 | 150082 | conserved hypothetical protein                                | K | 94  | arCOG00823 | COG2002 |
| CDS  | CSUB_C0145 | + | 150069 | 150434 | conserved hypothetical protein                                | V | 121 | arCOG00713 | COG1848 |
| CDS  | CSUB_C0146 | + | 150955 | 151437 | bacterioferritin                                              | R | 160 | arCOG01093 | COG2406 |
| CDS  | CSUB_C0147 | + | 151728 | 152294 | hypothetical protein                                          | S | 188 |            |         |
| CDS  | CSUB_C0148 | + | 152331 | 152594 | hypothetical protein                                          | S | 87  |            |         |
| CDS  | CSUB_C0149 | + | 152994 | 154232 | GTP-binding protein HBX                                       | R | 412 | arCOG00353 | COG2262 |
| CDS  | CSUB_C0150 | + | 154222 | 154686 | RNA binding PUA domain protein                                | O | 154 | arCOG00991 | COG1370 |
| CDS  | CSUB_C0151 | + | 154713 | 155081 | nascent polypeptide-associated complex protein Nac            | K | 122 | arCOG04061 | COG1308 |
| CDS  | CSUB_C0152 | - | 155070 | 156677 | hypothetical protein                                          | S | 535 |            |         |
| CDS  | CSUB_C0153 | + | 156666 | 157667 | ornithine carbamoyltransferase                                | E | 333 | arCOG00912 | COG0078 |
| CDS  | CSUB_C0154 | + | 157892 | 158800 | hypothetical protein                                          | J | 302 |            |         |
| CDS  | CSUB_C0155 | + | 158836 | 159324 | large subunit ribosomal protein L11                           | S | 162 | arCOG04372 | COG0080 |
| CDS  | CSUB_C0156 | + | 159324 | 159980 | large subunit ribosomal protein L1                            | J | 218 | arCOG04289 | COG0081 |
| CDS  | CSUB_C0157 | + | 160038 | 160901 | large subunit ribosomal protein L10                           | J | 287 | arCOG04288 | COG0244 |
| CDS  | CSUB_C0158 | - | 160872 | 163601 | alanyl-tRNA synthetase                                        | J | 909 | arCOG01255 | COG0013 |
| CDS  | CSUB_C0159 | - | 163649 | 165097 | hypothetical protein                                          | S | 482 |            |         |
| CDS  | CSUB_C0160 | - | 165147 | 165884 | ABC-2 type transport system ATP-binding protein               | V | 245 | arCOG00194 | COG1131 |
| CDS  | CSUB_C0161 | - | 165927 | 166238 | large subunit ribosomal protein L12                           | J | 103 | arCOG04287 | COG2058 |
| CDS  | CSUB_C0162 | + | 166386 | 167486 | conserved hypothetical protein                                | S | 366 | arCOG04253 | COG1415 |
| CDS  | CSUB_C0163 | - | 167483 | 167773 | elongation factor EF-1 beta subunit                           | J | 96  | arCOG01988 | COG2092 |
| CDS  | CSUB_C0164 | - | 167775 | 168674 | conserved hypothetical protein                                | H | 299 | arCOG01872 | COG0746 |
| CDS  | CSUB_C0165 | - | 168671 | 169198 | molybdopterin-guanine dinucleotide biosynthesis protein B     | H | 175 | arCOG00532 | COG1763 |
| CDS  | CSUB_C0167 | + | 169500 | 170174 | ribose 5-phosphate isomerase A                                | G | 224 | arCOG01122 | COG0120 |
| CDS  | CSUB_C0168 | + | 170207 | 170791 | conserved hypothetical protein                                | S | 194 | arCOG01644 | COG2245 |
| CDS  | CSUB_C0169 | - | 170788 | 171507 | hypothetical protein                                          | K | 239 | arCOG02037 | COG1378 |
| CDS  | CSUB_C0170 | + | 171581 | 172285 | ubiquinone/menaquinone biosynthesis methyltransferase         | H | 234 | arCOG04348 | COG2226 |
| CDS  | CSUB_C0171 | + | 172325 | 173782 | conserved hypothetical protein                                | S | 485 |            |         |
| CDS  | CSUB_C0172 | + | 173784 | 174641 | 4-hydroxybenzoate octaprenyltransferase                       | H | 285 | arCOG00478 | COG0382 |
| CDS  | CSUB_C0173 | - | 174634 | 175794 | hypothetical protein                                          | S | 386 |            |         |
| CDS  | CSUB_C0174 | - | 175827 | 176705 | circadian clock protein KaiC                                  | T | 292 | arCOG01171 | COG0467 |
| CDS  | CSUB_C0175 | + | 176734 | 177468 | hypothetical protein                                          | S | 244 |            |         |
| CDS  | CSUB_C0176 | + | 177465 | 178340 | conserved hypothetical protein                                | H | 291 | arCOG04238 | COG1767 |
| CDS  | CSUB_C0177 | - | 178345 | 178635 | hypothetical protein                                          | S | 96  | arCOG05413 |         |
| CDS  | CSUB_C0178 | - | 178617 | 178946 | transcriptional regulator, ArsR family                        | K | 109 | arCOG00731 | COG0640 |
| CDS  | CSUB_C0179 | - | 178975 | 179769 | cyclase family protein                                        | E | 264 | arCOG02462 | COG1878 |
| CDS  | CSUB_C0180 | - | 179815 | 181017 | formyl-CoA transferase                                        | C | 400 | arCOG02304 | COG1804 |
| CDS  | CSUB_C0181 | + | 181086 | 181883 | 3-hydroxybutyryl-CoA dehydratase                              | I | 265 | arCOG00239 | COG1024 |
| CDS  | CSUB_C0182 | - | 181884 | 182468 | conserved hypothetical protein                                | J | 194 | arCOG04130 | COG1491 |
| CDS  | CSUB_C0183 | - | 182482 | 182838 | DNA-directed RNA polymerase subunit F                         | K | 118 | arCOG01016 | COG1460 |
| CDS  | CSUB_C0184 | - | 182842 | 183129 | large subunit ribosomal protein L21e                          | J | 95  | arCOG04129 | COG2139 |
| CDS  | CSUB_C0185 | - | 183173 | 184492 | conserved hypothetical protein                                | J | 439 | arCOG01015 | COG1258 |
| CDS  | CSUB_C0186 | - | 184485 | 185885 | signal recognition particle, subunit SRP54                    | U | 466 | arCOG01228 | COG0541 |
| CDS  | CSUB_C0187 | + | 185854 | 186810 | UDP-glucose 4-epimerase                                       | M | 318 | arCOG01369 | COG0451 |
| tRNA | CSUB_T07   | + | 186801 | 186874 | tRNA-Ala                                                      |   |     |            |         |
| tRNA | CSUB_T08   | + | 187064 | 187138 | tRNA-Met                                                      |   |     |            |         |
| CDS  | CSUB_C0188 | + | 187200 | 187952 | conserved hypothetical protein                                | S | 250 |            |         |
| tRNA | CSUB_T09   | + | 187952 | 188025 | tRNA-Gly                                                      |   |     |            |         |
| CDS  | CSUB_C0189 | - | 188007 | 188990 | conserved hypothetical protein                                | L | 327 | arCOG03156 | COG3780 |
| CDS  | CSUB_C0190 | + | 189359 | 190729 | glycosyl transferase group 1                                  | M | 456 | arCOG01408 | COG0438 |
| CDS  | CSUB_C0191 | + | 190726 | 191493 | small conductance mechanosensitive ion channel, MscS family   | M | 255 | arCOG01568 | COG0668 |
| CDS  | CSUB_C0192 | + | 191548 | 192435 | methionyl aminopeptidase                                      | J | 295 | arCOG01001 | COG0024 |
| CDS  | CSUB_C0193 | - | 192428 | 192604 | conserved hypothetical protein                                | S | 58  | arCOG03770 |         |
| CDS  | CSUB_C0194 | - | 192646 | 193794 | conserved hypothetical protein                                | S | 382 | arCOG04181 | COG4046 |
| CDS  | CSUB_C0195 | - | 193818 | 195638 | DNA topoisomerase IA                                          | L | 606 | arCOG01527 | COG0550 |
| CDS  | CSUB_C0196 | - | 195642 | 196172 | hypothetical protein                                          | S | 176 |            |         |
| tRNA | CSUB_T10   | + | 196258 | 196352 | tRNA-Phe                                                      |   |     |            |         |
| CDS  | CSUB_C0197 | - | 196513 | 197313 | 3-oxoacyl-[acyl-carrier protein] reductase                    | I | 266 | arCOG01259 | COG1028 |
| CDS  | CSUB_C0198 | + | 197412 | 198083 | methylated-DNA [protein]-cysteine S-methyltransferase         | L | 223 | arCOG02724 | COG0350 |
| CDS  | CSUB_C0199 | - | 198371 | 198625 | conserved hypothetical protein                                | O | 84  | arCOG06207 | COG3526 |
| CDS  | CSUB_C0200 | + | 198766 | 200670 | quinoprotein alcohol dehydrogenase                            | S | 634 |            |         |
| CDS  | CSUB_C0201 | - | 201545 | 202153 | hypothetical protein                                          | S | 202 |            |         |
| CDS  | CSUB_C0202 | - | 202163 | 202639 | hypothetical protein                                          | S | 158 |            |         |
| CDS  | CSUB_C0203 | + | 203212 | 204324 | ABC transporter ATP-binding protein                           | G | 370 | arCOG00175 | COG3839 |
| CDS  | CSUB_C0204 | + | 204401 | 205345 | conserved hypothetical protein                                | P | 314 | arCOG01803 | COG0715 |
| CDS  | CSUB_C0205 | - | 205342 | 207036 | iron complex ABC transporter permease                         | P | 564 | arCOG00163 | COG1178 |
| CDS  | CSUB_C0206 | - | 207043 | 208392 | iron complex ABC transporter substrate-binding protein        | P | 449 | arCOG00227 | COG1840 |
| CDS  | CSUB_C0207 | + | 208367 | 209074 | hypothetical protein                                          | S | 235 |            |         |

|     |            |   |        |        |                                                                     |   |      |            |         |
|-----|------------|---|--------|--------|---------------------------------------------------------------------|---|------|------------|---------|
| CDS | CSUB_C0208 | - | 209061 | 209687 | pyrroloquinoline-quinone synthase                                   | H | 208  |            |         |
| CDS | CSUB_C0209 | - | 209684 | 210553 | hypothetical protein                                                | S | 289  |            |         |
| CDS | CSUB_C0210 | + | 210645 | 211124 | conserved hypothetical protein                                      | S | 159  |            |         |
| CDS | CSUB_C0211 | + | 211137 | 212204 | sugar ABC transporter ATP-binding protein                           | G | 355  | arCOG00175 | COG3839 |
| CDS | CSUB_C0212 | + | 212201 | 213085 | multiple sugar ABC transporter permease                             | G | 294  | arCOG00157 | COG1175 |
| CDS | CSUB_C0213 | + | 213082 | 213921 | multiple sugar ABC transporter permease                             | G | 279  | arCOG00159 | COG0395 |
| CDS | CSUB_C0214 | - | 214134 | 215336 | kelch repeat protein                                                | S | 400  | arCOG05978 |         |
| CDS | CSUB_C0215 | + | 215339 | 215818 | hypothetical protein                                                | S | 159  |            |         |
| CDS | CSUB_C0216 | - | 215831 | 218047 | quinoprotein alcohol dehydrogenase                                  | S | 738  |            |         |
| CDS | CSUB_C0217 | - | 218112 | 218891 | short-chain dehydrogenase/reductase                                 | R | 259  | arCOG01263 | COG0300 |
| CDS | CSUB_C0218 | + | 218984 | 219835 | hypothetical protein                                                | S | 283  |            |         |
| CDS | CSUB_C0219 | + | 219841 | 220350 | hypothetical protein                                                | S | 169  |            |         |
| CDS | CSUB_C0220 | + | 220347 | 220862 | hypothetical protein                                                | S | 171  |            |         |
| CDS | CSUB_C0221 | + | 220841 | 222319 | multiple sugar ABC transporter substrate-binding protein            | G | 492  | arCOG00151 | COG1653 |
| CDS | CSUB_C0222 | + | 222462 | 222914 | hypothetical protein                                                | S | 150  |            |         |
| CDS | CSUB_C0223 | - | 222911 | 224266 | major facilitator superfamily MFS                                   | G | 451  | arCOG00143 | COG0477 |
| CDS | CSUB_C0224 | - | 224355 | 226247 | quinoprotein alcohol dehydrogenase                                  | S | 630  |            |         |
| CDS | CSUB_C0225 | + | 226351 | 227265 | ABC transporter ATP-binding protein                                 | V | 304  | arCOG00194 | COG1131 |
| CDS | CSUB_C0226 | + | 227274 | 228101 | ABC-2 type transport system permease                                | R | 275  | arCOG02440 | COG1277 |
| CDS | CSUB_C0227 | - | 228079 | 230067 | conserved hypothetical protein                                      | S | 662  |            |         |
| CDS | CSUB_C0228 | + | 230098 | 230490 | hypothetical protein                                                | S | 130  |            |         |
| CDS | CSUB_C0229 | + | 230609 | 231025 | conserved hypothetical protein                                      | S | 138  | arCOG03426 | COG2510 |
| CDS | CSUB_C0230 | + | 231062 | 232504 | methylmalonate-semialdehyde dehydrogenase                           | C | 480  | arCOG01252 | COG1012 |
| CDS | CSUB_C0231 | + | 232504 | 233112 | conserved hypothetical protein                                      | S | 202  |            |         |
| CDS | CSUB_C0232 | - | 233109 | 234077 | branched-chain amino acid ABC transporter permease                  | E | 322  | arCOG01273 | COG4177 |
| CDS | CSUB_C0233 | - | 234071 | 234943 | branched-chain amino acid ABC transporter permease                  | E | 290  | arCOG00924 | COG0410 |
| CDS | CSUB_C0234 | - | 234944 | 235663 | branched-chain amino acid ABC transporter ATP-binding protein       | E | 239  | arCOG00926 | COG0411 |
| CDS | CSUB_C0235 | - | 235641 | 236387 | branched-chain amino acid ABC transporter ATP-binding protein       | E | 405  | arCOG01201 | COG0683 |
| CDS | CSUB_C0236 | - | 236426 | 237643 | branched-chain amino acid ABC transporter substrate-binding protein | E | 328  | arCOG02410 | COG2141 |
| CDS | CSUB_C0237 | - | 237676 | 238662 | luciferase family protein                                           | C | 394  |            |         |
| CDS | CSUB_C0238 | - | 238662 | 239846 | amidohydrolase                                                      | R | 759  |            |         |
| CDS | CSUB_C0239 | - | 239871 | 242177 | molybdopterin binding oxidoreductase large subunit                  | C | 211  | arCOG01167 | COG1529 |
| CDS | CSUB_C0240 | + | 242286 | 243035 | conserved hypothetical protein                                      | S | 249  | arCOG04715 | COG2968 |
| CDS | CSUB_C0241 | + | 243075 | 243932 | conserved hypothetical protein                                      | G | 285  | arCOG00271 | COG0697 |
| CDS | CSUB_C0242 | - | 243914 | 244903 | ornithine cyclodeaminase                                            | E | 329  | arCOG01035 | COG2423 |
| CDS | CSUB_C0243 | + | 244935 | 247214 | hypothetical protein                                                | R | 759  |            |         |
| CDS | CSUB_C0244 | - | 247133 | 247768 | adenine phosphoribosyltransferase                                   | F | 211  | arCOG00029 | COG0461 |
| CDS | CSUB_C0245 | - | 247790 | 248911 | major facilitator superfamily MFS                                   | G | 373  | arCOG00130 | COG0477 |
| CDS | CSUB_C0246 | + | 248981 | 250123 | acyl-CoA dehydrogenase                                              | I | 380  | arCOG04350 | COG1960 |
| CDS | CSUB_C0247 | - | 250120 | 251097 | ornithine cyclodeaminase                                            | E | 325  | arCOG01035 | COG2423 |
| CDS | CSUB_C0248 | - | 251099 | 252409 | phenylacetate-CoA ligase                                            | H | 436  | arCOG02620 | COG1541 |
| CDS | CSUB_C0249 | + | 252504 | 253469 | fumarylacetoacetate hydrolase family protein                        | Q | 321  | arCOG00235 | COG0179 |
| CDS | CSUB_C0250 | + | 253471 | 254676 | carboxyltransferase                                                 | E | 401  | arCOG02092 | COG0119 |
| CDS | CSUB_C0251 | + | 254649 | 255725 | pyruvate dehydrogenase E1 component subunit alpha                   | C | 358  | arCOG01054 | COG1071 |
| CDS | CSUB_C0252 | + | 255722 | 256582 | conserved hypothetical protein                                      | K | 286  | arCOG01875 | COG1475 |
| CDS | CSUB_C0253 | - | 256551 | 257483 | D-3-phosphoglycerate dehydrogenase                                  | H | 310  | arCOG01754 | COG0111 |
| CDS | CSUB_C0254 | + | 257583 | 257867 | small subunit ribosomal protein S26e                                | J | 94   | arCOG04305 | COG4830 |
| CDS | CSUB_C0255 | + | 257924 | 258892 | peptidase M48                                                       | O | 322  | arCOG01331 | COG0501 |
| CDS | CSUB_C0256 | - | 258879 | 260333 | prolyl-tRNA synthetase                                              | J | 484  | arCOG00402 | COG0442 |
| CDS | CSUB_C0257 | + | 260623 | 260928 | conserved hypothetical protein                                      | S | 101  | arCOG04024 |         |
| CDS | CSUB_C0258 | + | 260925 | 261143 | conserved hypothetical protein                                      | S | 72   | arCOG02270 | COG5428 |
| CDS | CSUB_C0259 | + | 261445 | 262128 | V-type H <sup>+</sup> -transporting ATPase subunit D                | C | 227  | arCOG04101 | COG1394 |
| CDS | CSUB_C0260 | + | 262278 | 262913 | hypothetical protein                                                | S | 211  |            |         |
| CDS | CSUB_C0261 | + | 262962 | 263372 | conserved hypothetical protein                                      | O | 136  | arCOG03743 | COG5550 |
| CDS | CSUB_C0262 | + | 263464 | 263871 | conserved hypothetical protein                                      | S | 135  | arCOG01191 | COG2250 |
| CDS | CSUB_C0263 | + | 263841 | 264296 | conserved hypothetical protein                                      | R | 151  | arCOG01204 | COG1708 |
| CDS | CSUB_C0264 | + | 264336 | 265202 | UTP-glucose-1-phosphate uridylyltransferase                         | M | 288  | arCOG00665 | COG1210 |
| CDS | CSUB_C0265 | + | 265199 | 266512 | UDP-glucose 6-dehydrogenase                                         | M | 437  | arCOG00253 | COG1004 |
| CDS | CSUB_C0266 | + | 266509 | 267474 | glycosyl transferase family 1                                       | M | 321  | arCOG01403 | COG0438 |
| CDS | CSUB_C0267 | + | 267530 | 268474 | conserved hypothetical protein                                      | M | 314  | arCOG01403 | COG0438 |
| CDS | CSUB_C0268 | + | 268716 | 269723 | conserved hypothetical protein                                      | M | 335  | arCOG01369 | COG0451 |
| CDS | CSUB_C0269 | - | 269748 | 270377 | conserved hypothetical protein                                      | Q | 209  | arCOG01774 | COG0500 |
| CDS | CSUB_C0270 | - | 270433 | 271923 | conserved hypothetical protein                                      | S | 496  | arCOG02216 |         |
| CDS | CSUB_C0271 | + | 272205 | 273071 | conserved hypothetical protein                                      | M | 288  | arCOG01410 | COG0438 |
| CDS | CSUB_C0272 | + | 273305 | 274408 | glycosyl transferases group 1                                       | M | 367  | arCOG01403 | COG0438 |
| CDS | CSUB_C0273 | + | 274434 | 275399 | NAD-dependent epimerase/dehydratase                                 | M | 321  | arCOG01369 | COG0451 |
| CDS | CSUB_C0274 | - | 275456 | 275749 | conserved hypothetical protein                                      | S | 97   | arCOG01192 | COG2250 |
| CDS | CSUB_C0275 | - | 275835 | 276356 | DNA polymerase beta domain protein                                  | R | 173  | arCOG01203 | COG1708 |
| CDS | CSUB_C0276 | - | 276477 | 276632 | small subunit ribosomal protein S30e                                | J | 51   | arCOG04293 | COG4919 |
| CDS | CSUB_C0277 | - | 276701 | 277996 | hypothetical protein                                                | S | 431  |            |         |
| CDS | CSUB_C0278 | - | 278083 | 278721 | hypothetical protein                                                | S | 212  |            |         |
| CDS | CSUB_C0279 | - | 278817 | 279209 | hypothetical protein                                                | S | 130  |            |         |
| CDS | CSUB_C0280 | + | 279441 | 280619 | pre-mRNA processing ribonucleoprotein, binding region               | J | 392  | arCOG01923 | COG1498 |
| CDS | CSUB_C0281 | + | 280616 | 281311 | fibrillar-like pre-rRNA processing protein                          | J | 231  | arCOG00078 | COG1889 |
| CDS | CSUB_C0282 | + | 281316 | 281885 | ribonuclease HII                                                    | L | 189  | arCOG04121 | COG0164 |
| CDS | CSUB_C0283 | + | 281964 | 282488 | nucleotide kinase                                                   | F | 174  | arCOG01034 | COG1618 |
| CDS | CSUB_C0284 | + | 282548 | 283648 | tRNA (guanine-N2-)-methyltransferase                                | J | 366  | arCOG01219 | COG1867 |
| CDS | CSUB_C0285 | - | 283599 | 284273 | ribosomal RNA large subunit methyltransferase E FtsJ                | J | 224  | arCOG00079 | COG0293 |
| CDS | CSUB_C0286 | - | 284275 | 284622 | conserved hypothetical protein                                      | K | 115  | arCOG04153 | COG1522 |
| CDS | CSUB_C0287 | - | 284669 | 285376 | transcription initiation factor TFIIIB                              | K | 235  | arCOG01981 | COG1405 |
| CDS | CSUB_C0288 | - | 285460 | 285708 | RNA-binding protein                                                 | J | 82   | arCOG02466 | COG3277 |
| CDS | CSUB_C0289 | - | 285698 | 285985 | signal recognition particle subunit SRP19                           | U | 95   | arCOG01217 | COG1400 |
| CDS | CSUB_C0290 | - | 285982 | 286371 | small subunit ribosomal protein S8e                                 | J | 129  | arCOG04154 | COG2007 |
| CDS | CSUB_C0291 | - | 286301 | 286897 | segregation and condensation protein B                              | K | 198  | arCOG02613 | COG1386 |
| CDS | CSUB_C0292 | - | 286890 | 287579 | segregation and condensation protein A                              | L | 229  | arCOG02610 | COG1354 |
| CDS | CSUB_C0293 | - | 287566 | 290925 | chromosome segregation protein SMC                                  | D | 1119 | arCOG00371 | COG1196 |
| CDS | CSUB_C0294 | + | 291270 | 292133 | hypothetical protein                                                | E | 287  | arCOG01000 | COG0006 |
| CDS | CSUB_C0295 | - | 292130 | 292912 | undecaprenyl pyrophosphate synthetase                               | I | 260  | arCOG01532 | COG0020 |
| CDS | CSUB_C0296 | - | 292920 | 294104 | conserved hypothetical protein                                      | R | 394  | arCOG04151 | COG2237 |
| CDS | CSUB_C0297 | - | 294828 | 295217 | DNA polymerase beta subunit                                         | R | 129  | arCOG02106 | COG1708 |
| CDS | CSUB_C0298 | - | 295214 | 295624 | hypothetical protein                                                | S | 136  | arCOG02109 | COG2445 |
| CDS | CSUB_C0299 | + | 295711 | 296064 | hypothetical protein                                                | S | 117  |            |         |
| CDS | CSUB_C0300 | + | 296099 | 296518 | small subunit ribosomal protein S19                                 | J | 139  | arCOG04099 | COG0185 |
| CDS | CSUB_C0301 | + | 296611 | 296898 | hypothetical protein                                                | S | 95   |            |         |
| CDS | CSUB_C0302 | - | 296926 | 297651 | large subunit ribosomal protein L2                                  | J | 241  | arCOG04067 | COG0090 |
| CDS | CSUB_C0303 | - | 297663 | 297923 | large subunit ribosomal protein L23                                 | J | 86   | arCOG04072 | COG0089 |
| CDS | CSUB_C0304 | - | 297920 | 298738 | large subunit ribosomal protein L4e                                 | J | 272  | arCOG04071 | COG0088 |
| CDS | CSUB_C0305 | - | 298742 | 299704 | large subunit ribosomal protein L3                                  | J | 320  | arCOG04070 | COG0087 |
| CDS | CSUB_C0306 | + | 299736 | 300269 | hypothetical protein                                                | S | 177  |            |         |
| CDS | CSUB_C0307 | + | 300474 | 301673 | hypothetical protein                                                | E | 399  | arCOG00071 | COG0367 |
| CDS | CSUB_C0308 | + | 301670 | 302137 | conserved hypothetical protein                                      | R | 155  | arCOG04311 | COG1896 |
| CDS | CSUB_C0309 | + | 302166 | 303239 | DNA primase, large subunit                                          | L | 357  | arCOG03013 | COG2219 |
| CDS | CSUB_C0310 | + | 303271 | 304413 | conserved hypothetical protein                                      | G | 380  | arCOG00130 | COG0477 |
| CDS | CSUB_C0311 | - | 304693 | 305304 | superoxide dismutase                                                | P | 203  | arCOG04147 | COG0605 |
| CDS | CSUB_C0312 | - | 305346 | 306311 | hypothetical protein                                                | G | 321  | arCOG00130 | COG0477 |
| CDS | CSUB_C0313 | - | 306618 | 307820 | hypothetical protein                                                | S | 400  |            |         |
| CDS | CSUB_C0314 | + | 307901 | 308554 | endonuclease III                                                    | L | 217  | arCOG00459 | COG0177 |



|      |            |   |        |        |                                                                     |   |     |            |         |
|------|------------|---|--------|--------|---------------------------------------------------------------------|---|-----|------------|---------|
| CDS  | CSUB_C0418 | - | 405884 | 406588 | adenine phosphoribosyltransferase, fused to N-terminal DNA-binding  | F | 234 | arCOG00031 | COG0503 |
| CDS  | CSUB_C0419 | + | 406678 | 408861 | molybdenum hydroxylase family protein, large subunit                | C | 727 | arCOG01167 | COG1529 |
| CDS  | CSUB_C0420 | - | 408842 | 409306 | molybdenum hydroxylase family protein, small subunit                | C | 154 | arCOG01925 | COG2080 |
| CDS  | CSUB_C0421 | - | 409293 | 410162 | molybdenum hydroxylase family protein, medium subunit               | C | 289 | arCOG01926 | COG1319 |
| CDS  | CSUB_C0422 | + | 410209 | 411651 | dihydropyrimidinase                                                 | F | 480 | arCOG00689 | COG0044 |
| CDS  | CSUB_C0423 | + | 411648 | 412502 | conserved hypothetical protein                                      | R | 284 | arCOG01728 | COG1355 |
| CDS  | CSUB_C0424 | + | 412499 | 413458 | mevalonate kinase                                                   | I | 319 | arCOG01028 | COG1577 |
| CDS  | CSUB_C0425 | + | 413455 | 414237 | acetylglutamate kinase                                              | R | 260 | arCOG00860 | COG1608 |
| CDS  | CSUB_C0426 | + | 414239 | 415315 | isopentenyl-diphosphate delta-isomerase                             | H | 358 | arCOG00613 | COG1304 |
| CDS  | CSUB_C0427 | - | 415290 | 417014 | glutamyl-tRNA synthetase                                            | J | 574 | arCOG04302 | COG0008 |
| CDS  | CSUB_C0428 | + | 417130 | 417501 | large subunit ribosomal protein L7Ae                                | J | 123 | arCOG01751 | COG1358 |
| CDS  | CSUB_C0429 | + | 417513 | 417734 | small subunit ribosomal protein S28e                                | J | 73  | arCOG04314 | COG2053 |
| CDS  | CSUB_C0430 | + | 417742 | 417915 | large subunit ribosomal protein L24e                                | J | 57  | arCOG01950 | COG2075 |
| CDS  | CSUB_C0431 | + | 417923 | 418339 | nucleoside diphosphate kinase                                       | F | 138 | arCOG04313 | COG0105 |
| CDS  | CSUB_C0432 | + | 418364 | 419602 | translation initiation factor eIF-2 gamma subunit                   | J | 412 | arCOG01563 | COG5257 |
| CDS  | CSUB_C0433 | + | 419631 | 419990 | conserved hypothetical protein                                      | R | 119 | arCOG04312 | COG1412 |
| CDS  | CSUB_C0434 | + | 420037 | 420600 | DNA-directed RNA polymerase subunit E'                              | K | 187 | arCOG00675 | COG1095 |
| CDS  | CSUB_C0435 | + | 420590 | 420781 | DNA-directed RNA polymerase subunit E''                             | K | 63  | arCOG04077 | COG2093 |
| CDS  | CSUB_C0436 | + | 420774 | 421280 | conserved hypothetical protein                                      | S | 168 | arCOG04076 | COG1909 |
| CDS  | CSUB_C0437 | - | 421270 | 421428 | small subunit ribosomal protein S27Ae                               | J | 52  | arCOG04183 | COG1998 |
| CDS  | CSUB_C0438 | - | 421425 | 421724 | small subunit ribosomal protein S24e                                | J | 99  | arCOG04182 | COG2004 |
| CDS  | CSUB_C0439 | - | 421702 | 422127 | small subunit ribosomal protein S6e                                 | J | 141 | arCOG01946 | COG2125 |
| CDS  | CSUB_C0440 | - | 422167 | 424413 | translation initiation factor IF-2 unclassified subunit             | J | 748 | arCOG01560 | COG0532 |
| CDS  | CSUB_C0441 | + | 424474 | 425454 | O-sialoglycoprotein endopeptidase                                   | L | 326 | arCOG01183 | COG0533 |
| CDS  | CSUB_C0442 | + | 425439 | 426083 | Mn2+-dependent serine/threonine protein kinase                      | T | 214 | arCOG01185 | COG3642 |
| CDS  | CSUB_C0443 | + | 426070 | 426648 | nucleoside-triphosphatase                                           | F | 192 | arCOG04184 | COG0127 |
| CDS  | CSUB_C0444 | + | 426653 | 427087 | small subunit ribosomal protein S15                                 | J | 144 | arCOG04185 | COG0184 |
| CDS  | CSUB_C0445 | + | 427084 | 428550 | archaea-specific RecJ-like exonuclease                              | L | 488 | arCOG00427 | COG0608 |
| CDS  | CSUB_C0446 | + | 428528 | 428776 | hypothetical protein                                                | S | 82  |            |         |
| CDS  | CSUB_C0447 | + | 428803 | 429423 | small subunit ribosomal protein S3Ae                                | J | 206 | arCOG04186 | COG1890 |
| CDS  | CSUB_C0448 | + | 429424 | 429753 | conserved hypothetical protein                                      | S | 109 | arCOG05763 | COG4003 |
| CDS  | CSUB_C0449 | - | 429750 | 430958 | translation-associated GTPase                                       | J | 402 | arCOG00357 | COG0012 |
| CDS  | CSUB_C0450 | - | 430961 | 431392 | large subunit ribosomal protein L15e                                | J | 143 | arCOG04209 | COG1632 |
| CDS  | CSUB_C0451 | + | 431467 | 431868 | conserved hypothetical protein                                      | J | 133 | arCOG01042 | COG1325 |
| CDS  | CSUB_C0452 | + | 431850 | 432461 | hypothetical protein                                                | J | 203 | arCOG00307 | COG1603 |
| CDS  | CSUB_C0453 | + | 432451 | 432759 | hypothetical protein                                                | J | 102 | arCOG01365 | COG1369 |
| CDS  | CSUB_C0454 | + | 432744 | 433415 | conserved hypothetical protein                                      | R | 223 | arCOG02766 | COG1266 |
| CDS  | CSUB_C0455 | - | 433365 | 434228 | sec-independent protein translocase protein TatC                    | U | 287 | arCOG01919 | COG0805 |
| CDS  | CSUB_C0456 | - | 434266 | 434559 | sec-independent protein translocase protein TatA                    | U | 97  | arCOG02694 | COG1826 |
| CDS  | CSUB_C0457 | - | 434604 | 435374 | 3-oxoacyl-[acyl-carrier protein] reductase                          | I | 256 | arCOG01259 | COG1028 |
| CDS  | CSUB_C0458 | + | 435429 | 435914 | small subunit ribosomal protein S13                                 | J | 161 | arCOG01722 | COG0099 |
| CDS  | CSUB_C0459 | - | 435961 | 437031 | 5-methyltetrahydropteroylriglutamate-homocysteine methyltransferase | E | 356 | arCOG01876 | COG0620 |
| CDS  | CSUB_C0460 | - | 437028 | 437975 | methylcobalamin:homocysteine methyltransferase                      | E | 315 | arCOG01877 | COG0620 |
| CDS  | CSUB_C0461 | - | 437977 | 438987 | thioredoxin reductase (NADPH)                                       | O | 336 | arCOG01296 | COG0492 |
| CDS  | CSUB_C0462 | - | 439006 | 439998 | phosphate uptake regulator                                          | P | 330 | arCOG00318 | COG0704 |
| CDS  | CSUB_C0463 | + | 440088 | 440546 | large subunit ribosomal protein L22                                 | J | 152 | arCOG04098 | COG0091 |
| CDS  | CSUB_C0464 | + | 440543 | 441154 | small subunit ribosomal protein S3                                  | J | 203 | arCOG04097 | COG0092 |
| CDS  | CSUB_C0465 | + | 441135 | 441335 | large subunit ribosomal protein L29                                 | J | 66  | arCOG00785 | COG0255 |
| CDS  | CSUB_C0466 | + | 441332 | 441571 | ribonuclease P subunit P29                                          | A | 79  |            |         |
| CDS  | CSUB_C0467 | + | 441568 | 441897 | small subunit ribosomal protein S17                                 | J | 109 | arCOG04096 | COG0186 |
| CDS  | CSUB_C0468 | + | 441902 | 442336 | large subunit ribosomal protein L14                                 | J | 144 | arCOG04095 | COG0093 |
| CDS  | CSUB_C0469 | + | 442347 | 442706 | large subunit ribosomal protein L24                                 | J | 119 | arCOG04094 | COG0198 |
| CDS  | CSUB_C0470 | + | 442703 | 443419 | small subunit ribosomal protein S4e                                 | J | 238 | arCOG04093 | COG1471 |
| CDS  | CSUB_C0471 | + | 443401 | 443925 | large subunit ribosomal protein L5                                  | J | 174 | arCOG04092 | COG0094 |
| CDS  | CSUB_C0472 | + | 443922 | 444083 | small subunit ribosomal protein S14                                 | J | 53  | arCOG00782 | COG0199 |
| CDS  | CSUB_C0473 | + | 444095 | 444478 | small subunit ribosomal protein S8                                  | J | 127 | arCOG04091 | COG0096 |
| CDS  | CSUB_C0474 | + | 444468 | 445010 | large subunit ribosomal protein L6                                  | J | 180 | arCOG04090 | COG0097 |
| CDS  | CSUB_C0475 | + | 445003 | 445389 | large subunit ribosomal protein L32e                                | J | 128 | arCOG00781 | COG1717 |
| CDS  | CSUB_C0476 | + | 445392 | 445832 | large subunit ribosomal protein L19e                                | J | 146 | arCOG04089 | COG2147 |
| CDS  | CSUB_C0477 | + | 445829 | 446407 | large subunit ribosomal protein L18                                 | J | 192 | arCOG04088 | COG0256 |
| CDS  | CSUB_C0478 | + | 446400 | 447014 | small subunit ribosomal protein S5                                  | J | 204 | arCOG04087 | COG0098 |
| CDS  | CSUB_C0479 | + | 447017 | 447427 | large subunit ribosomal protein L30                                 | J | 136 | arCOG04086 | COG1841 |
| CDS  | CSUB_C0480 | + | 447482 | 447904 | large subunit ribosomal protein L15                                 | J | 140 | arCOG00779 | COG0200 |
| CDS  | CSUB_C0481 | + | 447901 | 449334 | preprotein translocase subunit SecY                                 | U | 477 | arCOG04169 | COG0201 |
| CDS  | CSUB_C0482 | + | 449336 | 449878 | hypothetical protein                                                | S | 180 | arCOG02673 | COG1422 |
| CDS  | CSUB_C0483 | - | 450034 | 450636 | cytidylate kinase                                                   | F | 200 | arCOG01037 | COG1102 |
| CDS  | CSUB_C0484 | + | 450700 | 451023 | large subunit ribosomal protein L14e                                | J | 107 | arCOG04167 | COG2163 |
| CDS  | CSUB_C0485 | + | 451270 | 451992 | conserved hypothetical protein                                      | J | 240 | arCOG00987 | COG0130 |
| tRNA | CSUB_T15   | + | 452026 | 452112 | tRNA-Ser                                                            |   |     |            |         |
| CDS  | CSUB_C0486 | + | 452200 | 452586 | signal-transduction protein                                         | G | 128 | arCOG00632 | COG0477 |
| CDS  | CSUB_C0487 | + | 452651 | 453607 | peptide/nickel ABC transporter ATPase subunit                       | E | 318 | arCOG00184 | COG4608 |
| CDS  | CSUB_C0488 | - | 453599 | 454279 | hypothetical protein                                                | S | 226 |            |         |
| CDS  | CSUB_C0489 | + | 454509 | 454751 | hypothetical protein                                                | S | 80  |            |         |
| CDS  | CSUB_C0490 | + | 454845 | 456566 | conserved hypothetical protein                                      | S | 573 | arCOG00372 |         |
| CDS  | CSUB_C0491 | + | 456563 | 459079 | peptide/nickel ABC transporter substrate-binding protein            | R | 838 | arCOG01672 | COG3889 |
| CDS  | CSUB_C0492 | - | 459076 | 459951 | hypothetical protein                                                | S | 291 |            |         |
| CDS  | CSUB_C0493 | - | 460000 | 461046 | peptide/nickel ABC transporter permease                             | E | 348 | arCOG00751 | COG0601 |
| CDS  | CSUB_C0494 | - | 461043 | 462008 | peptide/nickel ABC transporter ATP-binding protein                  | E | 321 | arCOG00181 | COG0444 |
| CDS  | CSUB_C0495 | - | 462011 | 463411 | peptide/nickel ABC transporter permease                             | E | 466 | arCOG00749 | COG1173 |
| CDS  | CSUB_C0496 | - | 463435 | 463755 | hypothetical protein                                                | S | 106 |            |         |
| CDS  | CSUB_C0497 | - | 463752 | 464891 | archaeal cell division control protein orc1/cdc6                    | L | 379 | arCOG00467 | COG1474 |
| CDS  | CSUB_C0498 | - | 464921 | 465187 | conserved hypothetical protein                                      | S | 88  |            |         |
| CDS  | CSUB_C0499 | - | 465513 | 465806 | hypothetical protein                                                | S | 97  |            |         |
| CDS  | CSUB_C0500 | + | 465900 | 467078 | FAD dependent oxidoreductase                                        | E | 392 | arCOG00755 | COG0665 |
| CDS  | CSUB_C0501 | + | 467835 | 468848 | hypothetical protein                                                | S | 337 |            |         |
| CDS  | CSUB_C0502 | + | 469516 | 470076 | conserved hypothetical protein                                      | I | 186 | arCOG04106 | COG0575 |
| CDS  | CSUB_C0503 | - | 470073 | 470528 | hypothetical protein                                                | S | 151 |            |         |
| CDS  | CSUB_C0504 | - | 470525 | 471832 | adenosylhomocysteinease                                             | H | 435 | arCOG04137 | COG0499 |
| CDS  | CSUB_C0505 | + | 471898 | 472332 | translation initiation factor eIF-2 beta subunit                    | J | 144 | arCOG01640 | COG1601 |
| CDS  | CSUB_C0506 | + | 472419 | 472706 | conserved hypothetical protein                                      | S | 95  | arCOG04051 | COG2412 |
| CDS  | CSUB_C0507 | + | 472716 | 473057 | conserved hypothetical protein                                      | R | 113 | arCOG01084 | COG1694 |
| CDS  | CSUB_C0508 | - | 473011 | 474309 | 3-hydroxy-3-methylglutaryl-CoA reductase                            | I | 432 | arCOG04260 | COG1257 |
| CDS  | CSUB_C0509 | - | 474334 | 474954 | conserved hypothetical protein                                      | S | 206 | arCOG02103 |         |
| CDS  | CSUB_C0510 | - | 474989 | 475897 | signal recognition particle receptor                                | U | 302 | arCOG01227 | COG0552 |
| CDS  | CSUB_C0511 | - | 475904 | 476344 | prefoldin subunit alpha                                             | O | 146 | arCOG01341 | COG1730 |
| CDS  | CSUB_C0512 | - | 476378 | 477046 | translation initiation factor eIF-6                                 | J | 222 | arCOG04176 | COG1976 |
| CDS  | CSUB_C0513 | - | 477058 | 477339 | large subunit ribosomal protein L31e                                | J | 93  | arCOG04473 | COG2097 |
| CDS  | CSUB_C0514 | - | 477430 | 478683 | conserved hypothetical protein                                      | S | 417 |            |         |
| CDS  | CSUB_C0515 | - | 478696 | 479562 | cyclase family protein                                              | E | 288 | arCOG02462 | COG1878 |
| CDS  | CSUB_C0516 | + | 479561 | 481111 | conserved hypothetical protein                                      | S | 516 |            |         |
| CDS  | CSUB_C0517 | + | 481108 | 481263 | hypothetical protein                                                | S | 51  |            |         |
| CDS  | CSUB_C0518 | - | 481246 | 482052 | hypothetical protein                                                | S | 268 |            |         |
| CDS  | CSUB_C0519 | + | 482116 | 482856 | hypothetical protein                                                | S | 246 |            |         |
| CDS  | CSUB_C0520 | + | 483002 | 485224 | molybdenum hydroxylase family protein, large subunit                | C | 740 | arCOG01167 | COG1529 |
| CDS  | CSUB_C0521 | - | 485274 | 486677 | propionyl-CoA carboxylase beta chain                                | I | 467 | arCOG02705 | COG4799 |
| CDS  | CSUB_C0522 | + | 486809 | 489172 | molybdenum hydroxylase family protein, large subunit                | C | 787 | arCOG01167 | COG1529 |
| CDS  | CSUB_C0523 | + | 489175 | 490044 | molybdenum hydroxylase family protein, medium subunit               | C | 289 | arCOG01926 | COG1319 |

|      |              |   |        |        |                                                                          |   |      |            |         |
|------|--------------|---|--------|--------|--------------------------------------------------------------------------|---|------|------------|---------|
| CDS  | CSUB_C0524   | + | 490034 | 490501 | molybdenum hydroxylase family protein, small subunit                     | C | 155  | arCOG01925 | COG2080 |
| CDS  | CSUB_C0525   | - | 490504 | 490833 | molybdopterin converting factor, small subunit                           | H | 109  | arCOG00536 | COG1977 |
| CDS  | CSUB_C0526   | + | 490896 | 492149 | cytosine deaminase                                                       | F | 417  | arCOG00697 | COG0402 |
| CDS  | CSUB_C0527   | + | 492183 | 493742 | sugar ABC transporter ATP-binding protein                                | R | 519  | arCOG00186 | COG3845 |
| CDS  | CSUB_C0528   | + | 493735 | 494811 | sugar ABC transporter permease                                           | R | 358  | arCOG00260 | COG4603 |
| CDS  | CSUB_C0529   | + | 494808 | 495701 | sugar ABC transporter permease                                           | R | 297  | arCOG00261 | COG1079 |
| CDS  | CSUB_C0530   | - | 495716 | 497125 | conserved hypothetical protein                                           | R | 469  | arCOG00257 | COG1744 |
| CDS  | CSUB_C0531   | + | 497405 | 498427 | basic membrane lipoprotein                                               | R | 340  | arCOG00257 | COG1744 |
| CDS  | CSUB_C0532   | + | 498452 | 499984 | sugar ABC transporter ATP-binding protein                                | R | 510  | arCOG00186 | COG3845 |
| CDS  | CSUB_C0533   | + | 499989 | 502136 | sugar ABC transporter permease                                           | R | 715  | arCOG00261 | COG1079 |
| CDS  | CSUB_C0534-1 | + | 502395 | 503435 | cytosine deaminase                                                       | F | 346  | arCOG00697 | COG0402 |
| tRNA | CSUB_T16     | - | 503442 | 503515 | tRNA-Thr                                                                 |   |      |            |         |
| CDS  | CSUB_C0535   | - | 503726 | 504592 | hypothetical protein                                                     | S | 288  |            |         |
| CDS  | CSUB_C0536   | - | 505177 | 506412 | glutamate dehydrogenase (NAD(P)+)                                        | E | 411  | arCOG01352 | COG0334 |
| CDS  | CSUB_C0537   | + | 506500 | 506937 | conserved hypothetical protein                                           | S | 145  | arCOG06027 | COG3189 |
| CDS  | CSUB_C0538   | + | 506972 | 507442 | conserved hypothetical protein                                           | S | 156  | arCOG00761 | COG1720 |
| CDS  | CSUB_C0539   | - | 507593 | 507994 | conserved hypothetical protein                                           | S | 133  | arCOG03427 | COG2510 |
| CDS  | CSUB_C0540   | - | 508073 | 509305 | conserved hypothetical protein                                           | S | 410  | arCOG04269 | COG1602 |
| CDS  | CSUB_C0541   | - | 509305 | 510906 | ATPase                                                                   | R | 533  | arCOG04116 | COG1855 |
| tRNA | CSUB_T17     | - | 510882 | 510997 | tRNA-Leu                                                                 |   |      |            |         |
| CDS  | CSUB_C0542   | + | 511314 | 511721 | conserved hypothetical protein                                           | J | 135  | arCOG00985 | COG2016 |
| CDS  | CSUB_C0543   | + | 511759 | 512832 | ATP-binding protein involved in chromosome partitioning                  | D | 357  | arCOG00585 | COG0489 |
| CDS  | CSUB_C0544   | - | 512996 | 514159 | conserved hypothetical protein                                           | R | 387  | arCOG00601 | COG0517 |
| CDS  | CSUB_C0545   | + | 514334 | 514981 | conserved hypothetical protein                                           | S | 215  | arCOG03794 | COG3601 |
| CDS  | CSUB_C0546   | - | 514959 | 515972 | Zn-dependent alcohol dehydrogenases                                      | E | 337  | arCOG01459 | COG1063 |
| CDS  | CSUB_C0547   | - | 516334 | 516711 | acylphosphatase                                                          | C | 125  | arCOG01674 | COG1254 |
| tRNA | CSUB_T18     | - | 516756 | 516853 | tRNA-Ser                                                                 |   |      |            |         |
| CDS  | CSUB_C0548   | - | 516880 | 517716 | conserved hypothetical protein                                           | S | 278  | arCOG04069 | COG2106 |
| CDS  | CSUB_C0549   | - | 517759 | 518181 | conserved hypothetical protein                                           | R | 140  | arCOG04055 | COG1371 |
| CDS  | CSUB_C0550   | + | 518266 | 518634 | conserved hypothetical protein                                           | S | 122  | arCOG01191 | COG2250 |
| CDS  | CSUB_C0551   | + | 518631 | 518966 | conserved hypothetical protein                                           | R | 111  | arCOG01205 | COG1708 |
| CDS  | CSUB_C0552   | - | 518963 | 520021 | hypothetical protein                                                     | S | 352  |            |         |
| CDS  | CSUB_C0553   | - | 520156 | 527916 | hypothetical protein                                                     | S | 2586 |            |         |
| CDS  | CSUB_C0554   | - | 528713 | 529165 | conserved hypothetical protein                                           | V | 150  | arCOG00727 | COG4113 |
| CDS  | CSUB_C0555   | - | 529135 | 529377 | conserved hypothetical protein                                           | S | 80   | arCOG02218 |         |
| CDS  | CSUB_C0556   | + | 530151 | 530375 | hypothetical protein                                                     | K | 74   | arCOG02681 | COG1753 |
| CDS  | CSUB_C0557   | + | 530376 | 530768 | conserved hypothetical protein                                           | V | 130  | arCOG02219 | COG1487 |
| CDS  | CSUB_C0558   | - | 531117 | 532208 | hypothetical protein                                                     | S | 363  |            |         |
| CDS  | CSUB_C0559   | - | 532205 | 533401 | site-specific DNA-methyltransferase (adenine-specific)                   | L | 398  | arCOG00890 | COG0863 |
| CDS  | CSUB_C0560   | + | 533583 | 534155 | phosphoribosyl transferase domain protein                                | F | 190  | arCOG00031 | COG0503 |
| tRNA | CSUB_T19     | + | 534190 | 534304 | tRNA-Gln                                                                 |   |      |            |         |
| CDS  | CSUB_C0561   | + | 534667 | 534948 | hypothetical protein                                                     | S | 93   |            |         |
| CDS  | CSUB_C0562   | + | 534945 | 535160 | PIIT protein domain protein                                              | R | 71   |            |         |
| CDS  | CSUB_C0563   | - | 535174 | 536136 | 2-dehydro-3-deoxygluconokinase                                           | G | 320  | arCOG00014 | COG0524 |
| CDS  | CSUB_C0564   | - | 536139 | 537026 | dihydrodipicolinate synthetase                                           | E | 295  | arCOG04172 | COG0329 |
| CDS  | CSUB_C0565   | + | 537219 | 537995 | 3-oxoacyl-[acyl-carrier protein] reductase                               | I | 258  | arCOG01259 | COG1028 |
| CDS  | CSUB_C0566   | + | 537996 | 539285 | conserved hypothetical protein                                           | E | 429  | arCOG01107 | COG0624 |
| CDS  | CSUB_C0567   | + | 539288 | 541627 | molybdenum hydroxylase family protein, large subunit                     | C | 779  | arCOG01167 | COG1529 |
| CDS  | CSUB_C0568   | + | 541684 | 542874 | conserved hypothetical protein                                           | E | 396  |            |         |
| CDS  | CSUB_C0569   | + | 542871 | 543659 | orotidine-5'-phosphate decarboxylase                                     | F | 262  | arCOG00081 | COG0284 |
| CDS  | CSUB_C0570   | + | 543687 | 545264 | 1-pyrroline-5-carboxylate dehydrogenase                                  | C | 525  | arCOG01252 | COG1012 |
| CDS  | CSUB_C0571   | + | 545328 | 546329 | coenzyme F420-dependent N5,N10-methylenetetrahydrodipicolinate reductase | C | 333  | arCOG02410 | COG2141 |
| CDS  | CSUB_C0572   | + | 546363 | 547610 | branched-chain amino acid ABC transporter substrate-binding protein      | E | 415  | arCOG01020 | COG0683 |
| CDS  | CSUB_C0573   | + | 547611 | 548465 | branched-chain amino acid ABC transporter permease                       | E | 284  | arCOG01270 | COG0559 |
| CDS  | CSUB_C0574   | + | 548452 | 549399 | branched-chain amino acid ABC transporter permease                       | E | 315  | arCOG01274 | COG4177 |
| CDS  | CSUB_C0575   | - | 549400 | 550095 | branched-chain amino acid ABC transporter ATP-binding protein            | E | 231  | arCOG00924 | COG0410 |
| CDS  | CSUB_C0576   | - | 550082 | 550840 | neutral amino acid ABC transporter ATP-binding protein                   | E | 252  | arCOG00925 | COG0411 |
| CDS  | CSUB_C0577   | + | 550985 | 551371 | conserved hypothetical protein                                           | S | 128  | arCOG01191 | COG2250 |
| CDS  | CSUB_C0578   | + | 551355 | 551675 | DNA polymerase beta domain protein region                                | R | 106  | arCOG01205 | COG1708 |
| CDS  | CSUB_C0579   | + | 552778 | 552945 | hypothetical protein                                                     | S | 55   |            |         |
| CDS  | CSUB_C0580   | + | 552945 | 553208 | conserved hypothetical protein                                           | K | 87   | arCOG01665 | COG2026 |
| tRNA | CSUB_T20     | - | 553233 | 553305 | tRNA-Gln                                                                 |   |      |            |         |
| CDS  | CSUB_C0581   | - | 553331 | 553633 | conserved hypothetical protein                                           | S | 100  | arCOG04140 | COG1888 |
| CDS  | CSUB_C0582   | + | 553854 | 555332 | phytoene dehydrogenase                                                   | Q | 492  | arCOG01521 | COG1233 |
| CDS  | CSUB_C0583   | + | 555333 | 556217 | phytoene synthase                                                        | I | 294  | arCOG02936 | COG1562 |
| CDS  | CSUB_C0584   | + | 556208 | 557074 | UbiA prenyltransferase                                                   | H | 288  | arCOG00478 | COG0382 |
| CDS  | CSUB_C0585   | + | 557084 | 557611 | conserved hypothetical protein                                           | S | 175  | arCOG05626 |         |
| CDS  | CSUB_C0586   | - | 557606 | 558094 | conserved hypothetical protein                                           | S | 162  | arCOG04298 | COG1839 |
| CDS  | CSUB_C0587   | - | 558127 | 559191 | octaprenyl-diphosphate synthase                                          | H | 354  | arCOG01726 | COG0142 |
| CDS  | CSUB_C0588   | - | 559227 | 560000 | NADPH-flavin oxidoreductase                                              | C | 257  | arCOG00288 | COG0778 |
| CDS  | CSUB_C0589   | - | 560037 | 561122 | cell division protein FtsZ                                               | D | 361  | arCOG02201 | COG0206 |
| CDS  | CSUB_C0590   | - | 561115 | 561423 | conserved hypothetical protein                                           | S | 102  |            |         |
| CDS  | CSUB_C0591   | + | 561456 | 561824 | conserved hypothetical protein                                           | L | 122  | arCOG01486 | COG1658 |
| CDS  | CSUB_C0592   | - | 561821 | 563866 | glutamine amidotransferase class-II domain protein                       | E | 681  | arCOG00095 | COG0067 |
| CDS  | CSUB_C0593   | - | 563863 | 564813 | glutamate synthase (NADPH/NADH) large chain                              | E | 316  | arCOG00619 | COG0069 |
| CDS  | CSUB_C0594-1 | - | 564806 | 566041 | glutamate synthase (NADPH/NADH) large chain                              | E | 411  | arCOG00619 | COG0069 |
| CDS  | CSUB_C0595   | + | 566217 | 567044 | conserved hypothetical protein                                           | R | 275  | arCOG02050 | COG0730 |
| CDS  | CSUB_C0596   | + | 567065 | 567397 | hypothetical protein                                                     | S | 110  |            |         |
| CDS  | CSUB_C0597   | + | 567434 | 568291 | Rieske (2Fe-2S) domain-containing protein                                | C | 285  | arCOG01720 | COG0723 |
| tRNA | CSUB_T21     | + | 568325 | 568409 | tRNA-Leu                                                                 |   |      |            |         |
| CDS  | CSUB_C0598   | - | 568391 | 569032 | hypothetical protein                                                     | S | 213  |            |         |
| CDS  | CSUB_C0599   | - | 569035 | 570012 | DNA methylase N-4/N-6                                                    | L | 325  | arCOG00129 | COG0863 |
| CDS  | CSUB_C0600   | - | 570074 | 570355 | thioredoxin                                                              | V | 93   |            |         |
| CDS  | CSUB_C0601   | - | 570381 | 571013 | conserved hypothetical protein                                           | S | 210  | arCOG03119 |         |
| CDS  | CSUB_C0602   | + | 571069 | 572421 | hydroxypyruvate reductase                                                | G | 450  | arCOG04170 | COG2379 |
| CDS  | CSUB_C0603   | - | 572414 | 573451 | deoxyhypusine synthase                                                   | O | 345  | arCOG04142 | COG1899 |
| CDS  | CSUB_C0604   | - | 573474 | 574028 | oxidoreductase                                                           | R | 184  | arCOG02431 | COG1611 |
| CDS  | CSUB_C0605   | - | 574363 | 577890 | reverse gyrase                                                           | L | 1175 | arCOG01526 | COG1110 |
| CDS  | CSUB_C0606   | - | 578169 | 579596 | 3-isopropylmalate/(R)-2-methylmalate dehydratase large subunit           | E | 475  | arCOG01698 | COG0065 |
| CDS  | CSUB_C0607   | - | 579627 | 580436 | conserved hypothetical protein                                           | R | 269  |            |         |
| CDS  | CSUB_C0608   | + | 580545 | 581492 | hypothetical protein                                                     | S | 315  |            |         |
| CDS  | CSUB_C0609   | + | 581511 | 582968 | ABC transporter ATP-binding protein                                      | R | 485  |            |         |
| CDS  | CSUB_C0610   | + | 582974 | 583354 | hypothetical protein                                                     | S | 126  |            |         |
| CDS  | CSUB_C0611   | - | 583425 | 583844 | hypothetical protein                                                     | S | 139  |            |         |
| CDS  | CSUB_C0612   | - | 583841 | 584977 | hypothetical protein                                                     | S | 378  |            |         |
| CDS  | CSUB_C0613   | + | 584976 | 585227 | hypothetical protein                                                     | S | 83   |            |         |
| CDS  | CSUB_C0614   | + | 585243 | 585872 | phage head maturation protease                                           | R | 209  |            |         |
| CDS  | CSUB_C0615   | + | 585877 | 586827 | hypothetical protein                                                     | S | 316  |            |         |
| CDS  | CSUB_C0616   | + | 586866 | 587687 | hypothetical protein                                                     | S | 273  |            |         |
| CDS  | CSUB_C0617   | + | 587684 | 588052 | hypothetical protein                                                     | S | 122  |            |         |
| CDS  | CSUB_C0618   | + | 588285 | 589208 | serine protease                                                          | O | 307  | arCOG00702 | COG1404 |
| CDS  | CSUB_C0619   | + | 589231 | 590121 | hypothetical protein                                                     | S | 296  |            |         |
| CDS  | CSUB_C0620   | + | 590126 | 590482 | hypothetical protein                                                     | R | 118  |            |         |
| CDS  | CSUB_C0621   | + | 590628 | 590951 | phage-related protein                                                    | S | 107  |            |         |
| CDS  | CSUB_C0622   | + | 590987 | 591550 | nuclease                                                                 | L | 187  | arCOG03193 | COG1525 |
| CDS  | CSUB_C0623   | + | 591817 | 594180 | conserved hypothetical protein                                           | S | 787  |            |         |
| CDS  | CSUB_C0624   | + | 594177 | 596042 | hypothetical protein                                                     | S | 621  |            |         |

|      |            |   |        |        |                                                          |   |     |            |         |
|------|------------|---|--------|--------|----------------------------------------------------------|---|-----|------------|---------|
| CDS  | CSUB_C0625 | + | 596039 | 596707 | hypothetical protein                                     | S | 222 |            |         |
| CDS  | CSUB_C0626 | + | 596720 | 597265 | hypothetical protein                                     | S | 181 |            |         |
| CDS  | CSUB_C0627 | + | 597237 | 597449 | hypothetical protein                                     | S | 70  |            |         |
| CDS  | CSUB_C0628 | + | 597433 | 598752 | prophage MuMc02, terminase, ATPase subunit               | R | 439 |            |         |
| CDS  | CSUB_C0629 | + | 599051 | 599896 | oxidoreductase                                           | R | 281 | arCOG01619 | COG0656 |
| CDS  | CSUB_C0630 | + | 599893 | 600765 | ABC-2 type transport system permease                     | V | 290 | arCOG01467 | COG0842 |
| CDS  | CSUB_C0631 | - | 600762 | 601760 | antibiotic ABC transporter ATP-binding protein           | V | 332 | arCOG00194 | COG1131 |
| CDS  | CSUB_C0632 | - | 601757 | 602281 | transcriptional regulator, PadR family                   | K | 174 | arCOG00002 | COG1695 |
| CDS  | CSUB_C0633 | + | 602477 | 602785 | conserved hypothetical protein                           | S | 102 | arCOG07723 |         |
| CDS  | CSUB_C0634 | - | 602864 | 603253 | conserved hypothetical protein                           | R | 129 | arCOG00516 | COG3467 |
| CDS  | CSUB_C0635 | + | 603513 | 605006 | conserved hypothetical protein                           | S | 497 |            |         |
| CDS  | CSUB_C0636 | - | 605003 | 605734 | nucleotidyl transferase                                  | M | 243 | arCOG00663 | COG1208 |
| CDS  | CSUB_C0637 | - | 605929 | 607140 | iron ABC transporter ATP-binding protein                 | P | 403 | arCOG00198 | COG1120 |
| CDS  | CSUB_C0638 | - | 607131 | 608132 | iron complex ABC transporter permease                    | P | 333 | arCOG01007 | COG0609 |
| CDS  | CSUB_C0639 | - | 608133 | 609371 | iron complex ABC transporter substrate-binding protein   | P | 412 | arCOG03417 | COG0614 |
| CDS  | CSUB_C0640 | + | 609443 | 610279 | molybdenum hydroxylase family protein, medium subunit    | C | 278 | arCOG01926 | COG1319 |
| CDS  | CSUB_C0641 | + | 610287 | 610742 | molybdenum hydroxylase family protein, small subunit     | C | 151 | arCOG01925 | COG2080 |
| CDS  | CSUB_C0642 | + | 610739 | 612094 | molybdenum hydroxylase family protein, large subunit     | C | 451 | arCOG01167 | COG1529 |
| CDS  | CSUB_C0643 | + | 612106 | 613116 | molybdenum hydroxylase family protein, large subunit     | C | 336 | arCOG01167 | COG1529 |
| CDS  | CSUB_C0644 | + | 613143 | 613955 | metal-dependent hydrolase                                | R | 270 | arCOG00497 | COG2220 |
| CDS  | CSUB_C0645 | + | 613955 | 614335 | conserved hypothetical protein                           | S | 126 |            |         |
| CDS  | CSUB_C0646 | - | 614332 | 614889 | hypothetical protein                                     | S | 185 |            |         |
| CDS  | CSUB_C0647 | - | 614896 | 615987 | maltooligosaccharide ABC transporter ATP-binding protein | G | 363 | arCOG00175 | COG3839 |
| CDS  | CSUB_C0648 | - | 615993 | 616256 | hypothetical protein                                     | S | 87  |            |         |
| CDS  | CSUB_C0649 | - | 616257 | 617339 | sugar ABC transporter ATP-binding protein                | G | 360 | arCOG00175 | COG3839 |
| CDS  | CSUB_C0650 | - | 617340 | 618248 | multiple sugar ABC transporter permease                  | G | 302 | arCOG00159 | COG0395 |
| CDS  | CSUB_C0651 | - | 618251 | 619126 | multiple sugar ABC transporter permease                  | G | 291 | arCOG00157 | COG1175 |
| CDS  | CSUB_C0652 | - | 619162 | 620838 | multiple sugar ABC transporter substrate-binding protein | G | 558 | arCOG00151 | COG1653 |
| CDS  | CSUB_C0653 | + | 620927 | 622405 | aldehyde dehydrogenase                                   | C | 492 | arCOG01252 | COG1012 |
| CDS  | CSUB_C0654 | - | 622380 | 623306 | fumarylacetoacetate (FAA) hydrolase                      | R | 308 | arCOG00236 | COG3970 |
| CDS  | CSUB_C0655 | - | 623313 | 624275 | NAD-dependent epimerase/dehydratase                      | M | 320 | arCOG04468 | COG0451 |
| CDS  | CSUB_C0656 | + | 624368 | 625123 | 2,4-dihydroxyhept-2-ene-1,7-dioic acid aldolase          | G | 251 | arCOG04974 | COG3836 |
| CDS  | CSUB_C0657 | + | 625177 | 625941 | hypothetical protein                                     | R | 254 | arCOG00348 | COG2047 |
| CDS  | CSUB_C0658 | - | 625954 | 626193 | hypothetical protein                                     | S | 79  |            |         |
| CDS  | CSUB_C0659 | - | 626270 | 628486 | hypothetical protein                                     | S | 738 |            |         |
| CDS  | CSUB_C0660 | - | 628557 | 630668 | conserved hypothetical protein                           | R | 703 | arCOG02044 | COG1287 |
| CDS  | CSUB_C0661 | + | 630794 | 632509 | hypothetical protein                                     | S | 571 |            |         |
| CDS  | CSUB_C0662 | - | 632598 | 632999 | translation initiation inhibitor                         | J | 133 | arCOG01630 | COG0251 |
| CDS  | CSUB_C0663 | - | 633023 | 634156 | conserved hypothetical protein                           | E | 377 | arCOG01000 | COG0006 |
| CDS  | CSUB_C0664 | - | 634240 | 635331 | maltooligosaccharide ABC transporter ATP-binding protein | G | 363 | arCOG00175 | COG3839 |
| CDS  | CSUB_C0665 | - | 635649 | 636524 | multiple sugar ABC transporter permease                  | G | 291 | arCOG00159 | COG0395 |
| CDS  | CSUB_C0666 | - | 636521 | 637387 | multiple sugar ABC transporter permease                  | G | 288 | arCOG00157 | COG1175 |
| CDS  | CSUB_C0667 | - | 637401 | 638924 | hypothetical protein                                     | S | 507 |            |         |
| CDS  | CSUB_C0668 | + | 639045 | 640145 | alanine racemase domain protein                          | M | 366 | arCOG06677 | COG0787 |
| CDS  | CSUB_C0669 | + | 640399 | 641397 | F420-dependent alcohol dehydrogenase                     | C | 332 | arCOG02410 | COG2141 |
| CDS  | CSUB_C0670 | + | 641456 | 642358 | conserved hypothetical protein                           | G | 300 | arCOG00271 | COG0697 |
| CDS  | CSUB_C0671 | - | 642369 | 643442 | N5,N10-methylenetetrahydromethanopterin reductase        | C | 357 | arCOG02410 | COG2141 |
| CDS  | CSUB_C0672 | - | 643467 | 645053 | thermosome alpha subunit                                 | O | 528 | arCOG01257 | COG0459 |
| CDS  | CSUB_C0673 | - | 645218 | 646516 | enolase                                                  | G | 432 | arCOG01169 | COG0148 |
| CDS  | CSUB_C0674 | - | 646566 | 647546 | aminoglycoside phosphotransferase                        | R | 326 |            |         |
| CDS  | CSUB_C0675 | - | 647557 | 648558 | oxidoreductase                                           | R | 333 | arCOG01622 | COG0673 |
| CDS  | CSUB_C0676 | - | 648688 | 649557 | conserved hypothetical protein                           | S | 289 |            |         |
| CDS  | CSUB_C0677 | + | 649772 | 650539 | creatinine amidohydrolase                                | R | 255 | arCOG04536 | COG1402 |
| CDS  | CSUB_C0678 | - | 650543 | 651577 | microsomal peptidase                                     | E | 344 | arCOG04083 | COG2355 |
| CDS  | CSUB_C0679 | + | 651763 | 653331 | hypothetical protein                                     | S | 522 |            |         |
| CDS  | CSUB_C0680 | + | 653341 | 654228 | multiple sugar ABC transporter permease                  | G | 295 | arCOG00157 | COG1175 |
| CDS  | CSUB_C0681 | + | 654225 | 655127 | multiple sugar ABC transporter permease                  | G | 300 | arCOG00159 | COG0395 |
| CDS  | CSUB_C0682 | - | 655131 | 656219 | maltooligosaccharide ABC transportor ATP-binding protein | G | 362 | arCOG00175 | COG3839 |
| CDS  | CSUB_C0683 | - | 656212 | 657306 | maltooligosaccharide ABC transporter ATP-binding protein | G | 364 | arCOG00175 | COG3839 |
| CDS  | CSUB_C0684 | - | 657350 | 658441 | oxidoreductase domain protein                            | R | 363 | arCOG01622 | COG0673 |
| CDS  | CSUB_C0685 | + | 658528 | 659547 | oxidoreductase domain protein                            | R | 339 | arCOG01622 | COG0673 |
| CDS  | CSUB_C0686 | + | 659544 | 660551 | oxidoreductase domain protein                            | R | 335 | arCOG01622 | COG0673 |
| CDS  | CSUB_C0687 | - | 660544 | 661203 | dimethylmenaquinone methyltransferase                    | H | 219 | arCOG00117 | COG0684 |
| CDS  | CSUB_C0688 | + | 661316 | 662293 | ornithine cyclodeaminase                                 | E | 325 | arCOG01035 | COG2423 |
| CDS  | CSUB_C0689 | + | 662457 | 662849 | hypothetical protein                                     | S | 130 |            |         |
| CDS  | CSUB_C0690 | - | 662838 | 663482 | DNA repair protein RadB                                  | L | 214 | arCOG00417 | COG0468 |
| CDS  | CSUB_C0691 | + | 663566 | 663874 | conserved hypothetical protein                           | S | 102 | arCOG00398 | COG2411 |
| tRNA | CSUB_T22   | + | 663904 | 663977 | tRNA-Gly                                                 |   |     |            |         |
| tRNA | CSUB_T23   | + | 664069 | 664183 | tRNA-Leu                                                 |   |     |            |         |
| CDS  | CSUB_C0692 | + | 664648 | 664896 | conserved hypothetical protein                           | O | 82  | arCOG02062 | COG0425 |
| CDS  | CSUB_C0693 | + | 664897 | 665319 | conserved hypothetical protein                           | R | 140 | arCOG02064 | COG2210 |
| CDS  | CSUB_C0694 | - | 665320 | 665760 | conserved hypothetical protein                           | S | 146 |            |         |
| CDS  | CSUB_C0695 | - | 665806 | 666756 | hypothetical protein                                     | S | 316 |            |         |
| CDS  | CSUB_C0696 | + | 666878 | 668191 | conserved hypothetical protein                           | S | 437 |            |         |
| CDS  | CSUB_C0697 | + | 668231 | 668800 | conserved hypothetical protein                           | R | 189 | arCOG04409 | COG2410 |
| CDS  | CSUB_C0698 | - | 668801 | 669826 | glyoxalase/bleomycin resistance protein/dioxygenase      | E | 341 | arCOG03101 | COG0346 |
| CDS  | CSUB_C0699 | - | 670282 | 670794 | hypothetical protein                                     | S | 170 |            |         |
| CDS  | CSUB_C0700 | - | 671215 | 673200 | hypothetical protein                                     | S | 661 |            |         |
| CDS  | CSUB_C0701 | - | 673531 | 674226 | hypothetical protein                                     | S | 231 |            |         |
| CDS  | CSUB_C0702 | - | 674833 | 675375 | thiamine S protein                                       | R | 180 |            |         |
| CDS  | CSUB_C0703 | - | 675430 | 675852 | conserved hypothetical protein                           | R | 140 | arCOG01138 | COG1310 |
| CDS  | CSUB_C0704 | - | 675849 | 676757 | cysteine synthase B                                      | E | 302 | arCOG01430 | COG0031 |
| CDS  | CSUB_C0705 | - | 676768 | 676983 | conserved hypothetical protein                           | S | 71  | arCOG07514 |         |
| CDS  | CSUB_C0706 | - | 677033 | 677641 | DNA-binding protein                                      | K | 202 | arCOG02271 | COG3413 |
| CDS  | CSUB_C0707 | + | 677735 | 679192 | nitrite reductase (NO-forming)                           | R | 485 |            |         |
| CDS  | CSUB_C0708 | + | 679189 | 679779 | electron transport protein SCO1/SenC                     | R | 196 | arCOG00313 | COG1999 |
| CDS  | CSUB_C0709 | - | 679870 | 680520 | hypothetical protein                                     | S | 216 |            |         |
| CDS  | CSUB_C0710 | - | 680748 | 681533 | hypothetical protein                                     | S | 261 | arCOG01466 |         |
| CDS  | CSUB_C0711 | - | 681520 | 682293 | ABC-2 type transport system permease                     | V | 257 | arCOG01465 | COG0842 |
| CDS  | CSUB_C0712 | - | 682290 | 683234 | ABC transporter ATP-binding protein                      | V | 314 | arCOG00194 | COG1131 |
| CDS  | CSUB_C0713 | - | 683282 | 683896 | HTH DNA binding domain protein                           | K | 204 | arCOG02271 | COG3413 |
| CDS  | CSUB_C0714 | + | 683987 | 685000 | copper-containing oxidoreductase                         | Q | 337 | arCOG03914 | COG2132 |
| CDS  | CSUB_C0715 | + | 685000 | 685434 | blue (type 1) copper domain protein                      | C | 144 | arCOG02926 | COG3794 |
| CDS  | CSUB_C0716 | + | 685431 | 686375 | hypothetical protein                                     | S | 314 |            |         |
| CDS  | CSUB_C0717 | - | 686347 | 686802 | hypothetical protein                                     | S | 151 |            |         |
| CDS  | CSUB_C0718 | + | 686896 | 687582 | conserved hypothetical protein                           | S | 228 | arCOG07057 |         |
| CDS  | CSUB_C0719 | + | 687583 | 687975 | conserved hypothetical protein                           | S | 130 |            |         |
| CDS  | CSUB_C0720 | + | 688001 | 688453 | conserved hypothetical protein                           | R | 150 | arCOG03913 | COG3019 |
| CDS  | CSUB_C0721 | + | 688607 | 689539 | hypothetical protein                                     | S | 310 |            |         |
| CDS  | CSUB_C0722 | + | 689563 | 689868 | hypothetical protein                                     | S | 101 |            |         |
| CDS  | CSUB_C0723 | - | 690377 | 691243 | hypothetical protein                                     | S | 288 |            |         |
| CDS  | CSUB_C0724 | + | 691435 | 691839 | hypothetical protein                                     | S | 134 |            |         |
| CDS  | CSUB_C0725 | + | 691945 | 692328 | conserved hypothetical protein                           | R | 127 | arCOG04217 | COG4900 |
| CDS  | CSUB_C0727 | + | 693741 | 694640 | conserved hypothetical protein                           | L | 299 | arCOG03156 | COG3780 |
| CDS  | CSUB_C0728 | + | 694977 | 695336 | conserved hypothetical protein                           | R | 119 | arCOG00578 | COG1645 |
| CDS  | CSUB_C0729 | + | 695926 | 697191 | archaeal cell division control protein orc1/cdc6         | L | 421 | arCOG00467 | COG1474 |
| CDS  | CSUB_C0730 | - | 697165 | 697788 | deoxyribonuclease V                                      | L | 207 | arCOG00929 | COG1515 |

|     |              |   |        |        |                                                                   |   |      |            |         |
|-----|--------------|---|--------|--------|-------------------------------------------------------------------|---|------|------------|---------|
| CDS | CSUB_C0731   | - | 697938 | 698450 | conserved hypothetical protein                                    | Q | 170  | arCOG03773 | COG0500 |
| CDS | CSUB_C0732   | + | 698486 | 699142 | conserved hypothetical protein                                    | R | 218  | arCOG04066 | COG2413 |
| CDS | CSUB_C0733   | + | 699157 | 700635 | inosine monophosphate dehydrogenase                               | F | 492  | arCOG00612 | COG0516 |
| CDS | CSUB_C0734   | + | 700632 | 701873 | adenylosuccinate synthase                                         | F | 413  | arCOG04387 | COG1014 |
| CDS | CSUB_C0735   | + | 701870 | 703234 | adenylosuccinate lyase                                            | F | 454  | arCOG01747 | COG0015 |
| CDS | CSUB_C0736   | - | 703215 | 704549 | zinc-dependent protease, TldD/PmbA family                         | R | 444  | arCOG00322 | COG0312 |
| CDS | CSUB_C0737   | + | 704634 | 706151 | hypothetical protein                                              | S | 505  |            |         |
| CDS | CSUB_C0738   | - | 706129 | 707154 | conserved hypothetical protein                                    | R | 341  | arCOG01831 | COG1665 |
| CDS | CSUB_C0739   | - | 707157 | 708056 | conserved hypothetical protein                                    | R | 299  | arCOG01831 | COG1665 |
| CDS | CSUB_C0740   | + | 708149 | 708709 | pyruvate ferredoxin oxidoreductase, gamma subunit                 | C | 186  | arCOG01603 | COG1014 |
| CDS | CSUB_C0741   | + | 708696 | 708956 | pyruvate ferredoxin oxidoreductase, delta subunit                 | C | 86   | arCOG01605 | COG1144 |
| CDS | CSUB_C0742   | + | 708956 | 710128 | pyruvate ferredoxin oxidoreductase, alpha subunit                 | C | 390  | arCOG01608 | COG0674 |
| CDS | CSUB_C0743   | + | 710125 | 711060 | pyruvate ferredoxin oxidoreductase, beta subunit                  | C | 311  | arCOG01601 | COG1013 |
| CDS | CSUB_C0744   | - | 711018 | 711401 | conserved hypothetical protein                                    | S | 127  | arCOG02994 | COG1917 |
| CDS | CSUB_C0745   | + | 711556 | 711915 | hypothetical protein                                              | S | 119  |            |         |
| CDS | CSUB_C0746   | + | 711921 | 712313 | hypothetical protein                                              | S | 130  |            |         |
| CDS | CSUB_C0747   | + | 712360 | 713646 | hydroxymethylpyrimidine transporter                               | F | 428  | arCOG03447 | COG1457 |
| CDS | CSUB_C0748   | - | 713696 | 714448 | DNA primase large subunit                                         | L | 250  | arCOG03013 | COG2219 |
| CDS | CSUB_C0749   | + | 715371 | 718463 | type II restriction enzyme, methylase subunit                     | V | 1030 | arCOG02635 | COG1002 |
| CDS | CSUB_C0750   | + | 718447 | 721500 | DNA/RNA helicase                                                  | K | 1017 | arCOG04818 | COG0553 |
| CDS | CSUB_C0751   | - | 722145 | 722543 | hypothetical protein                                              | S | 132  |            |         |
| CDS | CSUB_C0752   | - | 722558 | 723358 | hypothetical protein                                              | V | 266  | arCOG01935 | COG4006 |
| CDS | CSUB_C0753   | + | 724178 | 724357 | hypothetical protein                                              | S | 59   |            |         |
| CDS | CSUB_C0754   | + | 724354 | 725112 | hypothetical protein                                              | S | 252  |            |         |
| CDS | CSUB_C0755   | - | 725258 | 726892 | hypothetical protein                                              | S | 544  |            |         |
| CDS | CSUB_C0756   | - | 727696 | 728319 | hypothetical protein                                              | S | 207  |            |         |
| CDS | CSUB_C0757   | - | 728853 | 729050 | hypothetical protein                                              | S | 65   |            |         |
| CDS | CSUB_C0758   | + | 729250 | 729654 | conserved hypothetical protein                                    | S | 134  |            |         |
| CDS | CSUB_C0759   | + | 729699 | 730571 | protoheme IX farnesyltransferase                                  | O | 290  | arCOG00479 | COG0109 |
| CDS | CSUB_C0760   | - | 730568 | 731893 | dihydroorotase                                                    | F | 441  | arCOG00689 | COG0044 |
| CDS | CSUB_C0761   | + | 731932 | 734244 | molybdenum hydroxylase family protein, large subunit              | C | 770  | arCOG01167 | COG1529 |
| CDS | CSUB_C0762   | + | 734252 | 736546 | molybdenum hydroxylase family protein, large subunit              | C | 764  | arCOG01167 | COG1529 |
| CDS | CSUB_C0763   | + | 736578 | 737615 | isocitrate dehydrogenase                                          | C | 345  | arCOG01163 | COG0473 |
| CDS | CSUB_C0764   | + | 737906 | 739621 | succinate dehydrogenase flavoprotein subunit                      | C | 571  | arCOG00571 | COG1053 |
| CDS | CSUB_C0765   | + | 739626 | 740096 | succinate dehydrogenase cytochrome b-556 subunit                  | C | 156  | arCOG02244 | COG2009 |
| CDS | CSUB_C0766   | + | 740093 | 740446 | succinate dehydrogenase subunit                                   | C | 117  | arCOG00462 | COG2142 |
| CDS | CSUB_C0767   | + | 740458 | 741171 | succinate dehydrogenase iron-sulfur protein                       | C | 237  | arCOG00962 | COG0479 |
| CDS | CSUB_C0768   | + | 741175 | 742098 | hypothetical protein                                              | S | 307  |            |         |
| CDS | CSUB_C0769   | - | 742073 | 742585 | phosphopantetheine adenylyltransferase                            | F | 170  | arCOG01221 | COG1986 |
| CDS | CSUB_C0770   | + | 742855 | 743169 | hypothetical protein                                              | S | 104  |            |         |
| CDS | CSUB_C0771   | + | 743298 | 744116 | hypothetical protein                                              | S | 272  |            |         |
| CDS | CSUB_C0772   | + | 744167 | 745039 | conserved hypothetical protein                                    | K | 290  | arCOG00381 |         |
| CDS | CSUB_C0773   | - | 745047 | 746315 | actin/actin family protein                                        | R | 422  | arCOG05583 | COG5277 |
| CDS | CSUB_C0774   | - | 746348 | 746914 | hypothetical protein                                              | S | 188  |            |         |
| CDS | CSUB_C0775   | - | 747019 | 747948 | conserved hypothetical protein                                    | M | 309  | arCOG01568 | COG0668 |
| CDS | CSUB_C0776   | + | 747975 | 748595 | conserved hypothetical protein                                    | S | 206  | arCOG01091 | COG1814 |
| CDS | CSUB_C0777   | - | 748585 | 749622 | methylthioribose-1-phosphate isomerase                            | J | 345  | arCOG01123 | COG0182 |
| CDS | CSUB_C0778   | + | 749694 | 750836 | FAD-dependent pyridine nucleotide-disulphide oxidoreductase       | R | 380  | arCOG01064 | COG0446 |
| CDS | CSUB_C0779   | - | 750838 | 753567 | aconitate hydratase                                               | C | 909  | arCOG01697 | COG1048 |
| CDS | CSUB_C0780   | + | 753664 | 755907 | hypothetical protein                                              | S | 747  |            |         |
| CDS | CSUB_C0781   | - | 755904 | 758054 | hypothetical protein                                              | K | 716  |            |         |
| CDS | CSUB_C0782   | - | 758107 | 758433 | conserved hypothetical protein                                    | K | 108  | arCOG01863 | COG1813 |
| CDS | CSUB_C0783   | - | 758449 | 759114 | ribosome biogenesis protein                                       | S | 221  | arCOG04122 | COG1756 |
| CDS | CSUB_C0784   | + | 759182 | 759511 | ribonuclease P subunit RPR2                                       | J | 109  | arCOG02410 | COG2023 |
| CDS | CSUB_C0785   | + | 759668 | 760099 | small subunit ribosomal protein S19e                              | J | 143  | arCOG01344 | COG2238 |
| CDS | CSUB_C0786   | - | 760329 | 760973 | phosphoribosyltransferase                                         | R | 214  | arCOG00041 | COG1926 |
| CDS | CSUB_C0787   | - | 761031 | 762668 | spermine synthase                                                 | E | 545  |            |         |
| CDS | CSUB_C0788   | + | 762751 | 762975 | DNA-directed RNA polymerase subunit P                             | K | 74   | arCOG04341 | COG1996 |
| CDS | CSUB_C0789   | + | 763275 | 764228 | resolvase related protein                                         | R | 317  |            |         |
| CDS | CSUB_C0790   | + | 764474 | 765217 | conserved hypothetical protein                                    | M | 247  | arCOG01568 | COG0668 |
| CDS | CSUB_C0791   | - | 765214 | 765897 | conserved hypothetical protein                                    | S | 227  |            |         |
| CDS | CSUB_C0792   | + | 766015 | 766263 | conserved hypothetical protein                                    | C | 82   | arCOG01706 | COG0508 |
| CDS | CSUB_C0793   | - | 766268 | 767266 | pyruvate dehydrogenase E1 component subunit beta                  | C | 332  | arCOG01052 | COG0022 |
| CDS | CSUB_C0794   | - | 767277 | 768260 | pyruvate dehydrogenase E1 component subunit alpha                 | C | 327  | arCOG01054 | COG1071 |
| CDS | CSUB_C0795   | - | 768420 | 769340 | UDP-glucose 4-epimerase                                           | M | 306  | arCOG01369 | COG0451 |
| CDS | CSUB_C0796   | - | 769327 | 770358 | glycosyl transferase family 1                                     | M | 343  | arCOG01403 | COG0438 |
| CDS | CSUB_C0797   | + | 770493 | 770708 | small subunit ribosomal protein S17e                              | J | 71   | arCOG01885 | COG1383 |
| CDS | CSUB_C0798   | - | 770691 | 771668 | conserved hypothetical protein                                    | S | 325  |            |         |
| CDS | CSUB_C0799   | + | 771707 | 772741 | flap endonuclease I                                               | L | 344  | arCOG04050 | COG0258 |
| CDS | CSUB_C0800   | - | 772943 | 775123 | AAA family ATPase                                                 | O | 726  | arCOG01308 | COG0464 |
| CDS | CSUB_C0801   | + | 775258 | 775587 | ArsR family transcriptional regulator                             | K | 109  | arCOG01679 | COG0640 |
| CDS | CSUB_C0802   | + | 775655 | 776281 | conserved hypothetical protein                                    | S | 208  | arCOG03794 | COG3601 |
| CDS | CSUB_C0803   | + | 776350 | 777351 | DNA repair protein Rada                                           | L | 333  | arCOG00415 | COG0468 |
| CDS | CSUB_C0804   | - | 777354 | 778715 | pyruvate kinase                                                   | G | 453  | arCOG04120 | COG0469 |
| CDS | CSUB_C0805   | - | 778712 | 779665 | 3-hydroxybutyryl-CoA dehydrogenase                                | I | 317  | arCOG00249 | COG1250 |
| CDS | CSUB_C0806   | + | 779733 | 780611 | F420-dependent N5,N10-methylenetetrahydromethanopterin reductase  | C | 292  | arCOG02410 | COG2141 |
| CDS | CSUB_C0807   | - | 780608 | 781852 | ABC-2 type transport system permease                              | V | 414  | arCOG01463 | COG0842 |
| CDS | CSUB_C0808   | - | 781849 | 782799 | ABC transporter ATP-binding protein                               | V | 316  | arCOG00194 | COG1131 |
| CDS | CSUB_C0809   | + | 782842 | 783273 | conserved hypothetical protein                                    | S | 143  | arCOG01191 | COG2250 |
| CDS | CSUB_C0810   | + | 783270 | 783578 | DNA polymerase beta subunit                                       | R | 102  | arCOG01199 | COG1708 |
| CDS | CSUB_C0811-1 | + | 783678 | 783941 | hypothetical conserved protein                                    | S | 87   | arCOG01423 | COG5493 |
| CDS | CSUB_C0811-2 | + | 783914 | 784273 | hypothetical conserved protein                                    | S | 119  | arCOG01422 | COG5493 |
| CDS | CSUB_C0812   | + | 784281 | 784925 | 3-isopropylmalate/(R)-2-methylmalate dehydratase small subunit    | E | 214  | arCOG02230 | COG0066 |
| CDS | CSUB_C0813   | + | 784944 | 785408 | conserved hypothetical protein                                    | Q | 154  | arCOG01631 | COG0500 |
| CDS | CSUB_C0814   | - | 785405 | 786382 | ketol-acid reductoisomerase                                       | E | 325  | arCOG04465 | COG0059 |
| CDS | CSUB_C0815   | - | 786410 | 786649 | hypothetical protein                                              | S | 79   |            |         |
| CDS | CSUB_C0816   | - | 786646 | 788376 | acetolactate synthase I/II/III large subunit                      | E | 576  | arCOG01998 | COG0028 |
| CDS | CSUB_C0817   | - | 788373 | 789896 | 2-isopropylmalate synthase                                        | E | 507  | arCOG02092 | COG0119 |
| CDS | CSUB_C0818   | - | 790025 | 791587 | DNA topoisomerase VI subunit B                                    | L | 520  | arCOG01165 | COG1389 |
| CDS | CSUB_C0819   | - | 791621 | 792595 | AAA family ATPase                                                 | R | 324  | arCOG03169 | COG1672 |
| CDS | CSUB_C0820   | - | 792629 | 794029 | 6-phosphogluconate dehydrogenase                                  | G | 466  | arCOG00248 | COG1023 |
| CDS | CSUB_C0821   | - | 794068 | 794385 | transcriptional regulator, ArsR family                            | K | 105  | arCOG01680 | COG0640 |
| CDS | CSUB_C0822   | - | 794382 | 795575 | FAD-dependent pyridine nucleotide-disulphide oxidoreductase       | R | 397  | arCOG01064 | COG0446 |
| CDS | CSUB_C0823   | - | 795579 | 795824 | conserved hypothetical protein                                    | O | 81   | arCOG02062 | COG0425 |
| CDS | CSUB_C0824   | - | 795836 | 796336 | conserved hypothetical protein                                    | R | 166  | arCOG02064 | COG2210 |
| CDS | CSUB_C0825   | - | 796410 | 798029 | DNA topoisomerase IB                                              | L | 539  |            |         |
| CDS | CSUB_C0826   | - | 798131 | 798562 | nuclear ribonucleoprotein                                         | K | 143  | arCOG00999 | COG1958 |
| CDS | CSUB_C0827   | - | 798615 | 799919 | citrate transporter                                               | P | 434  | arCOG00238 | COG1055 |
| CDS | CSUB_C0828   | + | 799962 | 800918 | methyltransferase                                                 | J | 318  | arCOG00033 | COG2520 |
| CDS | CSUB_C0829   | - | 800897 | 801280 | hypothetical protein                                              | S | 127  |            |         |
| CDS | CSUB_C0830   | - | 801277 | 801789 | hypothetical protein                                              | S | 170  |            |         |
| CDS | CSUB_C0831   | + | 801807 | 803177 | histidinol dehydrogenase                                          | E | 456  | arCOG04352 | COG0141 |
| CDS | CSUB_C0832   | - | 803174 | 803737 | DNA-3-methyladenine glycosylase                                   | L | 187  | arCOG04295 | COG2094 |
| CDS | CSUB_C0833   | - | 803742 | 804344 | DNA polymerase bacteriophage-type                                 | L | 200  | arCOG00905 | COG1573 |
| CDS | CSUB_C0834   | + | 804405 | 804875 | peroxiredoxin Q/BCP                                               | O | 156  | arCOG00310 | COG1225 |
| CDS | CSUB_C0835   | - | 804841 | 805245 | sterol-binding domain protein                                     | I | 134  | arCOG01843 | COG3255 |
| CDS | CSUB_C0836   | + | 805279 | 805878 | CDP-diacylglycerol-glycerol-3-phosphate 3-phosphatidyltransferase | I | 199  | arCOG00670 | COG0558 |



|     |              |   |        |        |                                                                                              |   |     |            |         |
|-----|--------------|---|--------|--------|----------------------------------------------------------------------------------------------|---|-----|------------|---------|
| CDS | CSUB_C0837   | + | 805883 | 806350 | conserved hypothetical protein                                                               | S | 155 | arCOG00761 | COG1720 |
| CDS | CSUB_C0838   | - | 806335 | 806688 | hypothetical protein                                                                         | S | 117 |            |         |
| CDS | CSUB_C0839   | - | 806721 | 807143 | glycine cleavage system H protein                                                            | E | 140 | arCOG01303 | COG0509 |
| CDS | CSUB_C0840   | + | 807305 | 807502 | hypothetical protein                                                                         | S | 65  |            |         |
| CDS | CSUB_C0841   | + | 807581 | 808702 | acetylmethine deacetylase                                                                    | E | 373 | arCOG01107 | COG0624 |
| CDS | CSUB_C0842   | - | 808697 | 809356 | conserved hypothetical protein                                                               | S | 219 |            |         |
| CDS | CSUB_C0843   | + | 809593 | 810789 | glutamine- $\gamma$ -scyllo-inositol transaminase                                            | M | 398 | arCOG00118 | COG0399 |
| CDS | CSUB_C0844   | - | 810786 | 811343 | hypothetical protein                                                                         | S | 185 |            |         |
| CDS | CSUB_C0845   | - | 811357 | 811944 | transcriptional regulator, HxIR family                                                       | K | 195 | arCOG01057 | COG1733 |
| CDS | CSUB_C0846   | + | 812010 | 812633 | conserved hypothetical protein                                                               | T | 207 | arCOG04078 | COG2346 |
| CDS | CSUB_C0847   | - | 812638 | 812970 | conserved hypothetical protein                                                               | S | 110 | arCOG05529 |         |
| CDS | CSUB_C0848   | - | 813018 | 814310 | zinc-dependent protease, TldD/PmbA family                                                    | R | 430 | arCOG00321 | COG0312 |
| CDS | CSUB_C0849   | + | 814561 | 815064 | large subunit ribosomal protein L10e                                                         | J | 167 | arCOG04113 | COG0197 |
| CDS | CSUB_C0850   | + | 815069 | 815473 | ribonuclease HI                                                                              | L | 134 | arCOG02942 | COG0328 |
| CDS | CSUB_C0851   | + | 815672 | 816448 | pyruvate dehydrogenase E2 component (dihydropyruvate acetyltransferase)                      | C | 258 | arCOG01706 | COG0508 |
| CDS | CSUB_C0852   | + | 816473 | 817498 | 5-formaminoimidazole-4-carboxamide-1-( $\beta$ )-D-ribofuranosyl 5'-monophosphate synthetase | F | 341 | arCOG04346 | COG1759 |
| CDS | CSUB_C0853   | + | 817504 | 818496 | 5-formaminoimidazole-4-carboxamide-1-( $\beta$ )-D-ribofuranosyl 5'-monophosphate synthetase | F | 330 | arCOG04346 | COG1759 |
| CDS | CSUB_C0854   | + | 818523 | 820010 | conserved hypothetical protein                                                               | L | 495 | arCOG00282 | COG0433 |
| CDS | CSUB_C0855   | + | 819997 | 821277 | conserved hypothetical protein                                                               | S | 426 |            |         |
| CDS | CSUB_C0856   | - | 821274 | 823163 | glutamyl-tRNA(Gln) amidotransferase subunit E                                                | J | 629 | arCOG01719 | COG2511 |
| CDS | CSUB_C0857   | - | 823156 | 824511 | glutamyl-tRNA(Gln) amidotransferase subunit D                                                | E | 451 | arCOG01924 | COG0252 |
| CDS | CSUB_C0858   | - | 824565 | 824849 | conserved hypothetical protein                                                               | R | 94  | arCOG01208 | COG1708 |
| CDS | CSUB_C0859   | - | 824876 | 825556 | uridylylase kinase                                                                           | F | 226 | arCOG00858 | COG0528 |
| CDS | CSUB_C0860   | + | 825649 | 826035 | conserved hypothetical protein                                                               | S | 128 |            |         |
| CDS | CSUB_C0861   | + | 826044 | 826571 | conserved hypothetical protein                                                               | V | 175 | arCOG00717 | COG2405 |
| CDS | CSUB_C0862   | - | 826580 | 829255 | Ca <sup>2+</sup> -transporting ATPase                                                        | P | 891 | arCOG01578 | COG0474 |
| CDS | CSUB_C0863   | + | 829408 | 829635 | conserved hypothetical protein                                                               | K | 75  | arCOG02217 |         |
| CDS | CSUB_C0864   | + | 829622 | 830035 | conserved hypothetical protein                                                               | V | 137 | arCOG00726 | COG4113 |
| CDS | CSUB_C0865   | + | 830165 | 831430 | peptide chain release factor eRF subunit 1                                                   | J | 421 | arCOG01742 | COG1503 |
| CDS | CSUB_C0866   | + | 831432 | 831782 | hypothetical protein                                                                         | S | 116 |            |         |
| CDS | CSUB_C0867   | - | 831751 | 832494 | fructose-bisphosphate aldolase, class I                                                      | G | 247 | arCOG04044 | COG1830 |
| CDS | CSUB_C0868   | + | 832562 | 833698 | pyruvate formate-lyase activating enzyme                                                     | O | 378 | arCOG00936 | COG1180 |
| CDS | CSUB_C0869   | + | 833726 | 834424 | 2-haloacetal dehalogenase                                                                    | R | 232 | arCOG02291 | COG1011 |
| CDS | CSUB_C0870   | + | 834609 | 836153 | methionyl-tRNA synthetase                                                                    | J | 514 | arCOG00810 | COG0143 |
| CDS | CSUB_C0871   | - | 836147 | 836410 | hypothetical protein                                                                         | S | 87  |            |         |
| CDS | CSUB_C0872   | + | 836491 | 837210 | Biotin operon repressor BirA                                                                 | H | 239 | arCOG01940 | COG0340 |
| CDS | CSUB_C0873   | + | 837245 | 837958 | 5-methylthioadenosine phosphorylase                                                          | F | 237 | arCOG01324 | COG2820 |
| CDS | CSUB_C0874   | + | 838060 | 838881 | hypothetical protein                                                                         | S | 273 |            |         |
| CDS | CSUB_C0875   | - | 838899 | 839909 | simple sugar transporter permease                                                            | R | 336 | arCOG00261 | COG1079 |
| CDS | CSUB_C0876   | - | 839891 | 840967 | ABC transporter permease                                                                     | R | 358 | arCOG00260 | COG4603 |
| CDS | CSUB_C0877   | - | 840992 | 842479 | basic membrane protein A                                                                     | R | 495 | arCOG00258 | COG1744 |
| CDS | CSUB_C0878   | - | 842522 | 843361 | conserved hypothetical protein                                                               | R | 279 | arCOG01982 | COG0434 |
| CDS | CSUB_C0879   | - | 843393 | 844277 | ribokinase                                                                                   | G | 294 | arCOG00014 | COG0524 |
| CDS | CSUB_C0880   | + | 844355 | 844753 | cytidine deaminase                                                                           | F | 132 | arCOG04173 | COG0295 |
| CDS | CSUB_C0881   | + | 844767 | 845702 | inosine/uridine-preferring nucleoside hydrolase                                              | F | 311 | arCOG04558 | COG1957 |
| CDS | CSUB_C0882   | + | 845758 | 846447 | deoxyribose-phosphate aldolase                                                               | F | 229 | arCOG04320 | COG0274 |
| CDS | CSUB_C0883   | + | 846449 | 847372 | ribokinase                                                                                   | G | 307 | arCOG00014 | COG0524 |
| CDS | CSUB_C0884   | + | 847381 | 848199 | uridine phosphorylase                                                                        | F | 272 | arCOG01324 | COG2820 |
| CDS | CSUB_C0885   | - | 848176 | 848997 | conserved hypothetical protein                                                               | R | 273 | arCOG01982 | COG0434 |
| CDS | CSUB_C0886   | + | 849060 | 850595 | simple sugar ABC transporter ATP-binding protein                                             | R | 511 | arCOG00186 | COG3845 |
| CDS | CSUB_C0887   | + | 850635 | 851999 | 2-methylcitrate dehydratase                                                                  | R | 454 | arCOG04285 | COG2079 |
| CDS | CSUB_C0888   | + | 851996 | 853090 | citrate synthase                                                                             | C | 364 | arCOG04237 | COG0372 |
| CDS | CSUB_C0889   | - | 853087 | 854247 | tryptophanyl-tRNA synthetase                                                                 | J | 386 | arCOG01887 | COG0180 |
| CDS | CSUB_C0890   | - | 854512 | 855183 | sulfate ABC transporter ATP-binding protein                                                  | G | 223 | arCOG05705 | COG3839 |
| CDS | CSUB_C0891   | - | 855185 | 855880 | sulfate ABC transporter permease                                                             | O | 231 | arCOG00164 | COG0555 |
| CDS | CSUB_C0892   | - | 855887 | 856774 | conserved hypothetical protein                                                               | P | 295 | arCOG05704 | COG0725 |
| CDS | CSUB_C0893   | + | 856769 | 857317 | molybdate transport system regulatory protein                                                | R | 182 | arCOG00223 | COG2005 |
| CDS | CSUB_C0894   | + | 857591 | 858643 | aspartate-semialdehyde dehydrogenase                                                         | E | 350 | arCOG00494 | COG0136 |
| CDS | CSUB_C0895   | + | 858648 | 859436 | fructose-bisphosphate aldolase, class I                                                      | G | 262 | arCOG04044 | COG1830 |
| CDS | CSUB_C0896   | + | 859433 | 860434 | 3-dehydroquinase synthase                                                                    | E | 333 | arCOG04353 | COG1465 |
| CDS | CSUB_C0897   | + | 860431 | 861123 | 3-dehydroquinase dehydratase I                                                               | E | 230 | arCOG02097 | COG0710 |
| CDS | CSUB_C0898   | + | 861180 | 861962 | shikimate 5-dehydrogenase                                                                    | E | 260 | arCOG01033 | COG0169 |
| CDS | CSUB_C0899   | + | 861959 | 862822 | shikimate kinase                                                                             | E | 287 | arCOG01025 | COG1685 |
| CDS | CSUB_C0900   | + | 862803 | 864092 | 3-phosphoshikimate 1-carboxyvinyltransferase                                                 | E | 429 | arCOG04134 | COG0128 |
| CDS | CSUB_C0901   | + | 864115 | 864345 | hypothetical protein                                                                         | S | 76  |            |         |
| CDS | CSUB_C0902   | + | 864364 | 864861 | hypothetical protein                                                                         | S | 165 |            |         |
| CDS | CSUB_C0903   | + | 864923 | 865663 | conserved hypothetical protein                                                               | S | 246 |            |         |
| CDS | CSUB_C0904   | + | 865663 | 866583 | conserved hypothetical protein                                                               | R | 306 | arCOG04263 | COG1829 |
| CDS | CSUB_C0905   | - | 866590 | 867360 | conserved hypothetical protein                                                               | R | 256 | arCOG04303 | COG1634 |
| CDS | CSUB_C0906   | - | 867338 | 868231 | conserved hypothetical protein                                                               | S | 297 | arCOG04301 | COG1469 |
| CDS | CSUB_C0907   | + | 868315 | 870069 | ATP-dependent DNA ligase                                                                     | L | 584 | arCOG01347 | COG1793 |
| CDS | CSUB_C0908   | + | 870071 | 870298 | hypothetical protein                                                                         | S | 75  |            |         |
| CDS | CSUB_C0909   | - | 870528 | 871319 | transcriptional regulator, TmB-like                                                          | K | 263 | arCOG02037 | COG1378 |
| CDS | CSUB_C0910   | - | 871309 | 871821 | conserved hypothetical protein                                                               | S | 170 | arCOG07487 | COG4708 |
| CDS | CSUB_C0911   | - | 871887 | 873233 | hypothetical protein                                                                         | S | 448 |            |         |
| CDS | CSUB_C0912   | + | 873556 | 873760 | conserved hypothetical protein                                                               | S | 134 | arCOG01191 | COG2250 |
| CDS | CSUB_C0913   | + | 873744 | 874046 | conserved hypothetical protein                                                               | R | 100 | arCOG01205 | COG1708 |
| CDS | CSUB_C0914   | + | 874134 | 875828 | Fe-S oxidoreductase                                                                          | R | 564 | arCOG00933 | COG1964 |
| CDS | CSUB_C0915   | - | 875975 | 877108 | DNA repair protein RadA/Sms                                                                  | R | 377 |            |         |
| CDS | CSUB_C0916   | - | 877458 | 877727 | hypothetical protein                                                                         | S | 89  |            |         |
| CDS | CSUB_C0917   | - | 877763 | 879031 | hypothetical protein                                                                         | S | 422 |            |         |
| CDS | CSUB_C0918   | - | 879440 | 880456 | hypothetical protein                                                                         | S | 338 |            |         |
| CDS | CSUB_C0919   | + | 880553 | 881200 | hypothetical protein                                                                         | S | 215 |            |         |
| CDS | CSUB_C0920   | + | 881811 | 882035 | conserved hypothetical protein                                                               | K | 74  | arCOG02681 | COG1753 |
| CDS | CSUB_C0921   | + | 882162 | 882377 | hypothetical protein                                                                         | V | 71  | arCOG02219 | COG1487 |
| CDS | CSUB_C0922-1 | + | 883064 | 883474 | transposase                                                                                  | L | 136 | arCOG03585 | COG3547 |
| CDS | CSUB_C0923   | - | 884216 | 884578 | 4a-hydroxytetrahydrobiopterin dehydratase                                                    | H | 120 | arCOG02939 | COG2154 |
| CDS | CSUB_C0924-2 | - | 884685 | 884885 | transposase                                                                                  | L | 66  | arCOG02134 | COG3316 |
| CDS | CSUB_C0924-1 | - | 884857 | 885243 | transposase                                                                                  | L | 128 | arCOG02134 | COG3316 |
| CDS | CSUB_C0925   | + | 885407 | 886483 | anthranilate phosphoribosyltransferase                                                       | E | 358 | arCOG02012 | COG0547 |
| CDS | CSUB_C0926   | + | 886506 | 887204 | indole-3-glycerol-phosphate synthase                                                         | E | 232 | arCOG01088 | COG0134 |
| CDS | CSUB_C0927   | + | 887206 | 887829 | phosphoribosylanthranilate isomerase                                                         | E | 207 | arCOG01983 | COG0135 |
| CDS | CSUB_C0928   | + | 888210 | 889487 | tryptophan synthase beta subunit                                                             | R | 425 | arCOG01432 | COG1350 |
| CDS | CSUB_C0929   | - | 889477 | 890241 | tryptophan synthase alpha subunit                                                            | E | 254 | arCOG01086 | COG0159 |
| CDS | CSUB_C0930   | + | 890825 | 892486 | conserved hypothetical protein                                                               | S | 553 |            |         |
| CDS | CSUB_C0931   | + | 893244 | 893510 | conserved hypothetical protein                                                               | S | 88  |            |         |
| CDS | CSUB_C0932   | + | 893491 | 893871 | conserved hypothetical protein                                                               | V | 126 | arCOG05297 | COG2402 |
| CDS | CSUB_C0933   | - | 894473 | 896317 | conserved hypothetical protein                                                               | S | 614 |            |         |
| CDS | CSUB_C0934   | + | 898062 | 898811 | conserved hypothetical protein                                                               | S | 249 | arCOG03847 |         |
| CDS | CSUB_C0935   | - | 899738 | 901801 | hypothetical protein                                                                         | S | 687 |            |         |
| CDS | CSUB_C0936   | - | 902367 | 902762 | hypothetical protein                                                                         | S | 131 |            |         |
| CDS | CSUB_C0937   | - | 903185 | 904177 | DNA primase large subunit                                                                    | L | 330 | arCOG03013 | COG2219 |
| CDS | CSUB_C0938-2 | - | 904639 | 905217 | DNA excision repair protein ERCC-2                                                           | K | 192 | arCOG00770 | COG1199 |
| CDS | CSUB_C0938-1 | - | 905270 | 906361 | DNA excision repair protein ERCC-2                                                           | K | 363 | arCOG00770 | COG1199 |
| CDS | CSUB_C0939   | - | 906384 | 907787 | conserved hypothetical protein                                                               | R | 467 |            |         |
| CDS | CSUB_C0940   | - | 907849 | 908112 | hypothetical protein                                                                         | S | 87  |            |         |
| CDS | CSUB_C0941   | - | 908333 | 909094 | hypothetical protein                                                                         | S | 253 |            |         |

|     |              |   |         |         |                                                                        |   |     |            |         |
|-----|--------------|---|---------|---------|------------------------------------------------------------------------|---|-----|------------|---------|
| CDS | CSUB_C0942   | + | 910576  | 911082  | hypothetical protein                                                   | S | 168 |            |         |
| CDS | CSUB_C0943   | - | 911487  | 913763  | exonuclease SbcC                                                       | L | 758 | arCOG00368 | COG0419 |
| CDS | CSUB_C0944   | - | 913760  | 914893  | metallopheoesterase                                                    | L | 377 | arCOG00397 | COG0420 |
| CDS | CSUB_C0945   | - | 914890  | 916380  | conserved hypothetical protein                                         | L | 496 | arCOG00280 | COG0433 |
| CDS | CSUB_C0946   | - | 916377  | 917249  | conserved hypothetical protein                                         | S | 290 |            |         |
| CDS | CSUB_C0947-1 | + | 917712  | 917903  | transposase, IS4 family                                                | L | 63  | arCOG02754 | COG3039 |
| CDS | CSUB_C0948   | + | 918014  | 918505  | hypothetical protein                                                   | S | 163 |            |         |
| CDS | CSUB_C0949   | + | 918516  | 918851  | hypothetical protein                                                   | S | 111 |            |         |
| CDS | CSUB_C0950   | + | 919367  | 920194  | hypothetical protein                                                   | S | 275 |            |         |
| CDS | CSUB_C0951   | - | 920975  | 923059  | ERCC4-like helicase                                                    | L | 694 | arCOG00872 | COG1111 |
| CDS | CSUB_C0952   | + | 923366  | 923656  | conserved hypothetical protein                                         | L | 96  | arCOG00919 | COG1591 |
| CDS | CSUB_C0953   | - | 923718  | 924035  | conserved hypothetical protein                                         | S | 105 |            |         |
| CDS | CSUB_C0954   | - | 924068  | 924562  | conserved hypothetical protein                                         | S | 164 | arCOG01644 | COG2245 |
| CDS | CSUB_C0955   | - | 925339  | 925956  | probable transcription initiation factor IIB                           | K | 205 | arCOG01981 | COG1405 |
| CDS | CSUB_C0956   | - | 926007  | 926432  | hypothetical protein                                                   | S | 141 |            |         |
| CDS | CSUB_C0957   | - | 926467  | 927948  | hypothetical protein                                                   | L | 493 | arCOG00280 | COG0433 |
| CDS | CSUB_C0958   | - | 927942  | 928889  | hypothetical protein                                                   | S | 315 |            |         |
| CDS | CSUB_C0959   | - | 928929  | 930455  | hypothetical protein                                                   | S | 508 |            |         |
| CDS | CSUB_C0960   | - | 930430  | 930813  | conserved hypothetical protein                                         | S | 127 | arCOG07603 |         |
| CDS | CSUB_C0961   | - | 930854  | 931159  | hypothetical protein                                                   | S | 101 |            |         |
| CDS | CSUB_C0962   | - | 931188  | 931661  | hypothetical protein                                                   | S | 157 |            |         |
| CDS | CSUB_C0963   | - | 931671  | 932147  | hypothetical protein                                                   | S | 158 | arCOG03777 |         |
| CDS | CSUB_C0964   | + | 932708  | 933094  | hypothetical protein                                                   | S | 128 |            |         |
| CDS | CSUB_C0965   | - | 933407  | 934204  | 1H-3-hydroxy-4-oxoquinoline 2,4-dioxygenase                            | R | 265 | arCOG01648 | COG0596 |
| CDS | CSUB_C0966   | + | 934346  | 934621  | conserved hypothetical protein                                         | S | 91  |            |         |
| CDS | CSUB_C0967   | + | 934582  | 935004  | conserved hypothetical protein                                         | V | 140 | arCOG00727 | COG4113 |
| CDS | CSUB_C0968   | - | 935080  | 935466  | hypothetical protein                                                   | E | 128 | arCOG01876 | COG0620 |
| CDS | CSUB_C0969   | - | 935471  | 935692  | hypothetical protein                                                   | O | 73  | arCOG03686 | COG1765 |
| CDS | CSUB_C0970   | + | 935988  | 936374  | HEPN domain-containing protein                                         | S | 128 | arCOG01191 | COG2250 |
| CDS | CSUB_C0971   | + | 936364  | 936792  | DNA polymerase beta domain protein                                     | R | 142 | arCOG01204 | COG1708 |
| CDS | CSUB_C0972   | + | 937404  | 939326  | D-alanine-D-alanine ligase                                             | Q | 640 | arCOG01791 | COG0500 |
| CDS | CSUB_C0973   | - | 939407  | 939763  | DNA polymerase beta subunit                                            | R | 118 | arCOG01205 | COG1708 |
| CDS | CSUB_C0974   | - | 939738  | 940130  | HEPN domain-containing protein                                         | S | 130 | arCOG01191 | COG2250 |
| CDS | CSUB_C0975   | - | 940236  | 940916  | conserved hypothetical protein                                         | R | 226 | arCOG00036 | COG2102 |
| CDS | CSUB_C0976   | - | 941041  | 941640  | conserved hypothetical protein                                         | R | 199 | arCOG01506 | COG3381 |
| CDS | CSUB_C0977   | - | 941658  | 942647  | molybdopterin oxidoreductase subunit                                   | S | 329 |            |         |
| CDS | CSUB_C0978   | - | 942659  | 943813  | molybdopterin oxidoreductase Fe-S binding subunit                      | C | 384 | arCOG01501 | COG1140 |
| CDS | CSUB_C0979   | - | 943815  | 945938  | molybdopterin oxidoreductase molybdopterin binding subunit, C-terminal | C | 707 |            |         |
| CDS | CSUB_C0980   | - | 945952  | 947292  | molybdopterin oxidoreductase molybdopterin binding subunit, N-terminal | C | 446 | arCOG01497 | COG5013 |
| CDS | CSUB_C0981   | - | 947364  | 948041  | bacterio-opsin activator HTH domain protein                            | K | 225 | arCOG02279 | COG3413 |
| CDS | CSUB_C0982   | - | 948273  | 949793  | mercuric reductase                                                     | C | 506 | arCOG01068 | COG1249 |
| CDS | CSUB_C0983   | - | 949993  | 950379  | transcriptional regulator, HxIR family                                 | K | 128 | arCOG01057 | COG1733 |
| CDS | CSUB_C0984   | + | 950400  | 951818  | hypothetical protein                                                   | L | 472 | arCOG00367 | COG1630 |
| CDS | CSUB_C0985   | + | 951916  | 953403  | conserved hypothetical protein                                         | L | 495 | arCOG00280 | COG0433 |
| CDS | CSUB_C0986   | + | 953405  | 954556  | exonuclease SbcCD, D subunit                                           | L | 383 | arCOG00397 | COG0420 |
| CDS | CSUB_C0987   | + | 954550  | 956853  | exonuclease SbcCD, C subunit                                           | L | 767 | arCOG00368 | COG0419 |
| CDS | CSUB_C0988   | - | 956850  | 957569  | phosphohydrolase                                                       | S | 239 | arCOG01443 | COG2254 |
| CDS | CSUB_C0989   | - | 957550  | 959163  | CRISPR-associated helicase Cas3                                        | V | 537 | arCOG01444 | COG1203 |
| CDS | CSUB_C0990   | - | 959150  | 959812  | hypothetical protein                                                   | S | 220 |            |         |
| CDS | CSUB_C0991   | - | 959868  | 960329  | hypothetical protein                                                   | S | 153 |            |         |
| CDS | CSUB_C0992   | - | 960323  | 961081  | CRISPR-associated protein, Cas5 family                                 | V | 252 | arCOG02670 | COG1688 |
| CDS | CSUB_C0993   | - | 961078  | 962160  | CRISPR-associated autoregulator, DevR family                           | V | 360 | arCOG04192 | COG1857 |
| CDS | CSUB_C0994   | - | 962162  | 962557  | conserved hypothetical protein                                         | V | 131 | arCOG03823 |         |
| CDS | CSUB_C0995   | + | 962597  | 963253  | CRISPR-associated protein, Cas3 family                                 | K | 218 | arCOG01446 | COG0640 |
| CDS | CSUB_C0996   | + | 963269  | 964150  | CRISPR-associated protein                                              | V | 293 | arCOG01439 | COG5551 |
| CDS | CSUB_C0997   | + | 964147  | 965109  | CRISPR-associated protein Cas1                                         | V | 320 | arCOG01452 | COG1518 |
| CDS | CSUB_C0998   | + | 965114  | 965416  | CRISPR-associated protein Cas2                                         | V | 100 | arCOG04194 | COG1343 |
| CDS | CSUB_C0999   | + | 965413  | 966009  | CRISPR-associated protein Cas4                                         | V | 198 | arCOG00786 | COG1468 |
| CDS | CSUB_C1000   | - | 970004  | 970912  | CRISPR-associated RAMP family protein                                  | V | 302 | arCOG02658 | COG1337 |
| CDS | CSUB_C1001   | - | 970917  | 972032  | hypothetical protein                                                   | S | 371 | arCOG06024 |         |
| CDS | CSUB_C1002   | - | 972029  | 972670  | CRISPR-associated RAMP family protein                                  | V | 213 | arCOG02659 | COG1337 |
| CDS | CSUB_C1003   | - | 972667  | 975252  | conserved hypothetical protein                                         | V | 861 | arCOG02668 | COG1353 |
| CDS | CSUB_C1004   | - | 975249  | 976199  | conserved hypothetical protein                                         | V | 316 | arCOG02660 | COG1337 |
| CDS | CSUB_C1005   | - | 976183  | 977073  | CRISPR-associated RAMP family protein                                  | V | 296 | arCOG02658 | COG1337 |
| CDS | CSUB_C1006   | - | 977074  | 977793  | CRISPR-associated RAMP family protein                                  | V | 239 | arCOG02658 | COG1337 |
| CDS | CSUB_C1007   | - | 977790  | 978164  | conserved hypothetical protein                                         | S | 124 | arCOG07256 |         |
| CDS | CSUB_C1008   | - | 978509  | 980056  | hypothetical protein                                                   | S | 515 |            |         |
| CDS | CSUB_C1009   | - | 980685  | 980927  | hydrogenase maturation protein HypF                                    | O | 80  | arCOG01187 | COG0068 |
| CDS | CSUB_C1010   | - | 981082  | 981711  | thiamine-phosphate pyrophosphorylase                                   | H | 209 | arCOG01089 | COG0352 |
| CDS | CSUB_C1011   | - | 981695  | 982393  | thiamine biosynthesis protein ThiG                                     | H | 232 |            |         |
| CDS | CSUB_C1012   | - | 982477  | 982692  | thiamine biosynthesis protein ThiS                                     | H | 71  |            |         |
| CDS | CSUB_C1013-2 | - | 982685  | 983278  | glycine oxidase                                                        | E | 197 | arCOG00755 | COG0665 |
| CDS | CSUB_C1013-1 | - | 983223  | 983816  | glycine oxidase                                                        | R | 197 | arCOG00754 | COG0579 |
| CDS | CSUB_C1014   | + | 984006  | 984905  | DsbA oxidoreductase                                                    | Q | 299 | arCOG02869 | COG2761 |
| CDS | CSUB_C1015   | + | 984890  | 985624  | dithiol-disulfide isomerase                                            | Q | 244 | arCOG02869 | COG2761 |
| CDS | CSUB_C1016   | + | 985609  | 986400  | hypothetical protein                                                   | S | 263 |            |         |
| CDS | CSUB_C1017   | + | 986633  | 987061  | hydrogenase nickel incorporation protein HypA                          | R | 142 | arCOG04426 | COG0375 |
| CDS | CSUB_C1018   | + | 987054  | 987818  | ATP-binding protein involved in chromosome partitioning                | D | 254 | arCOG00585 | COG0489 |
| CDS | CSUB_C1019   | + | 987870  | 988997  | 4Fe-4S ferredoxin, iron-sulfur binding protein                         | C | 375 | arCOG05128 | COG1145 |
| CDS | CSUB_C1020   | + | 988994  | 989482  | transcriptional regulator, Crp/Fnr family                              | K | 162 |            |         |
| CDS | CSUB_C1021   | + | 989479  | 990333  | oxidoreductase FAD(NAD(P))-binding subunit                             | H | 284 | arCOG02199 | COG0543 |
| CDS | CSUB_C1022   | + | 990330  | 991091  | NADH ubiquinone oxidoreductase 20 kDa subunit                          | C | 253 | arCOG02472 | COG1941 |
| CDS | CSUB_C1023   | + | 991088  | 992374  | nickel-dependent hydrogenase large subunit                             | C | 428 | arCOG01549 | COG3259 |
| CDS | CSUB_C1024   | + | 992334  | 992816  | hydrogenase maturation protease                                        | C | 160 | arCOG04429 | COG0680 |
| CDS | CSUB_C1025   | - | 992821  | 995136  | hydrogenase maturation protein HypF                                    | O | 771 | arCOG01187 | COG0068 |
| CDS | CSUB_C1026   | + | 995226  | 996380  | hydrogenase expression/formation protein HypD                          | O | 384 | arCOG04428 | COG0409 |
| CDS | CSUB_C1027   | + | 996382  | 996690  | hydrogenase expression/formation protein HypC                          | O | 102 | arCOG04427 | COG0298 |
| CDS | CSUB_C1028   | + | 996696  | 997721  | hydrogenase expression/formation protein HypE                          | O | 341 | arCOG00636 | COG0309 |
| CDS | CSUB_C1029   | - | 997718  | 998596  | conserved hypothetical protein                                         | S | 292 |            |         |
| CDS | CSUB_C1030   | - | 998642  | 999568  | purine nucleosidase                                                    | F | 308 | arCOG04558 | COG1957 |
| CDS | CSUB_C1031   | + | 999683  | 1000294 | conserved hypothetical protein                                         | S | 203 |            |         |
| CDS | CSUB_C1032   | + | 1000345 | 1001154 | cobalt/nickel ABC transporter permease                                 | P | 269 | arCOG02250 | COG0619 |
| CDS | CSUB_C1033   | + | 1001161 | 1002048 | cobalt/nickel ABC transporter ATP-binding protein                      | P | 295 | arCOG00202 | COG1122 |
| CDS | CSUB_C1034   | + | 1002045 | 1002878 | cobalt/nickel ABC transporter ATP-binding protein                      | P | 277 | arCOG00202 | COG1122 |
| CDS | CSUB_C1035   | + | 1002882 | 1003844 | ribokinase                                                             | G | 320 | arCOG00014 | COG0524 |
| CDS | CSUB_C1036   | + | 1003936 | 1005510 | 2-isopropylmalate synthase                                             | E | 524 | arCOG02092 | COG0119 |
| CDS | CSUB_C1037   | - | 1005476 | 1005868 | translation initiation factor eIF-5A                                   | J | 130 | arCOG04277 | COG0231 |
| CDS | CSUB_C1038   | - | 1005908 | 1006585 | ATP-binding protein                                                    | R | 225 | arCOG00035 | COG2102 |
| CDS | CSUB_C1039   | + | 1006648 | 1007772 | succinyl-CoA synthetase beta subunit                                   | C | 374 | arCOG01337 | COG0045 |
| CDS | CSUB_C1040   | + | 1007780 | 1008655 | succinyl-CoA synthetase alpha subunit                                  | C | 291 | arCOG01339 | COG0074 |
| CDS | CSUB_C1041   | + | 1008652 | 1009443 | protein phosphatase                                                    | T | 263 | arCOG01143 | COG0639 |
| CDS | CSUB_C1042   | + | 1009445 | 1010323 | metallo-beta-lactamase protein                                         | R | 292 | arCOG00505 | COG0491 |
| CDS | CSUB_C1043   | + | 1010356 | 1011285 | malate dehydrogenase                                                   | C | 309 | arCOG00246 | COG0039 |
| CDS | CSUB_C1044   | + | 1011312 | 1011446 | conserved hypothetical protein                                         | S | 44  |            |         |
| CDS | CSUB_C1045   | + | 1011440 | 1012786 | peptidase M20                                                          | E | 448 | arCOG01110 | COG0624 |
| CDS | CSUB_C1046   | + | 1012791 | 1013693 | conserved hypothetical protein                                         | S | 300 | arCOG01096 | COG1814 |
| CDS | CSUB_C1047   | + | 1014102 | 1015274 | saccharopine dehydrogenase (NAD+, L-lysine forming)                    | E | 390 | arCOG00243 | COG1748 |

|      |            |   |         |         |                                                                         |   |      |            |         |
|------|------------|---|---------|---------|-------------------------------------------------------------------------|---|------|------------|---------|
| CDS  | CSUB_C1048 | + | 1015290 | 1016411 | conserved hypothetical protein                                          | E | 373  | arCOG01107 | COG0624 |
| CDS  | CSUB_C1049 | + | 1016423 | 1017811 | glutamate-1-semialdehyde-2,1-aminomutase                                | H | 462  | arCOG00918 | COG0001 |
| CDS  | CSUB_C1050 | + | 1017857 | 1018927 | spermidine/putrescine ABC transporter ATP-binding protein               | E | 356  | arCOG00177 | COG3842 |
| CDS  | CSUB_C1051 | + | 1018933 | 1019793 | spermidine/putrescine ABC transporter permease                          | E | 286  | arCOG00161 | COG1176 |
| CDS  | CSUB_C1052 | + | 1019808 | 1020563 | spermidine/putrescine ABC transporter permease                          | E | 286  | arCOG00162 | COG1177 |
| CDS  | CSUB_C1053 | - | 1020564 | 1021724 | spermidine/putrescine ABC transporter substrate-binding protein         | E | 351  | arCOG00220 | COG0687 |
| CDS  | CSUB_C1054 | - | 1021833 | 1022996 | saccharopine dehydrogenase                                              | E | 387  | arCOG00243 | COG1748 |
| CDS  | CSUB_C1055 | - | 1023017 | 1025308 | molybdenum hydroxylase family protein large subunit                     | C | 763  | arCOG01167 | COG1529 |
| CDS  | CSUB_C1056 | + | 1025394 | 1026731 | aminotransferase                                                        | E | 445  | arCOG00916 | COG0160 |
| CDS  | CSUB_C1057 | + | 1026979 | 1028316 | glutamate-1-semialdehyde-2,1-aminomutase                                | H | 445  | arCOG00918 | COG0001 |
| CDS  | CSUB_C1058 | - | 1028300 | 1029601 | 4-aminobutyrate aminotransferase                                        | E | 433  | arCOG00915 | COG0160 |
| CDS  | CSUB_C1059 | + | 1029690 | 1030658 | beta-lactamase domain protein                                           | R | 322  | arCOG00498 | COG0491 |
| CDS  | CSUB_C1060 | + | 1030776 | 1031588 | conserved hypothetical protein                                          | T | 270  | arCOG07602 |         |
| CDS  | CSUB_C1061 | + | 1031602 | 1031910 | conserved hypothetical protein                                          | S | 102  | arCOG07603 |         |
| CDS  | CSUB_C1062 | + | 1032168 | 1032623 | conserved hypothetical protein                                          | M | 151  | arCOG01568 | COG0668 |
| CDS  | CSUB_C1063 | - | 1032620 | 1033894 | threonine synthase                                                      | E | 424  | arCOG01434 | COG0498 |
| CDS  | CSUB_C1064 | - | 1033895 | 1034887 | conserved hypothetical protein                                          | C | 330  | arCOG00570 | COG0644 |
| CDS  | CSUB_C1065 | + | 1035017 | 1035550 | hypothetical protein                                                    | S | 177  | arCOG00551 | COG1711 |
| CDS  | CSUB_C1066 | + | 1035531 | 1037552 | minichromosome maintenance protein Mem                                  | L | 673  | arCOG00439 | COG1241 |
| CDS  | CSUB_C1067 | + | 1037621 | 1039756 | DEAD/DEAH box helicase                                                  | L | 711  | arCOG00553 | COG1204 |
| CDS  | CSUB_C1068 | - | 1039740 | 1040231 | dual specificity protein phosphatase                                    | T | 163  | arCOG03413 | COG2453 |
| CDS  | CSUB_C1069 | - | 1040235 | 1040966 | hypothetical protein                                                    | S | 243  |            |         |
| CDS  | CSUB_C1070 | - | 1040967 | 1041182 | hypothetical protein                                                    | S | 71   |            |         |
| CDS  | CSUB_C1071 | + | 1041201 | 1042067 | ribose-phosphate pyrophosphokinase                                      | F | 288  | arCOG00067 | COG0462 |
| CDS  | CSUB_C1072 | + | 1042076 | 1043092 | methyltransferase                                                       | L | 338  | arCOG00047 | COG1041 |
| CDS  | CSUB_C1073 | + | 1043094 | 1043999 | ribonuclease Z                                                          | R | 301  | arCOG00501 | COG1234 |
| CDS  | CSUB_C1074 | - | 1044001 | 1044381 | conserved hypothetical protein                                          | S | 126  | arCOG01043 | COG1931 |
| CDS  | CSUB_C1075 | - | 1044378 | 1044794 | signal-transduction protein                                             | R | 138  | arCOG00606 | COG0517 |
| CDS  | CSUB_C1076 | + | 1044902 | 1045558 | dTMP kinase                                                             | F | 218  | arCOG01891 | COG0125 |
| CDS  | CSUB_C1077 | + | 1045551 | 1046102 | 2'-5' RNA ligase                                                        | J | 183  | arCOG01736 | COG1514 |
| CDS  | CSUB_C1078 | + | 1046099 | 1047460 | tRNA nucleotidyltransferase                                             | J | 453  | arCOG00249 | COG1746 |
| CDS  | CSUB_C1079 | + | 1047472 | 1048176 | serine/threonine protein kinase                                         | T | 234  | arCOG01182 | COG2112 |
| CDS  | CSUB_C1080 | + | 1048195 | 1049589 | glycolate oxidase                                                       | C | 464  | arCOG00337 | COG0277 |
| CDS  | CSUB_C1081 | + | 1049571 | 1050461 | glucokinase                                                             | K | 296  | arCOG04280 | COG1940 |
| CDS  | CSUB_C1082 | + | 1050497 | 1051000 | transcriptional regulator, AsnC family                                  | K | 167  |            |         |
| CDS  | CSUB_C1083 | + | 1051044 | 1051517 | conserved hypothetical protein                                          | R | 157  | arCOG02017 | COG1853 |
| CDS  | CSUB_C1084 | - | 1051507 | 1052829 | aspartyl-tRNA synthetase                                                | J | 440  | arCOG00406 | COG0017 |
| CDS  | CSUB_C1085 | - | 1052835 | 1053371 | transcription elongation factor NusA                                    | K | 178  | arCOG01761 | COG0195 |
| CDS  | CSUB_C1086 | - | 1053402 | 1053686 | archaea-specific DNA-binding protein Alba                               | K | 94   | arCOG01753 | COG1581 |
| CDS  | CSUB_C1087 | + | 1053784 | 1053945 | large subunit ribosomal protein L40e                                    | J | 53   | arCOG00409 | COG1552 |
| tRNA | CSUB_T24   | + | 1053957 | 1054030 | tRNA-Val                                                                |   |      |            |         |
| CDS  | CSUB_C1088 | + | 1054253 | 1055470 | DNA primase small subunit                                               | L | 405  | arCOG04110 | COG1467 |
| CDS  | CSUB_C1089 | + | 1055548 | 1056006 | signal-transduction protein                                             | R | 152  | arCOG00606 | COG0517 |
| CDS  | CSUB_C1090 | + | 1056054 | 1056602 | conserved hypothetical protein                                          | L | 182  | arCOG00551 | COG1711 |
| CDS  | CSUB_C1091 | - | 1056594 | 1057715 | hypothetical protein                                                    | R | 373  | arCOG04127 | COG1341 |
| CDS  | CSUB_C1092 | - | 1057718 | 1058374 | hypothetical protein                                                    | S | 218  |            |         |
| CDS  | CSUB_C1093 | + | 1058395 | 1058652 | conserved hypothetical protein                                          | R | 85   | arCOG04136 | COG4888 |
| CDS  | CSUB_C1094 | + | 1058633 | 1059388 | geranylgeranyl glyceryl phosphate synthase-like protein                 | R | 251  | arCOG01085 | COG1646 |
| tRNA | CSUB_T25   | + | 1059370 | 1059467 | tRNA-Lys                                                                |   |      |            |         |
| CDS  | CSUB_C1095 | + | 1059636 | 1059866 | DNA-directed RNA polymerase subunit H                                   | K | 76   | arCOG04258 | COG2012 |
| CDS  | CSUB_C1096 | + | 1059869 | 1063222 | DNA-directed RNA polymerase subunit B                                   | K | 1117 | arCOG01762 | COG0085 |
| CDS  | CSUB_C1097 | + | 1063219 | 1066983 | DNA-directed RNA polymerase subunit A'                                  | K | 1254 | arCOG04257 | COG0086 |
| CDS  | CSUB_C1098 | + | 1066986 | 1067306 | large subunit ribosomal protein L30e                                    | J | 106  | arCOG01752 | COG1911 |
| CDS  | CSUB_C1099 | + | 1067291 | 1067725 | N utilization substance protein A                                       | K | 144  | arCOG01760 | COG0195 |
| CDS  | CSUB_C1100 | + | 1067766 | 1068137 | conserved hypothetical protein                                          | R | 123  |            |         |
| CDS  | CSUB_C1101 | - | 1068079 | 1068843 | FKBP-type peptidylprolyl isomerase                                      | O | 254  | arCOG00980 | COG1047 |
| CDS  | CSUB_C1102 | + | 1068944 | 1069606 | proteasome beta subunit                                                 | O | 220  | arCOG00970 | COG0638 |
| CDS  | CSUB_C1103 | + | 1069617 | 1071524 | beta-lactamase domain protein                                           | R | 635  | arCOG00543 | COG1782 |
| CDS  | CSUB_C1104 | + | 1071562 | 1071786 | small nuclear ribonucleoprotein                                         | K | 74   | arCOG00998 | COG1958 |
| CDS  | CSUB_C1105 | + | 1071886 | 1072068 | hypothetical protein                                                    | S | 60   |            |         |
| CDS  | CSUB_C1106 | + | 1072058 | 1072258 | plasmid stabilization system protein                                    | K | 66   | arCOG01663 | COG2026 |
| CDS  | CSUB_C1107 | + | 1072465 | 1072632 | large subunit ribosomal protein L37e                                    | J | 55   | arCOG04126 | COG2126 |
| tRNA | CSUB_T26   | + | 1072672 | 1072802 | tRNA-Leu                                                                |   |      |            |         |
| CDS  | CSUB_C1108 | - | 1072817 | 1073311 | hypothetical protein                                                    | S | 164  |            |         |
| CDS  | CSUB_C1109 | - | 1073308 | 1075236 | glycosyl transferase family 2                                           | M | 642  | arCOG01389 | COG1215 |
| CDS  | CSUB_C1110 | + | 1075330 | 1076100 | hypothetical protein                                                    | S | 256  |            |         |
| CDS  | CSUB_C1111 | + | 1076088 | 1077467 | anaerobic magnesium-protoporphyrin IX monomethyl ester cyclase          | C | 459  | arCOG01356 | COG1032 |
| CDS  | CSUB_C1112 | - | 1077451 | 1078116 | hypothetical protein                                                    | S | 221  |            |         |
| CDS  | CSUB_C1113 | - | 1078089 | 1079294 | hypothetical protein                                                    | S | 401  |            |         |
| CDS  | CSUB_C1114 | - | 1079295 | 1079735 | hypothetical protein                                                    | S | 146  |            |         |
| CDS  | CSUB_C1115 | - | 1079837 | 1080415 | imidazoleglycerol-phosphate dehydratase                                 | E | 192  | arCOG04398 | COG0131 |
| CDS  | CSUB_C1116 | - | 1080390 | 1081400 | ATP phosphoribosyltransferase                                           | E | 336  | arCOG02208 | COG0040 |
| CDS  | CSUB_C1117 | + | 1081478 | 1082071 | glutamine amidotransferase                                              | E | 197  | arCOG00089 | COG0118 |
| CDS  | CSUB_C1118 | - | 1082061 | 1082381 | phosphoribosyl-AMP cyclohydrolase                                       | E | 106  | arCOG02676 | COG0139 |
| CDS  | CSUB_C1119 | - | 1082378 | 1083142 | imidazoleglycerol-phosphate synthase cyclase                            | E | 254  | arCOG00617 | COG0107 |
| CDS  | CSUB_C1120 | - | 1083162 | 1083887 | phosphoribosylformimino-5-aminoimidazole carboxamide ribotide isomerase | E | 241  | arCOG00618 | COG0106 |
| CDS  | CSUB_C1121 | - | 1083920 | 1084324 | hypothetical protein                                                    | S | 134  |            |         |
| CDS  | CSUB_C1122 | + | 1084516 | 1085370 | hypothetical protein                                                    | S | 284  |            |         |
| CDS  | CSUB_C1123 | + | 1085748 | 1086689 | conserved hypothetical protein                                          | S | 313  | arCOG05870 |         |
| CDS  | CSUB_C1124 | + | 1086696 | 1087514 | circadian clock protein KaiC                                            | T | 272  | arCOG01171 | COG0467 |
| CDS  | CSUB_C1125 | + | 1087554 | 1090964 | DNA polymerase II large subunit, family D                               | L | 1136 | arCOG04447 | COG1933 |
| CDS  | CSUB_C1126 | + | 1090967 | 1091233 | conserved hypothetical protein                                          | K | 88   | arCOG00731 | COG0640 |
| CDS  | CSUB_C1127 | - | 1091230 | 1091400 | preprotein translocase subunit Sec61 beta                               | U | 56   | arCOG02958 | COG4023 |
| CDS  | CSUB_C1128 | - | 1091440 | 1092396 | conserved hypothetical protein                                          | J | 318  | arCOG00545 | COG1236 |
| CDS  | CSUB_C1129 | + | 1092470 | 1094227 | conserved hypothetical protein                                          | S | 585  | arCOG04351 | COG3356 |
| CDS  | CSUB_C1130 | - | 1094230 | 1094496 | hypothetical protein                                                    | S | 88   |            |         |
| CDS  | CSUB_C1131 | + | 1094604 | 1094888 | archaea-specific DNA-binding protein Alba                               | K | 94   | arCOG01753 | COG1581 |
| CDS  | CSUB_C1132 | + | 1094920 | 1096140 | acyl-CoA dehydrogenase                                                  | I | 406  | arCOG04310 | COG1960 |
| CDS  | CSUB_C1133 | - | 1096130 | 1096951 | NAD+ synthase                                                           | H | 273  | arCOG00069 | COG0171 |
| CDS  | CSUB_C1134 | + | 1097010 | 1098131 | hypothetical protein                                                    | S | 373  | arCOG00385 |         |
| CDS  | CSUB_C1135 | - | 1098121 | 1099281 | molybdopterin biosynthesis protein MoeB                                 | H | 386  | arCOG01676 | COG0476 |
| CDS  | CSUB_C1136 | + | 1099422 | 1100108 | ABC transporter ATP-binding protein                                     | V | 228  | arCOG00922 | COG1136 |
| CDS  | CSUB_C1137 | + | 1100105 | 1102030 | conserved hypothetical protein                                          | M | 641  | arCOG02089 | COG1361 |
| CDS  | CSUB_C1138 | + | 1102027 | 1103283 | conserved hypothetical protein                                          | V | 418  | arCOG02312 | COG0577 |
| CDS  | CSUB_C1139 | + | 1103372 | 1104631 | conserved hypothetical protein                                          | R | 419  | arCOG01115 | COG1571 |
| CDS  | CSUB_C1140 | - | 1104628 | 1105434 | conserved hypothetical protein                                          | R | 268  | arCOG01688 | COG1719 |
| CDS  | CSUB_C1141 | - | 1105495 | 1106487 | phosphate uptake regulator                                              | P | 330  | arCOG00318 | COG0704 |
| CDS  | CSUB_C1142 | + | 1106596 | 1107885 | isocitrate lyase                                                        | C | 429  | arCOG00583 | COG2224 |
| CDS  | CSUB_C1143 | + | 1107889 | 1109466 | malate synthase                                                         | G | 525  |            |         |
| CDS  | CSUB_C1144 | + | 1109488 | 1110621 | conserved hypothetical protein                                          | L | 377  | arCOG00048 | COG0116 |
| CDS  | CSUB_C1145 | - | 1110607 | 1111155 | conserved hypothetical protein                                          | S | 182  |            |         |
| CDS  | CSUB_C1146 | + | 1111257 | 1111832 | hypothetical protein                                                    | S | 191  |            |         |
| CDS  | CSUB_C1147 | + | 1111899 | 1112462 | 20S proteasome beta subunit                                             | O | 187  | arCOG00970 | COG0638 |
| CDS  | CSUB_C1148 | + | 1112466 | 1113155 | 20S proteasome alpha subunit                                            | O | 229  | arCOG00971 | COG0638 |
| CDS  | CSUB_C1149 | - | 1113150 | 1113383 | regulatory protein, AsnC/Lrp family                                     | K | 77   | arCOG01117 | COG1522 |
| CDS  | CSUB_C1150 | + | 1113474 | 1114130 | beta-lactamase domain protein                                           | R | 218  | arCOG00504 | COG0491 |
| CDS  | CSUB_C1151 | + | 1114127 | 1114822 | uracil-DNA glycosylase superfamily protein                              | L | 231  | arCOG00905 | COG1573 |

|      |            |   |         |         |                                                                    |   |      |            |         |
|------|------------|---|---------|---------|--------------------------------------------------------------------|---|------|------------|---------|
| CDS  | CSUB_C1152 | - | 1114764 | 1115930 | major facilitator superfamily MFS                                  | G | 388  | arCOG00130 | COG0477 |
| CDS  | CSUB_C1153 | - | 1115927 | 1117003 | conserved hypothetical protein                                     | S | 358  |            |         |
| CDS  | CSUB_C1154 | + | 1117091 | 1118212 | threonine synthase                                                 | E | 373  | arCOG01434 | COG0498 |
| CDS  | CSUB_C1155 | + | 1118213 | 1119313 | conserved hypothetical protein                                     | G | 366  | arCOG00130 | COG0477 |
| CDS  | CSUB_C1156 | - | 1119310 | 1120350 | phosphate regulatory protein                                       | P | 346  | arCOG00318 | COG0704 |
| CDS  | CSUB_C1157 | - | 1120445 | 1121974 | conserved hypothetical protein                                     | C | 509  | arCOG00288 | COG0778 |
| CDS  | CSUB_C1158 | - | 1122007 | 1123203 | thiamine biosynthesis protein ThiI                                 | H | 398  | arCOG00038 | COG0301 |
| CDS  | CSUB_C1159 | + | 1123269 | 1124759 | betaine-aldehyde dehydrogenase                                     | C | 496  | arCOG01252 | COG1012 |
| CDS  | CSUB_C1160 | + | 1124801 | 1125232 | hypothetical protein                                               | S | 143  |            |         |
| CDS  | CSUB_C1161 | - | 1125221 | 1125817 | multiple antibiotic resistance protein                             | U | 198  | arCOG01997 | COG2095 |
| CDS  | CSUB_C1162 | - | 1125854 | 1126360 | conserved hypothetical protein                                     | S | 168  |            |         |
| CDS  | CSUB_C1163 | - | 1126370 | 1127005 | cytochrome c oxidase subunit III                                   | C | 211  | arCOG04650 | COG1845 |
| CDS  | CSUB_C1164 | - | 1127235 | 1128074 | translation initiation factor eIF-2B                               | J | 279  | arCOG01124 | COG1184 |
| CDS  | CSUB_C1165 | - | 1128071 | 1129093 | alcohol dehydrogenase                                              | C | 340  | arCOG01458 | COG0604 |
| CDS  | CSUB_C1166 | - | 1129102 | 1129914 | amidohydrolase                                                     | R | 270  | arCOG00062 | COG0388 |
| CDS  | CSUB_C1167 | - | 1129926 | 1130777 | deoxyribonuclease IV                                               | L | 283  | arCOG01894 | COG0648 |
| CDS  | CSUB_C1168 | - | 1134600 | 1135580 | glyoxalase family protein                                          | R | 326  | arCOG06106 | COG2514 |
| CDS  | CSUB_C1169 | - | 1135878 | 1136447 | signal peptidase, type I                                           | U | 189  | arCOG01739 | COG0681 |
| CDS  | CSUB_C1170 | - | 1136460 | 1139195 | hypothetical protein                                               | S | 911  |            |         |
| CDS  | CSUB_C1171 | - | 1139279 | 1139827 | conserved hypothetical protein                                     | S | 182  | arCOG05463 |         |
| CDS  | CSUB_C1172 | - | 1139868 | 1141238 | carbohydrate kinase                                                | G | 456  | arCOG00025 | COG1070 |
| CDS  | CSUB_C1173 | + | 1141314 | 1141976 | uracil phosphoribosyltransferase                                   | F | 220  | arCOG04128 | COG0035 |
| CDS  | CSUB_C1174 | + | 1142022 | 1143677 | 3-oxosteroid 1-dehydrogenase                                       | C | 551  |            |         |
| tRNA | CSUB_T27   | - | 1143677 | 1143748 | tRNA-Cys                                                           |   |      |            |         |
| CDS  | CSUB_C1175 | - | 1143782 | 1144000 | conserved hypothetical protein                                     | S | 72   |            |         |
| CDS  | CSUB_C1176 | + | 1144061 | 1144486 | regulatory protein, ArsR                                           | K | 141  | arCOG05900 | COG3355 |
| CDS  | CSUB_C1177 | - | 1144751 | 1146472 | Fe-S oxidoreductase                                                | C | 573  | arCOG01357 | COG1032 |
| CDS  | CSUB_C1178 | + | 1146549 | 1146953 | phage shock protein C, PspC                                        | K | 134  | arCOG03456 | COG1983 |
| CDS  | CSUB_C1179 | - | 1146969 | 1147511 | hypothetical protein                                               | S | 180  |            |         |
| CDS  | CSUB_C1180 | + | 1147556 | 1148524 | homoserine dehydrogenase                                           | E | 322  | arCOG01351 | COG0460 |
| CDS  | CSUB_C1181 | + | 1148577 | 1149980 | aspartate kinase                                                   | E | 467  | arCOG00861 | COG0527 |
| CDS  | CSUB_C1182 | + | 1150102 | 1150644 | hypothetical protein                                               | S | 180  |            |         |
| CDS  | CSUB_C1183 | - | 1150641 | 1151063 | hypothetical protein                                               | S | 140  |            |         |
| CDS  | CSUB_C1184 | - | 1151557 | 1151787 | conserved hypothetical protein                                     | S | 76   | arCOG02270 | COG5428 |
| CDS  | CSUB_C1185 | - | 1151778 | 1152062 | conserved hypothetical protein                                     | S | 94   | arCOG04024 |         |
| CDS  | CSUB_C1186 | + | 1152108 | 1152302 | hypothetical protein                                               | S | 64   |            |         |
| CDS  | CSUB_C1187 | - | 1152393 | 1153007 | conserved hypothetical protein                                     | M | 204  | arCOG01573 | COG0668 |
| CDS  | CSUB_C1188 | + | 1153144 | 1154259 | metalloprotease                                                    | M | 371  | arCOG04064 | COG0750 |
| CDS  | CSUB_C1189 | - | 1154266 | 1155192 | ATPase                                                             | D | 308  | arCOG00042 | COG0037 |
| CDS  | CSUB_C1190 | + | 1155301 | 1156077 | FdhD/NarQ family/nitrate assimilation protein                      | C | 258  | arCOG04358 | COG1526 |
| CDS  | CSUB_C1191 | + | 1156324 | 1157586 | molybdopterin biosynthesis protein MoeA                            | H | 420  | arCOG00216 | COG0303 |
| CDS  | CSUB_C1192 | + | 1157599 | 1159557 | molybdopterin biosynthesis protein MoeA                            | H | 652  | arCOG00217 | COG0303 |
| CDS  | CSUB_C1193 | + | 1159554 | 1160324 | thiosulfate sulfurtransferase                                      | P | 256  | arCOG02019 | COG2897 |
| CDS  | CSUB_C1194 | + | 1160362 | 1161243 | hypothetical protein                                               | S | 293  |            |         |
| CDS  | CSUB_C1195 | - | 1161240 | 1162007 | hypothetical protein                                               | O | 255  | arCOG05634 | COG3058 |
| CDS  | CSUB_C1196 | + | 1162166 | 1165231 | formate dehydrogenase alpha subunit                                | C | 1021 | arCOG01491 | COG0243 |
| CDS  | CSUB_C1197 | + | 1165233 | 1166252 | formate dehydrogenase beta subunit                                 | C | 339  | arCOG01503 | COG0437 |
| CDS  | CSUB_C1198 | + | 1166254 | 1167126 | formate-dependent nitrite reductase complex, transmembrane protein | P | 290  | arCOG02027 | COG3301 |
| CDS  | CSUB_C1199 | - | 1167123 | 1167740 | hypothetical protein                                               | S | 205  |            |         |
| CDS  | CSUB_C1201 | - | 1167891 | 1168271 | hypothetical protein                                               | S | 126  |            |         |
| CDS  | CSUB_C1202 | - | 1168278 | 1169090 | hypothetical protein                                               | S | 270  |            |         |
| tRNA | CSUB_T28   | + | 1169456 | 1169529 | tRNA-Ala                                                           |   |      |            |         |
| CDS  | CSUB_C1203 | + | 1169587 | 1170960 | deoxyribodipyrimidine photo-lyase                                  | L | 457  | arCOG02840 | COG0415 |
| tRNA | CSUB_T29   | - | 1170942 | 1171016 | tRNA-Glu                                                           |   |      |            |         |
| CDS  | CSUB_C1204 | - | 1171068 | 1171535 | GCN5-related N-acetyltransferase                                   | K | 155  | arCOG00826 | COG0454 |
| CDS  | CSUB_C1205 | - | 1171537 | 1172859 | malate dehydrogenase (oxaloacetate-decarboxylating)                | C | 440  | arCOG00853 | COG0281 |
| CDS  | CSUB_C1206 | + | 1172938 | 1174947 | Fe-S oxidoreductase                                                | C | 669  | arCOG00332 | COG0247 |
| CDS  | CSUB_C1207 | + | 1174963 | 1175778 | electron transfer flavoprotein beta subunit                        | C | 271  | arCOG00446 | COG2086 |
| CDS  | CSUB_C1208 | + | 1175775 | 1176716 | electron transfer flavoprotein alpha subunit                       | C | 313  | arCOG00447 | COG2025 |
| CDS  | CSUB_C1209 | + | 1176720 | 1177328 | hypothetical protein                                               | H | 202  | arCOG01872 | COG0746 |
| CDS  | CSUB_C1210 | + | 1177331 | 1178311 | hydrogenase expression/formation protein HypE                      | O | 326  | arCOG00636 | COG0309 |
| CDS  | CSUB_C1211 | + | 1178349 | 1178858 | nitroreductase                                                     | C | 169  | arCOG00288 | COG0778 |
| CDS  | CSUB_C1212 | - | 1178861 | 1179397 | conserved hypothetical protein                                     | R | 178  | arCOG00264 | COG2041 |
| CDS  | CSUB_C1213 | + | 1179442 | 1182630 | isoleucyl-tRNA synthetase                                          | J | 102  | arCOG00807 | COG0060 |
| CDS  | CSUB_C1214 | + | 1182641 | 1183303 | hypothetical protein                                               | S | 260  |            |         |
| CDS  | CSUB_C1215 | + | 1183344 | 1183577 | small nuclear ribonucleoprotein                                    | K | 77   | arCOG00998 | COG1958 |
| CDS  | CSUB_C1216 | + | 1183637 | 1184866 | S-adenosylmethionine synthetase                                    | E | 409  | arCOG01678 | COG1812 |
| CDS  | CSUB_C1217 | - | 1184863 | 1185585 | conserved hypothetical protein                                     | L | 240  | arCOG01304 | COG1637 |
| CDS  | CSUB_C1218 | - | 1185590 | 1186930 | hypothetical protein                                               | S | 446  |            |         |
| CDS  | CSUB_C1219 | - | 1186936 | 1188435 | elongator complex protein 3                                        | K | 499  | arCOG01361 | COG1243 |
| CDS  | CSUB_C1220 | - | 1188439 | 1189344 | F420-dependent N5,N10-methylenetetrahydromethanopterin reductase   | C | 301  | arCOG02410 | COG2141 |
| CDS  | CSUB_C1221 | - | 1189592 | 1190416 | conserved hypothetical protein                                     | R | 274  | arCOG01648 | COG0596 |
| CDS  | CSUB_C1222 | + | 1190517 | 1191224 | conserved hypothetical protein                                     | R | 235  | arCOG01848 | COG0110 |
| CDS  | CSUB_C1223 | + | 1191293 | 1191601 | translation initiation factor SUII                                 | J | 102  | arCOG04223 | COG0023 |
| CDS  | CSUB_C1224 | - | 1191598 | 1192521 | transcription initiation factor THIB                               | K | 307  | arCOG01981 | COG1405 |
| CDS  | CSUB_C1225 | + | 1192666 | 1194093 | cysteinyI-tRNA synthetase                                          | J | 475  | arCOG00486 | COG0215 |
| CDS  | CSUB_C1226 | + | 1194101 | 1194811 | nucleotidyl transferase                                            | M | 236  | arCOG00663 | COG1208 |
| CDS  | CSUB_C1227 | - | 1194780 | 1195292 | ribosomal-protein-alanine N-acetyltransferase                      | R | 170  | arCOG00833 | COG0456 |
| CDS  | CSUB_C1228 | - | 1195331 | 1196038 | metallophosphoesterase                                             | R | 235  | arCOG01156 | COG1408 |
| CDS  | CSUB_C1229 | + | 1196085 | 1197086 | thioesterase superfamily protein                                   | I | 333  | arCOG00773 | COG1607 |
| CDS  | CSUB_C1230 | + | 1197067 | 1198062 | FMN-dependent monooxygenase                                        | C | 331  | arCOG02410 | COG2141 |
| CDS  | CSUB_C1231 | + | 1198098 | 1200761 | pyruvate phosphate dikinase                                        | G | 887  | arCOG01111 | COG0574 |
| CDS  | CSUB_C1232 | - | 1200758 | 1201174 | conserved hypothetical protein                                     | S | 138  | arCOG04038 |         |
| CDS  | CSUB_C1233 | + | 1201306 | 1202076 | proliferating cell nuclear antigen PCNA                            | L | 256  | arCOG00488 | COG0592 |
| tRNA | CSUB_T30   | + | 1202109 | 1202184 | tRNA-Pro                                                           |   |      |            |         |
| CDS  | CSUB_C1234 | + | 1202258 | 1203352 | metalloprotease                                                    | M | 364  | arCOG00609 | COG0750 |
| CDS  | CSUB_C1235 | - | 1203293 | 1204357 | hypothetical protein                                               | S | 354  |            |         |
| CDS  | CSUB_C1236 | + | 1204387 | 1205028 | nitroreductase                                                     | C | 213  | arCOG00288 | COG0778 |
| CDS  | CSUB_C1237 | + | 1205022 | 1205954 | LPPG:Fo 2-phospho-L-lactate transferase                            | S | 310  | arCOG04395 | COG0391 |
| CDS  | CSUB_C1238 | + | 1205951 | 1206541 | hypothetical protein                                               | R | 196  | arCOG04472 | COG1920 |
| CDS  | CSUB_C1239 | - | 1206473 | 1207852 | hypothetical protein                                               | S | 459  |            |         |
| tRNA | CSUB_T31   | - | 1207874 | 1207947 | tRNA-Gly                                                           |   |      |            |         |
| CDS  | CSUB_C1240 | - | 1207992 | 1209245 | beta-lactamase domain protein                                      | J | 417  | arCOG00541 | COG1236 |
| CDS  | CSUB_C1241 | - | 1209290 | 1209532 | hypothetical protein                                               | S | 80   |            |         |
| CDS  | CSUB_C1242 | + | 1209562 | 1210515 | deoxyhypusine synthase                                             | O | 317  | arCOG04142 | COG1899 |
| CDS  | CSUB_C1243 | - | 1210518 | 1211738 | aspartate kinase                                                   | E | 406  | arCOG00861 | COG0527 |
| CDS  | CSUB_C1244 | - | 1211836 | 1214106 | aldehyde oxidase and xanthine dehydrogenase, molybdopterin binding | C | 756  | arCOG01167 | COG1529 |
| CDS  | CSUB_C1245 | - | 1214103 | 1214975 | molybdopterin dehydrogenase FAD-binding                            | C | 290  | arCOG01926 | COG1319 |
| CDS  | CSUB_C1246 | - | 1214972 | 1215442 | carbon-monoxide dehydrogenase small subunit                        | C | 156  | arCOG01925 | COG2080 |
| CDS  | CSUB_C1247 | - | 1215482 | 1216000 | heat repeat-containing PBS lyase                                   | S | 172  | arCOG04006 | COG1413 |
| CDS  | CSUB_C1248 | + | 1216059 | 1216328 | conserved hypothetical protein                                     | H | 89   | arCOG00537 | COG1977 |
| CDS  | CSUB_C1249 | + | 1216330 | 1216863 | conserved hypothetical protein                                     | R | 177  |            |         |
| CDS  | CSUB_C1250 | - | 1216856 | 1217440 | translation factor                                                 | J | 194  | arCOG01952 | COG0009 |
| CDS  | CSUB_C1251 | - | 1217460 | 1217783 | hypothetical protein                                               | S | 107  |            |         |
| CDS  | CSUB_C1252 | - | 1217795 | 1218727 | branched-chain amino acid aminotransferase                         | E | 310  | arCOG02297 | COG0115 |
| CDS  | CSUB_C1253 | - | 1218745 | 1219389 | conserved hypothetical protein                                     | O | 214  | arCOG01218 | COG0526 |
| CDS  | CSUB_C1254 | - | 1219421 | 1220608 | aminotransferase                                                   | E | 395  | arCOG00082 | COG0075 |

|      |            |   |         |         |                                                                         |   |      |            |         |
|------|------------|---|---------|---------|-------------------------------------------------------------------------|---|------|------------|---------|
| CDS  | CSUB_C1255 | - | 1220645 | 1220938 | conserved hypothetical protein                                          | R | 97   | arCOG01845 | COG2151 |
| CDS  | CSUB_C1256 | + | 1220989 | 1221318 | V-type H <sup>+</sup> -transporting ATPase subunit G                    | C | 109  |            |         |
| CDS  | CSUB_C1257 | + | 1221325 | 1222380 | V-type H <sup>+</sup> -transporting ATPase subunit C                    | C | 351  | arCOG02459 | COG1527 |
| CDS  | CSUB_C1258 | - | 1222339 | 1222650 | SirA family protein                                                     | O | 103  | arCOG02062 | COG0425 |
| CDS  | CSUB_C1259 | + | 1222766 | 1223959 | conserved hypothetical protein                                          | R | 397  | arCOG05632 | COG2391 |
| CDS  | CSUB_C1260 | + | 1223985 | 1225091 | conserved hypothetical protein                                          | C | 368  | arCOG04329 | COG2441 |
| CDS  | CSUB_C1261 | - | 1225077 | 1226012 | beta-ribofuranosylaminobenzene 5'-phosphate synthase                    | R | 311  | arCOG01026 | COG1907 |
| CDS  | CSUB_C1262 | - | 1226009 | 1226632 | hypothetical protein                                                    | R | 207  | arCOG04458 | COG2457 |
| CDS  | CSUB_C1263 | - | 1226629 | 1227765 | pyruvate dehydrogenase E2 component (dihydropyridine acetyltransferase) | C | 378  | arCOG01706 | COG0508 |
| CDS  | CSUB_C1264 | - | 1227772 | 1228941 | conserved hypothetical protein                                          | G | 389  | arCOG00130 | COG0477 |
| CDS  | CSUB_C1265 | - | 1228948 | 1231026 | conserved hypothetical protein                                          | O | 692  | arCOG02007 | COG1331 |
| CDS  | CSUB_C1266 | + | 1231072 | 1232163 | tyrosyl-tRNA synthetase                                                 | F | 363  | arCOG01886 | COG0162 |
| CDS  | CSUB_C1267 | + | 1232300 | 1235386 | ribonucleoside-diphosphate reductase alpha chain                        | J | 1028 | arCOG04276 | COG0209 |
| CDS  | CSUB_C1268 | + | 1235429 | 1236889 | multicomponent Na <sup>+</sup> :H <sup>+</sup> antiporter subunit D     | C | 486  | arCOG01537 | COG0651 |
| CDS  | CSUB_C1269 | + | 1236921 | 1238018 | DNA topoisomerase VI subunit A                                          | L | 365  | arCOG04143 | COG1697 |
| CDS  | CSUB_C1270 | + | 1238015 | 1238800 | metallophosphoesterase                                                  | R | 261  | arCOG01150 | COG1407 |
| CDS  | CSUB_C1271 | + | 1238797 | 1239141 | conserved hypothetical protein                                          | S | 114  | arCOG01121 | COG5431 |
| CDS  | CSUB_C1272 | - | 1239138 | 1239506 | conserved hypothetical protein                                          | S | 122  | arCOG02999 | COG1917 |
| CDS  | CSUB_C1273 | + | 1239577 | 1240713 | hypothetical protein                                                    | S | 378  |            |         |
| CDS  | CSUB_C1274 | - | 1240797 | 1241711 | homoserine kinase                                                       | E | 304  | arCOG01027 | COG0083 |
| CDS  | CSUB_C1275 | - | 1241718 | 1242737 | 3-isopropylmalate dehydrogenase                                         | C | 339  | arCOG01163 | COG0473 |
| CDS  | CSUB_C1276 | + | 1242792 | 1244060 | pyruvate formate lyase activating enzyme                                | C | 422  | arCOG00934 | COG1313 |
| CDS  | CSUB_C1277 | + | 1244080 | 1244661 | conserved hypothetical protein                                          | S | 193  | arCOG03765 |         |
| CDS  | CSUB_C1278 | + | 1244748 | 1245284 | conserved hypothetical protein                                          | S | 178  | arCOG01471 | COG3945 |
| CDS  | CSUB_C1279 | - | 1245281 | 1246489 | hypothetical protein                                                    | S | 402  |            |         |
| tRNA | CSUB_T32   | - | 1246533 | 1246606 | tRNA-Asp                                                                |   |      |            |         |
| CDS  | CSUB_C1280 | + | 1246753 | 1249482 | peptide/nickel ABC transporter substrate-binding protein                | E | 909  | arCOG01672 | COG3889 |
| CDS  | CSUB_C1281 | + | 1249529 | 1250593 | peptide/nickel ABC transporter permease                                 | E | 354  | arCOG00751 | COG0601 |
| CDS  | CSUB_C1282 | + | 1250593 | 1251999 | peptide/nickel ABC transporter permease                                 | E | 468  | arCOG00749 | COG1173 |
| CDS  | CSUB_C1283 | + | 1252207 | 1253190 | peptide/nickel ABC transporter ATP-binding protein                      | E | 327  | arCOG00181 | COG0444 |
| CDS  | CSUB_C1284 | + | 1253194 | 1254189 | peptide/nickel ABC transporter ATP-binding protein                      | E | 331  | arCOG00184 | COG4608 |
| CDS  | CSUB_C1285 | + | 1254214 | 1254936 | hypothetical protein                                                    | S | 240  |            |         |
| CDS  | CSUB_C1286 | - | 1254945 | 1256432 | multicomponent Na <sup>+</sup> :H <sup>+</sup> antiporter subunit D     | C | 495  | arCOG01537 | COG0651 |
| CDS  | CSUB_C1287 | + | 1256550 | 1257956 | hypothetical protein                                                    | S | 468  |            |         |
| CDS  | CSUB_C1288 | - | 1257949 | 1259862 | NADH dehydrogenase I subunit L                                          | C | 637  | arCOG01539 | COG1009 |
| CDS  | CSUB_C1289 | + | 1259946 | 1260278 | conserved hypothetical protein                                          | P | 110  | arCOG04231 | COG1324 |
| CDS  | CSUB_C1290 | + | 1260253 | 1260792 | conserved hypothetical protein                                          | R | 179  | arCOG03705 | COG1547 |
| CDS  | CSUB_C1291 | + | 1260827 | 1261558 | conserved hypothetical protein                                          | S | 243  | arCOG05752 | COG4720 |
| CDS  | CSUB_C1292 | - | 1261548 | 1262321 | Fe-S cluster assembly ATP-binding protein SufC                          | O | 257  | arCOG04236 | COG0396 |
| CDS  | CSUB_C1293 | + | 1262384 | 1263787 | conserved hypothetical protein                                          | J | 467  | arCOG00547 | COG0595 |
| CDS  | CSUB_C1294 | - | 1263784 | 1264479 | conserved hypothetical protein                                          | S | 231  | arCOG01907 | COG2013 |
| CDS  | CSUB_C1295 | - | 1264513 | 1266387 | arginyl-tRNA synthetase                                                 | J | 624  | arCOG00487 | COG0018 |
| CDS  | CSUB_C1296 | + | 1266443 | 1266982 | conserved hypothetical protein                                          | S | 179  | arCOG02864 | COG2322 |
| CDS  | CSUB_C1297 | + | 1267021 | 1268178 | GTP-binding protein                                                     | R | 385  | arCOG00358 | COG1163 |
| CDS  | CSUB_C1298 | + | 1268213 | 1268509 | V-type H <sup>+</sup> -transporting ATPase subunit F                    | C | 98   | arCOG04102 | COG1436 |
| CDS  | CSUB_C1299 | + | 1268551 | 1269150 | V-type H <sup>+</sup> -transporting ATPase subunit E                    | C | 199  | arCOG00869 | COG1390 |
| CDS  | CSUB_C1300 | + | 1269153 | 1269956 | 5'-nucleotidase SurE                                                    | R | 267  | arCOG02303 | COG0496 |
| CDS  | CSUB_C1301 | + | 1270025 | 1270498 | hypothetical protein                                                    | S | 157  |            |         |
| CDS  | CSUB_C1302 | - | 1270495 | 1270926 | transcriptional regulator, AsnC family                                  | K | 143  | arCOG01580 | COG1522 |
| CDS  | CSUB_C1303 | + | 1270982 | 1272049 | N-acetyl-gamma-glutamyl-phosphate reductase                             | E | 355  | arCOG00495 | COG0002 |
| CDS  | CSUB_C1304 | + | 1272080 | 1272874 | acetylglutamate/acetylaminoadipate kinase                               | E | 264  | arCOG00862 | COG0548 |
| CDS  | CSUB_C1305 | + | 1272995 | 1273171 | lysine biosynthesis protein LysW                                        | E | 58   | arCOG01588 |         |
| CDS  | CSUB_C1306 | + | 1273175 | 1274020 | lysine biosynthesis protein LysX                                        | H | 281  | arCOG01589 | COG0189 |
| CDS  | CSUB_C1307 | + | 1274017 | 1275198 | acetylornithine aminotransferase                                        | E | 393  | arCOG00914 | COG4992 |
| CDS  | CSUB_C1308 | - | 1275175 | 1276386 | conserved hypothetical protein                                          | R | 403  | arCOG01229 | COG2403 |
| CDS  | CSUB_C1309 | + | 1276603 | 1277667 | acetyl-lysine deacetylase                                               | E | 354  | arCOG01107 | COG0624 |
| CDS  | CSUB_C1310 | - | 1277656 | 1279089 | argininosuccinate lyase                                                 | E | 477  | arCOG01748 | COG0165 |
| CDS  | CSUB_C1311 | - | 1279093 | 1280277 | argininosuccinate synthase                                              | E | 394  | arCOG00112 | COG0137 |
| CDS  | CSUB_C1312 | - | 1280310 | 1280720 | conserved hypothetical protein                                          | S | 136  |            |         |
| CDS  | CSUB_C1313 | - | 1280725 | 1281075 | DNA-binding protein                                                     | R | 116  | arCOG04179 | COG2118 |
| CDS  | CSUB_C1314 | - | 1281105 | 1281806 | conserved hypothetical protein                                          | J | 233  | arCOG00989 | COG0343 |
| CDS  | CSUB_C1315 | + | 1281881 | 1283440 | queuine tRNA-ribosyltransferase                                         | J | 519  | arCOG00989 | COG0343 |
| tRNA | CSUB_T33   | + | 1283472 | 1283545 | tRNA-Val                                                                |   |      |            |         |
| CDS  | CSUB_C1316 | + | 1283581 | 1284447 | acylphosphatase                                                         | C | 288  | arCOG01674 | COG1254 |
| CDS  | CSUB_C1317 | + | 1284489 | 1285613 | hypothetical protein                                                    | S | 374  |            |         |
| CDS  | CSUB_C1318 | + | 1285763 | 1286200 | conserved hypothetical protein                                          | S | 145  | arCOG03871 |         |
| CDS  | CSUB_C1319 | - | 1286853 | 1288238 | hypothetical protein                                                    | N | 461  | arCOG01808 | COG2064 |
| CDS  | CSUB_C1320 | - | 1288231 | 1289109 | hypothetical protein                                                    | S | 292  |            |         |
| CDS  | CSUB_C1321 | - | 1289135 | 1290712 | type II secretion system protein E                                      | N | 525  | arCOG01817 | COG0630 |
| CDS  | CSUB_C1322 | - | 1290730 | 1291068 | conserved hypothetical protein                                          | E | 112  | arCOG01459 | COG1063 |
| CDS  | CSUB_C1323 | + | 1291153 | 1291593 | UspA domain protein                                                     | T | 146  | arCOG02053 | COG0589 |
| CDS  | CSUB_C1324 | - | 1291586 | 1292038 | conserved hypothetical protein                                          | S | 150  | arCOG04234 |         |
| CDS  | CSUB_C1325 | - | 1292055 | 1292858 | zinc ABC transporter permease                                           | P | 267  | arCOG01006 | COG1108 |
| CDS  | CSUB_C1326 | - | 1292855 | 1293610 | zinc ABC transporter ATP-binding protein                                | P | 251  | arCOG00201 | COG1121 |
| CDS  | CSUB_C1327 | - | 1293594 | 1294514 | hypothetical protein                                                    | P | 306  | arCOG01005 | COG0803 |
| CDS  | CSUB_C1328 | - | 1294499 | 1294927 | metal dependent repressor, DtxR family                                  | K | 142  | arCOG02100 | COG1321 |
| CDS  | CSUB_C1329 | + | 1295060 | 1295503 | ADP-ribose pyrophosphatase                                              | L | 147  | arCOG01073 | COG0494 |
| CDS  | CSUB_C1330 | - | 1295487 | 1296446 | thiamine monophosphate kinase                                           | H | 319  | arCOG00638 | COG0611 |
| CDS  | CSUB_C1331 | - | 1296452 | 1297174 | dolichol-phosphate mannosyltransferase                                  | M | 240  | arCOG00895 | COG0463 |
| CDS  | CSUB_C1332 | - | 1297179 | 1297853 | hypothetical protein                                                    | S | 224  |            |         |
| CDS  | CSUB_C1333 | - | 1297878 | 1298303 | thioesterase superfamily protein                                        | R | 141  |            |         |
| CDS  | CSUB_C1334 | - | 1298300 | 1298713 | conserved hypothetical protein                                          | R | 137  | arCOG01283 | COG1545 |
| CDS  | CSUB_C1335 | - | 1298716 | 1299897 | thiolase                                                                | I | 393  | arCOG01281 | COG0183 |
| CDS  | CSUB_C1336 | - | 1299922 | 1302315 | carbon-monoxide dehydrogenase large subunit                             | C | 797  | arCOG01167 | COG1529 |
| CDS  | CSUB_C1337 | - | 1302332 | 1303501 | acyl-CoA dehydrogenase                                                  | I | 389  | arCOG04350 | COG1960 |
| CDS  | CSUB_C1338 | + | 1303586 | 1304986 | tryptophan synthase beta subunit                                        | R | 466  | arCOG01432 | COG1350 |
| CDS  | CSUB_C1339 | - | 1304983 | 1305672 | ERCC4-type nuclease                                                     | L | 229  | arCOG04206 | COG1948 |
| CDS  | CSUB_C1340 | + | 1305739 | 1307067 | branched-chain amino acid ABC transporter substrate-binding protein     | E | 442  | arCOG01020 | COG0683 |
| CDS  | CSUB_C1341 | + | 1307069 | 1307935 | branched-chain amino acid ABC transporter permease                      | E | 288  | arCOG01270 | COG0559 |
| CDS  | CSUB_C1342 | + | 1307935 | 1308870 | branched-chain amino acid ABC transporter permease                      | E | 311  | arCOG01274 | COG4177 |
| CDS  | CSUB_C1343 | + | 1308851 | 1309567 | branched-chain amino acid ABC transporter ATP-binding protein           | E | 238  | arCOG00926 | COG0411 |
| CDS  | CSUB_C1344 | + | 1309568 | 1310284 | branched-chain amino acid ABC transporter ATP-binding protein           | E | 238  | arCOG00924 | COG0410 |
| CDS  | CSUB_C1345 | - | 1310269 | 1311612 | amidohydrolase                                                          | F | 447  | arCOG00695 | COG0402 |
| CDS  | CSUB_C1346 | - | 1312173 | 1312811 | homing endonuclease I-ApeI                                              | L | 212  | arCOG03156 | COG3780 |
| tRNA | CSUB_R01-3 | - | 1313269 | 1313299 | 23S ribosomal RNA                                                       |   |      |            |         |
| CDS  | CSUB_C1347 | - | 1313313 | 1314401 | homing endonuclease I-ApeII                                             | L | 362  |            |         |
| tRNA | CSUB_R01-2 | - | 1314432 | 1315250 | 23S ribosomal RNA                                                       |   |      |            |         |
| CDS  | CSUB_C1348 | - | 1315213 | 1315938 | homing endonuclease                                                     | L | 241  | arCOG03158 | COG1372 |
| tRNA | CSUB_R01-1 | - | 1315942 | 1317166 | 23S ribosomal RNA                                                       |   |      |            |         |
| CDS  | CSUB_C1349 | - | 1317542 | 1318924 | dehydrogenase (flavoprotein)-like protein                               | C | 460  | arCOG00570 | COG0644 |
| CDS  | CSUB_C1350 | + | 1319055 | 1320098 | pyruvate dehydrogenase E1 component subunit alpha                       | C | 347  | arCOG01054 | COG1071 |
| CDS  | CSUB_C1351 | - | 1320082 | 1320489 | conserved hypothetical protein                                          | R | 135  | arCOG01288 | COG1545 |
| CDS  | CSUB_C1352 | - | 1320492 | 1321127 | conserved hypothetical protein                                          | R | 211  | arCOG01287 | COG1545 |
| CDS  | CSUB_C1353 | - | 1321124 | 1322278 | acetyl-CoA C-acetyltransferase                                          | I | 384  | arCOG01280 | COG0183 |
| CDS  | CSUB_C1354 | - | 1322285 | 1323385 | acetyl-CoA C-acetyltransferase                                          | I | 366  | arCOG01279 | COG0183 |
| CDS  | CSUB_C1355 | - | 1323396 | 1324538 | acyl-CoA dehydrogenase                                                  | I | 380  | arCOG04350 | COG1960 |
| CDS  | CSUB_C1356 | + | 1324596 | 1325228 | hypothetical protein                                                    | S | 210  |            |         |

|      |            |   |         |         |                                                                     |   |     |            |         |
|------|------------|---|---------|---------|---------------------------------------------------------------------|---|-----|------------|---------|
| CDS  | CSUB_C1357 | - | 1325312 | 1327312 | acetoacetyl-CoA synthetase                                          | I | 666 | arCOG06112 | COG0365 |
| tRNA | CSUB_T34   | - | 1327328 | 1327402 | tRNA-Arg                                                            |   |     |            |         |
| CDS  | CSUB_C1358 | + | 1327460 | 1328071 | hypothetical protein                                                | S | 203 |            |         |
| CDS  | CSUB_C1359 | + | 1328023 | 1328739 | cell division protein ERCT-III/CdvB                                 | N | 238 | arCOG00452 | COG5491 |
| CDS  | CSUB_C1360 | + | 1328774 | 1331710 | leucyl-tRNA synthetase                                              | J | 978 | arCOG00809 | COG0495 |
| CDS  | CSUB_C1361 | + | 1331707 | 1332063 | hypothetical protein                                                | S | 118 | arCOG01669 | COG3370 |
| CDS  | CSUB_C1362 | - | 1332060 | 1332488 | conserved hypothetical protein                                      | R | 142 | arCOG01204 | COG1708 |
| CDS  | CSUB_C1363 | - | 1332495 | 1332824 | conserved hypothetical protein                                      | S | 109 | arCOG01191 | COG2250 |
| CDS  | CSUB_C1364 | + | 1332958 | 1334019 | sulfonate/nitrate/taurine ABC transporter substrate-binding protein | S | 353 |            |         |
| CDS  | CSUB_C1365 | + | 1334053 | 1334838 | sulfonate/nitrate/taurine ABC transporter ATP-binding protein       | P | 261 | arCOG00193 | COG1116 |
| CDS  | CSUB_C1366 | + | 1334839 | 1335618 | sulfonate/nitrate/taurine ABC transporter permease                  | P | 259 | arCOG00169 | COG0600 |
| tRNA | CSUB_T35   | + | 1335660 | 1335734 | tRNA-Arg                                                            |   |     |            |         |
| CDS  | CSUB_C1367 | - | 1335804 | 1336211 | conserved hypothetical protein                                      | S | 135 | arCOG01921 | COG2083 |
| CDS  | CSUB_C1368 | + | 1336274 | 1336582 | hypothetical protein                                                | S | 102 |            |         |
| CDS  | CSUB_C1369 | + | 1336619 | 1337005 | translation initiation inhibitor                                    | J | 128 | arCOG01630 | COG0251 |
| CDS  | CSUB_C1370 | - | 1336983 | 1339109 | conserved hypothetical protein                                      | C | 708 | arCOG00336 | COG0247 |
| CDS  | CSUB_C1371 | - | 1339106 | 1339690 | conserved hypothetical protein                                      | C | 194 | arCOG00335 | COG1139 |
| CDS  | CSUB_C1372 | + | 1339772 | 1340140 | conserved hypothetical protein                                      | S | 122 | arCOG04124 | COG2835 |
| CDS  | CSUB_C1373 | - | 1340124 | 1341581 | conserved hypothetical protein                                      | M | 485 | arCOG01389 | COG1215 |
| tRNA | CSUB_T36   | - | 1341615 | 1341687 | tRNA-His                                                            |   |     |            |         |
| CDS  | CSUB_C1374 | - | 1341724 | 1342470 | dimethyladenosine tRNA methyltransferase                            | J | 248 | arCOG04131 | COG0030 |
| CDS  | CSUB_C1375 | - | 1342452 | 1342769 | hypothetical protein                                                | S | 105 |            |         |
| CDS  | CSUB_C1376 | + | 1342829 | 1343371 | Appr-1-p processing enzyme family                                   | R | 180 | arCOG04225 | COG2110 |
| CDS  | CSUB_C1377 | - | 1343316 | 1343840 | hypothetical protein                                                | S | 174 |            |         |
| CDS  | CSUB_C1378 | - | 1343843 | 1344154 | Rieske (2Fe-2S) type ferredoxin                                     | P | 103 | arCOG02853 | COG2146 |
| CDS  | CSUB_C1379 | + | 1344236 | 1345222 | thioredoxin reductase (NADPH)                                       | O | 328 | arCOG01296 | COG0492 |
| CDS  | CSUB_C1380 | - | 1345186 | 1345548 | ferredoxin                                                          | P | 120 | arCOG02852 | COG2146 |
| CDS  | CSUB_C1381 | + | 1345575 | 1346123 | methyltransferase                                                   | Q | 182 | arCOG02703 | COG0500 |
| CDS  | CSUB_C1382 | - | 1346120 | 1347598 | DNA polymerase II small subunit, family D                           | L | 492 | arCOG04455 | COG1311 |
| CDS  | CSUB_C1383 | + | 1347649 | 1348965 | hypothetical protein                                                | S | 438 |            |         |
| CDS  | CSUB_C1384 | + | 1349068 | 1349319 | hypothetical protein                                                | S | 83  |            |         |
| tRNA | CSUB_T37   | + | 1349357 | 1349431 | tRNA-Met                                                            |   |     |            |         |
| CDS  | CSUB_C1385 | - | 1349440 | 1350186 | branched-chain amino acid ABC transporter ATP-binding protein       | E | 248 | arCOG00924 | COG0410 |
| CDS  | CSUB_C1386 | - | 1350164 | 1350898 | branched-chain amino acid ABC transporter ATP-binding protein       | E | 244 | arCOG00926 | COG0411 |
| CDS  | CSUB_C1387 | - | 1350895 | 1351860 | branched-chain amino acid ABC transporter permease                  | E | 321 | arCOG01274 | COG4177 |
| CDS  | CSUB_C1388 | - | 1351864 | 1352742 | branched-chain amino acid ABC transporter permease                  | E | 292 | arCOG01270 | COG0559 |
| CDS  | CSUB_C1389 | - | 1352778 | 1354067 | branched-chain amino acid ABC transporter substrate-binding protein | E | 429 | arCOG01020 | COG0683 |
| CDS  | CSUB_C1390 | + | 1354205 | 1355536 | hypothetical protein                                                | G | 443 | arCOG00018 | COG0063 |
| CDS  | CSUB_C1391 | - | 1355517 | 1356800 | seryl-tRNA synthetase                                               | J | 427 | arCOG00403 | COG0172 |
| CDS  | CSUB_C1392 | - | 1356840 | 1358081 | conserved hypothetical protein                                      | V | 413 | arCOG02312 | COG0577 |
| CDS  | CSUB_C1393 | - | 1358068 | 1359537 | hypothetical protein                                                | M | 489 | arCOG02091 | COG1361 |
| CDS  | CSUB_C1394 | - | 1359513 | 1360037 | hypothetical protein                                                | M | 174 | arCOG02089 | COG1361 |
| CDS  | CSUB_C1395 | - | 1360034 | 1360744 | lipoprotein-releasing system ATP-binding protein                    | V | 236 | arCOG00922 | COG1136 |
| CDS  | CSUB_C1396 | - | 1360752 | 1362098 | glycine hydroxymethyltransferase                                    | E | 448 | arCOG00070 | COG0112 |
| CDS  | CSUB_C1397 | + | 1362346 | 1363623 | glutamate-1-semialdehyde-2,1-aminomutase                            | H | 425 | arCOG00918 | COG0001 |
| CDS  | CSUB_C1398 | - | 1363603 | 1364136 | NUDIX hydrolase                                                     | L | 177 | arCOG01072 | COG0494 |
| CDS  | CSUB_C1399 | - | 1364126 | 1365541 | Fe-S cluster assembly protein SuFB                                  | O | 471 | arCOG01715 | COG0719 |
| CDS  | CSUB_C1400 | + | 1365573 | 1365989 | hypothetical protein                                                | S | 138 |            |         |
| CDS  | CSUB_C1401 | + | 1366086 | 1366862 | cell division protein ERCT-III/CdvB                                 | N | 258 | arCOG00452 | COG5491 |
| CDS  | CSUB_C1402 | - | 1366859 | 1368001 | AAA family ATPase Vps4/CdvC                                         | O | 380 | arCOG01307 | COG0464 |
| CDS  | CSUB_C1403 | + | 1368156 | 1369910 | conserved hypothetical protein                                      | D | 584 | arCOG00371 | COG1196 |
| CDS  | CSUB_C1404 | + | 1369888 | 1370652 | hypothetical protein                                                | S | 254 |            |         |
| CDS  | CSUB_C1405 | + | 1370645 | 1371220 | hypothetical protein                                                | R | 191 |            |         |
| CDS  | CSUB_C1406 | - | 1371213 | 1374068 | ATP-dependent helicase                                              | S | 951 | arCOG00557 | COG1201 |
| CDS  | CSUB_C1407 | - | 1374043 | 1374615 | hypothetical protein                                                | S | 190 |            |         |
| CDS  | CSUB_C1408 | - | 1374670 | 1375875 | acyl-CoA dehydrogenase                                              | I | 401 | arCOG01707 | COG1960 |
| CDS  | CSUB_C1409 | - | 1375918 | 1376286 | hypothetical protein                                                | S | 122 |            |         |
| CDS  | CSUB_C1410 | - | 1376358 | 1377986 | thermosome beta subunit                                             | O | 542 | arCOG01257 | COG0459 |
| CDS  | CSUB_C1411 | - | 1378033 | 1378272 | archaeal histone                                                    | L | 79  | arCOG02144 | COG2036 |
| CDS  | CSUB_C1412 | + | 1378444 | 1379283 | hypothetical protein                                                | S | 279 |            |         |
| CDS  | CSUB_C1413 | + | 1379314 | 1379910 | adenylate kinase                                                    | F | 198 | arCOG01039 | COG2019 |
| CDS  | CSUB_C1414 | - | 1379907 | 1380617 | tRNA (adenine-N1-)-methyltransferase                                | J | 236 | arCOG00978 | COG2519 |
| CDS  | CSUB_C1415 | + | 1380824 | 1383424 | hypothetical protein                                                | S | 866 |            |         |
| CDS  | CSUB_C1416 | + | 1383424 | 1384506 | chorismate synthase                                                 | E | 360 | arCOG04133 | COG0082 |
| CDS  | CSUB_C1417 | + | 1384577 | 1384855 | 4a-hydroxytetrahydrobiopterin dehydratase                           | H | 92  | arCOG02939 | COG2154 |
| CDS  | CSUB_C1418 | - | 1384841 | 1385851 | phosphate uptake regulator                                          | P | 336 | arCOG00318 | COG0704 |
| CDS  | CSUB_C1419 | + | 1386020 | 1387063 | phosphate ABC transporter substrate-binding protein                 | P | 347 | arCOG00213 | COG0226 |
| CDS  | CSUB_C1420 | + | 1387074 | 1388000 | phosphate ABC transporter permease                                  | P | 308 | arCOG00167 | COG0573 |
| CDS  | CSUB_C1421 | + | 1388201 | 1388875 | phosphate ABC transporter permease                                  | P | 224 | arCOG00168 | COG0581 |
| CDS  | CSUB_C1422 | + | 1388916 | 1389707 | phosphate ABC transporter ATP-binding protein                       | P | 263 | arCOG00231 | COG1117 |
| CDS  | CSUB_C1423 | + | 1389715 | 1390347 | phosphate uptake regulator                                          | P | 210 | arCOG00232 | COG0704 |
| CDS  | CSUB_C1424 | + | 1390307 | 1390735 | metal-dependent protease, PADI/JA B1 superfamily                    | R | 142 | arCOG01139 | COG1310 |
| CDS  | CSUB_C1425 | - | 1390732 | 1391412 | triosephosphate isomerase                                           | G | 226 | arCOG01087 | COG0149 |
| CDS  | CSUB_C1426 | + | 1391484 | 1392854 | glycine dehydrogenase subunit 1                                     | E | 456 | arCOG00077 | COG0403 |
| CDS  | CSUB_C1427 | + | 1392854 | 1394380 | glycine dehydrogenase subunit 2                                     | E | 508 | arCOG00076 | COG1003 |
| CDS  | CSUB_C1428 | + | 1394358 | 1395440 | glycine cleavage system aminomethyltransferase                      | E | 360 | arCOG00756 | COG0404 |
| CDS  | CSUB_C1429 | - | 1395409 | 1396221 | hypothetical protein                                                | S | 270 | arCOG05074 |         |
| CDS  | CSUB_C1430 | + | 1396154 | 1397689 | hypothetical protein                                                | S | 511 |            |         |
| CDS  | CSUB_C1431 | + | 1397725 | 1398957 | electron transfer flavoprotein beta subunit                         | C | 410 | arCOG00448 | COG2086 |
| CDS  | CSUB_C1432 | + | 1398938 | 1400032 | electron transfer flavoprotein alpha subunit                        | C | 364 | arCOG00447 | COG2025 |
| CDS  | CSUB_C1433 | + | 1400025 | 1401713 | electron transfer flavoprotein-quinone oxidoreductase               | C | 562 | arCOG00570 | COG0644 |
| CDS  | CSUB_C1434 | + | 1401776 | 1402627 | thiosulfate sulfurtransferase                                       | P | 283 | arCOG02019 | COG2897 |
| CDS  | CSUB_C1435 | + | 1402624 | 1403280 | conserved hypothetical protein                                      | E | 218 | arCOG01303 | COG0509 |
| CDS  | CSUB_C1436 | - | 1403277 | 1403813 | tRNA-intron endonuclease                                            | J | 178 | arCOG01701 | COG1676 |
| CDS  | CSUB_C1437 | - | 1403825 | 1404490 | conserved hypothetical protein                                      | P | 221 | arCOG02640 | COG1392 |
| CDS  | CSUB_C1438 | + | 1404564 | 1405160 | molybdopterin-guanine dinucleotide biosynthesis protein A           | R | 198 | arCOG01873 | COG2068 |
| CDS  | CSUB_C1439 | - | 1405131 | 1406060 | hypothetical protein                                                | S | 309 |            |         |
| CDS  | CSUB_C1440 | + | 1406134 | 1407951 | glucosamine-fructose-6-phosphate aminotransferase (isomerizing)     | M | 605 | arCOG00057 | COG0449 |
| CDS  | CSUB_C1441 | + | 1407986 | 1408447 | hypothetical protein                                                | S | 153 | arCOG02727 | COG1673 |
| CDS  | CSUB_C1442 | - | 1408438 | 1409799 | ferredoxin-dependent glutamate synthase                             | E | 453 | arCOG00619 | COG0069 |
| CDS  | CSUB_C1443 | - | 1409796 | 1410839 | asparaginyl-tRNA synthetase                                         | J | 347 | arCOG00409 | COG0017 |
| CDS  | CSUB_C1444 | - | 1410851 | 1411345 | hypothetical protein                                                | S | 164 |            |         |
| CDS  | CSUB_C1445 | - | 1411350 | 1412840 | hypothetical protein                                                | N | 496 | arCOG01809 | COG1955 |
| CDS  | CSUB_C1446 | - | 1412837 | 1414498 | archaeal flagellar protein FlaF                                     | N | 553 | arCOG01817 | COG0630 |
| CDS  | CSUB_C1447 | - | 1414504 | 1415205 | archaeal flagellar protein FlaH                                     | N | 233 | arCOG04148 | COG2874 |
| CDS  | CSUB_C1448 | - | 1415202 | 1415699 | hypothetical protein                                                | S | 165 |            |         |
| CDS  | CSUB_C1449 | - | 1415707 | 1416195 | conserved hypothetical protein                                      | N | 162 | arCOG01822 | COG3354 |
| CDS  | CSUB_C1450 | - | 1416192 | 1416812 | hypothetical protein                                                | S | 206 |            |         |
| CDS  | CSUB_C1451 | + | 1417036 | 1417545 | archaeal flagellin FlaB                                             | N | 169 | arCOG01829 | COG1681 |
| CDS  | CSUB_C1452 | + | 1417652 | 1418320 | hypothetical protein                                                | S | 222 |            |         |
| CDS  | CSUB_C1453 | - | 1418317 | 1418829 | ATP-cobalamin adenosyltransferase                                   | H | 170 | arCOG00489 | COG2096 |
| CDS  | CSUB_C1454 | - | 1418826 | 1419953 | branched-chain amino acid ABC transporter permease                  | E | 375 | arCOG01273 | COG4177 |
| CDS  | CSUB_C1455 | - | 1419950 | 1420888 | branched-chain amino acid ABC transporter permease                  | E | 312 | arCOG01269 | COG0559 |
| CDS  | CSUB_C1456 | + | 1421003 | 1422334 | branched-chain amino acid ABC transporter substrate-binding protein | E | 443 | arCOG01021 | COG0683 |
| CDS  | CSUB_C1457 | + | 1422371 | 1423132 | branched-chain amino acid ABC transporter ATP-binding protein       | E | 253 | arCOG00925 | COG0411 |
| CDS  | CSUB_C1458 | + | 1423135 | 1423836 | branched-chain amino acid ABC transporter ATP-binding protein       | E | 233 | arCOG00924 | COG0410 |
| CDS  | CSUB_C1459 | - | 1423829 | 1424449 | HAD-superfamily hydrolase                                           | R | 206 | arCOG02291 | COG1011 |

|      |            |   |         |         |                                                               |   |     |            |         |
|------|------------|---|---------|---------|---------------------------------------------------------------|---|-----|------------|---------|
| CDS  | CSUB_C1460 | - | 1424446 | 1425456 | glyceraldehyde-3-phosphate dehydrogenase                      | G | 336 | arCOG00493 | COG0057 |
| CDS  | CSUB_C1461 | - | 1425453 | 1426673 | phosphoglycerate kinase                                       | G | 406 | arCOG00496 | COG0126 |
| tRNA | CSUB_T38   | + | 1426751 | 1426824 | tRNA-Ala                                                      |   |     |            |         |
| CDS  | CSUB_C1462 | + | 1426858 | 1427979 | glucose sorbose dehydrogenase                                 | G | 373 | arCOG02796 | COG2133 |
| CDS  | CSUB_C1463 | - | 1427969 | 1428226 | hypothetical protein                                          | S | 85  |            |         |
| CDS  | CSUB_C1464 | - | 1428255 | 1428506 | hypothetical protein                                          | S | 83  |            |         |
| CDS  | CSUB_C1465 | + | 1428524 | 1430992 | aminopeptidase N                                              | E | 822 | arCOG02969 | COG0308 |
| CDS  | CSUB_C1466 | - | 1431076 | 1431474 | signal-transduction protein                                   | R | 132 | arCOG00606 | COG0517 |
| CDS  | CSUB_C1467 | - | 1431494 | 1432288 | 4-nitrophenyl phosphatase                                     | G | 264 | arCOG04221 | COG0647 |
| CDS  | CSUB_C1468 | - | 1432296 | 1432745 | transcriptional regulator, Irp family                         | K | 149 | arCOG01580 | COG1522 |
| CDS  | CSUB_C1469 | + | 1432851 | 1433903 | conserved hypothetical protein                                | I | 350 | arCOG01767 | COG3425 |
| CDS  | CSUB_C1470 | + | 1433908 | 1435062 | acetyl-CoA C-acetyltransferase                                | V | 384 | arCOG01278 | COG0183 |
| CDS  | CSUB_C1471 | + | 1435040 | 1435462 | nucleic-acid-binding protein                                  | I | 140 | arCOG01285 | COG1545 |
| CDS  | CSUB_C1472 | - | 1435459 | 1436253 | hypothetical protein                                          | S | 264 |            |         |
| CDS  | CSUB_C1473 | - | 1436285 | 1436893 | 26S proteasome regulatory subunit N11-like protein            | R | 202 |            |         |
| CDS  | CSUB_C1474 | + | 1437034 | 1437297 | ubiquitin-like protein                                        | O | 87  |            |         |
| CDS  | CSUB_C1475 | + | 1437269 | 1437775 | ubiquitin-conjugating enzyme E2-like protein                  | O | 168 |            |         |
| CDS  | CSUB_C1476 | + | 1437775 | 1438959 | ubiquitin-activating enzyme E1-like protein                   | O | 394 |            |         |
| CDS  | CSUB_C1477 | + | 1438943 | 1439170 | hypothetical protein                                          | S | 75  |            |         |
| CDS  | CSUB_C1478 | + | 1439172 | 1439483 | hypothetical protein                                          | S | 103 |            |         |
| CDS  | CSUB_C1479 | - | 1439478 | 1440332 | hypothetical protein                                          | S | 284 | arCOG00372 |         |
| CDS  | CSUB_C1480 | + | 1440379 | 1441131 | hypothetical protein                                          | S | 250 |            |         |
| CDS  | CSUB_C1481 | + | 1441143 | 1442591 | glycyl-tRNA synthetase                                        | J | 482 | arCOG00405 | COG0423 |
| CDS  | CSUB_C1482 | + | 1442613 | 1442987 | NADH dehydrogenase I subunit A                                | C | 124 | arCOG01557 | COG0838 |
| CDS  | CSUB_C1483 | + | 1442992 | 1444023 | NADH dehydrogenase I subunit H                                | C | 343 | arCOG01546 | COG1005 |
| CDS  | CSUB_C1484 | - | 1444020 | 1444376 | hypothetical protein                                          | S | 118 |            |         |
| CDS  | CSUB_C1485 | - | 1444379 | 1445287 | hypothetical protein                                          | C | 302 | arCOG01543 | COG1143 |
| CDS  | CSUB_C1486 | - | 1445578 | 1447152 | cytochrome c oxidase subunit I                                | C | 524 | arCOG01237 | COG0843 |
| CDS  | CSUB_C1487 | - | 1447149 | 1447565 | cytochrome c oxidase subunit II                               | C | 138 | arCOG01235 | COG1622 |
| CDS  | CSUB_C1488 | - | 1447570 | 1447803 | conserved hypothetical protein                                | S | 77  | arCOG07020 |         |
| CDS  | CSUB_C1489 | - | 1447796 | 1448254 | cytochrome AA3 controlling protein                            | O | 152 | arCOG03103 | COG1612 |
| CDS  | CSUB_C1490 | - | 1448282 | 1449169 | luciferase family protein                                     | C | 295 | arCOG02410 | COG2141 |
| CDS  | CSUB_C1491 | - | 1449166 | 1450527 | phosphomethylpyrimidine kinase                                | H | 453 | arCOG00020 | COG0351 |
| CDS  | CSUB_C1492 | - | 1450514 | 1451779 | conserved hypothetical protein                                | S | 421 |            |         |
| CDS  | CSUB_C1493 | - | 1451791 | 1452345 | conserved hypothetical protein                                | S | 184 | arCOG04316 |         |
| CDS  | CSUB_C1494 | - | 1452342 | 1452923 | conserved hypothetical protein                                | S | 193 | arCOG04317 | COG4732 |
| CDS  | CSUB_C1495 | - | 1453109 | 1453375 | conserved hypothetical protein                                | M | 88  | arCOG00894 | COG0463 |
| CDS  | CSUB_C1496 | - | 1453380 | 1454471 | DNA polymerase IV                                             | L | 363 | arCOG04582 | COG0389 |
| CDS  | CSUB_C1497 | + | 1454525 | 1455478 | acetoin utilization protein AcuC                              | R | 317 | arCOG00324 | COG0123 |
| CDS  | CSUB_C1498 | + | 1455462 | 1456094 | conserved hypothetical protein                                | L | 210 | arCOG00928 | COG1628 |
| CDS  | CSUB_C1499 | - | 1456026 | 1457075 | bifunctional protein GlmU                                     | M | 349 | arCOG00666 | COG1208 |
| CDS  | CSUB_C1500 | + | 1457117 | 1458124 | diphthine synthase                                            | J | 335 | arCOG04161 | COG1798 |
| CDS  | CSUB_C1501 | + | 1458121 | 1458576 | glycerol-3-phosphate cytidylyltransferase                     | M | 151 | arCOG01222 | COG0615 |
| CDS  | CSUB_C1502 | - | 1458669 | 1459268 | riboflavin kinase, archaea type                               | K | 199 | arCOG01904 | COG1339 |
| CDS  | CSUB_C1503 | - | 1459349 | 1459954 | proteasome beta subunit                                       | O | 201 | arCOG00970 | COG0638 |
| CDS  | CSUB_C1504 | + | 1460040 | 1461122 | RNA 3'-terminal phosphate cyclase                             | J | 360 | arCOG04125 | COG0430 |
| CDS  | CSUB_C1505 | + | 1461141 | 1461656 | nicotinamide-nucleotide adenylyltransferase                   | H | 171 | arCOG00972 | COG1056 |
| CDS  | CSUB_C1506 | - | 1461640 | 1462431 | conserved hypothetical protein                                | S | 263 | arCOG04309 | COG1912 |
| CDS  | CSUB_C1507 | + | 1462465 | 1462821 | peptidyl-tRNA hydrolase, PTH2 family                          | J | 118 | arCOG04228 | COG1990 |
| CDS  | CSUB_C1508 | + | 1462833 | 1463516 | rhomboid family protein                                       | E | 227 | arCOG01768 | COG0705 |
| CDS  | CSUB_C1509 | + | 1463707 | 1464213 | NADH dehydrogenase I subunit B                                | C | 168 | arCOG01554 | COG0377 |
| CDS  | CSUB_C1510 | + | 1464213 | 1464698 | NADH dehydrogenase I subunit C                                | C | 161 | arCOG01551 | COG0852 |
| CDS  | CSUB_C1511 | + | 1464711 | 1465928 | NADH dehydrogenase I subunit D                                | C | 405 | arCOG01548 | COG0649 |
| CDS  | CSUB_C1512 | - | 1465931 | 1468414 | DNA polymerase I, family B                                    | L | 827 | arCOG00328 | COG0417 |
| CDS  | CSUB_C1513 | - | 1468439 | 1469326 | agmatinase                                                    | E | 295 | arCOG01700 | COG0010 |
| CDS  | CSUB_C1514 | + | 1469374 | 1471587 | hypothetical protein                                          | S | 737 |            |         |
| CDS  | CSUB_C1515 | - | 1471580 | 1472035 | conserved hypothetical protein                                | S | 151 | arCOG02285 | COG3270 |
| CDS  | CSUB_C1516 | - | 1472045 | 1473007 | tRNA and rRNA cytosine-C5-methylases                          | J | 320 | arCOG00973 | COG0144 |
| CDS  | CSUB_C1517 | - | 1472974 | 1473597 | N-glycosylase/DNA lyase                                       | L | 207 | arCOG04357 | COG1059 |
| CDS  | CSUB_C1518 | - | 1473594 | 1475060 | conserved hypothetical protein                                | L | 488 | arCOG00280 | COG0433 |
| CDS  | CSUB_C1519 | - | 1475068 | 1476156 | hypothetical protein                                          | S | 362 |            |         |
| CDS  | CSUB_C1520 | + | 1476157 | 1476561 | conserved hypothetical protein                                | S | 134 |            |         |
| CDS  | CSUB_C1521 | - | 1476531 | 1477010 | hypothetical protein                                          | S | 159 |            |         |
| CDS  | CSUB_C1522 | - | 1477011 | 1477481 | hypothetical protein                                          | S | 156 |            |         |
| CDS  | CSUB_C1523 | + | 1477519 | 1477797 | conserved hypothetical protein                                | K | 92  | arCOG04189 | COG5625 |
| CDS  | CSUB_C1524 | - | 1477798 | 1478007 | hypothetical protein                                          | S | 69  |            |         |
| CDS  | CSUB_C1525 | - | 1478032 | 1479231 | coenzyme F420-dependent hydrogenase beta subunit              | C | 399 | arCOG02650 | COG1035 |
| CDS  | CSUB_C1526 | - | 1479270 | 1479812 | conserved hypothetical protein                                | S | 180 | arCOG07179 |         |
| tRNA | CSUB_T39   | - | 1479835 | 1479909 | tRNA-Ile                                                      |   |     |            |         |
| CDS  | CSUB_C1527 | + | 1480023 | 1480448 | ferredoxin                                                    | C | 141 | arCOG04548 | COG1146 |
| CDS  | CSUB_C1528 | + | 1480483 | 1481163 | conserved hypothetical protein                                | R | 226 | arCOG04250 | COG3382 |
| tRNA | CSUB_T40   | - | 1481167 | 1481241 | tRNA-Glu                                                      |   |     |            |         |
| CDS  | CSUB_C1529 | + | 1481323 | 1481778 | conserved hypothetical protein                                | R | 151 | arCOG00606 | COG0517 |
| CDS  | CSUB_C1530 | - | 1481770 | 1483542 | aldehyde:ferredoxin oxidoreductase                            | C | 590 | arCOG00706 | COG2414 |
| CDS  | CSUB_C1531 | + | 1483599 | 1484570 | aldo/keto reductase                                           | R | 323 | arCOG01618 | COG0656 |
| CDS  | CSUB_C1532 | + | 1484605 | 1485438 | hypothetical protein                                          | S | 277 |            |         |
| CDS  | CSUB_C1533 | - | 1485418 | 1485753 | hypothetical protein                                          | S | 111 |            |         |
| CDS  | CSUB_C1534 | - | 1485840 | 1486217 | hypothetical protein                                          | S | 125 |            |         |
| CDS  | CSUB_C1535 | - | 1486224 | 1486628 | hypothetical protein                                          | S | 134 |            |         |
| CDS  | CSUB_C1536 | - | 1486715 | 1487116 | hypothetical protein                                          | O | 133 | arCOG01832 | COG0071 |
| CDS  | CSUB_C1537 | - | 1487123 | 1487872 | conserved hypothetical protein                                | R | 249 | arCOG00347 | COG1938 |
| CDS  | CSUB_C1538 | + | 1487963 | 1489966 | acetyl-CoA synthetase                                         | I | 667 | arCOG04201 | COG0365 |
| CDS  | CSUB_C1539 | + | 1489956 | 1490681 | 5-formyltetrahydrofolate cyclo-ligase                         | H | 241 | arCOG00474 | COG0212 |
| CDS  | CSUB_C1540 | - | 1490662 | 1491678 | mannose-6-phosphate isomerase / glucose-6-phosphate isomerase | G | 338 | arCOG00052 | COG0166 |
| CDS  | CSUB_C1541 | - | 1491703 | 1492497 | competence/damage-inducible protein CinA                      | R | 264 | arCOG00215 | COG1058 |
| CDS  | CSUB_C1542 | - | 1492503 | 1493156 | conserved hypothetical protein                                | R | 217 | arCOG01145 | COG2129 |
| CDS  | CSUB_C1543 | + | 1493236 | 1493814 | hypothetical protein                                          | R | 192 | arCOG00606 | COG0517 |
| CDS  | CSUB_C1544 | + | 1493811 | 1494755 | D-isomer specific 2-hydroxyacid dehydrogenase, NAD-binding    | C | 314 | arCOG01756 | COG1052 |
| tRNA | CSUB_T41   | + | 1494783 | 1494890 | tRNA-Ser                                                      |   |     |            |         |
| CDS  | CSUB_C1545 | - | 1494946 | 1495296 | transcriptional regulator, MarR family                        | K | 116 | arCOG01057 | COG1733 |
| CDS  | CSUB_C1546 | + | 1495332 | 1495844 | conserved hypothetical protein                                | S | 170 |            |         |
| CDS  | CSUB_C1547 | + | 1495883 | 1496389 | DtxR family iron dependent repressor                          | K | 168 | arCOG02100 | COG1321 |
| CDS  | CSUB_C1548 | + | 1496453 | 1497841 | 2-isopropylmalate synthase                                    | E | 462 | arCOG02092 | COG0119 |
| CDS  | CSUB_C1549 | - | 1497838 | 1498260 | signal-transduction protein                                   | R | 140 | arCOG00606 | COG0517 |
| CDS  | CSUB_C1550 | + | 1498262 | 1498564 | large subunit ribosomal protein L44e                          | J | 100 | arCOG04109 | COG1631 |
| CDS  | CSUB_C1551 | + | 1498608 | 1498808 | small subunit ribosomal protein S27e                          | J | 66  | arCOG04108 | COG2051 |
| CDS  | CSUB_C1552 | + | 1498801 | 1499565 | translation initiation factor eIF-2 alpha subunit             | J | 254 | arCOG04107 | COG1093 |
| CDS  | CSUB_C1553 | - | 1499552 | 1499884 | hypothetical protein                                          | S | 110 |            |         |
| CDS  | CSUB_C1554 | + | 1499929 | 1500681 | hypothetical protein                                          | R | 250 | arCOG02050 | COG0730 |
| CDS  | CSUB_C1555 | - | 1500676 | 1501308 | peptidase M50                                                 | R | 210 | arCOG00614 | COG1994 |
| CDS  | CSUB_C1556 | + | 1501501 | 1501926 | conserved hypothetical protein                                | O | 141 | arCOG01832 | COG0071 |
| CDS  | CSUB_C1557 | + | 1501930 | 1503519 | ATP dependent DNA ligase I                                    | L | 529 | arCOG01347 | COG1793 |
| CDS  | CSUB_C1558 | + | 1503586 | 1504161 | hypothetical protein                                          | S | 191 |            |         |
| CDS  | CSUB_C1559 | + | 1504369 | 1504734 | methionyl-tRNA synthetase                                     | R | 121 | arCOG01136 | COG0073 |
| CDS  | CSUB_C1560 | + | 1504768 | 1506057 | asparaginyl-tRNA synthetase                                   | J | 429 | arCOG00407 | COG0017 |
| CDS  | CSUB_C1561 | + | 1506054 | 1506608 | conserved hypothetical protein                                | J | 184 | arCOG00109 | COG2890 |
| CDS  | CSUB_C1562 | + | 1506618 | 1508492 | basic amino acid/polyamine antiporter, APA family             | E | 624 | arCOG00009 | COG0531 |

|      |            |   |         |         |                                                                  |   |     |            |         |
|------|------------|---|---------|---------|------------------------------------------------------------------|---|-----|------------|---------|
| CDS  | CSUB_C1563 | + | 1508494 | 1508769 | transcriptional regulator, AsnC family                           | K | 91  | arCOG01580 | COG1522 |
| CDS  | CSUB_C1564 | - | 1509037 | 1510275 | molybdopterin biosynthesis protein MoeA                          | H | 412 | arCOG00216 | COG0303 |
| CDS  | CSUB_C1565 | + | 1510332 | 1511183 | carbon monoxide dehydrogenase F protein                          | R | 283 | arCOG01929 | COG1975 |
| CDS  | CSUB_C1566 | - | 1511152 | 1512300 | VWA containing CoxE family protein                               | O | 382 | arCOG06502 | COG3552 |
| CDS  | CSUB_C1567 | + | 1512303 | 1513172 | ATPase                                                           | R | 289 | arCOG00441 | COG0714 |
| CDS  | CSUB_C1568 | - | 1513265 | 1514140 | molybdopterin dehydrogenase FAD-binding                          | C | 291 | arCOG01926 | COG1319 |
| CDS  | CSUB_C1569 | + | 1514151 | 1514690 | (2Fe-2S)-binding domain protein                                  | C | 179 | arCOG01925 | COG2080 |
| CDS  | CSUB_C1570 | + | 1514695 | 1515150 | carbon monoxide dehydrogenase subunit G like protein             | C | 151 | arCOG01927 | COG3427 |
| CDS  | CSUB_C1571 | + | 1515206 | 1517392 | elongation factor EF-2                                           | J | 728 | arCOG01559 | COG0480 |
| CDS  | CSUB_C1572 | - | 1517396 | 1518295 | conserved hypothetical protein                                   | S | 299 | arCOG01159 | COG1340 |
| CDS  | CSUB_C1573 | - | 1518292 | 1519062 | conserved hypothetical protein                                   | R | 256 | arCOG01225 | COG1100 |
| CDS  | CSUB_C1574 | + | 1519276 | 1520607 | aspartyl-tRNA(Asn)/glutamyl-tRNA(Gln) amidotransferase subunit A | J | 443 | arCOG01717 | COG0154 |
| CDS  | CSUB_C1575 | + | 1520898 | 1521632 | proteasome alpha subunit                                         | O | 244 | arCOG00971 | COG0638 |
| CDS  | CSUB_C1576 | + | 1521644 | 1522342 | conserved hypothetical protein                                   | J | 232 | arCOG04187 | COG1500 |
| CDS  | CSUB_C1577 | + | 1522344 | 1523015 | exosome complex component RRP4                                   | J | 223 | arCOG00678 | COG1097 |
| CDS  | CSUB_C1578 | + | 1522984 | 1523724 | exosome complex component RRP41                                  | J | 246 | arCOG01575 | COG0689 |
| CDS  | CSUB_C1579 | + | 1523733 | 1524548 | exosome complex component RRP42                                  | J | 271 | arCOG01574 | COG2123 |
| CDS  | CSUB_C1580 | + | 1524532 | 1524762 | large subunit ribosomal protein L37Ac                            | J | 76  | arCOG04208 | COG1997 |
| CDS  | CSUB_C1581 | + | 1524763 | 1525014 | conserved hypothetical protein                                   | S | 83  | arCOG04414 | COG2892 |
| CDS  | CSUB_C1582 | + | 1525007 | 1525372 | prefoldin beta subunit                                           | O | 121 | arCOG01342 | COG1382 |
| CDS  | CSUB_C1583 | + | 1525417 | 1526424 | conserved hypothetical protein                                   | R | 335 | arCOG01565 | COG0618 |
| CDS  | CSUB_C1584 | + | 1526428 | 1527276 | cobalt/nickel ABC transporter ATP-binding protein                | P | 282 | arCOG00188 | COG1122 |
| CDS  | CSUB_C1585 | + | 1527281 | 1528087 | cobalt/nickel ABC transporter ATP-binding protein                | P | 268 | arCOG00202 | COG1122 |
| CDS  | CSUB_C1586 | + | 1528074 | 1528871 | cobalt/nickel ABC transporter permease                           | P | 265 | arCOG02250 | COG0619 |
| CDS  | CSUB_C1587 | - | 1528868 | 1529431 | transcription initiation factor TFIIID TATA-box-binding protein  | K | 187 | arCOG01764 | COG2101 |
| CDS  | CSUB_C1588 | - | 1529454 | 1530131 | lipoyl(octanoyl) transferase                                     | H | 225 | arCOG01942 | COG0321 |
| CDS  | CSUB_C1589 | - | 1530118 | 1531497 | dihydroliipoamide dehydrogenase                                  | C | 459 | arCOG01068 | COG1249 |
| CDS  | CSUB_C1590 | - | 1531511 | 1532485 | 2-oxoisovalerate dehydrogenase E1 component, beta subunit        | C | 324 | arCOG01052 | COG0022 |
| CDS  | CSUB_C1591 | - | 1532491 | 1533366 | lipoic acid synthetase                                           | H | 291 | arCOG00660 | COG0320 |
| CDS  | CSUB_C1592 | + | 1533433 | 1533876 | NUDX hydrolase                                                   | L | 147 | arCOG01078 | COG0494 |
| CDS  | CSUB_C1593 | + | 1533903 | 1535600 | hypothetical protein                                             | S | 565 |            |         |
| CDS  | CSUB_C1594 | + | 1535644 | 1535943 | conserved hypothetical protein                                   | S | 99  | arCOG05464 |         |
| CDS  | CSUB_C1595 | + | 1535943 | 1536707 | F420-O-gamma-glutamyl ligase                                     | H | 254 | arCOG02714 | COG1478 |
| CDS  | CSUB_C1596 | + | 1536781 | 1537401 | conserved hypothetical protein                                   | S | 206 | arCOG03727 |         |
| CDS  | CSUB_C1597 | + | 1537403 | 1537894 | histidine triad (HIT) protein (hit)                              | F | 163 | arCOG00419 | COG0537 |
| CDS  | CSUB_C1598 | - | 1537872 | 1538885 | tRNA-modifying enzyme                                            | C | 337 | arCOG04174 | COG0731 |
| CDS  | CSUB_C1599 | + | 1538935 | 1539804 | conserved hypothetical protein                                   | G | 289 | arCOG00016 | COG0524 |
| CDS  | CSUB_C1600 | - | 1539743 | 1540051 | conserved hypothetical protein                                   | S | 102 | arCOG04886 |         |
| CDS  | CSUB_C1601 | - | 1540476 | 1540928 | S-adenosylmethionine decarboxylase                               | E | 150 | arCOG00279 | COG1586 |
| CDS  | CSUB_C1602 | + | 1541062 | 1541502 | molybdenum cofactor biosynthesis protein E                       | H | 146 | arCOG00534 | COG0314 |
| CDS  | CSUB_C1603 | + | 1541484 | 1541813 | molybdenum cofactor biosynthesis protein D                       | H | 109 | arCOG00536 | COG1977 |
| CDS  | CSUB_C1604 | - | 1541774 | 1542292 | dCTP deaminase                                                   | F | 172 | arCOG04048 | COG0717 |
| CDS  | CSUB_C1605 | - | 1542317 | 1543105 | conserved hypothetical protein                                   | R | 262 | arCOG00500 | COG1234 |
| CDS  | CSUB_C1606 | - | 1543102 | 1543626 | molybdenum cofactor biosynthesis protein B                       | H | 174 | arCOG00214 | COG0521 |
| CDS  | CSUB_C1607 | - | 1543613 | 1544041 | molybdenum cofactor biosynthesis protein C                       | H | 142 | arCOG01530 | COG0315 |
| CDS  | CSUB_C1608 | - | 1544100 | 1544543 | small subunit ribosomal protein S11                              | J | 147 | arCOG04240 | COG0100 |
| CDS  | CSUB_C1609 | - | 1544588 | 1545100 | small subunit ribosomal protein S4                               | J | 170 | arCOG04239 | COG0522 |
| CDS  | CSUB_C1610 | + | 1545168 | 1546307 | geranylgeranyl reductase                                         | C | 379 | arCOG00570 | COG0644 |
| CDS  | CSUB_C1611 | - | 1546282 | 1547592 | peptidase M20                                                    | E | 436 | arCOG01110 | COG0624 |
| CDS  | CSUB_C1612 | + | 1547679 | 1548269 | isochorismatase                                                  | Q | 196 | arCOG01943 | COG1335 |
| CDS  | CSUB_C1613 | + | 1548266 | 1549477 | nicotinate phosphoribosyltransferase                             | H | 403 | arCOG01481 | COG1488 |
| CDS  | CSUB_C1614 | - | 1549467 | 1550864 | fumarate hydratase, class II                                     | C | 465 | arCOG01749 | COG0114 |
| CDS  | CSUB_C1615 | - | 1550895 | 1551926 | glycerol-1-phosphate dehydrogenase [NAD(P)]                      | C | 343 | arCOG00982 | COG0371 |
| CDS  | CSUB_C1616 | + | 1551979 | 1552809 | conserved hypothetical protein                                   | S | 276 | arCOG00021 | COG1992 |
| CDS  | CSUB_C1617 | - | 1552907 | 1553278 | conserved hypothetical protein                                   | R | 123 | arCOG00017 | COG2522 |
| CDS  | CSUB_C1618 | - | 1553324 | 1554127 | conserved hypothetical protein                                   | S | 267 | arCOG01616 | COG1650 |
| CDS  | CSUB_C1619 | + | 1554160 | 1555011 | SAM-dependent methyltransferase                                  | R | 283 | arCOG00054 | COG2521 |
| CDS  | CSUB_C1620 | + | 1555038 | 1556666 | lysyl-tRNA synthetase, class I                                   | J | 542 | arCOG00485 | COG1384 |
| CDS  | CSUB_C1621 | + | 1556663 | 1557091 | replication factor A1                                            | L | 142 | arCOG01510 | COG1599 |
| CDS  | CSUB_C1622 | - | 1557084 | 1558352 | membrane-bound serine protease NfeD                              | O | 422 | arCOG01910 | COG1030 |
| CDS  | CSUB_C1623 | - | 1558349 | 1559161 | membrane protease subunit                                        | O | 270 | arCOG01915 | COG0330 |
| CDS  | CSUB_C1624 | + | 1559380 | 1560735 | conserved hypothetical protein                                   | S | 451 |            |         |
| CDS  | CSUB_C1625 | + | 1560742 | 1561119 | hypothetical protein                                             | S | 125 |            |         |
| CDS  | CSUB_C1626 | + | 1561119 | 1561547 | conserved hypothetical protein                                   | L | 142 | arCOG00919 | COG1591 |
| CDS  | CSUB_C1627 | + | 1561537 | 1561983 | transcriptional regulator, AsnC family                           | K | 148 | arCOG01580 | COG1522 |
| CDS  | CSUB_C1628 | + | 1562144 | 1563319 | serine hydroxymethyltransferase                                  | E | 391 | arCOG00070 | COG0112 |
| CDS  | CSUB_C1629 | + | 1563332 | 1564294 | diphosphomevalonate decarboxylase                                | I | 320 | arCOG02937 | COG3407 |
| CDS  | CSUB_C1630 | + | 1564337 | 1564510 | hypothetical protein                                             | S | 57  |            |         |
| CDS  | CSUB_C1631 | - | 1564507 | 1564782 | conserved hypothetical protein                                   | K | 91  | arCOG01055 | COG3432 |
| CDS  | CSUB_C1632 | - | 1564766 | 1565395 | hypothetical protein                                             | S | 209 |            |         |
| CDS  | CSUB_C1633 | - | 1565413 | 1565913 | hypothetical protein                                             | S | 166 |            |         |
| CDS  | CSUB_C1634 | - | 1565953 | 1566921 | 2-oxoglutarate ferredoxin oxidoreductase subunit beta            | C | 322 | arCOG01599 | COG1013 |
| CDS  | CSUB_C1635 | - | 1566932 | 1568887 | 2-oxoglutarate ferredoxin oxidoreductase subunit alpha           | C | 651 | arCOG01606 | COG0674 |
| CDS  | CSUB_C1636 | - | 1568938 | 1569513 | small heat shock protein HSP20                                   | O | 191 | arCOG01833 | COG0071 |
| CDS  | CSUB_C1637 | + | 1569571 | 1570725 | glycosyl transferase family 2                                    | M | 384 | arCOG01390 | COG0463 |
| CDS  | CSUB_C1638 | - | 1570706 | 1571653 | modification methyltransferase                                   | L | 315 | arCOG00890 | COG0863 |
| CDS  | CSUB_C1639 | - | 1571837 | 1572349 | protease I                                                       | R | 170 | arCOG00769 | COG0693 |
| CDS  | CSUB_C1640 | + | 1572372 | 1572725 | conserved hypothetical protein                                   | R | 117 | arCOG01845 | COG2151 |
| CDS  | CSUB_C1641 | + | 1572761 | 1575088 | valyl tRNA-synthetase                                            | J | 775 | arCOG00808 | COG0525 |
| CDS  | CSUB_C1642 | + | 1575085 | 1575573 | conserved hypothetical protein                                   | F | 162 | arCOG01075 | COG1051 |
| CDS  | CSUB_C1643 | - | 1575500 | 1576720 | hypothetical protein                                             | S | 406 |            |         |
| CDS  | CSUB_C1644 | + | 1576823 | 1577686 | hypothetical protein                                             | S | 287 |            |         |
| CDS  | CSUB_C1645 | + | 1577713 | 1578558 | protoheme IX farnesyltransferase                                 | O | 281 | arCOG00479 | COG0109 |
| CDS  | CSUB_C1646 | - | 1578553 | 1579263 | sugar fermentation stimulation protein A                         | R | 236 | arCOG04115 | COG1489 |
| CDS  | CSUB_C1647 | - | 1579250 | 1580392 | citrate synthase                                                 | C | 380 | arCOG04237 | COG0372 |
| CDS  | CSUB_C1648 | - | 1580430 | 1582136 | long-chain-fatty-acid-CoA ligase                                 | I | 568 | arCOG00856 | COG0318 |
| CDS  | CSUB_C1649 | + | 1582209 | 1582571 | conserved hypothetical protein                                   | S | 120 |            |         |
| CDS  | CSUB_C1650 | - | 1582548 | 1583330 | SAM-dependent methyltransferase                                  | J | 260 | arCOG00033 | COG2520 |
| CDS  | CSUB_C1651 | + | 1583395 | 1583760 | small subunit ribosomal protein S25c                             | J | 121 | arCOG04327 | COG4901 |
| CDS  | CSUB_C1652 | - | 1583729 | 1584103 | conserved hypothetical protein                                   | S | 124 | arCOG04488 | COG2164 |
| CDS  | CSUB_C1653 | - | 1584100 | 1585329 | phosphoglycerate mutase                                          | G | 409 | arCOG01696 | COG3635 |
| CDS  | CSUB_C1654 | + | 1585399 | 1586361 | DNA repair protein RadA                                          | L | 320 | arCOG00415 | COG0468 |
| CDS  | CSUB_C1655 | + | 1586362 | 1586730 | hypothetical protein                                             | S | 122 |            |         |
| CDS  | CSUB_C1656 | - | 1586702 | 1586977 | hypothetical protein                                             | R | 91  |            |         |
| CDS  | CSUB_C1657 | + | 1587044 | 1588930 | conserved hypothetical protein                                   | K | 628 | arCOG01695 | COG1293 |
| CDS  | CSUB_C1658 | + | 1588936 | 1589526 | CBS-domain-containing protein                                    | R | 196 | arCOG00606 | COG0517 |
| CDS  | CSUB_C1659 | + | 1589523 | 1589960 | conserved hypothetical protein                                   | R | 145 | arCOG04290 | COG1656 |
| CDS  | CSUB_C1660 | + | 1589968 | 1590618 | conserved hypothetical protein                                   | S | 216 | arCOG01336 | COG2078 |
| CDS  | CSUB_C1661 | + | 1590551 | 1591699 | glycosyltransferase family 28                                    | G | 382 | arCOG01393 | COG1819 |
| CDS  | CSUB_C1662 | + | 1591749 | 1592267 | conserved hypothetical protein                                   | S | 172 | arCOG05379 | COG4754 |
| CDS  | CSUB_C1663 | - | 1592251 | 1593012 | sulfonate/nitrate/taurine ABC transporter ATP binding protein    | P | 253 | arCOG00193 | COG1116 |
| CDS  | CSUB_C1664 | - | 1593051 | 1594604 | sulfonate/nitrate/taurine ABC transporter permease               | P | 517 | arCOG00174 | COG4986 |
| CDS  | CSUB_C1665 | - | 1594632 | 1595570 | octapentyl-diphosphate synthase                                  | H | 312 | arCOG01726 | COG0142 |
| CDS  | CSUB_C1666 | - | 1595612 | 1596019 | thioredoxin I                                                    | O | 135 | arCOG01972 | COG0526 |
| CDS  | CSUB_C1667 | + | 1596098 | 1596382 | hypothetical protein                                             | S | 94  |            |         |
| tRNA | CSUB_T42   | + | 1596424 | 1596497 | tRNA-Thr                                                         |   |     |            |         |
| CDS  | CSUB_C1668 | - | 1596502 | 1597584 | histidinol-phosphate aminotransferase                            | E | 360 | arCOG04273 | COG0079 |



|      |            |   |         |         |                                                                     |   |     |            |         |  |  |
|------|------------|---|---------|---------|---------------------------------------------------------------------|---|-----|------------|---------|--|--|
| tRNA | CSUB_T43   | + | 1597664 | 1597738 | tRNA-Lys                                                            |   |     |            |         |  |  |
| CDS  | CSUB_C1669 | + | 1598082 | 1598588 | transcription factor E                                              | K | 168 | arCOG04270 | COG1675 |  |  |
| CDS  | CSUB_C1670 | + | 1598585 | 1599151 | conserved hypothetical protein                                      | R | 188 | arCOG01857 | COG1303 |  |  |
| CDS  | CSUB_C1671 | - | 1599110 | 1601149 | V-type H <sup>+</sup> -transporting ATPase subunit I                | C | 679 | arCOG04138 | COG1269 |  |  |
| CDS  | CSUB_C1672 | + | 1601261 | 1601509 | hypothetical protein                                                | S | 82  |            |         |  |  |
| CDS  | CSUB_C1673 | + | 1601506 | 1601766 | hypothetical protein                                                | S | 86  |            |         |  |  |
| CDS  | CSUB_C1674 | + | 1601768 | 1602085 | NADH dehydrogenase I subunit K                                      | P | 105 | arCOG03072 | COG1006 |  |  |
| CDS  | CSUB_C1675 | - | 1602082 | 1602738 | hypothetical protein                                                | S | 218 |            |         |  |  |
| CDS  | CSUB_C1676 | - | 1602735 | 1603493 | calcineurin superfamily phosphohydrolase                            | R | 252 | arCOG01153 | COG1409 |  |  |
| CDS  | CSUB_C1677 | + | 1603594 | 1604037 | coenzyme A-binding protein                                          | R | 147 | arCOG04227 | COG1832 |  |  |
| CDS  | CSUB_C1678 | + | 1604074 | 1605156 | pyruvate formate-lyase activating enzyme                            | O | 360 | arCOG00946 | COG1180 |  |  |
| tRNA | CSUB_T44   | - | 1605156 | 1605281 | tRNA-Thr                                                            |   |     |            |         |  |  |
| CDS  | CSUB_C1679 | - | 1605595 | 1606407 | hypothetical protein                                                | S | 270 |            |         |  |  |
| CDS  | CSUB_C1680 | + | 1607046 | 1608452 | hypothetical protein                                                | F | 468 | arCOG01883 | COG1351 |  |  |
| CDS  | CSUB_C1681 | + | 1608449 | 1608919 | 6-pyruvoyl tetrahydrobiopterin synthase                             | H | 156 | arCOG02172 | COG0720 |  |  |
| CDS  | CSUB_C1682 | + | 1608916 | 1609566 | transcription regulator ExsB related protein                        | R | 216 | arCOG00039 | COG0603 |  |  |
| CDS  | CSUB_C1683 | + | 1609602 | 1610405 | NAD <sup>+</sup> kinase                                             | H | 267 | arCOG01348 | COG0061 |  |  |
| CDS  | CSUB_C1684 | + | 1610392 | 1610898 | conserved hypothetical protein                                      | V | 168 | arCOG00721 | COG1439 |  |  |
| CDS  | CSUB_C1685 | - | 1610885 | 1611439 | conserved hypothetical protein                                      | S | 184 | arCOG02008 | COG3371 |  |  |
| CDS  | CSUB_C1686 | + | 1611549 | 1612082 | hypothetical protein                                                | S | 177 |            |         |  |  |
| CDS  | CSUB_C1687 | + | 1612130 | 1612510 | hypothetical protein                                                | S | 126 |            |         |  |  |
| CDS  | CSUB_C1688 | + | 1612558 | 1614090 | GMP synthase (glutamine-hydrolysing)                                | F | 510 | arCOG00085 | COG0519 |  |  |
| CDS  | CSUB_C1689 | - | 1614092 | 1614898 | enoyl-CoA hydratase                                                 | I | 268 | arCOG00239 | COG1024 |  |  |
| CDS  | CSUB_C1690 | - | 1614951 | 1615478 | hypothetical protein                                                | S | 175 |            |         |  |  |
| CDS  | CSUB_C1691 | + | 1615633 | 1616031 | S-adenosylmethionine decarboxylase                                  | E | 132 | arCOG00279 | COG1586 |  |  |
| CDS  | CSUB_C1692 | + | 1616024 | 1616935 | spermidine synthase                                                 | S | 303 | arCOG00050 | COG0421 |  |  |
| CDS  | CSUB_C1693 | - | 1616974 | 1617618 | phosphonate ABC transporter permease                                | P | 214 | arCOG00173 | COG3639 |  |  |
| CDS  | CSUB_C1694 | - | 1617748 | 1618464 | phosphonate ABC transporter ATP-binding protein                     | L | 238 | arCOG00206 | COG3638 |  |  |
| CDS  | CSUB_C1695 | - | 1618466 | 1619422 | phosphonate ABC transporter substrate-binding protein               | P | 318 | arCOG01805 | COG3221 |  |  |
| CDS  | CSUB_C1696 | + | 1619529 | 1620272 | conserved hypothetical protein                                      | R | 247 | arCOG00017 | COG2522 |  |  |
| CDS  | CSUB_C1697 | - | 1620238 | 1621071 | manganese/iron ABC transporter permease                             | P | 277 | arCOG01006 | COG1108 |  |  |
| CDS  | CSUB_C1698 | - | 1621062 | 1621817 | ABC transporter ATP-binding protein                                 | P | 251 | arCOG00201 | COG1121 |  |  |
| CDS  | CSUB_C1699 | - | 1621814 | 1622737 | manganese/iron ABC transporter substrate-binding protein            | P | 307 | arCOG01005 | COG0803 |  |  |
| CDS  | CSUB_C1700 | + | 1622837 | 1623985 | DNA primase                                                         | L | 382 | arCOG04281 | COG3358 |  |  |
| CDS  | CSUB_C1701 | - | 1623968 | 1625047 | conserved hypothetical protein                                      | R | 359 | arCOG01741 | COG1537 |  |  |
| CDS  | CSUB_C1702 | + | 1625132 | 1625830 | maleate isomerase                                                   | Q | 232 | arCOG02004 | COG3473 |  |  |
| CDS  | CSUB_C1703 | + | 1625837 | 1627888 | N-methylhydantoinase A                                              | E | 683 | arCOG01511 | COG0145 |  |  |
| CDS  | CSUB_C1704 | + | 1627885 | 1629453 | N-methylhydantoinase B                                              | E | 522 | arCOG01512 | COG0146 |  |  |
| CDS  | CSUB_C1705 | + | 1629474 | 1630082 | small subunit ribosomal protein S7                                  | J | 202 | arCOG04254 | COG0049 |  |  |
| CDS  | CSUB_C1706 | - | 1630079 | 1631647 | phosphoenolpyruvate carboxylase                                     | G | 522 | arCOG04435 | COG1892 |  |  |
| CDS  | CSUB_C1707 | - | 1631650 | 1632624 | simple sugar ABC transporter permease                               | R | 324 | arCOG00261 | COG1079 |  |  |
| CDS  | CSUB_C1708 | - | 1632621 | 1633685 | simple sugar transporter permease                                   | R | 354 | arCOG00260 | COG4603 |  |  |
| CDS  | CSUB_C1709 | - | 1633686 | 1635218 | simple sugar transporter ATP-binding protein                        | R | 510 | arCOG00186 | COG3845 |  |  |
| CDS  | CSUB_C1710 | - | 1635263 | 1636612 | simple sugar ABC transporter substrate-binding protein              | R | 449 | arCOG00257 | COG1744 |  |  |
| CDS  | CSUB_C1711 | - | 1636643 | 1638433 | adenine deaminase                                                   | F | 596 | arCOG00693 | COG1001 |  |  |
| CDS  | CSUB_C1712 | + | 1638503 | 1639510 | F420-dependent N5,N10-methylenetetrahydrodromethanopterin reductase | C | 335 | arCOG02410 | COG2141 |  |  |
| CDS  | CSUB_C1713 | + | 1639514 | 1640746 | conserved hypothetical protein                                      | F | 410 | arCOG00695 | COG0402 |  |  |
| CDS  | CSUB_C1714 | + | 1640879 | 1641712 | carbon monoxide dehydrogenase medium subunit                        | C | 277 | arCOG01926 | COG1319 |  |  |
| CDS  | CSUB_C1715 | + | 1641719 | 1642174 | carbon-monoxide dehydrogenase small subunit                         | C | 151 | arCOG01925 | COG2080 |  |  |
| CDS  | CSUB_C1716 | + | 1642171 | 1644495 | carbon-monoxide dehydrogenase large subunit                         | C | 774 | arCOG01167 | COG1529 |  |  |
| CDS  | CSUB_C1717 | + | 1644750 | 1645046 | conserved hypothetical protein                                      | E | 98  | arCOG01199 | COG1708 |  |  |
| CDS  | CSUB_C1718 | + | 1645209 | 1646228 | ornithine carbamoyltransferase                                      | R | 339 | arCOG00912 | COG0078 |  |  |
| CDS  | CSUB_C1719 | - | 1646225 | 1647181 | carbamate kinase                                                    | E | 318 | arCOG00863 | COG0549 |  |  |
| CDS  | CSUB_C1720 | - | 1647199 | 1648443 | threonine synthase                                                  | E | 414 | arCOG01434 | COG0498 |  |  |
| CDS  | CSUB_C1721 | - | 1648448 | 1648879 | conserved hypothetical protein                                      | R | 143 | arCOG01688 | COG1719 |  |  |
| CDS  | CSUB_C1722 | - | 1648953 | 1649981 | cysteine synthase A                                                 | E | 342 | arCOG01430 | COG0031 |  |  |
| CDS  | CSUB_C1723 | - | 1649978 | 1650871 | ornithine carbamoyltransferase                                      | E | 297 | arCOG00912 | COG0078 |  |  |
| CDS  | CSUB_C1724 | - | 1651080 | 1652333 | conserved hypothetical protein                                      | H | 417 | arCOG00480 | COG1575 |  |  |
| CDS  | CSUB_C1725 | - | 1652402 | 1652845 | hypothetical protein                                                | S | 147 |            |         |  |  |
| CDS  | CSUB_C1726 | - | 1652927 | 1654033 | major facilitator superfamily MFS                                   | G | 368 | arCOG00130 | COG0477 |  |  |
| CDS  | CSUB_C1727 | - | 1654071 | 1655471 | V-type H <sup>+</sup> -transporting ATPase subunit B                | C | 466 | arCOG00865 | COG1156 |  |  |
| CDS  | CSUB_C1728 | - | 1655468 | 1657258 | V-type H <sup>+</sup> -transporting ATPase subunit A                | C | 596 | arCOG00868 | COG1155 |  |  |
| CDS  | CSUB_C1729 | + | 1657361 | 1658338 | ABC transporter ATP-binding protein                                 | V | 325 | arCOG00194 | COG1131 |  |  |
| CDS  | CSUB_C1730 | + | 1658316 | 1659134 | ABC-2 type transport system protein                                 | V | 272 | arCOG01465 | COG0842 |  |  |
| CDS  | CSUB_C1731 | + | 1659125 | 1659964 | conserved hypothetical protein                                      | S | 279 |            |         |  |  |
| CDS  | CSUB_C1732 | + | 1659997 | 1661016 | L-iditol 2-dehydrogenase                                            | E | 339 | arCOG01459 | COG1063 |  |  |
| CDS  | CSUB_C1733 | - | 1661013 | 1662113 | dehydrogenase                                                       | E | 366 | arCOG01459 | COG1063 |  |  |
| rRNA | CSUB_R02   | - | 1662154 | 1663645 | 16S ribosomal RNA                                                   |   |     |            |         |  |  |
| CDS  | CSUB_C1734 | + | 1663852 | 1664370 | conserved hypothetical protein                                      | S | 172 | arCOG04332 | COG2606 |  |  |
| CDS  | CSUB_C1735 | + | 1664741 | 1665472 | conserved hypothetical protein                                      | R | 243 | arCOG02050 | COG0730 |  |  |
| CDS  | CSUB_C1736 | - | 1665571 | 1666071 | hypothetical protein                                                | S | 166 |            |         |  |  |
| tRNA | CSUB_T45   | + | 1666774 | 1666874 | tRNA-Trp                                                            |   |     |            |         |  |  |
| CDS  | CSUB_C1737 | + | 1666940 | 1667638 | transcriptional regulator                                           | K | 232 | arCOG04060 | COG1709 |  |  |
| CDS  | CSUB_C1738 | - | 1667628 | 1668065 | hypothetical protein                                                | S | 145 |            |         |  |  |
| CDS  | CSUB_C1739 | - | 1668066 | 1670861 | conserved hypothetical protein                                      | E | 931 | arCOG06128 | COG1615 |  |  |
| CDS  | CSUB_C1740 | + | 1670938 | 1672623 | acetolactate synthase I/II/III large subunit                        | S | 561 | arCOG03657 | COG0028 |  |  |
| CDS  | CSUB_C1741 | - | 1672607 | 1674145 | conserved hypothetical protein                                      | S | 512 |            |         |  |  |
| CDS  | CSUB_C1742 | + | 1674219 | 1675541 | hypothetical protein                                                | S | 440 |            |         |  |  |
| CDS  | CSUB_C1743 | + | 1675548 | 1676702 | hypothetical protein                                                | S | 384 |            |         |  |  |
| CDS  | CSUB_C1744 | - | 1676699 | 1677127 | hypothetical protein                                                | S | 142 |            |         |  |  |
| CDS  | CSUB_C1745 | - | 1677146 | 1679539 | carbon monoxide dehydrogenase large subunit                         | C | 797 | arCOG01167 | COG1529 |  |  |
| CDS  | CSUB_C1746 | - | 1679553 | 1680224 | conserved hypothetical protein                                      | S | 223 | arCOG01879 |         |  |  |
| CDS  | CSUB_C1747 | + | 1680279 | 1680572 | MazG nucleotide pyrophosphohydrolase                                | R | 97  | arCOG01084 | COG1694 |  |  |
| CDS  | CSUB_C1748 | - | 1680569 | 1680802 | sec-independent protein translocase protein TatA                    | U | 77  | arCOG02694 | COG1826 |  |  |
| tRNA | CSUB_T46   | + | 1680857 | 1680930 | tRNA-Val                                                            |   |     |            |         |  |  |
