# Supplementary material for: Insights into the evolution of Archaea and eukaryotic protein modifier systems revealed by the genome of a novel archaeal group
Source: PubMed Central journal article supplement — Nucleic Acids Res. 2010 Dec 15;39(8):3204–23. doi: 10.1093/nar/gkq1228 (PMC3082918; doi:10.1093/nar/gkq1228), 2010-12-15
Supplement: supp_gkq1228_Table_S2.pdf [file supp_gkq1228_Table_S2.pdf]

Table S2. Distribution of arCOGs in each archaeal phylum/domains; hyperthermophilic *Crenarchaeota*, *Euryarchaeota*, *Thaumarchaeota*, *Korarchaeota* and *C. subterraneum*.

|                                      |         |                                                         | Number of genomes in each archaeal order |              |                 |               |                 |                 |                 |                 |                    |                 |                    |                   |                   |                |                |                   |             |   |
|--------------------------------------|---------|---------------------------------------------------------|------------------------------------------|--------------|-----------------|---------------|-----------------|-----------------|-----------------|-----------------|--------------------|-----------------|--------------------|-------------------|-------------------|----------------|----------------|-------------------|-------------|---|
|                                      |         |                                                         | Crenarchaeota<br>(hyperthermophilic)     |              | Thaumarchaeota  | HWCGI         | "Korarchaeota"  |                 | Euryarchaeota   |                 |                    |                 |                    |                   |                   |                | "Nanarchaeota" |                   |             |   |
| arCOG                                | COG     | Annotation                                              | Desulfurococcales                        | Sulfolobales | Thermoproteales | Nitrospirales | C. subterranean | K. cryptophilum | Archaeoglobales | Halobacteriales | Methanobacteriales | Methanococcales | Methanomicrobiales | Methanocellulales | Methanosarcinales | Methanopyrales | Thermococcales | Thermoplasmatales | N. equitans |   |
| COG category                         |         |                                                         |                                          |              |                 |               |                 |                 |                 |                 |                    |                 |                    |                   |                   |                |                |                   |             |   |
| Number of species used in this study |         |                                                         | 2                                        | 3            | 5               | 2             | 1               | 1               | 1               | 4               | 2                  | 3               | 3                  | 1                 | 5                 | 1              | 4              | 3                 | 1           |   |
| arCOG00001                           | COG1695 | K Predicted transcriptional regulator, PadR family      | 2                                        | 2            | 5               | 0             | 1               | 1               | 1               | 0               | 2                  | 0               | 1                  | 1                 | 2                 | 0              | 4              | 3                 | 0           |   |
| arCOG00002                           | COG1695 | K Predicted transcriptional regulator, PadR family      | 3                                        | 3            | 5               | 2             | 1               | 1               | 0               | 2               | 0                  | 2               | 2                  | 1                 | 2                 | 0              | 4              | 3                 | 0           |   |
| arCOG00004                           | COG1695 | K Predicted transcriptional regulator, PadR family      | 0                                        | 0            | 0               | 0             | 0               | 0               | 0               | 3               | 0                  | 0               | 0                  | 0                 | 0                 | 0              | 0              | 0                 | 0           |   |
| arCOG00005                           | COG1695 | K Predicted transcriptional regulator, PadR family      | 0                                        | 0            | 0               | 0             | 0               | 0               | 0               | 4               | 0                  | 0               | 0                  | 0                 | 0                 | 0              | 0              | 0                 | 0           |   |
| arCOG00006                           | COG1695 | K Predicted transcriptional regulator, PadR family      | 0                                        | 0            | 0               | 0             | 0               | 0               | 0               | 4               | 0                  | 0               | 0                  | 0                 | 0                 | 0              | 0              | 0                 | 0           |   |
| arCOG00007                           | COG1695 | K Predicted transcriptional regulator, PadR family      | 0                                        | 0            | 0               | 0             | 0               | 0               | 0               | 0               | 0                  | 0               | 0                  | 0                 | 0                 | 0              | 0              | 3                 | 0           |   |
| arCOG00008                           | COG1695 | K Predicted transcriptional regulator, PadR family      | 0                                        | 0            | 0               | 0             | 0               | 0               | 0               | 3               | 0                  | 0               | 0                  | 0                 | 0                 | 0              | 0              | 0                 | 0           |   |
| arCOG00009                           | COG0531 | E Amino acid transporter                                | 1                                        | 2            | 5               | 1             | 1               | 1               | 1               | 4               | 1                  | 3               | 3                  | 0                 | 4                 | 1              | 1              | 1                 | 1           |   |
| arCOG00011                           | COG0531 | E Amino acid transporter                                | 0                                        | 1            | 1               | 0             | 0               | 0               | 0               | 0               | 0                  | 0               | 0                  | 0                 | 0                 | 0              | 0              | 0                 | 3           |   |
| arCOG00012                           | COG0531 | E Amino acid transporter                                | 0                                        | 0            | 0               | 0             | 0               | 0               | 0               | 0               | 0                  | 0               | 0                  | 0                 | 0                 | 0              | 0              | 0                 | 3           |   |
| arCOG00013                           | COG0531 | E Amino acid transporter                                | 0                                        | 0            | 0               | 0             | 0               | 0               | 0               | 0               | 0                  | 0               | 0                  | 0                 | 0                 | 0              | 0              | 0                 | 2           |   |
| arCOG00014                           | COG0524 | G Sugar kinase, ribokinase family                       | 3                                        | 3            | 5               | 2             | 1               | 1               | 1               | 4               | 2                  | 3               | 3                  | 1                 | 4                 | 1              | 4              | 3                 | 0           |   |
| arCOG00015                           | COG1105 | G Fructose-1-phosphate kinase or kinase (PFkB)          | 0                                        | 0            | 0               | 0             | 0               | 0               | 0               | 1               | 0                  | 0               | 0                  | 0                 | 1                 | 0              | 0              | 0                 | 0           |   |
| arCOG00016                           | COG0524 | G Sugar kinase, ribokinase family                       | 3                                        | 3            | 5               | 2             | 1               | 1               | 0               | 0               | 2                  | 0               | 0                  | 0                 | 1                 | 0              | 4              | 0                 | 0           |   |
| arCOG00017                           | COG2522 | R Predicted transcriptional regulator                   | 3                                        | 3            | 4               | 2             | 1               | 1               | 1               | 1               | 0                  | 1               | 0                  | 3                 | 1                 | 5              | 0              | 2                 | 0           |   |
| arCOG00018                           | COG0663 | G Predicted sugar kinase                                | 3                                        | 3            | 5               | 2             | 1               | 1               | 1               | 4               | 2                  | 3               | 3                  | 1                 | 5                 | 1              | 4              | 3                 | 0           |   |
| arCOG00019                           | COG2145 | H Hydroxyethylthiazole kinase, sugar kinase family      | 0                                        | 0            | 1               | 0             | 0               | 0               | 0               | 2               | 1                  | 2               | 3                  | 1                 | 3                 | 0              | 3              | 0                 | 0           |   |
| arCOG00020                           | COG0351 | H Hydroxymethylpyrimidine/phosphomethylpyrimidin        | 3                                        | 3            | 4               | 2             | 1               | 1               | 1               | 4               | 2                  | 3               | 3                  | 1                 | 5                 | 1              | 4              | 3                 | 0           |   |
| arCOG00021                           | COG1992 | S Uncharacterized conserved protein                     | 2                                        | 3            | 5               | 0             | 1               | 1               | 0               | 4               | 1                  | 0               | 3                  | 0                 | 1                 | 0              | 4              | 0                 | 0           |   |
| arCOG00022                           |         | S Uncharacterized conserved protein                     | 2                                        | 0            | 1               | 0             | 0               | 0               | 0               | 0               | 0                  | 0               | 0                  | 0                 | 0                 | 0              | 1              | 0                 | 0           |   |
| arCOG00023                           |         | S Uncharacterized conserved protein                     | 0                                        | 2            | 0               | 0             | 0               | 0               | 0               | 0               | 0                  | 0               | 0                  | 0                 | 0                 | 0              | 0              | 0                 | 0           |   |
| arCOG00024                           | COG0554 | C Glycerol kinase                                       | 2                                        | 2            | 2               | 0             | 1               | 1               | 1               | 3               | 0                  | 0               | 0                  | 0                 | 0                 | 0              | 3              | 3                 | 1           |   |
| arCOG00025                           | COG1070 | G Sugar (pentulose and hexulose) kinase                 | 1                                        | 1            | 1               | 0             | 1               | 0               | 1               | 0               | 0                  | 0               | 0                  | 0                 | 1                 | 0              | 0              | 0                 | 0           |   |
| arCOG00026                           | COG1070 | G Sugar (pentulose and hexulose) kinase                 | 0                                        | 0            | 1               | 0             | 0               | 0               | 0               | 1               | 0                  | 0               | 0                  | 0                 | 0                 | 0              | 0              | 0                 | 0           |   |
| arCOG00027                           | COG0076 | E Glutamate decarboxylase, L-tyrosine decarboxylase     | 3                                        | 1            | 0               | 0             | 0               | 0               | 1               | 3               | 2                  | 3               | 3                  | 1                 | 5                 | 1              | 4              | 1                 | 0           |   |
| arCOG00028                           | COG0856 | F Orotate phosphoribosyltransferase homolog             | 0                                        | 0            | 0               | 0             | 0               | 0               | 1               | 3               | 2                  | 3               | 3                  | 1                 | 5                 | 0              | 0              | 0                 | 3           |   |
| arCOG00029                           | COG0461 | F Orotate phosphoribosyltransferase                     | 3                                        | 3            | 5               | 2             | 1               | 1               | 1               | 4               | 2                  | 3               | 3                  | 1                 | 5                 | 1              | 4              | 3                 | 0           |   |
| arCOG00030                           | COG0501 | F Adenine/guanine phosphoribosyltransferase or relat    | 0                                        | 0            | 0               | 0             | 0               | 0               | 0               | 0               | 0                  | 0               | 0                  | 0                 | 0                 | 0              | 0              | 0                 | 0           |   |
| arCOG00031                           | COG0503 | F Adenine/guanine phosphoribosyltransferase or relat    | 3                                        | 3            | 5               | 0             | 1               | 0               | 0               | 3               | 0                  | 0               | 0                  | 0                 | 0                 | 0              | 4              | 0                 | 0           |   |
| arCOG00032                           | COG1092 | R SAM-dependent methyltransferase                       | 2                                        | 0            | 0               | 0             | 0               | 1               | 0               | 0               | 0                  | 3               | 0                  | 0                 | 0                 | 0              | 1              | 4                 | 0           |   |
| arCOG00033                           | COG2520 | J Wybutosine (yW) biosynthesis enzyme, methyltrans      | 3                                        | 3            | 5               | 2             | 1               | 1               | 1               | 4               | 2                  | 3               | 3                  | 1                 | 5                 | 1              | 4              | 3                 | 1           |   |
| arCOG00034                           | COG0311 | H Predicted glutamine amidotransferase involved in py   | 3                                        | 3            | 4               | 2             | 0               | 1               | 1               | 4               | 2                  | 3               | 3                  | 1                 | 5                 | 1              | 4              | 3                 | 0           |   |
| arCOG00035                           | COG2102 | R Predicted ATPase of PP-loop superfamily               | 3                                        | 3            | 5               | 2             | 1               | 0               | 1               | 4               | 2                  | 3               | 3                  | 1                 | 5                 | 1              | 4              | 3                 | 1           |   |
| arCOG00036                           | COG2102 | R Predicted ATPase of PP-loop superfamily               | 1                                        | 0            | 3               | 0             | 1               | 1               | 0               | 2               | 0                  | 0               | 1                  | 1                 | 2                 | 0              | 0              | 0                 | 0           |   |
| arCOG00037                           | COG2117 | J Predicted subunit of rRNA(5-methylaminomethyl)-2      | 0                                        | 0            | 0               | 0             | 0               | 0               | 0               | 4               | 2                  | 3               | 3                  | 1                 | 5                 | 1              | 4              | 0                 | 0           |   |
| arCOG00038                           | COG0301 | H Thiamine biosynthesis ATP pyrophosphatase             | 3                                        | 3            | 5               | 2             | 1               | 1               | 1               | 3               | 2                  | 3               | 3                  | 1                 | 5                 | 1              | 4              | 3                 | 1           |   |
| arCOG00039                           | COG0603 | R Predicted PP-loop superfamily ATPase                  | 2                                        | 3            | 4               | 2             | 1               | 0               | 1               | 2               | 2                  | 3               | 3                  | 1                 | 5                 | 1              | 4              | 3                 | 0           |   |
| arCOG00040                           | COG2236 | R Predicted phosphoribosyltransferase                   | 3                                        | 3            | 5               | 1             | 1               | 1               | 1               | 4               | 0                  | 0               | 0                  | 1                 | 4                 | 0              | 4              | 3                 | 0           |   |
| arCOG00041                           | COG1926 | R Predicted phosphoribosyltransferase                   | 1                                        | 0            | 1               | 0             | 1               | 0               | 0               | 2               | 0                  | 0               | 1                  | 1                 | 3                 | 0              | 0              | 0                 | 2           |   |
| arCOG00042                           | COG0307 | D rRNA(IIe)-lysine synthase MsdJ                        | 3                                        | 3            | 5               | 2             | 1               | 1               | 1               | 4               | 2                  | 3               | 3                  | 1                 | 5                 | 1              | 4              | 3                 | 0           |   |
| arCOG00043                           | COG1606 | R ATP-utilizing enzyme of the PP-loop superfamily       | 0                                        | 0            | 0               | 0             | 0               | 0               | 1               | 2               | 2                  | 3               | 3                  | 1                 | 5                 | 0              | 0              | 0                 | 0           |   |
| arCOG00044                           | COG0037 | D rRNA(IIe)-lysine synthase MsdJ                        | 0                                        | 0            | 0               | 0             | 0               | 0               | 0               | 0               | 0                  | 3               | 0                  | 0                 | 0                 | 0              | 1              | 4                 | 0           |   |
| arCOG00045                           | COG1365 | R Predicted ATPase (PP-loop superfamily)                | 0                                        | 0            | 0               | 0             | 0               | 0               | 0               | 2               | 3                  | 0               | 0                  | 0                 | 0                 | 0              | 1              | 4                 | 0           |   |
| arCOG00046                           | COG0037 | D rRNA(IIe)-lysine synthase MsdJ                        | 0                                        | 0            | 0               | 0             | 0               | 0               | 0               | 0               | 0                  | 3               | 0                  | 0                 | 1                 | 3              | 1              | 4                 | 0           |   |
| arCOG00047                           | COG1041 | L Predicted DNA modification methylase                  | 3                                        | 3            | 5               | 1             | 1               | 1               | 1               | 4               | 2                  | 3               | 3                  | 1                 | 5                 | 1              | 4              | 3                 | 1           |   |
| arCOG00048                           | COG0116 | L Predicted N6-adenine-specific DNA methylase           | 3                                        | 3            | 4               | 0             | 1               | 1               | 1               | 1               | 0                  | 1               | 0                  | 1                 | 0                 | 1              | 0              | 0                 | 1           |   |
| arCOG00049                           | COG0421 | E Spermidine synthase                                   | 3                                        | 3            | 5               | 0             | 1               | 0               | 0               | 1               | 0                  | 0               | 3                  | 1                 | 0                 | 0              | 0              | 4                 | 3           | 0 |
| arCOG00051                           | COG4262 | R Predicted spermidine synthase with an N-terminal m    | 0                                        | 0            | 0               | 0             | 0               | 0               | 0               | 2               | 0                  | 0               | 0                  | 0                 | 0                 | 0              | 0              | 0                 | 0           |   |
| arCOG00052                           | COG0166 | G Glucose-6-phosphate isomerase                         | 3                                        | 3            | 5               | 2             | 1               | 0               | 0               | 4               | 0                  | 3               | 0                  | 0                 | 0                 | 0              | 0              | 0                 | 3           |   |
| arCOG00053                           | COG0269 | G 3-hexulose-6-phosphate synthase or related protein    | 3                                        | 3            | 5               | 0             | 0               | 1               | 1               | 0               | 0                  | 2               | 3                  | 1                 | 4                 | 1              | 4              | 0                 | 0           |   |
| arCOG00054                           | COG2521 | R Predicted archaeal methyltransferase                  | 3                                        | 0            | 5               | 0             | 1               | 0               | 0               | 0               | 0                  | 1               | 0                  | 0                 | 0                 | 0              | 1              | 4                 | 0           |   |
| arCOG00055                           | COG0421 | E Spermidine synthase                                   | 1                                        | 0            | 0               | 0             | 0               | 0               | 0               | 0               | 0                  | 0               | 0                  | 0                 | 0                 | 0              | 0              | 0                 | 0           |   |
| arCOG00056                           | COG1818 | R Predicted RNA-binding protein, contains THUMP d       | 3                                        | 3            | 4               | 0             | 0               | 0               | 0               | 0               | 0                  | 1               | 0                  | 0                 | 0                 | 0              | 0              | 0                 | 0           |   |
| arCOG00057                           | COG0449 | M Glucosamine 6-phosphate synthetase                    | 3                                        | 3            | 5               | 2             | 1               | 1               | 0               | 4               | 2                  | 3               | 3                  | 1                 | 5                 | 1              | 4              | 3                 | 0           |   |
| arCOG00058                           | COG2222 | M Predicted phosphoglycerate isomerase                  | 0                                        | 0            | 0               | 0             | 0               | 0               | 0               | 0               | 2                  | 0               | 0                  | 0                 | 0                 | 0              | 1              | 4                 | 0           |   |
| arCOG00059                           | COG2222 | M Predicted phosphoglycerate isomerase                  | 1                                        | 3            | 0               | 2             | 0               | 0               | 0               | 0               | 0                  | 0               | 0                  | 0                 | 0                 | 0              | 0              | 0                 | 0           |   |
| arCOG00060                           | COG0626 | E Cystathionine beta-lyase/cystathionine gamma-synt     | 2                                        | 3            | 4               | 0             | 0               | 1               | 0               | 3               | 0                  | 0               | 0                  | 0                 | 3                 | 0              | 4              | 3                 | 0           |   |
| arCOG00061                           | COG2873 | E O-acetylhomoserine sulphydrylase                      | 0                                        | 0            | 0               | 0             | 0               | 0               | 0               | 1               | 1                  | 0               | 2                  | 1                 | 3                 | 0              | 0              | 0                 | 0           |   |
| arCOG00062                           | COG0388 | R Predicted amidohydrolase                              | 3                                        | 3            | 5               | 2             | 1               | 1               | 1               | 3               | 2                  | 0               | 3                  | 1                 | 5                 | 0              | 4              | 3                 | 0           |   |
| arCOG00063                           | COG0504 | F CTP synthase (UTP-ammonia lyase)                      | 3                                        | 3            | 5               | 2             | 1               | 1               | 1               | 4               | 2                  | 3               | 3                  | 1                 | 5                 | 1              | 4              | 3                 | 0           |   |
| arCOG00064                           | COG0505 | E Carbamoylphosphate synthase small subunit             | 1                                        | 3            | 4               | 2             | 0               | 0               | 1               | 4               | 2                  | 3               | 3                  | 1                 | 5                 | 1              | 1              | 3                 | 0           |   |
| arCOG00065                           | COG0520 | O Selenocysteine lyase/Cysteine desulfurase             | 2                                        | 3            | 2               | 2             | 1               | 1               | 0               | 4               | 1                  | 0               | 0                  | 3                 | 1                 | 4              | 1              | 4                 | 1           |   |
| arCOG00066                           | COG1104 | E Cysteine sulfinate desulfinase/cysteine desulfurase o | 0                                        | 0            | 0               | 2             | 0               | 1               | 1               | 0               | 1                  | 0               | 3                  | 1                 | 5                 | 0              | 0              | 0                 | 0           |   |
| arCOG00067                           | COG0462 | F Phosphoribosylpyrophosphate synthetase                | 3                                        | 3            | 5               | 2             | 1               | 1               | 1               | 4               | 2                  | 3               | 3                  | 1                 | 5                 | 1              | 4              | 3                 | 0           |   |
| arCOG00068                           | COG0794 | M Predicted sugar phosphate isomerase involved in caq   | 3                                        | 3            | 5               | 0             | 0               | 0               | 0               | 0               | 2                  | 1               | 3                  | 1                 | 5                 | 0              | 0              | 0                 | 0           |   |
| arCOG00069                           | COG0171 | H NH3-dependent NAD+ synthetase                         | 3                                        | 3            | 5               | 2             | 1               | 1               | 1               | 4               | 2                  | 3               | 3                  | 1                 | 5                 | 1              | 4              | 3                 | 0           |   |
| arCOG00070                           | COG0112 | E Glycine/serine hydroxymethyltransferase               | 3                                        | 3            | 4               | 2             | 1               | 1               | 1               | 4               | 2                  | 1               | 3                  | 1                 | 5                 | 1              | 4              | 3                 | 0           |   |
| arCOG00071                           | COG0367 | E Asparagine synthase (glutamine-hydrolyzing)           | 1                                        | 0            | 3               | 2             | 1               | 0               | 1               | 4               | 2                  | 3               | 3                  | 1                 | 4                 | 1              | 4              | 3                 | 0           |   |
| arCOG00072                           | COG0175 | E 3'-phosphoadenosine 5'-phosphosulfate sulfoltransfer  | 3                                        | 0            | 0               | 0             | 0               | 0               | 0               | 0               | 0                  | 0               | 0                  | 0                 | 0                 | 0              | 1              | 4                 | 0           |   |
| arCOG00073                           | COG0175 | E PAPS reductase related enzyme fused to RNA-bind       | 2                                        | 1            |                 |               |                 |                 |                 |                 |                    |                 |                    |                   |                   |                |                |                   |             |   |



|            |         |   |                                                       |   |   |   |   |   |   |   |   |   |   |   |   |   |   |   |   |
|------------|---------|---|-------------------------------------------------------|---|---|---|---|---|---|---|---|---|---|---|---|---|---|---|---|
| arCOG00249 | COG1250 | I | 3-hydroxyacyl-CoA dehydrogenase                       | 1 | 3 | 4 | 2 | 1 | 1 | 1 | 3 | 0 | 0 | 0 | 0 | 0 | 0 | 3 | 0 |
| arCOG00250 | COG1250 | I | 3-hydroxyacyl-CoA dehydrogenase                       | 0 | 1 | 0 | 0 | 0 | 0 | 1 | 4 | 1 | 0 | 0 | 0 | 0 | 0 | 3 | 0 |
| arCOG00251 | COG1250 | I | 3-hydroxyacyl-CoA dehydrogenase                       | 0 | 3 | 0 | 0 | 0 | 0 | 1 | 0 | 0 | 0 | 0 | 0 | 0 | 0 | 0 | 0 |
| arCOG00252 | COG0677 | M | UDP-N-acetyl-D-mannosaminuronate dehydrogenas         | 1 | 0 | 5 | 2 | 0 | 1 | 0 | 1 | 2 | 3 | 2 | 1 | 4 | 0 | 0 | 0 |
| arCOG00253 | COG1004 | M | Predicted UDP-glucose 6-dehydrogenase                 | 0 | 1 | 2 | 0 | 1 | 0 | 1 | 4 | 1 | 2 | 3 | 1 | 5 | 0 | 2 | 0 |
| arCOG00254 | COG1712 | R | Predicted dinucleotide-utilizing enzyme               | 1 | 0 | 1 | 2 | 0 | 0 | 1 | 0 | 2 | 3 | 3 | 1 | 5 | 1 | 0 | 0 |
| arCOG00255 | COG0077 | E | Prephenate dehydratase                                | 0 | 3 | 4 | 2 | 1 | 1 | 0 | 4 | 2 | 3 | 3 | 1 | 5 | 1 | 1 | 3 |
| arCOG00256 | COG0287 | E | Prephenate dehydrogenase                              | 0 | 0 | 0 | 0 | 0 | 0 | 0 | 0 | 0 | 0 | 0 | 0 | 0 | 0 | 3 | 0 |
| arCOG00257 | COG1744 | R | Uncharacterized ABC-type transport system, peripla    | 3 | 0 | 3 | 0 | 1 | 1 | 1 | 1 | 0 | 0 | 0 | 0 | 0 | 0 | 0 | 1 |
| arCOG00258 | COG1744 | R | Uncharacterized ABC-type transport system, peripla    | 3 | 0 | 3 | 0 | 1 | 1 | 1 | 0 | 3 | 0 | 0 | 0 | 0 | 0 | 4 | 0 |
| arCOG00259 | COG4603 | R | ABC-type uncharacterized transport system, peripla    | 3 | 0 | 3 | 0 | 0 | 0 | 0 | 0 | 0 | 0 | 0 | 0 | 0 | 0 | 0 | 0 |
| arCOG00260 | COG4603 | R | ABC-type uncharacterized transport system, peripla    | 3 | 0 | 3 | 0 | 1 | 1 | 1 | 3 | 0 | 0 | 0 | 0 | 0 | 0 | 4 | 0 |
| arCOG00261 | COG1079 | R | Uncharacterized ABC-type transport system, peripla    | 3 | 0 | 3 | 0 | 1 | 1 | 1 | 3 | 0 | 0 | 0 | 0 | 0 | 0 | 4 | 0 |
| arCOG00262 | COG1079 | R | Uncharacterized ABC-type transport system, peripla    | 2 | 0 | 3 | 0 | 0 | 0 | 0 | 0 | 0 | 0 | 0 | 0 | 0 | 0 | 0 | 0 |
| arCOG00263 | COG1172 | G | Ribose/xylulose/arabinose/galactoside ABC-type trans  | 0 | 1 | 1 | 0 | 0 | 0 | 0 | 0 | 0 | 0 | 0 | 0 | 0 | 0 | 0 | 0 |
| arCOG00264 | COG2041 | R | Sulfite oxidase or related enzyme                     | 3 | 3 | 4 | 0 | 1 | 0 | 1 | 3 | 0 | 0 | 0 | 0 | 0 | 0 | 3 | 0 |
| arCOG00266 | COG2041 | R | Sulfite oxidase or related enzyme                     | 0 | 2 | 1 | 0 | 0 | 0 | 0 | 2 | 0 | 0 | 1 | 1 | 2 | 0 | 0 | 0 |
| arCOG00267 | COG0755 | O | ABC-type transport system involved in cytochrome      | 2 | 0 | 2 | 0 | 0 | 0 | 1 | 2 | 0 | 0 | 0 | 1 | 3 | 0 | 0 | 0 |
| arCOG00268 | COG1138 | O | Cytochrome c biogenesis factor                        | 2 | 0 | 2 | 0 | 0 | 0 | 0 | 0 | 0 | 0 | 0 | 0 | 0 | 0 | 0 | 0 |
| arCOG00269 | COG1138 | O | Cytochrome c biogenesis factor, CcmF homolog          | 0 | 0 | 2 | 0 | 0 | 0 | 0 | 0 | 0 | 0 | 0 | 0 | 0 | 0 | 0 | 0 |
| arCOG00270 | COG1138 | O | Cytochrome c biogenesis factor                        | 0 | 0 | 0 | 0 | 0 | 0 | 1 | 2 | 0 | 0 | 0 | 0 | 3 | 0 | 0 | 0 |
| arCOG00271 | COG0697 | G | permease of the drug/metabolite transporter (DMT)     | 3 | 3 | 4 | 1 | 1 | 1 | 4 | 1 | 2 | 2 | 1 | 3 | 0 | 4 | 3 | 0 |
| arCOG00272 | COG0697 | G | permease of the drug/metabolite transporter (DMT)     | 3 | 0 | 5 | 0 | 0 | 1 | 1 | 1 | 0 | 0 | 0 | 1 | 0 | 4 | 0 | 0 |
| arCOG00273 | COG0697 | G | permease of the drug/metabolite transporter (DMT)     | 0 | 0 | 0 | 0 | 0 | 0 | 0 | 0 | 0 | 0 | 3 | 1 | 0 | 0 | 0 |   |
| arCOG00274 | COG0697 | G | permease of the drug/metabolite transporter (DMT)     | 0 | 0 | 0 | 0 | 0 | 0 | 0 | 0 | 0 | 0 | 0 | 2 | 0 | 0 | 0 |   |
| arCOG00275 | COG0697 | G | permease of the drug/metabolite transporter (DMT)     | 0 | 0 | 0 | 0 | 0 | 0 | 0 | 0 | 0 | 0 | 0 | 4 | 0 | 0 | 0 |   |
| arCOG00276 | COG0697 | G | permease of the drug/metabolite transporter (DMT)     | 0 | 0 | 0 | 0 | 0 | 0 | 0 | 0 | 0 | 0 | 0 | 3 | 0 | 0 | 0 |   |
| arCOG00277 | COG0697 | G | permease of the drug/metabolite transporter (DMT)     | 0 | 0 | 3 | 0 | 0 | 0 | 0 | 0 | 0 | 0 | 0 | 0 | 0 | 0 | 0 | 0 |
| arCOG00278 | COG0697 | G | permease of the drug/metabolite transporter (DMT)     | 0 | 0 | 0 | 0 | 0 | 0 | 0 | 0 | 0 | 0 | 0 | 0 | 0 | 4 | 0 | 0 |
| arCOG00279 | COG1586 | E | S-adenosylmethionine decarboxylase                    | 3 | 3 | 5 | 0 | 1 | 1 | 1 | 0 | 0 | 3 | 3 | 0 | 0 | 0 | 4 | 3 |
| arCOG00280 | COG0433 | L | HerA helicase                                         | 3 | 3 | 5 | 2 | 1 | 1 | 1 | 4 | 2 | 3 | 2 | 1 | 5 | 1 | 4 | 3 |
| arCOG00281 |         | R | Predicted ATPase                                      | 0 | 0 | 3 | 0 | 0 | 0 | 0 | 0 | 0 | 0 | 0 | 0 | 0 | 1 | 0 | 0 |
| arCOG00282 | COG0433 | L | HerA helicase                                         | 2 | 0 | 4 | 0 | 1 | 1 | 1 | 0 | 0 | 0 | 0 | 0 | 0 | 0 | 0 | 0 |
| arCOG00283 | COG0433 | L | HerA helicase                                         | 0 | 3 | 0 | 0 | 0 | 0 | 0 | 0 | 0 | 0 | 0 | 0 | 0 | 0 | 0 | 0 |
| arCOG00284 | COG0433 | L | HerA helicase                                         | 3 | 3 | 3 | 0 | 0 | 0 | 0 | 2 | 0 | 0 | 0 | 1 | 3 | 0 | 0 | 1 |
| arCOG00285 | COG0433 | L | HerA helicase                                         | 2 | 3 | 4 | 0 | 0 | 0 | 0 | 0 | 0 | 0 | 0 | 0 | 0 | 0 | 0 | 0 |
| arCOG00286 | COG0433 | L | HerA helicase                                         | 2 | 3 | 0 | 0 | 0 | 1 | 0 | 0 | 0 | 0 | 0 | 0 | 0 | 0 | 0 | 0 |
| arCOG00287 |         | S | Predicted NurA-like nuclease                          | 3 | 3 | 3 | 0 | 0 | 1 | 0 | 0 | 0 | 0 | 0 | 0 | 0 | 0 | 0 | 0 |
| arCOG00288 | COG0778 | C | Nitroreductase                                        | 3 | 3 | 4 | 2 | 1 | 1 | 1 | 4 | 2 | 3 | 3 | 1 | 5 | 1 | 3 | 1 |
| arCOG00289 | COG0778 | C | Nitroreductase                                        | 0 | 0 | 0 | 0 | 0 | 0 | 1 | 0 | 1 | 0 | 0 | 2 | 0 | 0 | 0 | 0 |
| arCOG00291 | COG1145 | C | Ferredoxin                                            | 1 | 0 | 4 | 2 | 0 | 0 | 1 | 0 | 1 | 0 | 0 | 0 | 0 | 0 | 0 | 0 |
| arCOG00292 | COG1145 | C | Ferredoxin domain containing protein                  | 0 | 0 | 0 | 0 | 0 | 0 | 1 | 0 | 2 | 3 | 3 | 1 | 5 | 1 | 0 | 0 |
| arCOG00295 | COG2000 | R | Predicted Fe-S protein                                | 0 | 0 | 0 | 0 | 0 | 0 | 0 | 1 | 3 | 3 | 1 | 2 | 1 | 0 | 0 | 0 |
| arCOG00296 | COG1145 | C | Ferredoxin                                            | 0 | 0 | 0 | 0 | 0 | 0 | 0 | 0 | 1 | 2 | 1 | 4 | 0 | 0 | 0 | 0 |
| arCOG00297 | COG4871 | S | Uncharacterized protein conserved in archaea          | 0 | 0 | 0 | 0 | 0 | 0 | 1 | 0 | 1 | 0 | 0 | 1 | 5 | 0 | 0 | 0 |
| arCOG00298 |         | O | McA-like oxidoreductase, duplicated domains (non      | 0 | 0 | 0 | 0 | 0 | 0 | 0 | 0 | 0 | 0 | 0 | 0 | 0 | 0 | 0 | 0 |
| arCOG00299 |         | O | DhaA family protein                                   | 2 | 0 | 1 | 0 | 0 | 1 | 0 | 0 | 0 | 0 | 0 | 0 | 0 | 0 | 0 | 0 |
| arCOG00300 | COG1145 | C | Ferredoxin                                            | 0 | 0 | 0 | 0 | 0 | 0 | 0 | 0 | 0 | 0 | 0 | 2 | 0 | 0 | 0 | 0 |
| arCOG00301 | COG0778 | C | Nitroreductase                                        | 0 | 0 | 0 | 0 | 0 | 0 | 0 | 0 | 0 | 0 | 1 | 0 | 0 | 0 | 0 | 0 |
| arCOG00302 | COG0613 | R | Metal-dependent phosphoesterase (PHP family)          | 3 | 3 | 1 | 2 | 0 | 0 | 1 | 4 | 2 | 3 | 3 | 1 | 5 | 0 | 0 | 0 |
| arCOG00304 | COG1387 | E | Histidinol phosphatase or related hydrolase of the PI | 0 | 0 | 0 | 0 | 0 | 0 | 1 | 0 | 2 | 3 | 3 | 1 | 5 | 1 | 4 | 0 |
| arCOG00305 | COG1796 | L | DNA polymerase IV (family X)                          | 0 | 0 | 0 | 0 | 0 | 0 | 0 | 3 | 1 | 0 | 1 | 1 | 4 | 0 | 0 | 2 |
| arCOG00306 | COG0613 | R | Metal-dependent phosphoesterase (PHP family)          | 3 | 3 | 0 | 0 | 0 | 0 | 0 | 0 | 0 | 0 | 0 | 0 | 0 | 0 | 0 | 0 |
| arCOG00307 | COG1603 | J | RNase P/RNase MRP subunit p30                         | 3 | 3 | 1 | 0 | 1 | 1 | 1 | 4 | 2 | 3 | 3 | 1 | 5 | 1 | 4 | 0 |
| arCOG00308 | COG0613 | R | Metal-dependent phosphoesterase (PHP family)          | 0 | 0 | 0 | 0 | 0 | 0 | 0 | 0 | 0 | 0 | 0 | 3 | 0 | 0 | 0 | 0 |
| arCOG00309 | COG0613 | R | Metal-dependent phosphoesterase (PHP family)          | 0 | 0 | 0 | 0 | 0 | 0 | 0 | 0 | 0 | 0 | 0 | 3 | 0 | 0 | 0 | 0 |
| arCOG00310 | COG1225 | O | Peroxisome                                            | 2 | 3 | 4 | 2 | 1 | 0 | 0 | 4 | 0 | 0 | 3 | 1 | 4 | 0 | 2 | 3 |
| arCOG00312 | COG0450 | O | Peroxisome                                            | 3 | 2 | 2 | 0 | 0 | 1 | 1 | 3 | 0 | 1 | 3 | 2 | 1 | 5 | 4 | 3 |
| arCOG00313 | COG1999 | R | Cu2+-binding oxygen sensor (SCO1/ScuCP/PrnC fam       | 0 | 0 | 0 | 0 | 0 | 0 | 0 | 4 | 0 | 0 | 0 | 0 | 0 | 0 | 0 | 0 |
| arCOG00314 | COG0526 | O | Thiol-disulfide isomerase or thioredoxin              | 0 | 0 | 0 | 2 | 0 | 0 | 0 | 4 | 0 | 0 | 0 | 0 | 0 | 0 | 0 | 0 |
| arCOG00315 | COG1225 | O | Peroxisome                                            | 0 | 0 | 0 | 0 | 0 | 0 | 0 | 4 | 0 | 0 | 0 | 0 | 0 | 0 | 0 | 0 |
| arCOG00316 | COG1225 | O | Peroxisome                                            | 0 | 0 | 0 | 0 | 0 | 0 | 0 | 3 | 0 | 0 | 0 | 0 | 0 | 0 | 0 | 0 |
| arCOG00317 | COG4847 | S | Uncharacterized protein conserved in archaea          | 1 | 2 | 4 | 0 | 0 | 0 | 0 | 0 | 0 | 0 | 0 | 0 | 0 | 0 | 3 | 0 |
| arCOG00318 | COG0778 | P | Phosphate uptake regulator                            | 3 | 3 | 5 | 2 | 1 | 1 | 1 | 4 | 2 | 3 | 3 | 1 | 4 | 1 | 4 | 3 |
| arCOG00319 | COG0704 | P | Phosphate uptake regulator                            | 1 | 0 | 0 | 0 | 0 | 0 | 0 | 0 | 0 | 0 | 0 | 0 | 0 | 0 | 0 | 0 |
| arCOG00320 | COG0704 | P | Phosphate uptake regulator                            | 0 | 2 | 0 | 0 | 0 | 1 | 0 | 0 | 0 | 0 | 0 | 0 | 0 | 0 | 0 | 2 |
| arCOG00321 | COG0312 | R | Predicted Zn-dependent protease or their inactivated  | 3 | 3 | 5 | 1 | 1 | 1 | 1 | 0 | 2 | 3 | 3 | 1 | 5 | 1 | 4 | 3 |
| arCOG00322 | COG0312 | R | Predicted Zn-dependent protease or their inactivated  | 3 | 3 | 5 | 1 | 1 | 1 | 1 | 0 | 2 | 3 | 3 | 1 | 5 | 1 | 4 | 2 |
| arCOG00323 | COG0312 | R | Predicted Zn-dependent protease or their inactivated  | 0 | 3 | 0 | 0 | 0 | 0 | 0 | 0 | 0 | 0 | 0 | 0 | 0 | 0 | 0 | 0 |
| arCOG00324 | COG0123 | R | Deacetylase, including yeast histone deacetylase anc  | 3 | 3 | 5 | 0 | 1 | 1 | 1 | 4 | 1 | 1 | 2 | 1 | 4 | 1 | 4 | 0 |
| arCOG00325 | COG0123 | R | Deacetylase, including yeast histone deacetylase anc  | 0 | 0 | 3 | 0 | 0 | 0 | 0 | 0 | 0 | 0 | 0 | 0 | 0 | 0 | 0 | 0 |
| arCOG00326 | COG0123 | R | Deacetylase, including yeast histone deacetylase anc  | 0 | 2 | 0 | 0 | 0 | 0 | 0 | 0 | 0 | 0 | 0 | 0 | 0 | 0 | 0 | 0 |
| arCOG00327 | COG0123 | R | Deacetylase, including yeast histone deacetylase anc  | 0 | 0 | 0 | 0 | 0 | 0 | 1 | 0 | 0 | 0 | 0 | 1 | 0 | 0 | 0 | 0 |
| arCOG00328 | COG0417 | L | DNA polymerase elongation subunit (family B)          | 3 | 3 | 5 | 2 | 1 | 1 | 1 | 4 | 2 | 3 | 3 | 1 | 5 | 1 | 4 | 3 |
| arCOG00329 | COG0417 | L | DNA polymerase elongation subunit (family B)          | 2 | 2 | 0 | 0 | 1 | 0 | 1 | 2 | 0 | 1 | 1 | 0 | 0 | 0 | 0 | 2 |
| arCOG00331 | COG0417 | L | DNA polymerase elongation subunit (family B), C-t     | 0 | 0 | 0 | 0 | 0 | 0 | 0 | 0 | 2 | 0 | 0 | 0 | 0 | 0 | 0 | 1 |
| arCOG00332 | COG0247 | C | Membrane associated Fe-S oxidoreductase               | 1 | 0 | 0 | 0 | 1 | 1 | 1 | 3 | 0 | 0 | 1 | 0 | 0 | 0 | 0 | 2 |
| arCOG00333 | COG0247 | C | Fe-S oxidoreductase                                   | 2 | 3 | 4 | 0 | 0 | 1 | 1 | 0 | 0 | 1 | 0 | 0 | 0 | 0 | 0 | 3 |
| arCOG00334 | COG0247 | C | Fe-S oxidoreductase                                   | 2 | 3 | 4 | 0 | 0 | 1 | 1 | 0 | 0 | 1 | 0 | 0 | 0 | 0 | 0 | 3 |
| arCOG00335 | COG1139 | C | Uncharacterized conserved protein containing ferred   | 2 | 3 | 4 | 0 | 1 | 1 | 1 | 0 | 1 | 0 | 0 | 0 | 0 | 0 | 3 | 0 |
| arCOG00336 | COG0247 | C | Fe-S oxidoreductase                                   | 0 | 0 | 0 | 0 | 1 | 0 | 0 | 3 | 0 | 0 | 0 | 0 | 0 | 0 | 0 | 0 |
| arCOG00337 | COG0277 | C | FAD:FMN-containing dehydrogenase                      | 2 | 3 | 5 | 2 | 1 | 1 | 1 | 4 | 0 | 0 | 0 | 1 | 5 | 0 | 0 | 3 |
| arCOG00338 | COG2048 | C | Heterodisulfide reductase, subunit B                  | 0 | 3 | 0 | 0 | 0 | 1 | 1 | 3 | 0 | 2 | 3 | 1 | 5 | 1 | 0 | 1 |
| arCOG00339 | COG0247 | C | Fe-S oxidoreductase                                   | 0 | 0 | 0 | 0 | 0 | 0 | 0 | 0 | 0 | 0 | 2 | 0 | 0 | 0 | 0 | 0 |
| arCOG00340 | COG0277 | C | FAD:FMN-containing dehydrogenase fused to Heter       | 0 | 2 | 0 | 0 | 0 | 0 | 1 | 0 | 0 | 0 | 0 | 0 | 3 | 0 | 0 | 0 |
| arCOG00341 | COG0277 | C | FAD:FMN-containing dehydrogenase                      | 0 | 3 | 0 | 0 | 0 | 0 | 0 | 0 | 0 | 0 | 0 | 0 | 0 | 0 | 0 | 0 |
| arCOG00342 | COG2048 | C | H                                                     |   |   |   |   |   |   |   |   |   |   |   |   |   |   |   |   |







|            |         |   |                                                         |   |   |   |   |   |   |   |   |   |   |   |   |   |   |   |   |   |   |
|------------|---------|---|---------------------------------------------------------|---|---|---|---|---|---|---|---|---|---|---|---|---|---|---|---|---|---|
| arCOG00793 | COG1468 | R | RecB family exonuclease                                 | 0 | 0 | 0 | 0 | 0 | 0 | 1 | 0 | 1 | 0 | 3 | 1 | 5 | 0 | 0 | 0 | 0 |   |
| arCOG00794 | COG1468 | V | CRISPR-associated protein Cas4 (RecB family exor        | 0 | 0 | 0 | 0 | 0 | 0 | 1 | 1 | 1 | 0 | 0 | 0 | 3 | 0 | 3 | 1 | 1 |   |
| arCOG00795 | COG1112 | L | UvrD/REP helicase                                       | 0 | 0 | 0 | 0 | 0 | 0 | 0 | 4 | 0 | 0 | 0 | 0 | 0 | 0 | 0 | 0 | 0 |   |
| arCOG00796 | COG1112 | L | UvrD/REP helicase                                       | 0 | 0 | 0 | 0 | 0 | 0 | 0 | 2 | 0 | 0 | 0 | 0 | 0 | 0 | 0 | 0 | 0 |   |
| arCOG00797 | COG0210 | L | Superfamily I DNA and RNA helicase                      | 0 | 0 | 0 | 0 | 0 | 0 | 0 | 4 | 1 | 0 | 0 | 0 | 0 | 0 | 0 | 0 | 0 |   |
| arCOG00798 | COG0210 | L | Superfamily I DNA and RNA helicase                      | 0 | 0 | 0 | 1 | 0 | 0 | 0 | 2 | 2 | 0 | 2 | 1 | 3 | 0 | 0 | 3 | 0 |   |
| arCOG00800 | COG1468 | L | RecB family exonuclease                                 | 0 | 0 | 0 | 0 | 0 | 0 | 0 | 2 | 0 | 0 | 0 | 0 | 0 | 0 | 0 | 0 | 0 |   |
| arCOG00801 | COG0210 | L | RecB family exonuclease                                 | 0 | 0 | 0 | 1 | 0 | 0 | 0 | 0 | 0 | 0 | 1 | 1 | 2 | 0 | 0 | 1 | 0 |   |
| arCOG00802 | COG1074 | L | ATP-dependent exoDNAse (exonuclease V) beta sub         | 0 | 0 | 0 | 0 | 0 | 0 | 0 | 0 | 0 | 0 | 0 | 3 | 0 | 0 | 0 | 0 | 0 |   |
| arCOG00803 | COG1112 | L | Superfamily I DNA/RNA helicase fused Vsr family         | 0 | 0 | 0 | 1 | 0 | 0 | 0 | 0 | 2 | 0 | 2 | 0 | 3 | 0 | 0 | 1 | 0 |   |
| arCOG00805 | COG3857 | L | ATP-dependent nuclease, subunit B                       | 0 | 0 | 0 | 0 | 0 | 0 | 0 | 0 | 0 | 0 | 3 | 0 | 0 | 0 | 0 | 0 | 0 |   |
| arCOG00806 | COG1112 | L | Superfamily I DNA/RNA helicase fused to RecB far        | 0 | 0 | 0 | 0 | 0 | 0 | 0 | 0 | 0 | 0 | 2 | 0 | 0 | 0 | 3 | 0 | 0 |   |
| arCOG00807 | COG0060 | J | Isoleucyl-tRNA synthetase                               | 3 | 3 | 5 | 2 | 1 | 1 | 1 | 4 | 2 | 3 | 3 | 1 | 5 | 1 | 4 | 3 | 1 |   |
| arCOG00808 | COG0525 | J | Valyl-tRNA synthetase                                   | 3 | 3 | 5 | 2 | 1 | 1 | 1 | 4 | 2 | 3 | 3 | 1 | 5 | 1 | 4 | 3 | 1 |   |
| arCOG00809 | COG0495 | J | Leucyl-tRNA synthetase                                  | 3 | 3 | 5 | 2 | 1 | 1 | 1 | 4 | 2 | 3 | 3 | 1 | 5 | 1 | 4 | 3 | 1 |   |
| arCOG00810 | COG0143 | J | Methionyl-tRNA synthetase                               | 3 | 3 | 5 | 2 | 1 | 1 | 1 | 4 | 2 | 3 | 3 | 1 | 5 | 1 | 4 | 3 | 1 |   |
| arCOG00811 | COG0440 | E | Acetolactate synthase, small subunit                    | 3 | 0 | 0 | 0 | 0 | 0 | 0 | 0 | 0 | 0 | 0 | 0 | 0 | 0 | 4 | 0 | 0 |   |
| arCOG00812 | COG2002 | K | Transcriptional regulator AbrB                          | 2 | 0 | 1 | 0 | 0 | 1 | 0 | 1 | 0 | 0 | 0 | 0 | 0 | 2 | 0 | 0 | 0 |   |
| arCOG00813 | COG1707 | R | ACT domain-containing protein                           | 0 | 0 | 0 | 0 | 0 | 0 | 1 | 0 | 2 | 3 | 3 | 1 | 1 | 1 | 0 | 0 | 0 |   |
| arCOG00814 | COG1707 | K | HTH and ACT domains                                     | 0 | 0 | 0 | 0 | 0 | 0 | 0 | 0 | 0 | 3 | 0 | 0 | 0 | 1 | 0 | 0 | 0 |   |
| arCOG00815 | COG2002 | K | Transcriptional regulator AbrB                          | 1 | 3 | 2 | 0 | 0 | 0 | 1 | 0 | 0 | 0 | 0 | 1 | 0 | 0 | 4 | 0 | 0 |   |
| arCOG00816 | COG2002 | K | Transcriptional regulator AbrB                          | 0 | 3 | 2 | 0 | 0 | 0 | 0 | 0 | 0 | 0 | 0 | 0 | 0 | 0 | 0 | 1 | 0 |   |
| arCOG00817 | COG2002 | K | Transcriptional regulator AbrB                          | 0 | 2 | 0 | 0 | 0 | 0 | 0 | 0 | 0 | 0 | 0 | 0 | 0 | 0 | 0 | 0 | 0 |   |
| arCOG00818 | COG2002 | K | Transcriptional regulator AbrB                          | 1 | 2 | 0 | 0 | 0 | 0 | 0 | 3 | 0 | 0 | 1 | 0 | 0 | 0 | 1 | 0 | 0 |   |
| arCOG00819 | COG2002 | K | AbrB family transcriptional regulator                   | 0 | 0 | 0 | 0 | 0 | 0 | 0 | 0 | 0 | 0 | 1 | 0 | 0 | 0 | 1 | 0 | 0 |   |
| arCOG00820 | COG2002 | K | Transcriptional regulator AbrB                          | 2 | 3 | 1 | 0 | 0 | 0 | 0 | 0 | 0 | 0 | 0 | 0 | 0 | 0 | 0 | 0 | 0 |   |
| arCOG00821 | COG2002 | K | AbrB family transcriptional regulator                   | 1 | 0 | 2 | 0 | 0 | 0 | 0 | 0 | 0 | 0 | 0 | 0 | 0 | 0 | 0 | 0 | 0 |   |
| arCOG00822 | COG2002 | K | Transcriptional regulator AbrB                          | 0 | 0 | 0 | 0 | 0 | 0 | 0 | 0 | 0 | 0 | 0 | 0 | 0 | 0 | 0 | 0 | 0 |   |
| arCOG00823 | COG2002 | K | Transcriptional regulator AbrB                          | 1 | 1 | 1 | 0 | 1 | 0 | 0 | 0 | 0 | 0 | 0 | 0 | 0 | 0 | 0 | 0 | 0 |   |
| arCOG00824 | COG2002 | K | Transcriptional regulator AbrB                          | 1 | 1 | 1 | 0 | 0 | 1 | 0 | 0 | 0 | 0 | 0 | 0 | 0 | 0 | 0 | 0 | 0 |   |
| arCOG00825 | COG2002 | K | Transcriptional regulator AbrB                          | 1 | 0 | 2 | 0 | 0 | 0 | 0 | 0 | 0 | 0 | 0 | 0 | 0 | 0 | 0 | 0 | 0 |   |
| arCOG00826 | COG0454 | K | Acetyltransferase (GNAT) family                         | 1 | 3 | 5 | 2 | 1 | 1 | 1 | 4 | 2 | 3 | 2 | 1 | 5 | 0 | 4 | 3 | 0 |   |
| arCOG00827 | COG1246 | E | Acetyltransferase (GNAT) family                         | 0 | 0 | 0 | 0 | 0 | 0 | 0 | 0 | 0 | 0 | 0 | 0 | 4 | 0 | 0 | 0 | 0 |   |
| arCOG00828 | COG1393 | R | Predicted acetyltransferase                             | 0 | 0 | 0 | 0 | 0 | 0 | 0 | 0 | 0 | 0 | 0 | 1 | 0 | 0 | 0 | 0 | 0 |   |
| arCOG00830 | COG1247 | M | Sortase or related acyltransferase                      | 0 | 0 | 0 | 0 | 0 | 0 | 0 | 1 | 0 | 0 | 2 | 1 | 3 | 0 | 0 | 0 | 0 |   |
| arCOG00831 | COG0454 | K | Acetyltransferase (GNAT) family                         | 0 | 0 | 0 | 0 | 0 | 0 | 0 | 3 | 0 | 0 | 0 | 0 | 0 | 0 | 0 | 0 | 0 |   |
| arCOG00832 | COG0454 | K | Acetyltransferase (GNAT) family                         | 0 | 0 | 0 | 0 | 0 | 0 | 0 | 0 | 0 | 0 | 1 | 1 | 3 | 0 | 0 | 0 | 0 |   |
| arCOG00833 | COG0456 | R | Acetyltransferase (GNAT) family                         | 3 | 3 | 5 | 2 | 1 | 1 | 1 | 4 | 2 | 3 | 3 | 1 | 5 | 1 | 4 | 3 | 0 |   |
| arCOG00834 | COG0454 | K | Acetyltransferase (GNAT) family                         | 1 | 0 | 0 | 0 | 0 | 1 | 0 | 0 | 0 | 0 | 1 | 0 | 2 | 0 | 1 | 0 | 0 |   |
| arCOG00836 | COG1247 | M | Sortase or related acyltransferase                      | 0 | 0 | 0 | 0 | 0 | 0 | 0 | 0 | 0 | 0 | 0 | 0 | 0 | 0 | 0 | 0 | 0 |   |
| arCOG00837 | COG0456 | R | Acetyltransferase (GNAT) family                         | 0 | 1 | 1 | 0 | 0 | 0 | 0 | 1 | 0 | 0 | 0 | 0 | 0 | 0 | 0 | 0 | 0 |   |
| arCOG00838 | COG0454 | K | Acetyltransferase (GNAT) family                         | 0 | 0 | 0 | 0 | 0 | 0 | 1 | 4 | 0 | 0 | 1 | 0 | 3 | 0 | 0 | 0 | 0 |   |
| arCOG00839 | COG0454 | K | Acetyltransferase (GNAT) family                         | 0 | 0 | 0 | 0 | 0 | 0 | 0 | 3 | 0 | 0 | 3 | 1 | 3 | 0 | 0 | 0 | 0 |   |
| arCOG00840 | COG1246 | E | Acetyltransferase (GNAT) family                         | 0 | 0 | 0 | 0 | 0 | 0 | 0 | 4 | 0 | 0 | 1 | 0 | 0 | 0 | 0 | 0 | 0 |   |
| arCOG00842 | COG1670 | J | Acetyltransferase, RimL family                          | 0 | 0 | 0 | 0 | 0 | 0 | 0 | 2 | 0 | 2 | 3 | 1 | 3 | 0 | 2 | 3 | 0 |   |
| arCOG00843 | COG1670 | J | Acetyltransferase, RimL family                          | 0 | 0 | 0 | 0 | 0 | 0 | 0 | 0 | 0 | 0 | 0 | 2 | 0 | 0 | 0 | 0 | 0 |   |
| arCOG00844 | COG0454 | K | Acetyltransferase (GNAT) family                         | 0 | 0 | 0 | 0 | 0 | 1 | 0 | 4 | 0 | 0 | 1 | 1 | 1 | 0 | 4 | 2 | 0 |   |
| arCOG00845 | COG0454 | K | Acetyltransferase (GNAT) family                         | 0 | 0 | 4 | 2 | 0 | 0 | 0 | 4 | 0 | 0 | 0 | 0 | 0 | 0 | 4 | 2 | 0 |   |
| arCOG00846 | COG0454 | K | Acetyltransferase (GNAT) family                         | 0 | 0 | 0 | 0 | 0 | 0 | 0 | 0 | 0 | 0 | 0 | 0 | 0 | 0 | 0 | 3 | 0 |   |
| arCOG00847 | COG0454 | K | Acetyltransferase (GNAT) family                         | 0 | 0 | 0 | 1 | 0 | 0 | 0 | 1 | 0 | 0 | 1 | 1 | 0 | 0 | 0 | 0 | 0 |   |
| arCOG00848 | COG0456 | R | Acetyltransferase (GNAT) family                         | 0 | 0 | 0 | 0 | 0 | 0 | 0 | 3 | 0 | 0 | 0 | 0 | 0 | 0 | 0 | 0 | 0 |   |
| arCOG00849 | COG1353 | R | Predicted acetyltransferase                             | 0 | 0 | 0 | 0 | 0 | 0 | 0 | 1 | 0 | 0 | 0 | 0 | 3 | 0 | 0 | 0 | 0 |   |
| arCOG00850 | COG1353 | R | Predicted acetyltransferase                             | 0 | 0 | 0 | 0 | 0 | 0 | 0 | 0 | 0 | 0 | 0 | 1 | 1 | 0 | 0 | 0 | 0 |   |
| arCOG00851 | COG0454 | K | Acetyltransferase (GNAT) family                         | 0 | 0 | 0 | 0 | 0 | 0 | 0 | 0 | 2 | 0 | 0 | 0 | 0 | 0 | 0 | 0 | 0 |   |
| arCOG00852 | COG0456 | R | Acetyltransferase (GNAT) family                         | 1 | 0 | 1 | 0 | 0 | 0 | 0 | 0 | 0 | 0 | 0 | 0 | 0 | 0 | 0 | 0 | 0 |   |
| arCOG00853 | COG0281 | C | Malic enzyme                                            | 2 | 3 | 4 | 0 | 1 | 1 | 1 | 4 | 0 | 0 | 1 | 0 | 4 | 0 | 4 | 3 | 0 |   |
| arCOG00854 | COG4002 | R | Predicted phosphotransacetylase                         | 0 | 0 | 0 | 0 | 0 | 0 | 0 | 0 | 2 | 3 | 3 | 1 | 5 | 1 | 0 | 0 | 0 |   |
| arCOG00855 | COG0280 | C | Phosphotransacetylase                                   | 0 | 0 | 0 | 0 | 0 | 0 | 0 | 0 | 0 | 0 | 0 | 0 | 3 | 0 | 0 | 0 | 0 |   |
| arCOG00856 | COG0318 | I | Acyl-CoA synthetase (AMP-forming)/AMP-acid lig          | 1 | 3 | 3 | 1 | 1 | 1 | 4 | 2 | 3 | 3 | 1 | 4 | 3 | 0 | 0 | 0 | 0 |   |
| arCOG00857 | COG0318 | I | Acyl-CoA synthetase (AMP-forming)/AMP-acid lig          | 1 | 3 | 1 | 0 | 0 | 0 | 0 | 0 | 0 | 0 | 1 | 3 | 4 | 0 | 0 | 0 | 0 |   |
| arCOG00858 | COG0528 | F | Uridylate kinase                                        | 3 | 3 | 5 | 2 | 1 | 1 | 1 | 4 | 2 | 3 | 3 | 1 | 5 | 1 | 4 | 3 | 0 |   |
| arCOG00859 | COG2054 | R | Uncharacterized archaeal kinase related to aspartoki    | 0 | 0 | 0 | 0 | 0 | 0 | 1 | 4 | 0 | 2 | 3 | 3 | 1 | 5 | 1 | 0 | 0 |   |
| arCOG00860 | COG1608 | R | Predicted archaeal kinase                               | 1 | 3 | 1 | 5 | 2 | 1 | 1 | 1 | 4 | 2 | 3 | 3 | 1 | 5 | 1 | 4 | 3 | 0 |
| arCOG00861 | COG0527 | E | Aspartokinase                                           | 2 | 3 | 4 | 2 | 1 | 1 | 1 | 4 | 2 | 3 | 3 | 1 | 5 | 1 | 4 | 2 | 0 |   |
| arCOG00862 | COG0548 | E | Acetylglutamate kinase                                  | 1 | 3 | 1 | 0 | 0 | 0 | 1 | 3 | 2 | 3 | 3 | 1 | 5 | 1 | 4 | 3 | 1 |   |
| arCOG00863 | COG0549 | E | Carbamate kinase                                        | 3 | 0 | 5 | 0 | 1 | 1 | 1 | 0 | 1 | 0 | 0 | 1 | 0 | 0 | 0 | 4 | 3 | 0 |
| arCOG00864 | COG0263 | E | Glutamate 5-kinase                                      | 0 | 0 | 0 | 0 | 0 | 0 | 0 | 2 | 0 | 0 | 0 | 0 | 4 | 0 | 0 | 0 | 0 |   |
| arCOG00865 | COG1156 | C | Archaeal/vacuolar-type H+-ATPase subunit B              | 3 | 3 | 5 | 2 | 1 | 1 | 1 | 4 | 2 | 3 | 3 | 1 | 5 | 1 | 4 | 3 | 1 |   |
| arCOG00866 | COG0055 | C | FOF1-type ATP synthase, beta subunit                    | 0 | 0 | 0 | 0 | 0 | 0 | 0 | 0 | 0 | 0 | 0 | 0 | 2 | 0 | 0 | 0 | 0 |   |
| arCOG00867 | COG0056 | C | FOF1-type ATP synthase, alpha subunit                   | 0 | 0 | 0 | 0 | 0 | 0 | 0 | 0 | 0 | 0 | 0 | 0 | 2 | 0 | 0 | 0 | 0 |   |
| arCOG00868 | COG1155 | C | Archaeal/vacuolar-type H+-ATPase subunit A              | 3 | 3 | 5 | 2 | 1 | 1 | 1 | 4 | 2 | 3 | 3 | 1 | 5 | 1 | 4 | 3 | 1 |   |
| arCOG00869 | COG1390 | C | Archaeal/vacuolar-type H+-ATPase subunit E              | 3 | 3 | 5 | 2 | 1 | 1 | 1 | 4 | 2 | 3 | 3 | 1 | 5 | 1 | 4 | 3 | 0 |   |
| arCOG00871 | COG0553 | K | Superfamily II DNA/RNA helicase, SNF2 family            | 1 | 0 | 2 | 1 | 0 | 1 | 1 | 4 | 0 | 0 | 0 | 0 | 0 | 0 | 3 | 0 | 0 |   |
| arCOG00872 | COG1111 | L | ERCC4-like helicase                                     | 0 | 0 | 0 | 2 | 1 | 1 | 1 | 4 | 2 | 3 | 3 | 1 | 5 | 1 | 4 | 2 | 1 |   |
| arCOG00873 | COG0322 | L | Excinuclease-associated helix-hairpin-helix domain      | 0 | 0 | 0 | 0 | 0 | 0 | 0 | 0 | 2 | 0 | 0 | 0 | 0 | 0 | 0 | 0 | 0 |   |
| arCOG00874 | COG1061 | K | DNA or RNA helicase of superfamily II                   | 3 | 3 | 4 | 1 | 0 | 1 | 1 | 4 | 0 | 0 | 0 | 1 | 4 | 0 | 3 | 3 | 0 |   |
| arCOG00876 | COG1061 | K | DNA or RNA helicase of superfamily II                   | 0 | 0 | 5 | 0 | 0 | 0 | 0 | 0 | 0 | 0 | 0 | 0 | 0 | 0 | 4 | 0 | 0 |   |
| arCOG00877 | COG1061 | K | DNA or RNA helicase of superfamily II                   | 1 | 1 | 0 | 0 | 0 | 0 | 0 | 0 | 0 | 0 | 0 | 0 | 0 | 0 | 1 | 0 | 0 |   |
| arCOG00878 | COG0610 | V | Type I site-specific restriction-modification system, I | 1 | 0 | 0 | 1 | 0 | 0 | 0 | 1 | 2 | 2 | 1 | 1 | 4 | 0 | 1 | 1 | 0 |   |
| arCOG00879 | COG0610 | V | Type I site-specific restriction-modification system, I | 0 | 0 | 0 | 0 | 0 | 0 | 0 | 0 | 0 | 0 | 1 | 1 | 0 | 3 | 0 | 0 | 0 |   |
| arCOG00880 | COG4096 | V | Type I site-specific restriction-modification system, I | 0 | 0 | 0 | 0 | 0 | 0 | 0 | 0 | 0 | 0 | 1 | 2 | 1 | 4 | 0 | 0 | 0 |   |
| arCOG00881 | COG1061 | K | DNA or RNA helicase of superfamily II                   | 0 | 1 | 0 | 1 | 0 | 0 | 0 | 0 | 1 | 0 | 0 | 1 | 0 | 1 | 0 | 0 | 0 |   |
| arCOG00883 | COG0553 | K | Superfamily II DNA/RNA helicase, SNF2 family            | 0 | 1 | 0 | 2 | 0 | 0 | 0 |   |   |   |   |   |   |   |   |   |   |   |









|            |         |   |                                                                       |   |   |   |   |   |   |   |   |   |   |   |   |   |   |   |   |   |   |
|------------|---------|---|-----------------------------------------------------------------------|---|---|---|---|---|---|---|---|---|---|---|---|---|---|---|---|---|---|
| arCOG01475 | COG0053 | P | Predicted Co/Zn/Cd cation transporter                                 | 0 | 0 | 0 | 0 | 0 | 0 | 1 | 0 | 1 | 0 | 1 | 0 | 4 | 0 | 0 | 0 | 0 |   |
| arCOG01476 | COG0053 | P | Predicted Co/Zn/Cd cation transporter                                 | 0 | 0 | 0 | 0 | 0 | 0 | 0 | 0 | 0 | 0 | 0 | 0 | 0 | 3 | 0 | 0 | 0 |   |
| arCOG01477 | COG1230 | P | Co/Zn/Cd efflux system component                                      | 0 | 3 | 1 | 1 | 0 | 0 | 0 | 0 | 1 | 0 | 0 | 0 | 0 | 3 | 0 | 0 | 0 |   |
| arCOG01478 | COG0053 | P | Predicted Co/Zn/Cd cation transporter                                 | 0 | 1 | 3 | 0 | 0 | 0 | 0 | 0 | 0 | 0 | 0 | 0 | 0 | 0 | 0 | 0 | 0 |   |
| arCOG01479 | COG0053 | P | Predicted Co/Zn/Cd cation transporter                                 | 2 | 0 | 0 | 0 | 0 | 0 | 0 | 0 | 0 | 0 | 0 | 0 | 0 | 0 | 0 | 0 | 0 |   |
| arCOG01480 | COG0053 | P | Predicted Co/Zn/Cd cation transporter                                 | 0 | 0 | 0 | 0 | 0 | 0 | 0 | 2 | 0 | 0 | 0 | 0 | 0 | 0 | 0 | 0 | 0 |   |
| arCOG01481 | COG1488 | H | Nicotinic acid phosphoribosyltransferase                              | 3 | 3 | 5 | 0 | 1 | 1 | 1 | 4 | 0 | 0 | 2 | 0 | 4 | 1 | 4 | 3 | 0 |   |
| arCOG01482 | COG0157 | H | Nicotinate-nucleotide pyrophosphorylase                               | 1 | 3 | 3 | 2 | 0 | 0 | 1 | 3 | 2 | 3 | 3 | 1 | 5 | 1 | 4 | 0 | 0 |   |
| arCOG01483 | COG0157 | H | Nicotinate-nucleotide pyrophosphorylase                               | 0 | 0 | 1 | 0 | 0 | 0 | 0 | 0 | 2 | 1 | 0 | 4 | 0 | 1 | 0 | 0 |   |   |
| arCOG01484 | COG1985 | H | Pyrimidine reductase, riboflavin biosynthesis                         | 3 | 3 | 4 | 2 | 0 | 0 | 1 | 4 | 2 | 3 | 3 | 1 | 5 | 1 | 0 | 1 | 0 |   |
| arCOG01485 | COG0117 | H | Pyrimidine deaminase and reductase                                    | 0 | 0 | 0 | 0 | 0 | 0 | 0 | 0 | 0 | 0 | 0 | 0 | 0 | 0 | 2 | 0 |   |   |
| arCOG01486 | COG1658 | L | Ribonuclease M5 (contains TOPRIM domain)                              | 0 | 0 | 0 | 1 | 1 | 1 | 1 | 0 | 1 | 1 | 0 | 1 | 5 | 0 | 4 | 2 | 0 |   |
| arCOG01487 | COG2131 | F | Deoxycytidylate deaminase                                             | 0 | 0 | 0 | 2 | 0 | 0 | 1 | 0 | 0 | 0 | 1 | 1 | 5 | 0 | 4 | 3 | 0 |   |
| arCOG01488 | COG0590 | F | Cytosine/adenosine deaminase                                          | 0 | 0 | 0 | 0 | 0 | 0 | 0 | 2 | 0 | 2 | 3 | 1 | 4 | 0 | 0 | 0 | 0 |   |
| arCOG01489 | COG1985 | H | Pyrimidine reductase, riboflavin biosynthesis                         | 0 | 0 | 5 | 0 | 0 | 0 | 0 | 0 | 0 | 0 | 1 | 0 | 3 | 0 | 0 | 0 | 0 |   |
| arCOG01490 | COG0262 | H | Dihydrofolate reductase                                               | 0 | 0 | 0 | 0 | 0 | 0 | 0 | 0 | 0 | 0 | 0 | 0 | 3 | 0 | 0 | 0 | 0 |   |
| arCOG01491 | COG0243 | C | Anaerobic dehydrogenase                                               | 2 | 3 | 4 | 0 | 1 | 1 | 1 | 4 | 1 | 3 | 3 | 1 | 2 | 1 | 4 | 2 | 0 |   |
| arCOG01492 | COG3383 | R | Uncharacterized anaerobic dehydrogenase                               | 0 | 3 | 0 | 0 | 0 | 0 | 0 | 2 | 1 | 0 | 1 | 0 | 1 | 0 | 0 | 3 | 0 |   |
| arCOG01493 | COG0243 | C | Formate dehydrogenase alpha subunit, contains mol                     | 0 | 0 | 1 | 0 | 0 | 0 | 1 | 1 | 0 | 0 | 0 | 0 | 1 | 0 | 0 | 0 | 0 |   |
| arCOG01495 | COG0243 | C | Molybdopterin oxidoreductase                                          | 0 | 1 | 3 | 0 | 0 | 0 | 0 | 0 | 0 | 0 | 0 | 0 | 0 | 0 | 0 | 0 | 0 |   |
| arCOG01496 | COG0243 | C | Molybdopterin oxidoreductase, contains molybdopt                      | 0 | 3 | 0 | 0 | 0 | 0 | 1 | 0 | 0 | 0 | 0 | 0 | 0 | 0 | 0 | 0 | 0 |   |
| arCOG01497 | COG5013 | C | Nitrate reductase alpha subunit                                       | 1 | 0 | 2 | 0 | 1 | 0 | 0 | 1 | 0 | 0 | 0 | 0 | 0 | 0 | 0 | 0 | 0 |   |
| arCOG01498 | COG1029 | C | Formylmethanofuran dehydrogenase subunit B                            | 0 | 0 | 0 | 0 | 0 | 0 | 1 | 0 | 0 | 0 | 0 | 0 | 5 | 0 | 0 | 0 | 0 |   |
| arCOG01499 | COG1029 | C | Formylmethanofuran dehydrogenase subunit B                            | 0 | 0 | 0 | 0 | 0 | 0 | 1 | 0 | 2 | 3 | 3 | 1 | 5 | 1 | 0 | 0 | 0 |   |
| arCOG01500 | COG0437 | C | Fe-S-cluster-containing hydrogenase component 1                       | 3 | 3 | 4 | 0 | 1 | 1 | 1 | 3 | 0 | 0 | 1 | 1 | 3 | 0 | 2 | 0 | 0 |   |
| arCOG01501 | COG1140 | C | Nitrate reductase beta subunit                                        | 1 | 0 | 2 | 0 | 1 | 0 | 0 | 2 | 0 | 0 | 0 | 0 | 0 | 0 | 0 | 0 | 0 |   |
| arCOG01502 | COG1142 | C | Fe-S-cluster-containing hydrogenase component 2                       | 0 | 0 | 0 | 0 | 0 | 1 | 1 | 0 | 1 | 0 | 0 | 1 | 4 | 1 | 3 | 0 | 0 |   |
| arCOG01503 | COG0437 | C | Fe-S-cluster-containing hydrogenase component 1                       | 1 | 3 | 4 | 0 | 1 | 0 | 1 | 3 | 0 | 0 | 0 | 0 | 0 | 0 | 0 | 0 | 0 |   |
| arCOG01504 | COG2180 | C | Nitrate reductase delta subunit                                       | 1 | 0 | 2 | 0 | 0 | 0 | 1 | 0 | 0 | 0 | 0 | 0 | 0 | 0 | 0 | 0 | 0 |   |
| arCOG01505 | COG3381 | R | Uncharacterized component of anaerobic dehydroge                      | 0 | 3 | 0 | 0 | 0 | 0 | 0 | 0 | 0 | 0 | 0 | 0 | 0 | 0 | 0 | 0 | 0 |   |
| arCOG01506 | COG3381 | R | Uncharacterized component of anaerobic dehydroge                      | 0 | 1 | 1 | 0 | 1 | 0 | 0 | 3 | 0 | 0 | 0 | 0 | 0 | 0 | 0 | 0 | 0 |   |
| arCOG01507 | COG4904 | S | Uncharacterized protein conserved in archaea                          | 1 | 0 | 2 | 0 | 1 | 0 | 1 | 0 | 0 | 0 | 0 | 0 | 0 | 0 | 0 | 0 | 0 |   |
| arCOG01510 | COG1599 | L | Single-stranded DNA-binding replication protein A                     | 3 | 3 | 1 | 2 | 1 | 0 | 1 | 4 | 2 | 3 | 3 | 1 | 5 | 1 | 4 | 3 | 1 |   |
| arCOG01511 | COG0145 | E | N-methylhydantoinase A/acetone carboxylase, beta                      | 2 | 3 | 4 | 0 | 1 | 0 | 1 | 3 | 0 | 1 | 1 | 0 | 5 | 1 | 0 | 0 | 0 |   |
| arCOG01512 | COG0146 | E | N-methylhydantoinase B/acetone carboxylase, alpha                     | 2 | 3 | 4 | 0 | 1 | 0 | 0 | 3 | 0 | 1 | 0 | 0 | 1 | 0 | 2 | 0 | 0 |   |
| arCOG01513 | COG0145 | E | N-methylhydantoinase A/acetone carboxylase, beta                      | 0 | 0 | 0 | 0 | 0 | 0 | 0 | 0 | 0 | 0 | 0 | 0 | 4 | 0 | 0 | 0 | 0 |   |
| arCOG01514 | COG0145 | E | N-methylhydantoinase A/acetone carboxylase, beta                      | 0 | 0 | 0 | 0 | 0 | 0 | 0 | 0 | 0 | 0 | 0 | 0 | 4 | 0 | 0 | 0 | 0 |   |
| arCOG01515 | COG0145 | E | N-methylhydantoinase A/acetone carboxylase, beta                      | 0 | 0 | 0 | 0 | 0 | 0 | 0 | 0 | 0 | 0 | 0 | 0 | 3 | 0 | 0 | 0 | 0 |   |
| arCOG01516 | COG0145 | E | N-methylhydantoinase A/acetone carboxylase, beta                      | 0 | 0 | 0 | 0 | 0 | 0 | 0 | 0 | 0 | 0 | 0 | 0 | 3 | 0 | 0 | 0 | 0 |   |
| arCOG01517 | COG0145 | E | N-methylhydantoinase A/acetone carboxylase, beta                      | 0 | 0 | 0 | 0 | 0 | 0 | 0 | 0 | 0 | 0 | 0 | 0 | 3 | 0 | 0 | 0 | 0 |   |
| arCOG01518 | COG1363 | G | Cellulase M or related protein                                        | 3 | 0 | 5 | 0 | 0 | 1 | 1 | 4 | 2 | 3 | 3 | 0 | 5 | 1 | 4 | 0 | 0 |   |
| arCOG01519 | COG1363 | G | Cellulase M or related protein                                        | 0 | 0 | 3 | 0 | 0 | 0 | 0 | 0 | 0 | 0 | 0 | 0 | 0 | 0 | 3 | 0 | 0 |   |
| arCOG01520 | COG1363 | G | Cellulase M or related protein                                        | 0 | 0 | 0 | 0 | 0 | 0 | 0 | 0 | 0 | 0 | 0 | 0 | 0 | 0 | 3 | 0 | 0 |   |
| arCOG01521 | COG1233 | Q | Phytoene dehydrogenase or related enzyme                              | 1 | 3 | 1 | 1 | 1 | 1 | 1 | 0 | 4 | 1 | 3 | 2 | 1 | 4 | 0 | 2 | 1 | 0 |
| arCOG01522 | COG1232 | H | Protoporphyrinogen oxidase                                            | 0 | 0 | 2 | 0 | 1 | 0 | 1 | 4 | 0 | 1 | 3 | 0 | 3 | 0 | 1 | 0 | 0 |   |
| arCOG01523 | COG1233 | Q | Phytoene dehydrogenase or related enzyme                              | 0 | 0 | 0 | 0 | 0 | 0 | 0 | 0 | 0 | 0 | 0 | 0 | 0 | 0 | 0 | 0 | 0 |   |
| arCOG01524 | COG1233 | Q | Phytoene dehydrogenase or related enzyme                              | 0 | 0 | 0 | 0 | 0 | 0 | 0 | 0 | 0 | 0 | 0 | 0 | 4 | 0 | 0 | 0 | 0 |   |
| arCOG01525 | COG0562 | M | UDP-galactopyranose mutase                                            | 0 | 0 | 0 | 0 | 0 | 0 | 0 | 0 | 2 | 0 | 0 | 0 | 0 | 0 | 0 | 0 | 0 |   |
| arCOG01526 | COG1110 | L | Reverse gyrase                                                        | 3 | 3 | 5 | 0 | 1 | 1 | 1 | 0 | 0 | 1 | 0 | 0 | 0 | 1 | 4 | 0 | 1 |   |
| arCOG01527 | COG0550 | L | Topoisomerase IA                                                      | 3 | 3 | 5 | 1 | 1 | 1 | 1 | 4 | 2 | 3 | 3 | 1 | 5 | 1 | 4 | 3 | 1 |   |
| arCOG01529 | COG0365 | I | Acyl-coenzyme A synthetase/AMP-(fatty) acid ligas                     | 1 | 3 | 3 | 1 | 0 | 0 | 1 | 3 | 1 | 0 | 0 | 0 | 0 | 0 | 0 | 3 | 0 |   |
| arCOG01530 | COG0365 | H | Molybdenum cofactor biosynthesis enzyme                               | 3 | 3 | 5 | 0 | 1 | 0 | 1 | 3 | 1 | 0 | 0 | 0 | 1 | 4 | 3 | 0 | 0 |   |
| arCOG01531 | COG0151 | S | Uncharacterized conserved protein                                     | 3 | 3 | 0 | 0 | 0 | 0 | 0 | 0 | 0 | 0 | 0 | 0 | 0 | 0 | 0 | 0 | 0 |   |
| arCOG01532 | COG0020 | I | Undecaprenyl pyrophosphate synthase                                   | 3 | 3 | 5 | 2 | 1 | 1 | 1 | 4 | 2 | 3 | 3 | 1 | 5 | 1 | 4 | 3 | 0 |   |
| arCOG01533 | COG0747 | E | ABC-type dipeptide transport system, periplasmic c                    | 3 | 1 | 3 | 0 | 0 | 0 | 0 | 0 | 0 | 0 | 0 | 0 | 0 | 0 | 3 | 2 | 0 |   |
| arCOG01534 | COG0747 | E | ABC-type dipeptide transport system, periplasmic c                    | 2 | 2 | 5 | 0 | 0 | 1 | 1 | 4 | 1 | 0 | 2 | 1 | 4 | 0 | 4 | 2 | 0 |   |
| arCOG01535 | COG0747 | E | ABC-type dipeptide transport system, periplasmic c                    | 0 | 2 | 1 | 0 | 0 | 0 | 0 | 0 | 0 | 0 | 0 | 0 | 0 | 0 | 0 | 0 | 0 |   |
| arCOG01536 | COG0747 | E | ABC-type dipeptide transport system, periplasmic c                    | 0 | 0 | 0 | 0 | 0 | 0 | 0 | 0 | 0 | 0 | 0 | 0 | 0 | 0 | 0 | 0 | 0 |   |
| arCOG01537 | COG0651 | C | NADH:ubiquinone oxidoreductase subunit 4 (chain                       | 3 | 1 | 5 | 2 | 1 | 1 | 1 | 4 | 2 | 3 | 2 | 1 | 3 | 0 | 0 | 0 | 0 |   |
| arCOG01538 | COG1008 | C | NADH dehydrogenase subunit M                                          | 0 | 0 | 0 | 0 | 0 | 0 | 0 | 4 | 0 | 0 | 0 | 0 | 5 | 0 | 0 | 3 | 0 |   |
| arCOG01539 | COG1009 | C | NADH dehydrogenase subunit L                                          | 2 | 3 | 5 | 2 | 1 | 1 | 1 | 4 | 0 | 0 | 3 | 1 | 5 | 0 | 1 | 3 | 0 |   |
| arCOG01540 | COG1007 | C | NADH dehydrogenase subunit N                                          | 2 | 3 | 5 | 2 | 0 | 1 | 1 | 4 | 0 | 0 | 0 | 0 | 5 | 0 | 0 | 3 | 0 |   |
| arCOG01541 | COG0651 | C | Multisubunit Na <sup>+</sup> /H <sup>+</sup> antiporter, MnhD subunit | 0 | 0 | 0 | 0 | 0 | 0 | 0 | 0 | 4 | 0 | 0 | 0 | 0 | 0 | 4 | 0 | 0 |   |
| arCOG01542 | COG1009 | C | NADH dehydrogenase subunit L                                          | 0 | 0 | 2 | 0 | 0 | 0 | 0 | 3 | 0 | 0 | 0 | 0 | 0 | 0 | 0 | 0 | 0 |   |
| arCOG01543 | COG1143 | C | NADH dehydrogenase subunit I                                          | 3 | 3 | 4 | 0 | 1 | 1 | 1 | 4 | 2 | 3 | 3 | 1 | 5 | 1 | 0 | 0 | 0 |   |
| arCOG01544 | COG1143 | C | NADH dehydrogenase subunit I                                          | 0 | 0 | 0 | 0 | 0 | 0 | 0 | 0 | 0 | 0 | 0 | 0 | 1 | 0 | 1 | 0 | 0 |   |
| arCOG01545 | COG0650 | C | Formate hydrogenlyase subunit 4                                       | 1 | 1 | 1 | 0 | 0 | 0 | 0 | 0 | 2 | 3 | 3 | 1 | 3 | 1 | 4 | 2 | 0 |   |
| arCOG01546 | COG1005 | C | NADH dehydrogenase subunit H                                          | 3 | 3 | 5 | 2 | 1 | 1 | 1 | 4 | 0 | 0 | 0 | 1 | 5 | 0 | 0 | 3 | 0 |   |
| arCOG01547 | COG3261 | C | Ni-Fe-hydrogenase III large subunit and subunit G                     | 1 | 1 | 1 | 0 | 0 | 0 | 0 | 0 | 2 | 3 | 3 | 1 | 3 | 1 | 4 | 2 | 0 |   |
| arCOG01548 | COG0649 | C | NADH dehydrogenase subunit D                                          | 3 | 3 | 5 | 2 | 1 | 1 | 1 | 4 | 0 | 0 | 0 | 0 | 5 | 0 | 4 | 3 | 0 |   |
| arCOG01549 | COG1259 | C | Coenzyme F420-reducing hydrogenase, alpha subun                       | 1 | 3 | 4 | 0 | 0 | 0 | 0 | 0 | 2 | 3 | 3 | 1 | 3 | 1 | 0 | 0 | 0 |   |
| arCOG01550 | COG0374 | C | Ni-Fe-hydrogenase I large subunit                                     | 0 | 0 | 3 | 0 | 0 | 0 | 0 | 1 | 0 | 0 | 0 | 0 | 1 | 3 | 0 | 0 | 0 |   |
| arCOG01551 | COG0852 | C | NADH dehydrogenase subunit C                                          | 3 | 3 | 4 | 2 | 1 | 1 | 1 | 0 | 0 | 0 | 0 | 0 | 1 | 4 | 0 | 4 | 3 | 0 |
| arCOG01552 | COG3262 | C | Ni-Fe-hydrogenase III component G                                     | 0 | 0 | 0 | 0 | 0 | 0 | 0 | 0 | 0 | 0 | 0 | 2 | 0 | 0 | 4 | 0 | 0 |   |
| arCOG01553 | COG3260 | C | Ni-Fe-hydrogenase III small subunit                                   | 1 | 1 | 1 | 0 | 0 | 0 | 0 | 0 | 2 | 3 | 3 | 1 | 3 | 1 | 4 | 2 | 0 |   |
| arCOG01554 | COG0377 | C | F420H2 dehydrogenase subunit, related to NADH:u                       | 3 | 3 | 5 | 2 | 1 | 1 | 1 | 4 | 0 | 0 | 0 | 0 | 5 | 0 | 4 | 3 | 0 |   |
| arCOG01555 | COG0852 | C | NADH dehydrogenase subunit C                                          | 0 | 0 | 0 | 0 | 0 | 0 | 0 | 0 | 0 | 0 | 0 | 2 | 0 | 0 | 0 | 0 | 0 |   |
| arCOG01556 | COG3262 | C | Ni-Fe-hydrogenase III component G                                     | 0 | 0 | 0 | 0 | 0 | 0 | 0 | 0 | 0 | 0 | 0 | 2 | 0 | 0 | 0 | 0 | 0 |   |
| arCOG01557 | COG0838 | C | NADH dehydrogenase subunit A                                          | 2 | 3 | 5 | 2 | 1 | 1 | 1 | 4 | 0 | 0 | 0 | 0 | 5 | 0 | 0 | 3 | 0 |   |
| arCOG01559 | COG0480 | J | Translation elongation factor G, EF-G (GTPase)                        | 3 | 3 | 5 | 2 | 1 | 1 | 1 | 4 | 2 | 3 | 3 | 1 | 5 | 1 | 4 | 3 | 1 |   |
| arCOG01560 | COG0532 | J | Translation initiation factor 2 (IF-2; GTPase)                        | 3 | 3 | 5 | 2 | 1 | 1 | 1 | 4 | 2 | 3 | 3 | 1 | 5 | 1 | 4 | 3 | 1 |   |
| arCOG01561 | COG5256 | J | Translation elongation factor EF-1alpha (GTPase)                      |   |   |   |   |   |   |   |   |   |   |   |   |   |   |   |   |   |   |







|           |          |   |                                                         |   |   |   |   |   |   |   |   |   |   |   |   |   |   |   |   |   |   |
|-----------|----------|---|---------------------------------------------------------|---|---|---|---|---|---|---|---|---|---|---|---|---|---|---|---|---|---|
| acCG02013 | COG10213 | F | Thymidine phosphorylase                                 | 1 | 0 | 1 | 0 | 0 | 0 | 0 | 1 | 1 | 0 | 3 | 3 | 1 | 5 | 0 | 4 | 0 | 0 |
| acCG02014 | COG0147  | E | Anthraniolate/para-aminobenzoate synthase compone       | 1 | 3 | 4 | 2 | 0 | 0 | 0 | 0 | 1 | 4 | 2 | 3 | 3 | 1 | 5 | 1 | 3 | 3 |
| acCG02015 | COG1169  | H | Menquinone-specific isochorismate synthase              | 0 | 0 | 0 | 0 | 0 | 0 | 0 | 0 | 4 | 0 | 0 | 0 | 0 | 0 | 0 | 0 | 0 |   |
| acCG02016 | COG1853  | R | Conserved protein/domain typically associated with      | 1 | 0 | 3 | 0 | 1 | 0 | 0 | 0 | 0 | 0 | 0 | 0 | 1 | 3 | 0 | 0 | 0 |   |
| acCG02017 | COG1853  | R | Conserved protein/domain typically associated with      | 2 | 3 | 5 | 0 | 1 | 1 | 1 | 1 | 2 | 0 | 2 | 1 | 4 | 0 | 4 | 1 | 0 |   |
| acCG02018 | COG1853  | R | Conserved protein/domain typically associated with      | 0 | 0 | 3 | 0 | 0 | 0 | 0 | 0 | 0 | 0 | 0 | 0 | 0 | 0 | 0 | 0 | 0 |   |
| acCG02019 | COG2897  | P | Rhodanese-related sulfurtransferase                     | 1 | 0 | 0 | 0 | 0 | 0 | 0 | 1 | 1 | 1 | 1 | 1 | 1 | 3 | 0 | 0 | 0 |   |
| acCG02020 | COG2603  | R | Predicted ATPase                                        | 0 | 0 | 0 | 0 | 0 | 0 | 0 | 0 | 0 | 0 | 3 | 0 | 0 | 0 | 0 | 0 | 0 |   |
| acCG02021 | COG0607  | P | Rhodanese-related sulfurtransferase                     | 0 | 3 | 1 | 1 | 0 | 0 | 0 | 4 | 1 | 0 | 2 | 1 | 4 | 0 | 0 | 3 | 0 |   |
| acCG02022 | COG0491  | R | Rhodanese-related sulfurtransferase                     | 0 | 0 | 0 | 0 | 0 | 0 | 0 | 0 | 0 | 0 | 0 | 0 | 4 | 0 | 0 | 0 | 0 |   |
| acCG02023 | COG0301  | H | Rhodanese Homology Domain                               | 0 | 0 | 3 | 0 | 0 | 0 | 0 | 0 | 0 | 0 | 0 | 0 | 0 | 0 | 0 | 1 | 0 |   |
| acCG02024 | COG4881  | S | Predicted membrane protein                              | 1 | 0 | 0 | 0 | 1 | 0 | 1 | 0 | 0 | 0 | 0 | 0 | 0 | 0 | 0 | 0 | 0 |   |
| acCG02025 | COG5557  | C | Polysulphide reductase                                  | 1 | 3 | 0 | 0 | 0 | 0 | 1 | 0 | 3 | 0 | 0 | 0 | 0 | 0 | 0 | 0 | 0 |   |
| acCG02026 | COG5557  | C | Polysulphide reductase                                  | 1 | 1 | 1 | 0 | 0 | 0 | 0 | 0 | 0 | 0 | 0 | 0 | 0 | 0 | 0 | 0 | 0 |   |
| acCG02027 | COG3301  | P | Formate-dependent nitrite reductase, membrane con       | 0 | 3 | 3 | 0 | 1 | 0 | 1 | 0 | 0 | 0 | 0 | 0 | 0 | 0 | 0 | 0 | 0 |   |
| acCG02028 | COG5012  | R | Predicted cobalamin binding protein                     | 1 | 0 | 1 | 0 | 0 | 0 | 1 | 1 | 0 | 0 | 2 | 0 | 1 | 4 | 0 | 0 | 0 |   |
| acCG02029 | COG1410  | E | Methionine synthase I, cobalamin-binding domain         | 0 | 0 | 0 | 1 | 0 | 0 | 0 | 0 | 0 | 0 | 0 | 0 | 0 | 0 | 0 | 0 | 0 |   |
| acCG02030 | COG5012  | R | Predicted cobalamin binding protein                     | 0 | 0 | 0 | 0 | 0 | 0 | 0 | 0 | 0 | 0 | 0 | 0 | 1 | 4 | 0 | 0 | 0 |   |
| acCG02031 | COG5012  | R | Predicted cobalamin binding protein                     | 0 | 0 | 0 | 0 | 0 | 0 | 0 | 0 | 0 | 0 | 0 | 0 | 0 | 4 | 0 | 0 | 0 |   |
| acCG02032 | COG5012  | R | Predicted cobalamin binding protein                     | 0 | 0 | 0 | 0 | 0 | 0 | 0 | 0 | 1 | 0 | 0 | 0 | 4 | 0 | 0 | 0 | 0 |   |
| acCG02033 | COG5012  | R | Predicted cobalamin binding protein                     | 0 | 0 | 0 | 0 | 0 | 0 | 0 | 0 | 1 | 0 | 0 | 0 | 2 | 0 | 0 | 0 | 0 |   |
| acCG02034 | COG5012  | R | Predicted cobalamin binding protein                     | 0 | 0 | 0 | 0 | 0 | 0 | 0 | 0 | 0 | 0 | 0 | 0 | 3 | 0 | 0 | 0 | 0 |   |
| acCG02035 | COG3894  | R | Uncharacterized metal-binding protein                   | 1 | 0 | 1 | 0 | 0 | 1 | 1 | 0 | 0 | 1 | 2 | 1 | 1 | 4 | 0 | 0 | 0 | 0 |
| acCG02036 | COG3894  | C | Methyltransferase activation protein, predicted flavo   | 0 | 0 | 0 | 0 | 0 | 0 | 0 | 0 | 0 | 0 | 0 | 0 | 0 | 0 | 0 | 0 | 0 |   |
| acCG02037 | COG1378  | K | Sugar-specific transcriptional regulator TrmB           | 0 | 3 | 4 | 2 | 1 | 1 | 1 | 1 | 4 | 2 | 1 | 2 | 1 | 3 | 0 | 4 | 3 | 1 |
| acCG02038 | COG1378  | K | Sugar-specific transcriptional regulator TrmB           | 2 | 1 | 2 | 0 | 0 | 0 | 0 | 3 | 0 | 0 | 0 | 0 | 0 | 1 | 1 | 3 | 3 | 0 |
| acCG02039 | COG1502  | I | Phosphatidylserine/phosphatidylglycerophosphate/c       | 0 | 0 | 0 | 1 | 0 | 0 | 1 | 1 | 3 | 0 | 0 | 3 | 0 | 1 | 0 | 0 | 0 | 0 |
| acCG02040 | COG1502  | I | Phosphatidylserine/phosphatidylglycerophosphate/c       | 0 | 0 | 4 | 0 | 0 | 0 | 1 | 0 | 0 | 0 | 2 | 0 | 0 | 0 | 0 | 1 | 3 | 0 |
| acCG02042 | COG1378  | K | Predicted transcriptional regulator                     | 1 | 0 | 0 | 0 | 0 | 0 | 0 | 0 | 0 | 0 | 0 | 0 | 3 | 0 | 0 | 0 | 0 |   |
| acCG02043 | COG1287  | P | Uncharacterized membrane protein, required for N-1      | 0 | 0 | 0 | 0 | 0 | 0 | 0 | 0 | 0 | 0 | 0 | 0 | 1 | 5 | 0 | 0 | 1 |   |
| acCG02044 | COG1287  | P | Uncharacterized membrane protein, required for N-1      | 2 | 3 | 5 | 0 | 1 | 1 | 0 | 0 | 2 | 3 | 0 | 0 | 0 | 0 | 4 | 0 | 1 | 0 |
| acCG02046 | COG3875  | S | Uncharacterized conserved protein                       | 0 | 0 | 0 | 2 | 0 | 0 | 1 | 0 | 0 | 0 | 0 | 0 | 3 | 0 | 0 | 0 | 0 |   |
| acCG02047 | COG3875  | S | Uncharacterized conserved protein                       | 0 | 0 | 0 | 0 | 0 | 1 | 0 | 0 | 0 | 0 | 0 | 0 | 1 | 5 | 0 | 0 | 0 |   |
| acCG02048 | COG1587  | H | Uroporphyrinogen-III synthase                           | 1 | 3 | 4 | 2 | 0 | 0 | 1 | 4 | 2 | 3 | 3 | 1 | 4 | 1 | 0 | 3 | 0 |   |
| acCG02049 | COG1587  | H | Uroporphyrinogen-III synthase                           | 0 | 0 | 0 | 0 | 0 | 0 | 0 | 0 | 0 | 0 | 0 | 0 | 0 | 0 | 0 | 0 | 0 |   |
| acCG02050 | COG0730  | R | Predicted permease                                      | 3 | 3 | 5 | 2 | 1 | 1 | 1 | 3 | 2 | 3 | 3 | 1 | 5 | 1 | 4 | 3 | 0 |   |
| acCG02052 | COG0730  | R | Predicted permease                                      | 0 | 0 | 1 | 0 | 0 | 0 | 1 | 0 | 0 | 0 | 0 | 0 | 0 | 0 | 0 | 0 | 0 |   |
| acCG02053 | COG0589  | T | Nucleotide-binding protein, UspA family                 | 2 | 3 | 5 | 2 | 1 | 1 | 1 | 4 | 2 | 3 | 3 | 1 | 5 | 1 | 3 | 3 | 0 |   |
| acCG02054 | COG2881  | S | Uncharacterized protein conserved in archaea            | 0 | 0 | 0 | 0 | 0 | 0 | 1 | 2 | 0 | 0 | 1 | 3 | 1 | 4 | 0 | 0 | 0 |   |
| acCG02055 | COG0155  | P | Sulfite reductase, beta subunit (hemoprotein)           | 0 | 3 | 2 | 2 | 0 | 0 | 1 | 3 | 0 | 0 | 0 | 0 | 0 | 0 | 0 | 0 | 0 |   |
| acCG02056 | COG0251  | C | Sulfite or nitrite reductase, assimilatory-type, 4Fe-4S | 0 | 0 | 0 | 0 | 0 | 0 | 0 | 0 | 0 | 0 | 0 | 0 | 0 | 0 | 0 | 0 | 0 |   |
| acCG02057 | COG2221  | C | Dissimilatory sulfite reductase (desulfoferritin), alph | 0 | 0 | 4 | 0 | 0 | 0 | 1 | 0 | 0 | 0 | 0 | 0 | 0 | 0 | 0 | 0 | 0 |   |
| acCG02058 | COG2221  | C | Dissimilatory sulfite reductase (desulfoferritin), alph | 0 | 0 | 2 | 0 | 0 | 0 | 0 | 0 | 0 | 0 | 0 | 0 | 0 | 0 | 0 | 0 | 0 |   |
| acCG02059 | COG2221  | C | Dissimilatory sulfite reductase (desulfoferritin), alph | 0 | 0 | 4 | 0 | 0 | 0 | 1 | 0 | 1 | 2 | 3 | 0 | 4 | 1 | 0 | 0 | 0 |   |
| acCG02060 | COG1145  | C | Ferredoxin                                              | 0 | 0 | 0 | 0 | 0 | 0 | 0 | 0 | 0 | 1 | 0 | 0 | 0 | 4 | 0 | 0 | 0 |   |
| acCG02061 | COG1035  | C | Coenzyme F420-reducing hydrogenase, beta subunit        | 0 | 0 | 0 | 0 | 0 | 0 | 0 | 0 | 0 | 1 | 1 | 0 | 0 | 1 | 0 | 0 | 0 |   |
| acCG02062 | COG0421  | C | Predicted redox protein, regulator of disulfide bond 1  | 0 | 3 | 4 | 0 | 0 | 1 | 1 | 1 | 3 | 0 | 0 | 0 | 4 | 0 | 0 | 2 | 0 |   |
| acCG02063 | COG2210  | R | Peroxioredoxin family protein                           | 0 | 3 | 3 | 0 | 0 | 0 | 0 | 0 | 0 | 0 | 0 | 0 | 0 | 0 | 0 | 0 | 0 |   |
| acCG02065 | COG2210  | R | Peroxioredoxin family protein                           | 0 | 3 | 3 | 0 | 0 | 0 | 0 | 0 | 0 | 0 | 0 | 0 | 0 | 0 | 0 | 0 | 0 |   |
| acCG02066 | COG2044  | R | Predicted peroxiredoxins                                | 0 | 3 | 3 | 0 | 0 | 0 | 0 | 1 | 3 | 0 | 0 | 0 | 1 | 0 | 0 | 0 | 0 |   |
| acCG02067 | COG2044  | R | Predicted peroxiredoxins                                | 0 | 3 | 2 | 0 | 0 | 0 | 0 | 0 | 0 | 0 | 0 | 0 | 0 | 0 | 0 | 0 | 0 |   |
| acCG02068 | COG1553  | P | Uncharacterized conserved protein involved in intra     | 0 | 0 | 0 | 0 | 0 | 0 | 1 | 1 | 3 | 0 | 0 | 0 | 4 | 1 | 0 | 0 | 0 |   |
| acCG02069 | COG1923  | P | Uncharacterized protein involved in the oxidation of    | 0 | 0 | 0 | 0 | 0 | 0 | 0 | 0 | 0 | 0 | 0 | 0 | 0 | 0 | 0 | 0 | 0 |   |
| acCG02070 | COG2044  | R | Predicted peroxiredoxins                                | 0 | 0 | 0 | 0 | 0 | 0 | 0 | 0 | 0 | 0 | 0 | 0 | 3 | 0 | 0 | 0 | 0 |   |
| acCG02071 | COG0425  | O | Predicted redox protein, regulator of disulfide bond 1  | 0 | 0 | 0 | 0 | 0 | 0 | 0 | 0 | 0 | 0 | 0 | 0 | 0 | 0 | 0 | 0 | 0 |   |
| acCG02072 | COG0425  | O | Predicted redox protein, regulator of disulfide bond 1  | 0 | 3 | 0 | 0 | 0 | 0 | 0 | 0 | 0 | 0 | 0 | 0 | 0 | 0 | 0 | 0 | 0 |   |
| acCG02073 | COG0425  | S | Uncharacterized conserved protein                       | 0 | 0 | 3 | 0 | 0 | 0 | 0 | 0 | 0 | 0 | 0 | 0 | 0 | 0 | 0 | 0 | 0 |   |
| acCG02074 | COG0425  | O | Predicted redox protein, regulator of disulfide bond 1  | 0 | 2 | 0 | 0 | 0 | 0 | 0 | 0 | 0 | 0 | 0 | 0 | 0 | 0 | 0 | 0 | 0 |   |
| acCG02075 | COG2044  | R | Uncharacterized conserved protein                       | 0 | 1 | 0 | 0 | 0 | 0 | 1 | 0 | 0 | 0 | 0 | 0 | 0 | 0 | 1 | 0 | 0 |   |
| acCG02076 | COG2044  | R | Predicted peroxiredoxins                                | 0 | 2 | 0 | 0 | 0 | 0 | 0 | 0 | 0 | 0 | 0 | 0 | 0 | 0 | 0 | 0 | 0 |   |
| acCG02077 | COG0822  | C | NifU homolog involved in Fe-S cluster formation         | 0 | 0 | 0 | 2 | 1 | 1 | 1 | 1 | 4 | 1 | 0 | 3 | 1 | 5 | 0 | 0 | 0 |   |
| acCG02078 | COG1852  | S | Uncharacterized conserved protein                       | 0 | 0 | 0 | 0 | 0 | 1 | 1 | 0 | 0 | 2 | 3 | 3 | 1 | 5 | 0 | 1 | 0 |   |
| acCG02079 | COG1361  | M | S-layer domain                                          | 0 | 0 | 0 | 2 | 0 | 0 | 1 | 4 | 0 | 2 | 1 | 0 | 5 | 0 | 3 | 0 | 1 |   |
| acCG02080 | COG1361  | M | S-layer domain                                          | 0 | 0 | 0 | 2 | 0 | 0 | 1 | 4 | 0 | 2 | 1 | 0 | 5 | 0 | 3 | 0 | 1 |   |
| acCG02081 | COG1470  | S | Predicted membrane protein                              | 0 | 0 | 1 | 0 | 0 | 1 | 1 | 0 | 0 | 0 | 0 | 0 | 1 | 4 | 0 | 1 | 0 |   |
| acCG02082 | COG1361  | M | S-layer domain                                          | 0 | 0 | 0 | 0 | 0 | 0 | 1 | 0 | 0 | 1 | 0 | 0 | 0 | 1 | 0 | 0 | 0 |   |
| acCG02083 | COG1361  | M | S-layer domain                                          | 0 | 0 | 0 | 0 | 0 | 0 | 1 | 0 | 0 | 0 | 0 | 0 | 1 | 5 | 0 | 0 | 0 |   |
| acCG02085 | COG1361  | M | S-layer domain                                          | 0 | 0 | 0 | 0 | 0 | 0 | 0 | 2 | 0 | 0 | 0 | 0 | 1 | 0 | 0 | 0 | 0 |   |
| acCG02086 | COG1361  | M | S-layer domain                                          | 0 | 0 | 1 | 0 | 0 | 0 | 0 | 1 | 0 | 0 | 2 | 1 | 5 | 0 | 1 | 0 | 0 |   |
| acCG02087 | COG1470  | S | Predicted membrane protein                              | 0 | 0 | 0 | 0 | 0 | 0 | 0 | 0 | 0 | 0 | 0 | 0 | 1 | 0 | 0 | 0 | 0 |   |
| acCG02088 | COG1361  | M | S-layer domain                                          | 1 | 0 | 0 | 0 | 0 | 0 | 0 | 1 | 0 | 0 | 0 | 0 | 0 | 1 | 0 | 0 | 0 |   |
| acCG02089 | COG1361  | M | S-layer domain                                          | 0 | 3 | 3 | 0 | 1 | 0 | 0 | 0 | 0 | 0 | 0 | 0 | 0 | 0 | 0 | 3 | 0 |   |
| acCG02090 | COG1361  | M | S-layer domain                                          | 0 | 0 | 4 | 0 | 0 | 0 | 0 | 0 | 0 | 0 | 0 | 0 | 0 | 0 | 0 | 0 | 0 |   |
| acCG02091 | COG1361  | M | S-layer domain                                          | 2 | 0 | 0 | 0 | 1 | 0 | 0 | 0 | 0 | 0 | 0 | 0 | 0 | 0 | 0 | 0 | 0 |   |
| acCG02092 | COG1119  | E | Isopropylmalate/homocitrate/citramalate synthase        | 0 | 3 | 2 | 1 | 0 | 0 | 1 | 3 | 2 | 0 | 3 | 1 | 4 | 4 | 2 | 0 | 0 |   |
| acCG02093 | COG0119  | E | Isopropylmalate/homocitrate/citramalate synthase        | 0 | 0 | 1 | 0 | 0 | 0 | 1 | 0 | 0 | 0 | 0 | 0 | 5 | 0 | 0 | 0 | 0 |   |
| acCG02094 | COG0119  | E | Isopropylmalate/homocitrate/citramalate synthase        | 0 | 0 | 0 | 0 | 0 | 0 | 0 | 0 | 0 | 0 | 0 | 0 | 2 | 0 | 0 | 0 | 0 |   |
| acCG02095 | COG5016  | C | Pyruvate/oxaloacetate carboxyltransferase               | 1 | 0 | 1 | 2 | 0 | 0 | 0 | 1 | 0 | 2 | 3 | 3 | 1 | 5 | 0 | 2 | 0 |   |
| acCG02096 | COG0119  | E | Isopropylmalate/homocitrate/citramalate synthase        | 0 | 0 | 0 | 0 | 0 | 0 | 0 | 0 | 0 | 0 | 0 | 0 | 0 | 2 | 0 | 0 | 0 |   |
| acCG02097 | COG0710  | C | 3-dehydroquinate dehydratase                            | 1 | 3 | 4 | 2 | 1 | 1 | 1 | 4 | 2 | 3 | 2 | 1 | 5 | 1 | 3 | 3 | 0 |   |
| acCG02098 | COG1605  | S | Chromate mutase                                         | 0 | 0 | 0 | 0 | 0 | 0 | 0 | 0 | 0 | 0 | 0 | 0 | 0 | 0 | 2 | 0 | 0 |   |
| acCG02099 | COG1321  | K | Mn-dependent transcriptional regulator (DtxR family     | 1 | 3 | 1 | 0 | 0 | 0 | 1 | 4 | 2 | 2 | 3 | 1 | 4 | 0 | 0 | 3 | 0 |   |
| acCG02100 | COG1321  | K | Mn-dependent transcriptional regulator (DtxR family     | 2 | 3 | 3 | 2 | 1 | 1 | 1 | 4 | 1 | 1 | 3 | 1 | 4 | 1 | 4 | 3 | 0 |   |
| acCG02101 | COG1321  | K | Mn-dependent transcriptional regulator (DtxR family     | 0 | 0 | 0 | 0 | 0 | 0 |   |   |   |   |   |   |   |   |   |   |   |   |







|            |         |   |                                                      |   |   |   |   |   |   |   |   |   |   |   |   |   |   |   |   |   |   |
|------------|---------|---|------------------------------------------------------|---|---|---|---|---|---|---|---|---|---|---|---|---|---|---|---|---|---|
| arCOG02579 | COG0727 | R | Predicted Fe-S-cluster oxidoreductase                | 2 | 0 | 5 | 2 | 0 | 0 | 1 | 1 | 4 | 0 | 3 | 3 | 1 | 5 | 0 | 4 | 0 | 0 |
| arCOG02581 | COG0727 | R | Predicted Fe-S-cluster oxidoreductase                | 0 | 0 | 0 | 0 | 0 | 0 | 0 | 0 | 1 | 1 | 0 | 0 | 3 | 1 | 4 | 0 | 0 | 0 |
| arCOG02582 | COG0727 | R | Predicted Fe-S-cluster oxidoreductase                | 0 | 0 | 0 | 0 | 0 | 0 | 0 | 0 | 0 | 0 | 0 | 0 | 0 | 4 | 0 | 0 | 0 |   |
| arCOG02583 | COG0727 | R | Predicted Fe-S-cluster oxidoreductase                | 0 | 0 | 0 | 0 | 0 | 0 | 0 | 0 | 0 | 0 | 0 | 0 | 3 | 0 | 0 | 0 | 0 |   |
| arCOG02584 | COG0727 | R | Predicted Fe-S-cluster oxidoreductase                | 2 | 0 | 4 | 0 | 0 | 0 | 0 | 0 | 0 | 0 | 0 | 0 | 0 | 0 | 0 | 0 | 0 |   |
| arCOG02585 | COG0727 | R | Predicted Fe-S-cluster oxidoreductase                | 1 | 0 | 4 | 0 | 0 | 0 | 0 | 0 | 0 | 0 | 0 | 0 | 0 | 0 | 0 | 0 | 0 |   |
| arCOG02586 | COG0727 | R | Predicted Fe-S-cluster oxidoreductase                | 0 | 3 | 0 | 0 | 0 | 0 | 1 | 0 | 0 | 0 | 0 | 0 | 0 | 1 | 0 | 0 | 0 |   |
| arCOG02587 | COG1146 | C | Ferredoxin                                           | 0 | 0 | 1 | 0 | 0 | 0 | 1 | 0 | 1 | 3 | 0 | 0 | 0 | 0 | 0 | 0 | 3 |   |
| arCOG02588 | COG1145 | C | Ferredoxin                                           | 0 | 0 | 0 | 0 | 0 | 0 | 0 | 0 | 0 | 0 | 0 | 0 | 2 | 0 | 0 | 0 | 0 |   |
| arCOG02589 | COG0784 | T | Rec domain                                           | 0 | 0 | 0 | 0 | 0 | 0 | 1 | 2 | 1 | 0 | 1 | 0 | 5 | 0 | 0 | 0 | 0 |   |
| arCOG02590 | COG0643 | N | Rec domain                                           | 0 | 0 | 0 | 0 | 0 | 0 | 0 | 0 | 0 | 0 | 2 | 0 | 0 | 0 | 0 | 0 | 0 |   |
| arCOG02591 | COG0784 | T | Rec domain                                           | 0 | 0 | 0 | 0 | 0 | 0 | 0 | 0 | 0 | 0 | 0 | 1 | 0 | 3 | 0 | 0 | 0 |   |
| arCOG02592 | COG0784 | T | Rec domain                                           | 0 | 0 | 0 | 0 | 0 | 0 | 0 | 0 | 1 | 0 | 2 | 0 | 4 | 0 | 0 | 0 | 0 |   |
| arCOG02594 | COG0784 | T | Rec domain                                           | 0 | 0 | 0 | 0 | 0 | 0 | 0 | 0 | 0 | 0 | 0 | 0 | 4 | 0 | 0 | 0 | 0 |   |
| arCOG02595 | COG0745 | T | REC domains                                          | 0 | 0 | 0 | 0 | 0 | 0 | 0 | 0 | 0 | 2 | 2 | 1 | 1 | 0 | 0 | 0 | 0 |   |
| arCOG02597 | COG0784 | T | Rec domain                                           | 0 | 0 | 0 | 0 | 0 | 0 | 0 | 1 | 0 | 0 | 2 | 0 | 0 | 0 | 0 | 0 | 0 |   |
| arCOG02598 | COG0745 | T | REC domain containing protein                        | 0 | 0 | 0 | 0 | 0 | 0 | 0 | 0 | 0 | 0 | 2 | 1 | 1 | 0 | 0 | 0 | 0 |   |
| arCOG02599 | COG0784 | T | Rec domain                                           | 0 | 0 | 0 | 0 | 0 | 0 | 0 | 2 | 0 | 0 | 0 | 0 | 0 | 0 | 0 | 0 | 0 |   |
| arCOG02600 | COG0784 | T | Signal transduction regulator, contains Rec and HTF  | 0 | 0 | 0 | 0 | 0 | 0 | 0 | 2 | 0 | 0 | 0 | 0 | 0 | 0 | 0 | 0 | 0 |   |
| arCOG02601 | COG0784 | T | Rec domain                                           | 0 | 0 | 0 | 0 | 0 | 0 | 0 | 4 | 0 | 0 | 0 | 0 | 0 | 0 | 0 | 0 | 0 |   |
| arCOG02602 | COG2140 | G | Thermophilic glucose-6-phosphate isomerase or rela   | 0 | 0 | 0 | 0 | 0 | 0 | 1 | 1 | 0 | 0 | 0 | 3 | 1 | 5 | 0 | 4 | 0 |   |
| arCOG02603 | COG2018 | R | Roadblock/LC7 domain                                 | 1 | 0 | 2 | 0 | 0 | 0 | 1 | 0 | 1 | 3 | 2 | 1 | 0 | 1 | 0 | 0 | 0 |   |
| arCOG02605 | COG2018 | R | Roadblock/LC7 domain                                 | 0 | 0 | 0 | 0 | 0 | 0 | 0 | 0 | 0 | 0 | 1 | 1 | 0 | 0 | 0 | 0 | 0 |   |
| arCOG02606 | COG0695 | O | Glutaredoxin                                         | 0 | 0 | 0 | 0 | 0 | 0 | 1 | 1 | 1 | 0 | 2 | 1 | 4 | 0 | 0 | 0 | 0 |   |
| arCOG02607 | COG0695 | O | Glutaredoxin                                         | 0 | 0 | 0 | 0 | 0 | 0 | 0 | 0 | 0 | 0 | 2 | 1 | 4 | 0 | 0 | 0 | 0 |   |
| arCOG02608 | COG0695 | O | Glutaredoxin                                         | 0 | 0 | 0 | 0 | 0 | 0 | 0 | 4 | 0 | 0 | 0 | 0 | 0 | 0 | 0 | 0 | 0 |   |
| arCOG02609 | COG0695 | O | Glutaredoxin                                         | 0 | 0 | 0 | 0 | 0 | 0 | 0 | 4 | 0 | 0 | 0 | 0 | 0 | 0 | 0 | 0 | 0 |   |
| arCOG02610 | COG1354 | L | RecS/SeqA/Sec1-like protein (kleisin family)         | 0 | 0 | 0 | 0 | 0 | 1 | 1 | 4 | 0 | 3 | 3 | 1 | 5 | 0 | 4 | 3 | 1 |   |
| arCOG02611 | COG3398 | S | Predicted transcriptional regulator, contain two HT  | 0 | 0 | 2 | 2 | 0 | 1 | 1 | 4 | 0 | 2 | 3 | 1 | 4 | 0 | 0 | 0 | 0 |   |
| arCOG02613 | COG1386 | K | Chromosome segregation and condensation protein      | 0 | 0 | 0 | 2 | 1 | 1 | 1 | 0 | 0 | 0 | 0 | 1 | 5 | 0 | 4 | 3 | 0 |   |
| arCOG02614 |         | S | Uncharacterized conserved protein                    | 0 | 0 | 0 | 0 | 0 | 0 | 0 | 0 | 0 | 3 | 0 | 0 | 0 | 0 | 0 | 0 | 0 |   |
| arCOG02615 |         | S | Uncharacterized conserved protein                    | 0 | 0 | 0 | 0 | 0 | 0 | 0 | 2 | 0 | 0 | 0 | 0 | 0 | 0 | 0 | 0 | 0 |   |
| arCOG02616 | COG0535 | R | Radical SAM superfamily enzyme                       | 0 | 0 | 3 | 0 | 0 | 0 | 1 | 0 | 0 | 1 | 0 | 1 | 0 | 1 | 0 | 0 | 0 |   |
| arCOG02617 |         | S | Uncharacterized conserved protein                    | 0 | 0 | 0 | 0 | 0 | 0 | 1 | 0 | 0 | 0 | 0 | 0 | 0 | 0 | 0 | 0 | 0 |   |
| arCOG02618 | COG1146 | C | Ferredoxin                                           | 0 | 0 | 3 | 0 | 0 | 0 | 1 | 0 | 0 | 0 | 0 | 0 | 0 | 0 | 0 | 0 | 0 |   |
| arCOG02619 | COG1145 | C | Ferredoxin                                           | 0 | 0 | 0 | 0 | 0 | 0 | 0 | 0 | 0 | 0 | 2 | 0 | 0 | 0 | 0 | 0 | 0 |   |
| arCOG02620 | COG1541 | H | Coenzyme F390 synthetase                             | 0 | 3 | 0 | 0 | 1 | 0 | 1 | 1 | 2 | 2 | 3 | 1 | 5 | 0 | 0 | 0 | 0 |   |
| arCOG02622 | COG1541 | H | Coenzyme F390 synthetase                             | 0 | 0 | 0 | 0 | 0 | 0 | 0 | 0 | 1 | 0 | 0 | 2 | 0 | 4 | 0 | 0 | 0 |   |
| arCOG02623 | COG1541 | H | Coenzyme F390 synthetase                             | 0 | 3 | 0 | 0 | 0 | 0 | 0 | 0 | 0 | 0 | 0 | 0 | 0 | 0 | 0 | 0 | 0 |   |
| arCOG02624 | COG1541 | H | Coenzyme F390 synthetase                             | 0 | 0 | 0 | 0 | 0 | 0 | 1 | 1 | 0 | 0 | 0 | 0 | 0 | 0 | 0 | 0 | 0 |   |
| arCOG02625 | COG1451 | R | Predicted metal-dependent hydrolase                  | 1 | 0 | 0 | 1 | 0 | 0 | 1 | 1 | 2 | 3 | 3 | 1 | 5 | 0 | 4 | 1 | 0 |   |
| arCOG02626 | COG0732 | V | Restriction endonuclease S subunit                   | 1 | 0 | 0 | 1 | 0 | 0 | 1 | 1 | 2 | 2 | 3 | 1 | 3 | 0 | 1 | 2 | 0 |   |
| arCOG02627 | COG0732 | V | Restriction endonuclease S subunit                   | 0 | 0 | 0 | 0 | 0 | 0 | 0 | 0 | 0 | 0 | 0 | 1 | 4 | 0 | 0 | 0 | 0 |   |
| arCOG02628 | COG0732 | V | Restriction endonuclease S subunit                   | 0 | 0 | 0 | 0 | 0 | 0 | 0 | 0 | 0 | 1 | 0 | 0 | 3 | 0 | 0 | 0 | 0 |   |
| arCOG02629 | COG0732 | V | Restriction endonuclease S subunit                   | 0 | 0 | 0 | 0 | 0 | 0 | 0 | 0 | 1 | 0 | 0 | 0 | 1 | 0 | 0 | 0 | 0 |   |
| arCOG02630 | COG0732 | V | Restriction endonuclease S subunit                   | 0 | 0 | 0 | 0 | 0 | 0 | 0 | 0 | 0 | 0 | 0 | 0 | 0 | 0 | 0 | 0 | 0 |   |
| arCOG02631 | COG0732 | V | Type I restriction modification DNA specificity dom  | 0 | 0 | 0 | 0 | 0 | 0 | 0 | 0 | 1 | 0 | 0 | 0 | 0 | 0 | 0 | 0 | 0 |   |
| arCOG02632 | COG0286 | V | Type I restriction-modification system methyltransf  | 1 | 0 | 1 | 1 | 0 | 1 | 1 | 1 | 2 | 2 | 2 | 1 | 5 | 0 | 1 | 1 | 0 |   |
| arCOG02633 | COG1002 | V | Type II restriction enzyme, methylase subunit        | 0 | 0 | 0 | 0 | 0 | 0 | 0 | 1 | 0 | 0 | 0 | 1 | 0 | 0 | 1 | 0 | 0 |   |
| arCOG02634 | COG1002 | V | Type II restriction enzyme, methylase subunit        | 0 | 0 | 0 | 0 | 0 | 0 | 0 | 0 | 0 | 0 | 1 | 0 | 2 | 0 | 0 | 0 | 0 |   |
| arCOG02635 | COG1002 | V | Type II restriction enzyme, methylase subunit        | 0 | 0 | 0 | 0 | 1 | 0 | 0 | 3 | 0 | 1 | 1 | 1 | 2 | 0 | 1 | 2 | 0 |   |
| arCOG02636 | COG0827 | L | Adenine-specific DNA methylase                       | 0 | 0 | 0 | 0 | 0 | 0 | 1 | 0 | 2 | 0 | 0 | 0 | 0 | 0 | 0 | 0 | 0 |   |
| arCOG02638 | COG0657 | I | Esterase/lipase                                      | 0 | 3 | 2 | 1 | 0 | 0 | 1 | 2 | 0 | 0 | 0 | 1 | 1 | 0 | 0 | 2 | 0 |   |
| arCOG02639 | COG5561 | S | Predicted metal-binding protein                      | 0 | 0 | 0 | 0 | 0 | 0 | 1 | 0 | 0 | 2 | 2 | 0 | 4 | 0 | 0 | 0 | 0 |   |
| arCOG02640 | COG1392 | P | Phosphate transport regulator (distant homolog of Pi | 1 | 3 | 0 | 2 | 1 | 0 | 1 | 0 | 1 | 1 | 3 | 1 | 3 | 0 | 4 | 0 | 0 |   |
| arCOG02641 | COG1392 | P | Phosphate transport regulator (distant homolog of Pi | 2 | 3 | 5 | 0 | 0 | 0 | 0 | 0 | 0 | 0 | 0 | 0 | 0 | 0 | 0 | 3 | 0 |   |
| arCOG02642 | COG0628 | R | Predicted permease, member of the PurR regulon       | 0 | 0 | 0 | 0 | 0 | 0 | 1 | 4 | 1 | 3 | 3 | 1 | 5 | 0 | 4 | 0 | 1 |   |
| arCOG02643 | COG1309 | K | Transcriptional regulator, TetR/AcrR family          | 0 | 0 | 0 | 0 | 0 | 0 | 1 | 1 | 1 | 2 | 3 | 1 | 2 | 0 | 0 | 0 | 0 |   |
| arCOG02644 | COG1309 | K | Transcriptional regulator, TetR/AcrR family          | 0 | 0 | 0 | 0 | 0 | 0 | 1 | 1 | 1 | 2 | 3 | 1 | 2 | 0 | 0 | 0 | 0 |   |
| arCOG02645 | COG1309 | K | Transcriptional regulator, TetR/AcrR family          | 0 | 0 | 0 | 0 | 0 | 0 | 0 | 0 | 0 | 0 | 1 | 0 | 1 | 3 | 0 | 0 | 0 |   |
| arCOG02646 | COG1309 | K | Transcriptional regulator, TetR/AcrR family          | 0 | 0 | 0 | 0 | 0 | 0 | 0 | 2 | 1 | 0 | 0 | 0 | 3 | 0 | 0 | 0 | 0 |   |
| arCOG02647 | COG1309 | K | Transcriptional regulator, TetR/AcrR family          | 0 | 3 | 0 | 0 | 0 | 0 | 0 | 1 | 0 | 0 | 2 | 1 | 2 | 0 | 0 | 0 | 0 |   |
| arCOG02648 | COG1309 | K | Transcriptional regulator, TetR/AcrR family          | 0 | 0 | 0 | 0 | 0 | 0 | 0 | 1 | 1 | 0 | 0 | 1 | 3 | 0 | 0 | 0 | 0 |   |
| arCOG02649 | COG1309 | K | Transcriptional regulator, TetR/AcrR family          | 0 | 0 | 0 | 0 | 0 | 0 | 0 | 0 | 0 | 0 | 0 | 1 | 1 | 0 | 1 | 1 | 0 |   |
| arCOG02650 | COG1035 | C | Coenzyme F420-reducing hydrogenase, beta subunit     | 0 | 0 | 0 | 0 | 1 | 0 | 0 | 1 | 1 | 2 | 3 | 3 | 1 | 5 | 0 | 0 | 0 |   |
| arCOG02651 | COG1035 | C | Coenzyme F420-reducing hydrogenase, beta subunit     | 0 | 0 | 0 | 0 | 1 | 0 | 0 | 0 | 2 | 3 | 3 | 1 | 3 | 1 | 0 | 0 | 0 |   |
| arCOG02652 | COG1035 | C | Coenzyme F420-reducing hydrogenase, beta subunit     | 0 | 0 | 0 | 0 | 0 | 0 | 0 | 0 | 1 | 0 | 1 | 1 | 1 | 0 | 0 | 0 | 0 |   |
| arCOG02653 | COG1035 | C | Coenzyme F420-reducing hydrogenase, beta subunit     | 0 | 0 | 0 | 0 | 0 | 0 | 0 | 0 | 2 | 3 | 3 | 1 | 1 | 1 | 0 | 0 | 0 |   |
| arCOG02654 | COG3337 | V | CRISPR system related protein                        | 0 | 0 | 0 | 0 | 0 | 0 | 1 | 0 | 0 | 0 | 0 | 0 | 1 | 0 | 1 | 0 | 0 |   |
| arCOG02655 | COG3337 | V | CRISPR system related protein                        | 0 | 2 | 2 | 0 | 0 | 0 | 0 | 0 | 0 | 0 | 0 | 0 | 0 | 0 | 0 | 0 | 0 |   |
| arCOG02656 | COG3337 | V | CRISPR system related protein                        | 1 | 1 | 0 | 0 | 0 | 0 | 0 | 0 | 0 | 0 | 0 | 0 | 0 | 0 | 0 | 0 | 0 |   |
| arCOG02657 | COG1336 | V | CRISPR system related protein, RAMP superfamily      | 1 | 2 | 3 | 0 | 0 | 0 | 1 | 1 | 0 | 1 | 0 | 0 | 0 | 3 | 1 | 1 | 0 |   |
| arCOG02658 | COG1337 | V | CRISPR system related protein, RAMP superfamily      | 1 | 3 | 3 | 0 | 1 | 0 | 0 | 0 | 0 | 1 | 1 | 1 | 0 | 1 | 1 | 2 | 0 |   |
| arCOG02659 | COG1337 | V | CRISPR system related protein, RAMP superfamily      | 0 | 3 | 1 | 0 | 1 | 0 | 0 | 0 | 0 | 0 | 0 | 0 | 0 | 0 | 0 | 0 | 0 |   |
| arCOG02660 | COG1337 | V | CRISPR system related protein, RAMP superfamily      | 0 | 3 | 1 | 0 | 1 | 0 | 0 | 0 | 0 | 0 | 0 | 0 | 0 | 0 | 0 | 0 | 0 |   |
| arCOG02661 | COG1604 | V | CRISPR system related protein, RAMP superfamily      | 1 | 2 | 3 | 0 | 0 | 1 | 1 | 0 | 0 | 0 | 0 | 0 | 1 | 1 | 1 | 0 | 0 |   |
| arCOG02662 | COG1604 | V | CRISPR system related protein, RAMP superfamily      | 0 | 0 | 0 | 0 | 0 | 0 | 0 | 0 | 0 | 0 | 0 | 0 | 2 | 0 | 0 | 0 | 0 |   |
| arCOG02663 | COG1769 | V | CRISPR system related protein, RAMP superfamily      | 0 | 0 | 0 | 0 | 0 | 0 | 0 | 0 | 0 | 0 | 0 | 0 | 0 | 0 | 0 | 0 | 0 |   |
| arCOG02664 | COG1517 | V | CRISPR system related protein                        | 0 | 0 | 2 | 0 | 0 | 0 | 0 | 0 | 0 | 0 | 0 | 0 | 0 | 0 | 0 | 0 | 0 |   |
| arCOG02665 | COG1769 | V | CRISPR system related protein, RAMP superfamily      | 1 | 2 | 3 | 0 | 0 | 1 | 0 | 0 | 0 | 0 | 0 | 0 | 0 | 0 | 0 | 0 | 0 |   |
| arCOG02666 | COG1353 | V | Predicted CRISPR-associated polymerase               | 1 | 2 | 3 | 0 | 0 | 1 | 1 | 0 | 0 | 0 | 0 | 0 | 1 | 1 | 1 | 0 | 0 |   |
| arCOG02667 | COG1353 | V | Predicted CRISPR-associated polymerase               | 1 | 0 | 1 | 0 | 0 | 0 | 0 | 0 | 1 | 1 | 0 | 0 | 1 | 1 | 1 | 2 | 0 |   |
| arCOG02668 | COG1353 | V | Predicted CRISPR-associated polymerase               | 0 | 3 | 2 | 0 | 1 | 0 | 0 | 0 | 0 | 0 | 1 | 0 | 0 | 0 | 0 | 0 | 0 |   |
|            |         |   |                                                      |   |   |   |   |   |   |   |   |   |   |   |   |   |   |   |   |   |   |

|            |         |   |                                                    |   |     |   |   |   |   |   |   |   |   |   |   |   |   |   |   |   |
|------------|---------|---|----------------------------------------------------|---|-----|---|---|---|---|---|---|---|---|---|---|---|---|---|---|---|
| arCOG02715 | COG4071 | S | Uncharacterized protein conserved in archaea       | 0 | 0   | 0 | 0 | 0 | 0 | 0 | 0 | 2 | 3 | 0 | 0 | 0 | 1 | 0 | 0 | 0 |
| arCOG02716 |         | S | Uncharacterized conserved protein                  | 0 | 0   | 0 | 0 | 0 | 0 | 1 | 0 | 0 | 0 | 0 | 0 | 4 | 0 | 0 | 0 | 0 |
| arCOG02717 | COG2034 | S | Predicted membrane protein                         | 0 | 0   | 0 | 0 | 0 | 0 | 1 | 0 | 1 | 1 | 0 | 0 | 3 | 1 | 4 | 2 | 0 |
| arCOG02718 | COG2034 | S | Predicted membrane protein                         | 2 | 2   | 2 | 0 | 0 | 0 | 0 | 0 | 0 | 0 | 0 | 0 | 4 | 0 | 0 | 1 | 0 |
| arCOG02719 | COG2034 | S | Predicted membrane protein                         | 0 | 3   | 0 | 0 | 0 | 0 | 0 | 0 | 0 | 0 | 0 | 0 | 0 | 0 | 0 | 0 | 0 |
| arCOG02720 | COG1271 | C | Cytochrome bd-type quinol oxidase, subunit 1       | 1 | 0   | 3 | 0 | 0 | 1 | 1 | 0 | 0 | 0 | 0 | 0 | 0 | 0 | 0 | 0 | 0 |
| arCOG02721 | COG1271 | C | Cytochrome bd-type quinol oxidase, subunit 1       | 1 | 0   | 3 | 0 | 0 | 1 | 1 | 1 | 0 | 0 | 0 | 0 | 2 | 0 | 0 | 3 | 0 |
| arCOG02722 | COG2170 | H | Glutamate-cysteine ligase family 2(GCS2)           | 0 | 0   | 0 | 0 | 0 | 0 | 0 | 4 | 0 | 0 | 0 | 0 | 0 | 0 | 0 | 0 | 0 |
| arCOG02723 | COG2170 | S | Glutamate-cysteine ligase family 2                 | 0 | 0   | 0 | 0 | 0 | 0 | 1 | 1 | 0 | 2 | 0 | 0 | 1 | 0 | 0 | 0 | 0 |
| arCOG02724 | COG0350 | L | Methylated DNA-protein cysteine methyltransferase  | 3 | 3   | 5 | 2 | 1 | 1 | 1 | 4 | 2 | 3 | 3 | 1 | 5 | 1 | 4 | 3 | 1 |
| arCOG02726 | COG0721 | J | Asp-tRNAAsn/Glu-tRNAIle amidotransferase C su      | 1 | 3   | 0 | 1 | 0 | 0 | 1 | 4 | 0 | 0 | 3 | 1 | 5 | 0 | 0 | 0 | 1 |
| arCOG02727 | COG1673 | S | Uncharacterized protein conserved in archaea       | 0 | 3   | 0 | 0 | 1 | 1 | 1 | 0 | 1 | 2 | 2 | 0 | 0 | 0 | 2 | 0 | 0 |
| arCOG02728 |         | S | Uncharacterized conserved protein                  | 0 | 0   | 1 | 0 | 0 | 0 | 0 | 0 | 0 | 1 | 0 | 0 | 0 | 0 | 0 | 0 | 0 |
| arCOG02729 | COG1673 | S | Uncharacterized protein conserved in archaea       | 0 | 0   | 2 | 0 | 0 | 0 | 0 | 0 | 0 | 0 | 0 | 0 | 0 | 0 | 0 | 0 | 0 |
| arCOG02730 | COG1848 | V | PIN domain containing protein                      | 1 | 3   | 2 | 0 | 0 | 1 | 1 | 0 | 0 | 0 | 0 | 0 | 0 | 0 | 4 | 0 | 0 |
| arCOG02731 | COG1487 | V | PIN domain containing protein                      | 2 | 1   | 0 | 0 | 0 | 1 | 0 | 0 | 0 | 0 | 0 | 0 | 0 | 0 | 0 | 0 | 0 |
| arCOG02732 | COG0457 | R | TPR repeats containing protein                     | 0 | 0   | 0 | 0 | 0 | 0 | 1 | 0 | 0 | 0 | 0 | 1 | 0 | 0 | 4 | 0 | 0 |
| arCOG02733 | COG0457 | R | TPR repeats containing protein                     | 0 | 0   | 0 | 0 | 0 | 0 | 0 | 0 | 0 | 0 | 0 | 0 | 0 | 0 | 4 | 0 | 0 |
| arCOG02734 | COG1433 | S | NiFX family protein                                | 2 | 1   | 5 | 0 | 0 | 1 | 1 | 0 | 1 | 3 | 3 | 1 | 5 | 1 | 4 | 2 | 0 |
| arCOG02736 | COG1433 | S | NiFX family protein                                | 0 | 0   | 0 | 0 | 0 | 1 | 0 | 0 | 2 | 2 | 0 | 0 | 2 | 0 | 0 | 0 | 0 |
| arCOG02737 | COG1433 | S | NiFX family protein                                | 1 | 0   | 2 | 0 | 0 | 0 | 0 | 0 | 0 | 0 | 0 | 0 | 0 | 0 | 3 | 0 | 1 |
| arCOG02738 | COG1433 | S | NiFX family protein                                | 0 | 3   | 0 | 0 | 0 | 0 | 0 | 0 | 0 | 0 | 0 | 0 | 0 | 0 | 0 | 3 | 0 |
| arCOG02739 | COG1433 | S | NiFX family protein                                | 0 | 2   | 1 | 0 | 0 | 0 | 0 | 0 | 0 | 0 | 0 | 0 | 0 | 0 | 0 | 0 | 0 |
| arCOG02740 | COG1600 | C | Uncharacterized Fe-S protein                       | 0 | 0   | 0 | 0 | 0 | 1 | 1 | 0 | 2 | 2 | 3 | 1 | 4 | 0 | 2 | 0 | 0 |
| arCOG02741 | COG0422 | H | Thiamine biosynthesis protein ThiC                 | 1 | 3   | 2 | 2 | 0 | 0 | 1 | 3 | 2 | 3 | 3 | 1 | 5 | 1 | 3 | 0 | 0 |
| arCOG02742 | COG1721 | R | Uncharacterized conserved protein, DUF58 family, c | 2 | 0   | 2 | 0 | 1 | 0 | 1 | 4 | 0 | 0 | 0 | 0 | 0 | 0 | 4 | 2 | 1 |
| arCOG02743 | COG1721 | R | Uncharacterized conserved protein, DUF58 family, c | 0 | 0   | 0 | 0 | 0 | 0 | 0 | 0 | 2 | 0 | 0 | 0 | 0 | 0 | 3 | 0 | 0 |
| arCOG02744 | COG1721 | R | Uncharacterized conserved protein, DUF58 family, c | 0 | 0   | 1 | 0 | 0 | 0 | 0 | 2 | 0 | 0 | 0 | 0 | 0 | 0 | 0 | 0 | 0 |
| arCOG02745 | COG1721 | R | Uncharacterized conserved protein, DUF58 family, c | 1 | 0   | 0 | 2 | 0 | 0 | 0 | 2 | 0 | 0 | 0 | 2 | 1 | 5 | 0 | 0 | 0 |
| arCOG02746 | COG1721 | R | Uncharacterized conserved protein, DUF58 family, c | 0 | 0   | 1 | 0 | 0 | 0 | 0 | 0 | 0 | 0 | 0 | 0 | 3 | 0 | 0 | 0 | 0 |
| arCOG02747 | COG1721 | R | Uncharacterized conserved protein, DUF58 family, c | 2 | 0   | 0 | 0 | 0 | 0 | 0 | 2 | 0 | 0 | 0 | 3 | 0 | 0 | 0 | 0 | 0 |
| arCOG02748 | COG1721 | R | Uncharacterized conserved protein, DUF58 family, c | 0 | 0   | 2 | 0 | 0 | 0 | 0 | 0 | 0 | 0 | 0 | 0 | 0 | 0 | 0 | 0 | 0 |
| arCOG02749 | COG1378 | K | Predicted transcriptional regulator                | 1 | 0   | 1 | 0 | 0 | 0 | 0 | 4 | 0 | 0 | 0 | 0 | 0 | 0 | 0 | 1 | 0 |
| arCOG02750 |         | K | Predicted transcriptional regulator, HTH           | 0 | 0   | 0 | 0 | 0 | 0 | 0 | 3 | 0 | 0 | 0 | 0 | 0 | 0 | 0 | 0 | 0 |
| arCOG02751 | COG3039 | L | Transposase, IS5 family                            | 0 | 0   | 0 | 0 | 0 | 0 | 0 | 4 | 0 | 0 | 0 | 0 | 0 | 0 | 0 | 0 | 0 |
| arCOG02752 | COG3039 | L | Transposase, IS5 family                            | 0 | 0   | 0 | 0 | 0 | 0 | 0 | 0 | 0 | 0 | 0 | 0 | 3 | 0 | 0 | 0 | 0 |
| arCOG02753 | COG3039 | L | Transposase, IS5 family                            | 0 | 0   | 0 | 0 | 0 | 0 | 0 | 3 | 0 | 0 | 0 | 0 | 0 | 0 | 0 | 0 | 0 |
| arCOG02754 | COG3039 | L | Transposase, IS5 family                            | 0 | 1   | 0 | 0 | 1 | 0 | 0 | 0 | 0 | 0 | 0 | 0 | 1 | 0 | 0 | 1 | 0 |
| arCOG02755 | COG3039 | L | Transposase, IS5 family                            | 0 | 0   | 0 | 0 | 0 | 0 | 0 | 0 | 0 | 0 | 0 | 0 | 3 | 0 | 0 | 0 | 0 |
| arCOG02756 | COG4190 | K | Predicted transcriptional regulator                | 0 | 0   | 0 | 0 | 0 | 0 | 0 | 4 | 0 | 0 | 0 | 0 | 0 | 0 | 0 | 0 | 0 |
| arCOG02757 | COG3649 | V | CRISPR system related protein                      | 0 | 0   | 0 | 0 | 0 | 0 | 0 | 1 | 1 | 1 | 1 | 1 | 3 | 0 | 0 | 0 | 0 |
| arCOG02758 | COG1688 | V | CRISPR system related protein, RAMP superfamily    | 0 | 0   | 0 | 0 | 0 | 0 | 0 | 1 | 2 | 1 | 0 | 0 | 3 | 0 | 1 | 0 | 1 |
| arCOG02759 | COG1943 | L | Transposase                                        | 0 | 2   | 0 | 0 | 0 | 0 | 0 | 4 | 0 | 0 | 0 | 0 | 3 | 0 | 1 | 2 | 0 |
| arCOG02761 | COG3439 | S | Uncharacterized conserved protein                  | 0 | 0   | 0 | 0 | 0 | 0 | 0 | 3 | 0 | 0 | 0 | 0 | 1 | 0 | 1 | 3 | 0 |
| arCOG02762 | COG3439 | S | Uncharacterized conserved protein                  | 0 | 2   | 0 | 0 | 0 | 0 | 0 | 0 | 0 | 0 | 0 | 0 | 0 | 0 | 0 | 2 | 0 |
| arCOG02763 | COG2217 | P | Heavy-metal-associated domain (HMA)                | 1 | 1   | 0 | 0 | 0 | 0 | 0 | 5 | 1 | 0 | 0 | 3 | 1 | 5 | 0 | 2 | 0 |
| arCOG02764 | COG2608 | P | Copper-ion-binding protein                         | 1 | 1   | 0 | 0 | 0 | 0 | 1 | 3 | 0 | 2 | 0 | 1 | 4 | 0 | 1 | 2 | 0 |
| arCOG02765 | COG2608 | P | Copper-ion-binding protein                         | 0 | 0   | 0 | 0 | 0 | 0 | 0 | 0 | 0 | 0 | 0 | 0 | 3 | 0 | 0 | 0 | 0 |
| arCOG02766 | COG1266 | R | Metal-dependent membrane protease, CAAX family     | 0 | 0   | 0 | 0 | 1 | 0 | 0 | 4 | 0 | 0 | 0 | 0 | 0 | 0 | 0 | 0 | 0 |
| arCOG02767 | COG1266 | R | Metal-dependent membrane protease, CAAX family     | 0 | 0   | 0 | 0 | 0 | 0 | 0 | 2 | 0 | 0 | 0 | 0 | 0 | 0 | 0 | 0 | 0 |
| arCOG02768 | COG1266 | R | Metal-dependent membrane protease, CAAX family     | 1 | 0   | 3 | 0 | 0 | 1 | 0 | 1 | 1 | 1 | 2 | 1 | 3 | 0 | 0 | 0 | 0 |
| arCOG02769 | COG1266 | R | Metal-dependent membrane protease, CAAX family     | 0 | 0   | 1 | 0 | 0 | 0 | 0 | 2 | 0 | 0 | 0 | 1 | 4 | 1 | 1 | 0 | 0 |
| arCOG02770 | COG1266 | R | Metal-dependent membrane protease, CAAX family     | 0 | 0   | 0 | 0 | 0 | 0 | 0 | 0 | 3 | 0 | 0 | 0 | 0 | 0 | 0 | 0 | 0 |
| arCOG02771 |         | S | Uncharacterized conserved protein                  | 0 | 0   | 0 | 0 | 0 | 0 | 0 | 3 | 0 | 0 | 0 | 0 | 0 | 0 | 0 | 0 | 0 |
| arCOG02772 | COG0348 | C | Polyferredoxin                                     | 1 | 1   | 1 | 0 | 0 | 0 | 1 | 0 | 0 | 3 | 3 | 0 | 4 | 1 | 0 | 0 | 0 |
| arCOG02773 |         | K | HTH-domain containing transcriptional regulator    | 0 | 0   | 0 | 0 | 0 | 0 | 0 | 4 | 0 | 0 | 0 | 0 | 0 | 0 | 0 | 0 | 0 |
| arCOG02774 |         | S | Uncharacterized conserved protein                  | 0 | 0   | 0 | 0 | 0 | 0 | 0 | 3 | 0 | 0 | 0 | 0 | 0 | 0 | 0 | 0 | 0 |
| arCOG02775 | COG0640 | K | Transcriptional regulator containing HTH domain, A | 0 | 0   | 0 | 0 | 0 | 0 | 0 | 3 | 0 | 0 | 0 | 0 | 0 | 0 | 0 | 0 | 0 |
| arCOG02776 | COG0640 | K | Transcriptional regulator containing HTH domain, A | 0 | 0   | 0 | 0 | 0 | 0 | 0 | 3 | 0 | 0 | 0 | 0 | 0 | 0 | 0 | 0 | 0 |
| arCOG02777 | COG1715 | V | Restriction endonuclease                           | 0 | 0   | 0 | 0 | 0 | 0 | 0 | 4 | 0 | 1 | 1 | 0 | 1 | 0 | 0 | 0 | 0 |
| arCOG02780 |         | V | Endonuclease, HJR/Mnr/RecB family                  | 0 | 0   | 0 | 0 | 0 | 0 | 0 | 0 | 0 | 0 | 3 | 1 | 4 | 0 | 0 | 0 | 0 |
| arCOG02781 | COG1715 | V | Endonuclease, HJR/Mnr/RecB family                  | 0 | 0   | 0 | 0 | 0 | 0 | 0 | 1 | 0 | 0 | 2 | 0 | 3 | 0 | 0 | 0 | 0 |
| arCOG02782 | COG1787 | V | Endonuclease, HJR/Mnr/RecB family                  | 0 | 0   | 0 | 0 | 0 | 0 | 0 | 1 | 0 | 0 | 0 | 0 | 2 | 0 | 0 | 0 | 0 |
| arCOG02783 | COG2135 | S | Uncharacterized conserved protein                  | 0 | 0   | 0 | 0 | 0 | 0 | 0 | 2 | 0 | 0 | 1 | 0 | 0 | 0 | 0 | 0 | 0 |
| arCOG02784 | COG2135 | S | Uncharacterized conserved protein                  | 0 | 0   | 0 | 0 | 0 | 0 | 0 | 0 | 0 | 0 | 0 | 0 | 0 | 0 | 0 | 0 | 0 |
| arCOG02785 | COG3119 | P | Arylsulfatase A or related enzyme                  | 0 | 0   | 1 | 1 | 0 | 0 | 0 | 3 | 0 | 0 | 1 | 0 | 0 | 0 | 1 | 0 | 0 |
| arCOG02787 | COG3119 | P | Arylsulfatase A or related enzyme                  | 0 | 0   | 1 | 0 | 0 | 0 | 0 | 3 | 0 | 0 | 0 | 0 | 0 | 0 | 0 | 0 | 0 |
| arCOG02788 | COG3119 | P | Arylsulfatase A or related enzyme                  | 0 | 0   | 0 | 0 | 0 | 0 | 0 | 3 | 0 | 0 | 0 | 0 | 0 | 0 | 0 | 0 | 0 |
| arCOG02789 | COG3119 | P | Arylsulfatase A or related enzyme                  | 0 | 0   | 0 | 0 | 0 | 0 | 0 | 2 | 0 | 0 | 0 | 0 | 0 | 0 | 0 | 0 | 0 |
| arCOG02790 | COG3119 | P | Arylsulfatase A or related enzyme                  | 0 | 0   | 0 | 0 | 0 | 0 | 0 | 3 | 0 | 0 | 0 | 0 | 0 | 0 | 0 | 0 | 0 |
| arCOG02791 | COG3119 | P | Arylsulfatase A or related enzyme                  | 0 | 0   | 0 | 0 | 0 | 0 | 0 | 3 | 0 | 0 | 0 | 0 | 0 | 0 | 0 | 0 | 0 |
| arCOG02792 | COG0477 | G | permease of the major facilitator superfamily      | 0 | 3   | 4 | 0 | 0 | 0 | 0 | 0 | 0 | 0 | 0 | 0 | 0 | 0 | 0 | 3 | 0 |
| arCOG02793 | COG0477 | G | permease of the major facilitator superfamily      | 0 | 0   | 1 | 0 | 0 | 0 | 0 | 0 | 0 | 0 | 0 | 0 | 0 | 0 | 0 | 3 | 0 |
| arCOG02794 | COG0477 | G | permease of the major facilitator superfamily      | 0 | 1   | 1 | 0 | 0 | 0 | 0 | 0 | 0 | 0 | 0 | 0 | 0 | 0 | 0 | 0 | 0 |
| arCOG02795 | COG1510 | K | Predicted transcriptional regulator                | 0 | 0   | 1 | 0 | 0 | 0 | 0 | 1 | 0 | 1 | 0 | 1 | 1 | 0 | 4 | 0 | 0 |
| arCOG02796 | COG2133 | G | Glucose/sorbitol dehydrogenase                     | 0 | 0   | 1 | 2 | 1 | 0 | 0 | 3 | 0 | 0 | 1 | 1 | 2 | 0 | 0 | 0 | 0 |
| arCOG02797 | COG4746 | S | Uncharacterized protein conserved in archaea       | 0 | 0   | 0 | 0 | 0 | 0 | 0 | 3 | 0 | 2 | 1 | 3 | 0 | 0 | 0 | 0 | 0 |
| arCOG02798 | COG1414 | K | Transcriptional regulator (cIIR family)            | 0 | 0   | 0 | 0 | 0 | 0 | 0 | 3 | 0 | 0 | 0 | 0 | 0 | 0 | 0 | 0 | 0 |
| arCOG02799 | COG1414 | K | Transcriptional regulator (cIIR family)            | 0 | 0   | 0 | 0 | 0 | 0 | 0 | 2 | 0 | 0 | 0 | 0 | 0 | 0 | 0 | 0 | 0 |
| arCOG02800 | COG1414 | K | Transcriptional regulator (cIIR family)            | 0 | 0   | 0 | 0 | 0 | 0 | 0 | 2 | 0 | 0 | 0 | 0 | 0 | 0 | 0 | 0 | 0 |
| arCOG02801 |         | S | Uncharacterized conserved protein                  | 0 | 0   | 0 | 0 | 0 | 0 | 0 | 3 | 0 | 0 | 0 | 0 | 0 | 0 | 0 | 0 | 0 |
| arCOG02802 |         | S | Uncharacterized conserved protein                  | 0 | 0   | 0 | 0 | 0 | 0 | 0 | 2 | 0 | 0 | 0 | 0 | 0 | 0 | 0 | 0 | 0 |
| arCOG02803 |         | S | Uncharacterized conserved protein                  | 0 | 0   | 0 | 0 | 0 | 0 | 0 | 3 | 0 | 0 | 0 | 0 | 0 | 0 | 0 | 0 | 0 |
| arCOG02804 |         | S | Uncharacterized conserved protein                  | 0 | 0</ |   |   |   |   |   |   |   |   |   |   |   |   |   |   |   |

|            |         |   |                                                       |   |   |   |   |   |   |   |   |   |   |   |   |   |     |   |   |   |
|------------|---------|---|-------------------------------------------------------|---|---|---|---|---|---|---|---|---|---|---|---|---|-----|---|---|---|
| arCOG02849 | COG0003 | P | Oxyanion-translocating ATPase                         | 3 | 0 | 3 | 0 | 1 | 1 | 0 | 4 | 2 | 3 | 0 | 0 | 0 | 1   | 2 | 3 | 0 |
| arCOG02850 | COG0003 | P | Oxyanion-translocating ATPase                         | 2 | 0 | 0 | 0 | 0 | 0 | 0 | 0 | 0 | 0 | 0 | 0 | 0 | 0   | 0 | 0 | 0 |
| arCOG02851 | COG2146 | P | Ferredoxin subunit of nitrite reductase or ring-hydro | 0 | 0 | 0 | 0 | 0 | 0 | 0 | 4 | 0 | 0 | 0 | 0 | 0 | 0   | 0 | 0 | 0 |
| arCOG02852 | COG2146 | P | Ferredoxin subunit of nitrite reductase or ring-hydro | 0 | 3 | 1 | 2 | 1 | 0 | 0 | 1 | 0 | 0 | 0 | 1 | 2 | 0   | 0 | 2 | 0 |
| arCOG02853 | COG2146 | P | Ferredoxin subunit of nitrite reductase or ring-hydro | 0 | 3 | 2 | 1 | 1 | 0 | 0 | 0 | 0 | 0 | 0 | 1 | 0 | 0   | 0 | 0 | 0 |
| arCOG02854 | COG2146 | P | Ferredoxin subunit of nitrite reductase or ring-hydro | 0 | 3 | 2 | 2 | 0 | 0 | 0 | 0 | 0 | 0 | 0 | 1 | 0 | 0   | 0 | 3 | 0 |
| arCOG02855 | COG2146 | P | Ferredoxin subunit of nitrite reductase or ring-hydro | 0 | 3 | 0 | 0 | 0 | 0 | 0 | 0 | 0 | 0 | 3 | 1 | 0 | 0   | 0 | 0 | 0 |
| arCOG02856 |         | S | Uncharacterized conserved protein                     | 0 | 0 | 0 | 0 | 0 | 0 | 0 | 3 | 0 | 0 | 0 | 0 | 0 | 0   | 0 | 0 | 0 |
| arCOG02857 |         | S | Uncharacterized conserved protein                     | 0 | 0 | 0 | 0 | 0 | 0 | 2 | 0 | 0 | 0 | 0 | 0 | 0 | 0   | 0 | 0 | 0 |
| arCOG02858 |         | S | Uncharacterized conserved protein                     | 0 | 0 | 0 | 0 | 0 | 0 | 3 | 0 | 0 | 0 | 0 | 0 | 0 | 0   | 0 | 0 | 0 |
| arCOG02859 |         | S | Uncharacterized conserved protein                     | 0 | 0 | 0 | 0 | 0 | 0 | 2 | 0 | 0 | 0 | 0 | 0 | 0 | 0   | 0 | 0 | 0 |
| arCOG02860 | COG0288 | P | Carbonic anhydrase                                    | 0 | 3 | 0 | 0 | 0 | 0 | 2 | 3 | 2 | 3 | 0 | 1 | 0 | 0   | 0 | 1 | 0 |
| arCOG02861 | COG2259 | S | Predicted membrane protein, DxD family                | 0 | 0 | 0 | 0 | 0 | 0 | 3 | 0 | 0 | 0 | 0 | 0 | 0 | 0   | 0 | 0 | 0 |
| arCOG02862 | COG2259 | S | Predicted membrane protein, DxD family                | 0 | 2 | 0 | 0 | 0 | 0 | 0 | 0 | 0 | 0 | 0 | 0 | 0 | 0   | 0 | 1 | 0 |
| arCOG02863 | COG2259 | S | Predicted membrane protein, DxD family                | 0 | 2 | 0 | 0 | 0 | 0 | 0 | 0 | 0 | 0 | 0 | 0 | 0 | 0   | 0 | 0 | 0 |
| arCOG02864 | COG2322 | S | Predicted membrane protein                            | 0 | 0 | 0 | 0 | 1 | 0 | 4 | 0 | 0 | 0 | 0 | 0 | 0 | 0   | 0 | 0 | 0 |
| arCOG02865 | COG2322 | S | Predicted membrane protein                            | 0 | 0 | 0 | 0 | 0 | 0 | 4 | 0 | 0 | 0 | 0 | 0 | 0 | 0   | 0 | 0 | 0 |
| arCOG02866 |         | S | Uncharacterized conserved protein                     | 0 | 0 | 0 | 0 | 0 | 0 | 4 | 0 | 0 | 3 | 1 | 0 | 0 | 4   | 0 | 0 | 0 |
| arCOG02867 |         | S | Uncharacterized conserved protein                     | 0 | 0 | 0 | 0 | 0 | 0 | 4 | 0 | 0 | 0 | 0 | 0 | 0 | 0   | 0 | 0 | 0 |
| arCOG02868 | COG1651 | Q | Protein-disulfide isomerase                           | 0 | 0 | 0 | 2 | 0 | 0 | 1 | 4 | 0 | 0 | 0 | 1 | 0 | 0   | 0 | 0 | 0 |
| arCOG02869 | COG2761 | Q | Predicted dithiol-disulfide isomerase involved in pol | 0 | 3 | 0 | 0 | 1 | 0 | 0 | 3 | 0 | 0 | 0 | 0 | 0 | 0   | 0 | 0 | 0 |
| arCOG02870 | COG1651 | Q | Protein-disulfide isomerase                           | 0 | 0 | 3 | 0 | 0 | 0 | 0 | 0 | 0 | 0 | 0 | 0 | 0 | 0   | 0 | 0 | 0 |
| arCOG02871 | COG1651 | O | Protein-disulfide isomerase                           | 0 | 0 | 4 | 0 | 0 | 0 | 0 | 0 | 0 | 0 | 0 | 0 | 0 | 0   | 0 | 0 | 0 |
| arCOG02872 | COG1651 | O | Protein-disulfide isomerase                           | 1 | 0 | 0 | 0 | 0 | 0 | 0 | 0 | 0 | 0 | 0 | 0 | 0 | 0   | 0 | 0 | 0 |
| arCOG02874 |         | S | Uncharacterized conserved protein                     | 0 | 0 | 0 | 0 | 0 | 0 | 4 | 0 | 0 | 0 | 0 | 5 | 0 | 0   | 0 | 0 | 0 |
| arCOG02875 |         | S | Uncharacterized conserved protein                     | 0 | 0 | 0 | 0 | 0 | 0 | 0 | 0 | 0 | 3 | 0 | 0 | 0 | 0   | 0 | 0 | 0 |
| arCOG02876 | COG0726 | G | Predicted xylanase/chitin deacetylase                 | 1 | 0 | 0 | 0 | 0 | 0 | 1 | 0 | 0 | 0 | 0 | 1 | 3 | 1   | 2 | 0 | 0 |
| arCOG02877 | COG0726 | G | Predicted xylanase/chitin deacetylase                 | 2 | 0 | 0 | 0 | 0 | 0 | 0 | 0 | 0 | 0 | 2 | 1 | 3 | 0   | 0 | 1 | 0 |
| arCOG02878 | COG0726 | G | Predicted xylanase/chitin deacetylase                 | 0 | 0 | 1 | 0 | 0 | 0 | 0 | 0 | 0 | 0 | 1 | 0 | 2 | 0   | 0 | 0 | 0 |
| arCOG02879 |         | S | Uncharacterized conserved protein                     | 0 | 0 | 0 | 0 | 0 | 0 | 0 | 0 | 0 | 0 | 0 | 0 | 0 | 0   | 0 | 0 | 0 |
| arCOG02880 |         | S | Uncharacterized conserved protein                     | 0 | 0 | 0 | 0 | 0 | 0 | 0 | 0 | 0 | 3 | 0 | 0 | 0 | 0   | 0 | 0 | 0 |
| arCOG02881 | COG0530 | P | Ca2+/Na+ antiporter                                   | 0 | 3 | 4 | 2 | 0 | 0 | 1 | 4 | 1 | 3 | 1 | 1 | 4 | 1   | 4 | 3 | 1 |
| arCOG02882 | COG1944 | S | Uncharacterized conserved protein                     | 0 | 0 | 0 | 0 | 0 | 0 | 4 | 2 | 3 | 3 | 1 | 5 | 1 | 0   | 0 | 0 | 0 |
| arCOG02883 | COG1944 | S | Uncharacterized conserved protein                     | 0 | 1 | 0 | 0 | 0 | 0 | 0 | 0 | 0 | 0 | 0 | 0 | 0 | 1   | 0 | 0 | 0 |
| arCOG02884 | COG4743 | S | Predicted membrane protein                            | 0 | 0 | 0 | 0 | 0 | 0 | 0 | 2 | 1 | 3 | 1 | 0 | 0 | 3   | 3 | 0 | 0 |
| arCOG02886 | COG4743 | S | Predicted membrane protein                            | 0 | 0 | 0 | 0 | 0 | 0 | 0 | 0 | 0 | 0 | 0 | 2 | 0 | 0   | 0 | 0 | 0 |
| arCOG02887 | COG4743 | S | Predicted membrane protein                            | 0 | 0 | 1 | 0 | 0 | 0 | 0 | 0 | 0 | 0 | 0 | 0 | 0 | 0   | 0 | 0 | 0 |
| arCOG02888 | COG2988 | E | Succinylglutamate desuccinylase                       | 0 | 0 | 0 | 0 | 0 | 0 | 3 | 0 | 0 | 0 | 0 | 0 | 0 | 0   | 0 | 0 | 0 |
| arCOG02889 | COG3608 | R | Predicted deacylase                                   | 0 | 0 | 0 | 0 | 0 | 0 | 0 | 1 | 0 | 0 | 0 | 0 | 0 | 1   | 0 | 0 | 0 |
| arCOG02890 | COG3608 | R | Predicted deacylase                                   | 0 | 0 | 0 | 0 | 0 | 0 | 4 | 0 | 0 | 0 | 0 | 2 | 0 | 0   | 0 | 0 | 0 |
| arCOG02891 | COG2766 | T | Predicted Ser/Thr protein kinase                      | 0 | 0 | 0 | 0 | 0 | 0 | 4 | 0 | 0 | 0 | 0 | 0 | 0 | 0   | 0 | 0 | 0 |
| arCOG02892 | COG2766 | T | Predicted Ser/Thr protein kinase                      | 0 | 0 | 0 | 0 | 0 | 0 | 4 | 0 | 0 | 0 | 0 | 0 | 0 | 0   | 0 | 0 | 0 |
| arCOG02893 |         | S | Uncharacterized conserved protein                     | 0 | 0 | 0 | 0 | 0 | 0 | 3 | 0 | 0 | 0 | 0 | 0 | 0 | 0   | 0 | 0 | 0 |
| arCOG02894 |         | S | Uncharacterized conserved protein                     | 0 | 0 | 0 | 0 | 0 | 0 | 3 | 0 | 0 | 0 | 0 | 0 | 0 | 0   | 0 | 0 | 0 |
| arCOG02895 | COG1193 | L | DNA structure-specific ATPase involved in suppress    | 0 | 0 | 0 | 0 | 0 | 0 | 4 | 2 | 0 | 0 | 0 | 1 | 5 | 0   | 4 | 0 | 0 |
| arCOG02896 | COG0249 | L | Mismatch repair ATPase (MutS family)                  | 0 | 0 | 0 | 0 | 0 | 0 | 4 | 0 | 0 | 0 | 0 | 0 | 0 | 0   | 0 | 1 | 0 |
| arCOG02897 | COG0249 | L | Mismatch repair ATPase (MutS family)                  | 0 | 0 | 0 | 0 | 0 | 0 | 4 | 0 | 0 | 0 | 0 | 0 | 0 | 0   | 0 | 0 | 0 |
| arCOG02898 |         | R | Polyketide cyclase/dehydrase family protein involve   | 0 | 0 | 0 | 0 | 0 | 0 | 4 | 0 | 0 | 0 | 0 | 0 | 0 | 0   | 0 | 0 | 0 |
| arCOG02899 |         | S | Uncharacterized conserved protein                     | 0 | 0 | 0 | 0 | 0 | 0 | 3 | 0 | 0 | 0 | 0 | 0 | 0 | 0   | 0 | 0 | 0 |
| arCOG02900 | COG2304 | R | Uncharacterized protein containing a von Willebran    | 1 | 3 | 1 | 2 | 0 | 0 | 1 | 1 | 0 | 0 | 1 | 0 | 1 | 0   | 0 | 1 | 1 |
| arCOG02902 | COG2304 | R | Uncharacterized protein containing a von Willebran    | 1 | 0 | 0 | 2 | 0 | 1 | 0 | 0 | 0 | 2 | 0 | 5 | 0 | 0   | 0 | 0 | 0 |
| arCOG02903 |         | R | Protein containing Bacterial Ig-like domain and vW    | 0 | 0 | 0 | 0 | 0 | 0 | 1 | 0 | 0 | 2 | 1 | 0 | 0 | 0   | 1 | 0 | 0 |
| arCOG02904 | COG2304 | R | Uncharacterized protein containing a von Willebran    | 0 | 0 | 0 | 0 | 0 | 0 | 0 | 0 | 0 | 0 | 0 | 0 | 0 | 0   | 0 | 0 | 0 |
| arCOG02905 | COG2304 | R | Uncharacterized protein containing a von Willebran    | 0 | 0 | 0 | 0 | 0 | 0 | 2 | 0 | 0 | 0 | 0 | 5 | 0 | 0   | 0 | 0 | 0 |
| arCOG02906 | COG2304 | R | Uncharacterized protein containing a von Willebran    | 0 | 0 | 0 | 0 | 0 | 0 | 0 | 0 | 0 | 0 | 0 | 3 | 0 | 0   | 0 | 0 | 0 |
| arCOG02907 | COG2304 | R | Uncharacterized protein containing a von Willebran    | 0 | 0 | 0 | 0 | 0 | 0 | 2 | 0 | 0 | 0 | 0 | 5 | 0 | 0   | 0 | 0 | 0 |
| arCOG02908 | COG2304 | R | Uncharacterized protein containing a von Willebran    | 0 | 0 | 0 | 0 | 0 | 0 | 0 | 0 | 0 | 0 | 0 | 3 | 0 | 0   | 0 | 0 | 0 |
| arCOG02909 | COG4250 | T | Predicted sensor protein/domain                       | 0 | 0 | 0 | 0 | 0 | 0 | 3 | 0 | 0 | 0 | 0 | 0 | 0 | 0   | 0 | 0 | 0 |
| arCOG02910 | COG4250 | T | Predicted sensor protein/domain                       | 0 | 0 | 0 | 0 | 0 | 0 | 3 | 0 | 0 | 0 | 0 | 0 | 0 | 0   | 0 | 0 | 0 |
| arCOG02911 |         | S | Uncharacterized conserved membrane protein            | 0 | 0 | 0 | 0 | 0 | 0 | 1 | 4 | 0 | 0 | 2 | 1 | 1 | 0   | 0 | 0 | 0 |
| arCOG02912 |         | S | Uncharacterized conserved protein                     | 0 | 0 | 0 | 0 | 0 | 0 | 0 | 0 | 0 | 0 | 2 | 4 | 0 | 0   | 0 | 0 | 0 |
| arCOG02913 |         | S | Uncharacterized conserved protein                     | 0 | 0 | 0 | 0 | 0 | 0 | 0 | 0 | 0 | 0 | 0 | 2 | 0 | 0   | 0 | 0 | 0 |
| arCOG02914 |         | S | Uncharacterized conserved protein                     | 0 | 0 | 0 | 0 | 0 | 0 | 0 | 0 | 0 | 0 | 0 | 3 | 0 | 0   | 0 | 0 | 0 |
| arCOG02915 |         | S | Uncharacterized conserved protein                     | 0 | 0 | 0 | 0 | 0 | 0 | 0 | 0 | 0 | 0 | 0 | 0 | 0 | 0   | 0 | 0 | 0 |
| arCOG02916 |         | S | Uncharacterized conserved protein                     | 0 | 0 | 0 | 0 | 0 | 0 | 1 | 2 | 0 | 0 | 0 | 0 | 0 | 0   | 0 | 0 | 0 |
| arCOG02917 | COG3794 | C | Plastocyanin                                          | 0 | 0 | 0 | 0 | 0 | 0 | 0 | 4 | 0 | 0 | 0 | 0 | 0 | 0   | 0 | 0 | 0 |
| arCOG02918 | COG3794 | C | Plastocyanin                                          | 0 | 0 | 0 | 0 | 0 | 0 | 3 | 0 | 0 | 0 | 0 | 0 | 0 | 0   | 0 | 0 | 0 |
| arCOG02919 | COG3794 | C | Plastocyanin                                          | 0 | 0 | 0 | 0 | 0 | 0 | 2 | 0 | 0 | 0 | 0 | 0 | 0 | 0   | 0 | 0 | 0 |
| arCOG02920 | COG3794 | C | Plastocyanin                                          | 0 | 0 | 0 | 0 | 0 | 0 | 4 | 0 | 0 | 0 | 0 | 0 | 0 | 0   | 0 | 0 | 0 |
| arCOG02921 | COG3794 | C | Plastocyanin                                          | 0 | 0 | 0 | 0 | 0 | 0 | 0 | 0 | 0 | 0 | 0 | 0 | 0 | 0   | 0 | 0 | 0 |
| arCOG02922 | COG4892 | R | Predicted heme/steroid binding protein                | 0 | 0 | 0 | 0 | 0 | 0 | 0 | 1 | 0 | 0 | 0 | 0 | 4 | 0   | 0 | 0 | 0 |
| arCOG02923 | COG4892 | R | Predicted heme/steroid binding protein                | 0 | 0 | 0 | 0 | 0 | 0 | 0 | 0 | 0 | 0 | 0 | 2 | 0 | 0   | 0 | 0 | 0 |
| arCOG02924 |         | S | Uncharacterized conserved protein                     | 0 | 0 | 0 | 0 | 0 | 0 | 0 | 0 | 0 | 0 | 0 | 2 | 0 | 0   | 0 | 0 | 0 |
| arCOG02926 | COG3794 | C | Plastocyanin                                          | 0 | 0 | 0 | 2 | 1 | 0 | 0 | 0 | 0 | 2 | 1 | 1 | 0 | 0   | 0 | 0 | 0 |
| arCOG02929 | COG3794 | C | Plastocyanin                                          | 0 | 0 | 0 | 2 | 0 | 0 | 0 | 0 | 0 | 0 | 0 | 0 | 0 | 0   | 0 | 0 | 0 |
| arCOG02930 | COG3794 | C | Plastocyanin                                          | 0 | 0 | 0 | 0 | 0 | 0 | 0 | 0 | 0 | 0 | 0 | 1 | 2 | 0   | 0 | 0 | 0 |
| arCOG02931 | COG3794 | C | Plastocyanin                                          | 0 | 0 | 0 | 0 | 0 | 0 | 0 | 0 | 0 | 0 | 0 | 0 | 3 | 0   | 0 | 0 | 0 |
| arCOG02932 | COG3794 | C | Plastocyanin                                          | 0 | 0 | 0 | 0 | 0 | 0 | 0 | 0 | 0 | 0 | 0 | 0 | 2 | 0   | 0 | 0 | 0 |
| arCOG02933 | COG3794 | C | Plastocyanin                                          | 0 | 0 | 0 | 0 | 0 | 0 | 0 | 0 | 0 | 0 | 0 | 0 | 3 | 0   | 0 | 0 | 0 |
| arCOG02934 | COG3794 | C | Plastocyanin                                          | 0 | 0 | 0 | 0 | 0 | 0 | 0 | 0 | 0 | 0 | 0 | 0 | 3 | 0   | 0 | 0 | 0 |
| arCOG02935 | COG1741 | R | Prin-related protein                                  | 0 | 0 | 0 | 0 | 0 | 0 | 0 | 0 | 0 | 0 | 0 | 0 | 0 | 0   | 0 | 0 | 0 |
| arCOG02936 | COG1562 | I | Phytene/squalene synthetase                           | 0 | 2 | 0 | 0 | 1 | 0 | 0 | 4 | 1 | 0 | 1 | 0 | 0 | 0   | 0 | 1 | 0 |
| arCOG02937 | COG3407 | I | Mevalonate pyrophosphate decarboxylase                | 0 | 3 | 0 | 0 | 1 | 0 | 0 | 4 | 0 | 0 | 0 | 0 | 0 | 0   | 0 | 3 | 0 |
| arCOG02938 | COG3407 | I | Mevalonate pyrophosphate decarboxylase                | 0 | 0 | 0 | 0 | 0 | 0 | 0 | 0 | 0 | 0 | 0 | 0 | 0 | 0   | 0 | 3 | 0 |
| arCOG02939 | COG2154 | H | Pterin-4a-carbinolamine dehydratase                   | 0 | 3 | 2 | 2 | 1 | 0 | 0 | 4 | 0 | 0 | 1 | 0 | 0 | 0</ |   |   |   |









|            |         |   |                                                      |   |   |   |   |   |   |   |   |   |   |   |   |   |   |   |   |   |   |   |
|------------|---------|---|------------------------------------------------------|---|---|---|---|---|---|---|---|---|---|---|---|---|---|---|---|---|---|---|
| arCOG03534 | COG0500 | Q | SAM-dependent methyltransferase                      | 0 | 0 | 0 | 0 | 0 | 0 | 0 | 0 | 0 | 0 | 0 | 0 | 0 | 2 | 0 | 0 | 0 | 0 |   |
| arCOG03535 |         | S | Uncharacterized conserved protein                    | 0 | 0 | 0 | 0 | 0 | 0 | 0 | 0 | 0 | 0 | 0 | 0 | 0 | 3 | 0 | 0 | 0 | 0 |   |
| arCOG03536 |         | S | Uncharacterized conserved protein                    | 0 | 0 | 0 | 0 | 0 | 0 | 0 | 0 | 0 | 0 | 0 | 0 | 0 | 4 | 0 | 0 | 0 | 0 |   |
| arCOG03537 |         | S | Uncharacterized conserved protein                    | 0 | 0 | 0 | 0 | 0 | 0 | 0 | 0 | 0 | 0 | 0 | 0 | 0 | 4 | 0 | 0 | 0 | 0 |   |
| arCOG03538 |         | S | Uncharacterized conserved protein                    | 0 | 0 | 0 | 0 | 0 | 0 | 0 | 0 | 0 | 0 | 0 | 0 | 0 | 4 | 0 | 0 | 0 | 0 |   |
| arCOG03539 |         | S | Uncharacterized conserved protein                    | 0 | 0 | 0 | 0 | 0 | 0 | 0 | 0 | 0 | 0 | 0 | 0 | 0 | 3 | 0 | 0 | 0 | 0 |   |
| arCOG03540 |         | S | Uncharacterized conserved protein                    | 0 | 0 | 0 | 0 | 0 | 0 | 0 | 0 | 0 | 0 | 0 | 0 | 0 | 3 | 0 | 0 | 0 | 0 |   |
| arCOG03541 | COG1988 | R | Membrane-bound metal-dependent hydrolase             | 0 | 0 | 0 | 0 | 0 | 0 | 0 | 0 | 0 | 0 | 0 | 0 | 0 | 3 | 0 | 0 | 0 | 0 |   |
| arCOG03542 | COG1988 | R | Membrane-bound metal-dependent hydrolase             | 0 | 0 | 0 | 0 | 0 | 0 | 0 | 0 | 0 | 0 | 0 | 0 | 0 | 3 | 0 | 0 | 0 | 0 |   |
| arCOG03543 | COG1988 | R | Membrane-bound metal-dependent hydrolase             | 0 | 0 | 0 | 0 | 0 | 0 | 0 | 0 | 0 | 0 | 0 | 0 | 0 | 3 | 0 | 0 | 0 | 0 |   |
| arCOG03544 | COG5513 | S | Predicted secreted protein                           | 0 | 0 | 0 | 0 | 0 | 0 | 0 | 0 | 0 | 0 | 3 | 1 | 4 | 0 | 0 | 0 | 0 | 0 |   |
| arCOG03545 | COG4880 | R | Secreted protein containing C-terminal beta-propelle | 0 | 0 | 0 | 0 | 0 | 0 | 0 | 0 | 2 | 0 | 0 | 0 | 0 | 0 | 0 | 0 | 0 | 0 |   |
| arCOG03546 | COG5513 | S | Predicted secreted protein                           | 0 | 0 | 0 | 0 | 0 | 0 | 0 | 0 | 0 | 0 | 0 | 0 | 2 | 0 | 0 | 0 | 0 | 0 |   |
| arCOG03547 | COG5513 | S | Predicted secreted protein                           | 0 | 0 | 0 | 0 | 0 | 0 | 0 | 0 | 0 | 0 | 0 | 0 | 4 | 0 | 0 | 0 | 0 | 0 |   |
| arCOG03548 |         | S | Uncharacterized conserved protein                    | 0 | 0 | 0 | 0 | 0 | 0 | 0 | 0 | 0 | 0 | 0 | 0 | 3 | 0 | 0 | 0 | 0 | 0 |   |
| arCOG03549 | COG1572 | S | Uncharacterized conserved protein                    | 0 | 0 | 0 | 0 | 0 | 0 | 0 | 0 | 0 | 0 | 0 | 0 | 3 | 0 | 0 | 0 | 0 | 0 |   |
| arCOG03550 |         | S | Cell surface protein                                 | 0 | 0 | 0 | 0 | 0 | 0 | 0 | 0 | 0 | 0 | 0 | 0 | 3 | 0 | 0 | 0 | 0 | 0 |   |
| arCOG03551 |         | S | Cell surface protein                                 | 0 | 0 | 0 | 0 | 0 | 0 | 0 | 0 | 0 | 0 | 0 | 0 | 3 | 0 | 0 | 0 | 0 | 0 |   |
| arCOG03552 |         | S | Cell surface protein                                 | 0 | 0 | 0 | 0 | 0 | 0 | 0 | 0 | 0 | 0 | 0 | 0 | 2 | 0 | 0 | 0 | 0 | 0 |   |
| arCOG03553 | COG1572 | S | Uncharacterized conserved protein                    | 0 | 0 | 0 | 0 | 0 | 0 | 0 | 0 | 0 | 0 | 0 | 0 | 3 | 0 | 1 | 0 | 0 | 0 |   |
| arCOG03555 | COG3291 | R | PKD repeats containing protein                       | 0 | 0 | 0 | 0 | 0 | 0 | 0 | 0 | 0 | 0 | 0 | 0 | 2 | 0 | 0 | 0 | 0 | 0 |   |
| arCOG03557 |         | S | Cell surface protein                                 | 0 | 0 | 0 | 0 | 0 | 0 | 0 | 0 | 1 | 0 | 0 | 0 | 3 | 0 | 0 | 0 | 0 | 0 |   |
| arCOG03558 | COG4742 | K | Predicted transcriptional regulator                  | 0 | 0 | 0 | 0 | 0 | 0 | 0 | 0 | 0 | 0 | 0 | 0 | 3 | 0 | 0 | 0 | 0 | 0 |   |
| arCOG03559 | COG4742 | K | Predicted transcriptional regulator                  | 0 | 0 | 0 | 0 | 0 | 0 | 0 | 0 | 0 | 0 | 0 | 0 | 3 | 0 | 0 | 0 | 0 | 0 |   |
| arCOG03560 |         | S | Uncharacterized conserved protein                    | 0 | 1 | 0 | 0 | 0 | 0 | 0 | 0 | 0 | 0 | 1 | 1 | 3 | 0 | 0 | 0 | 0 | 0 |   |
| arCOG03561 | COG3391 | S | Uncharacterized conserved protein                    | 0 | 0 | 0 | 2 | 0 | 0 | 0 | 0 | 0 | 0 | 1 | 1 | 2 | 0 | 0 | 0 | 0 | 0 |   |
| arCOG03562 | COG0526 | O | Thiol-disulfide isomerase or thioredoxin             | 0 | 0 | 0 | 2 | 1 | 0 | 0 | 0 | 0 | 0 | 0 | 1 | 0 | 1 | 0 | 0 | 0 | 0 |   |
| arCOG03563 | COG3291 | R | PKD repeats containing protein                       | 0 | 0 | 0 | 0 | 0 | 0 | 0 | 0 | 0 | 0 | 0 | 0 | 2 | 0 | 0 | 0 | 0 | 0 |   |
| arCOG03564 | COG4257 | V | Streptogramin lyase                                  | 0 | 0 | 0 | 2 | 0 | 0 | 0 | 0 | 0 | 0 | 0 | 1 | 0 | 0 | 0 | 0 | 0 | 0 |   |
| arCOG03565 |         | S | Uncharacterized conserved protein                    | 0 | 0 | 0 | 0 | 0 | 0 | 0 | 0 | 0 | 0 | 0 | 0 | 3 | 0 | 0 | 0 | 0 | 0 |   |
| arCOG03566 |         | S | Uncharacterized conserved protein                    | 0 | 0 | 0 | 0 | 0 | 0 | 0 | 0 | 0 | 0 | 0 | 0 | 2 | 0 | 0 | 0 | 0 | 0 |   |
| arCOG03567 | COG2202 | T | PAS domain                                           | 0 | 0 | 0 | 0 | 0 | 0 | 0 | 0 | 0 | 0 | 0 | 2 | 1 | 3 | 0 | 0 | 0 | 0 |   |
| arCOG03569 | COG3920 | T | PAS domain                                           | 0 | 0 | 0 | 0 | 0 | 0 | 0 | 0 | 0 | 0 | 0 | 0 | 3 | 0 | 0 | 0 | 0 | 0 |   |
| arCOG03570 | COG0500 | Q | SAM-dependent methyltransferase                      | 0 | 0 | 0 | 0 | 0 | 0 | 0 | 0 | 1 | 0 | 0 | 0 | 1 | 0 | 0 | 0 | 0 | 0 |   |
| arCOG03571 |         | S | Uncharacterized conserved protein                    | 0 | 0 | 0 | 0 | 0 | 0 | 0 | 0 | 0 | 0 | 2 | 1 | 1 | 0 | 0 | 0 | 0 | 0 |   |
| arCOG03572 |         | S | Uncharacterized conserved protein                    | 0 | 0 | 0 | 0 | 0 | 0 | 0 | 0 | 0 | 0 | 1 | 0 | 1 | 0 | 0 | 0 | 0 | 0 |   |
| arCOG03573 | COG4198 | S | Uncharacterized conserved protein                    | 0 | 0 | 0 | 0 | 0 | 0 | 0 | 0 | 0 | 0 | 3 | 0 | 0 | 0 | 0 | 3 | 0 | 0 |   |
| arCOG03574 | COG4198 | S | Uncharacterized conserved protein                    | 0 | 0 | 0 | 0 | 0 | 0 | 0 | 0 | 0 | 0 | 0 | 0 | 3 | 0 | 0 | 0 | 0 | 0 |   |
| arCOG03575 | COG2326 | S | Uncharacterized conserved protein                    | 0 | 0 | 0 | 0 | 0 | 0 | 0 | 0 | 0 | 0 | 1 | 0 | 3 | 0 | 0 | 0 | 0 | 0 |   |
| arCOG03576 | COG2326 | S | Uncharacterized conserved protein                    | 0 | 0 | 0 | 0 | 0 | 0 | 0 | 0 | 0 | 0 | 0 | 0 | 3 | 0 | 0 | 0 | 0 | 0 |   |
| arCOG03577 |         | S | Uncharacterized conserved protein                    | 0 | 0 | 0 | 0 | 0 | 0 | 0 | 0 | 0 | 0 | 0 | 0 | 4 | 0 | 0 | 0 | 0 | 0 |   |
| arCOG03578 |         | S | Uncharacterized conserved protein                    | 0 | 0 | 0 | 0 | 0 | 0 | 0 | 0 | 0 | 0 | 1 | 0 | 2 | 0 | 0 | 0 | 0 | 0 |   |
| arCOG03579 |         | S | Uncharacterized conserved protein                    | 0 | 0 | 0 | 0 | 0 | 0 | 0 | 0 | 0 | 0 | 0 | 0 | 4 | 0 | 0 | 0 | 0 | 0 |   |
| arCOG03580 | COG2020 | O | Putative protein-S-isoprenylcysteine methyltransfer  | 1 | 1 | 0 | 0 | 0 | 0 | 1 | 1 | 0 | 1 | 1 | 1 | 3 | 0 | 3 | 0 | 0 | 0 | 0 |
| arCOG03581 | COG2020 | O | Putative protein-S-isoprenylcysteine methyltransfer  | 0 | 0 | 0 | 0 | 0 | 0 | 0 | 0 | 0 | 0 | 0 | 0 | 2 | 0 | 0 | 0 | 0 | 0 |   |
| arCOG03582 | COG3247 | S | Uncharacterized conserved protein                    | 0 | 0 | 0 | 0 | 0 | 0 | 0 | 0 | 0 | 0 | 3 | 0 | 0 | 0 | 0 | 0 | 0 | 0 |   |
| arCOG03583 | COG3247 | S | Uncharacterized conserved protein                    | 0 | 0 | 0 | 0 | 0 | 0 | 0 | 0 | 0 | 0 | 0 | 1 | 2 | 0 | 0 | 0 | 0 | 0 |   |
| arCOG03584 |         | S | Uncharacterized conserved protein                    | 0 | 0 | 0 | 0 | 0 | 0 | 0 | 0 | 0 | 0 | 2 | 0 | 0 | 0 | 0 | 0 | 0 | 0 |   |
| arCOG03585 | COG3547 | L | Transposase                                          | 0 | 0 | 0 | 0 | 1 | 0 | 0 | 1 | 0 | 0 | 1 | 0 | 3 | 0 | 0 | 0 | 0 | 0 |   |
| arCOG03586 | COG3547 | L | Transposase                                          | 0 | 2 | 0 | 0 | 0 | 0 | 0 | 1 | 0 | 0 | 0 | 0 | 0 | 0 | 0 | 0 | 0 | 0 |   |
| arCOG03587 | COG3547 | L | Transposase                                          | 0 | 2 | 0 | 0 | 0 | 0 | 0 | 0 | 0 | 0 | 0 | 0 | 0 | 0 | 0 | 0 | 0 | 0 |   |
| arCOG03588 | COG3315 | Q | O-Methyltransferase involved in polyketide biosynt   | 0 | 0 | 0 | 0 | 0 | 0 | 0 | 0 | 0 | 1 | 1 | 0 | 3 | 0 | 0 | 0 | 0 | 0 |   |
| arCOG03589 | COG3315 | Q | O-Methyltransferase involved in polyketide biosynt   | 0 | 0 | 0 | 0 | 0 | 0 | 0 | 0 | 0 | 0 | 0 | 0 | 2 | 0 | 0 | 0 | 0 | 0 |   |
| arCOG03590 |         | S | Uncharacterized conserved protein                    | 1 | 0 | 0 | 0 | 0 | 0 | 0 | 0 | 0 | 0 | 0 | 0 | 3 | 0 | 0 | 0 | 0 | 0 |   |
| arCOG03591 | COG2334 | R | Putative homoserine kinase type II (protein kinase f | 0 | 0 | 0 | 0 | 0 | 0 | 0 | 0 | 0 | 0 | 1 | 1 | 3 | 0 | 0 | 0 | 0 | 0 |   |
| arCOG03592 |         | S | Uncharacterized conserved protein                    | 0 | 0 | 0 | 0 | 0 | 0 | 0 | 0 | 0 | 0 | 0 | 0 | 3 | 0 | 0 | 0 | 0 | 0 |   |
| arCOG03593 |         | S | Uncharacterized conserved protein                    | 0 | 0 | 0 | 0 | 0 | 0 | 0 | 0 | 0 | 0 | 1 | 0 | 2 | 0 | 0 | 0 | 0 | 0 |   |
| arCOG03594 |         | S | Uncharacterized conserved protein                    | 0 | 0 | 0 | 0 | 0 | 0 | 0 | 0 | 0 | 0 | 0 | 0 | 2 | 0 | 0 | 0 | 0 | 0 |   |
| arCOG03595 |         | S | Uncharacterized conserved protein                    | 0 | 0 | 0 | 0 | 0 | 0 | 0 | 0 | 0 | 0 | 1 | 0 | 2 | 0 | 0 | 0 | 0 | 0 |   |
| arCOG03596 |         | S | Uncharacterized conserved protein                    | 0 | 0 | 0 | 0 | 0 | 0 | 0 | 0 | 0 | 0 | 0 | 0 | 2 | 0 | 0 | 0 | 0 | 0 |   |
| arCOG03597 |         | S | Uncharacterized conserved protein                    | 0 | 0 | 0 | 0 | 0 | 0 | 0 | 0 | 1 | 0 | 0 | 0 | 3 | 0 | 0 | 0 | 0 | 0 |   |
| arCOG03598 |         | S | Uncharacterized conserved protein                    | 0 | 0 | 0 | 0 | 0 | 0 | 0 | 0 | 0 | 0 | 0 | 0 | 3 | 0 | 0 | 0 | 0 | 0 |   |
| arCOG03599 |         | S | Uncharacterized conserved protein                    | 0 | 0 | 0 | 0 | 0 | 0 | 0 | 0 | 0 | 0 | 0 | 0 | 2 | 0 | 0 | 0 | 0 | 0 |   |
| arCOG03600 | COG1305 | E | Transglutaminase-like enzyme, putative cysteine prc  | 0 | 0 | 0 | 0 | 0 | 0 | 0 | 0 | 0 | 0 | 0 | 0 | 3 | 0 | 0 | 0 | 0 | 0 |   |
| arCOG03601 | COG1305 | E | Transglutaminase-like enzyme, putative cysteine prc  | 0 | 0 | 0 | 0 | 0 | 0 | 0 | 0 | 0 | 0 | 1 | 1 | 0 | 0 | 0 | 0 | 0 | 0 |   |
| arCOG03602 | COG4690 | E | Dipeptidase                                          | 1 | 0 | 1 | 0 | 0 | 0 | 0 | 0 | 0 | 0 | 2 | 0 | 2 | 0 | 0 | 0 | 0 | 0 | 0 |
| arCOG03606 |         | S | Uncharacterized conserved protein                    | 0 | 0 | 0 | 2 | 0 | 0 | 0 | 0 | 2 | 1 | 0 | 3 | 0 | 0 | 0 | 0 | 0 | 0 |   |
| arCOG03607 | COG4870 | O | Cysteine protease                                    | 0 | 0 | 0 | 0 | 0 | 0 | 0 | 0 | 0 | 0 | 2 | 0 | 3 | 0 | 0 | 0 | 0 | 0 |   |
| arCOG03610 | COG1404 | O | Subtilisin-like serine protease                      | 0 | 0 | 0 | 0 | 0 | 0 | 1 | 1 | 0 | 0 | 0 | 0 | 0 | 4 | 0 | 0 | 0 | 0 |   |
| arCOG03611 | COG1404 | O | Uncharacterized domain associated with subtilisin-li | 0 | 0 | 0 | 0 | 0 | 0 | 1 | 3 | 0 | 0 | 1 | 0 | 0 | 0 | 0 | 0 | 0 | 0 |   |
| arCOG03612 | COG3291 | R | PKD repeats containing protein                       | 0 | 0 | 0 | 0 | 0 | 0 | 0 | 0 | 0 | 0 | 0 | 0 | 1 | 0 | 0 | 0 | 0 | 0 |   |
| arCOG03613 |         | S | Uncharacterized conserved protein                    | 0 | 0 | 0 | 0 | 0 | 0 | 0 | 2 | 0 | 0 | 1 | 0 | 0 | 0 | 0 | 0 | 0 | 0 |   |
| arCOG03614 | COG4870 | O | Cysteine protease                                    | 0 | 0 | 0 | 0 | 0 | 0 | 0 | 0 | 0 | 0 | 0 | 0 | 2 | 0 | 0 | 0 | 0 | 0 |   |
| arCOG03615 |         | S | Uncharacterized conserved protein                    | 0 | 0 | 0 | 0 | 0 | 0 | 0 | 0 | 0 | 0 | 0 | 0 | 3 | 0 | 0 | 0 | 0 | 0 |   |
| arCOG03616 |         | S | Uncharacterized conserved protein                    | 0 | 0 | 0 | 0 | 0 | 0 | 0 | 0 | 0 | 0 | 0 | 0 | 2 | 0 | 0 | 0 | 0 | 0 |   |
| arCOG03617 | COG1857 | V | CRISPR system related protein                        | 0 | 0 | 1 | 0 | 0 | 0 | 0 | 0 | 1 | 0 | 0 | 0 | 2 | 0 | 3 | 0 | 0 | 1 | 0 |
| arCOG03618 | COG2230 | M | Cyclopropane fatty acid synthase or related methyltr | 0 | 0 | 0 | 0 | 0 | 0 | 0 | 0 | 0 | 0 | 0 | 0 | 3 | 0 | 0 | 0 | 0 | 0 |   |
| arCOG03619 | COG2230 | M | Cyclopropane fatty acid synthase or related methyltr | 0 | 0 | 0 | 0 | 0 | 0 | 0 | 0 | 0 | 0 | 0 | 0 | 3 | 0 | 0 | 0 | 0 | 0 |   |
| arCOG03620 | COG2155 | S | Uncharacterized conserved protein                    | 0 | 0 | 0 | 0 | 0 | 0 | 0 | 0 | 0 | 2 | 0 | 0 | 3 | 0 | 0 | 0 | 0 | 0 |   |
| arCOG03621 | COG2155 | S | Uncharacterized conserved protein                    | 0 | 0 | 0 | 0 | 0 | 0 | 0 | 0 | 0 | 0 | 0 | 1 | 2 | 0 | 0 | 0 | 0 | 0 |   |
| arCOG03622 |         | S | Uncharacterized conserved protein                    | 0 | 0 | 0 | 0 | 0 | 0 | 0 | 0 | 1 | 0 | 1 | 1 | 4 | 0 | 0 | 0 | 0 | 0 |   |
| arCOG03623 |         | S | Uncharacterized conserved protein                    | 0 | 0 | 0 | 0 | 0 | 0 | 0 | 0 | 0 | 0 | 0 | 0 | 3 | 0 | 0 | 0 | 0 | 0 |   |















|                    |   |                                                       |   |   |   |   |   |   |   |   |   |   |   |   |   |   |   |   |
|--------------------|---|-------------------------------------------------------|---|---|---|---|---|---|---|---|---|---|---|---|---|---|---|---|
| arCOG04596         | S | Uncharacterized conserved protein                     | 0 | 0 | 0 | 0 | 0 | 0 | 0 | 3 | 0 | 0 | 0 | 0 | 0 | 0 | 0 | 0 |
| arCOG04597         | S | Uncharacterized conserved protein                     | 0 | 0 | 0 | 0 | 0 | 0 | 0 | 3 | 0 | 0 | 0 | 0 | 0 | 0 | 0 | 0 |
| arCOG04598         | S | Uncharacterized conserved protein                     | 0 | 0 | 0 | 0 | 0 | 0 | 0 | 3 | 0 | 0 | 0 | 0 | 0 | 0 | 0 | 0 |
| arCOG04599         | S | Uncharacterized conserved protein                     | 0 | 0 | 0 | 0 | 0 | 0 | 0 | 4 | 0 | 0 | 0 | 0 | 0 | 0 | 0 | 0 |
| arCOG04600         | S | Zn finger domain containing protein                   | 0 | 0 | 0 | 0 | 0 | 0 | 0 | 4 | 0 | 0 | 0 | 0 | 0 | 0 | 0 | 0 |
| arCOG04601 COG1605 | E | Chorismate mutase                                     | 1 | 0 | 0 | 0 | 0 | 0 | 0 | 4 | 2 | 3 | 2 | 1 | 5 | 1 | 0 | 0 |
| arCOG04602         | S | Uncharacterized conserved protein                     | 0 | 0 | 0 | 0 | 0 | 0 | 0 | 4 | 0 | 0 | 0 | 0 | 0 | 0 | 0 | 0 |
| arCOG04603 COG0158 | G | Fructose-1,6-bisphosphatase                           | 0 | 0 | 0 | 0 | 0 | 0 | 0 | 4 | 0 | 0 | 2 | 0 | 0 | 0 | 0 | 0 |
| arCOG04604 COG4276 | S | Uncharacterized conserved protein                     | 0 | 0 | 0 | 0 | 0 | 0 | 0 | 4 | 0 | 0 | 0 | 0 | 0 | 0 | 0 | 0 |
| arCOG04605         | S | Uncharacterized conserved protein                     | 0 | 0 | 0 | 0 | 0 | 0 | 0 | 3 | 0 | 0 | 0 | 0 | 0 | 0 | 0 | 0 |
| arCOG04606         | S | Uncharacterized conserved protein                     | 0 | 0 | 0 | 0 | 0 | 0 | 0 | 4 | 0 | 0 | 0 | 0 | 0 | 0 | 0 | 0 |
| arCOG04607 COG5282 | S | Uncharacterized conserved protein                     | 0 | 0 | 0 | 0 | 0 | 0 | 0 | 4 | 0 | 0 | 0 | 0 | 0 | 0 | 0 | 0 |
| arCOG04608         | S | Uncharacterized conserved protein                     | 0 | 0 | 0 | 0 | 0 | 0 | 0 | 4 | 0 | 0 | 0 | 0 | 0 | 0 | 0 | 0 |
| arCOG04609         | S | Predicted lipoprotein                                 | 0 | 0 | 1 | 0 | 0 | 0 | 1 | 1 | 0 | 0 | 1 | 1 | 1 | 0 | 0 | 0 |
| arCOG04610         | K | CspG-family DNA-binding protein                       | 0 | 0 | 0 | 0 | 0 | 0 | 0 | 4 | 0 | 0 | 0 | 0 | 0 | 0 | 0 | 0 |
| arCOG04611 COG1165 | H | 2-succinyl-6-hydroxy-2,4-cyclohexadiene-1-carboxy     | 0 | 0 | 0 | 0 | 0 | 0 | 0 | 4 | 0 | 0 | 0 | 0 | 0 | 0 | 0 | 0 |
| arCOG04612 COG4044 | S | Uncharacterized protein conserved in archaea          | 0 | 0 | 0 | 0 | 0 | 1 | 0 | 4 | 0 | 0 | 0 | 0 | 4 | 1 | 4 | 0 |
| arCOG04613 COG1405 | K | Transcription initiation factor TFIIIB, Brf1 subunit/ | 0 | 0 | 0 | 0 | 0 | 0 | 0 | 4 | 0 | 0 | 0 | 0 | 0 | 0 | 0 | 0 |
| arCOG04614 COG1545 | R | Predicted nucleic-acid-binding protein containing a:  | 0 | 0 | 0 | 0 | 0 | 0 | 0 | 4 | 0 | 0 | 0 | 0 | 0 | 0 | 0 | 0 |
| arCOG04615         | R | Predicted glycosyltransferase                         | 0 | 0 | 0 | 0 | 0 | 0 | 0 | 3 | 0 | 0 | 0 | 0 | 0 | 0 | 1 | 0 |
| arCOG04616         | S | Uncharacterized conserved protein                     | 0 | 0 | 0 | 0 | 0 | 0 | 0 | 4 | 0 | 0 | 0 | 0 | 0 | 0 | 0 | 0 |
| arCOG04617         | S | Uncharacterized conserved protein                     | 0 | 0 | 0 | 0 | 0 | 0 | 0 | 4 | 0 | 0 | 0 | 0 | 0 | 0 | 0 | 0 |
| arCOG04618 COG3651 | S | Uncharacterized protein conserved in bacteria         | 0 | 0 | 0 | 0 | 0 | 0 | 0 | 3 | 0 | 0 | 0 | 0 | 0 | 0 | 0 | 0 |
| arCOG04619 COG3428 | S | Predicted membrane protein                            | 0 | 0 | 0 | 0 | 0 | 0 | 0 | 4 | 0 | 0 | 2 | 1 | 0 | 0 | 0 | 0 |
| arCOG04622 COG3402 | S | Uncharacterized conserved protein                     | 0 | 0 | 0 | 0 | 0 | 0 | 0 | 4 | 0 | 0 | 0 | 1 | 0 | 0 | 0 | 0 |
| arCOG04623 COG3380 | R | Predicted NAD/FAD-dependent oxidoreductase            | 0 | 0 | 0 | 0 | 0 | 0 | 0 | 4 | 0 | 0 | 0 | 0 | 0 | 0 | 0 | 0 |
| arCOG04624 COG0431 | R | Predicted flavoprotein                                | 0 | 1 | 0 | 2 | 0 | 0 | 0 | 2 | 0 | 0 | 0 | 1 | 0 | 0 | 1 | 1 |
| arCOG04625         | S | Uncharacterized conserved protein                     | 0 | 0 | 0 | 0 | 0 | 0 | 0 | 4 | 0 | 0 | 0 | 0 | 0 | 0 | 0 | 0 |
| arCOG04626         | S | Uncharacterized conserved protein                     | 0 | 0 | 0 | 0 | 0 | 0 | 0 | 4 | 0 | 0 | 0 | 1 | 0 | 0 | 0 | 0 |
| arCOG04627 COG0451 | M | Nucleoside-diphosphate-sugar epimerase                | 0 | 0 | 0 | 0 | 0 | 0 | 0 | 1 | 0 | 0 | 0 | 0 | 2 | 0 | 0 | 0 |
| arCOG04628 COG1547 | R | Predicted metal-dependent hydrolase                   | 0 | 0 | 0 | 0 | 0 | 0 | 0 | 4 | 0 | 0 | 0 | 0 | 0 | 0 | 0 | 0 |
| arCOG04629         | S | Uncharacterized conserved protein                     | 0 | 0 | 0 | 0 | 0 | 0 | 0 | 3 | 0 | 0 | 0 | 0 | 0 | 0 | 0 | 0 |
| arCOG04630         | S | Uncharacterized conserved protein                     | 0 | 0 | 0 | 0 | 0 | 0 | 0 | 4 | 0 | 0 | 0 | 0 | 0 | 0 | 0 | 0 |
| arCOG04631 COG2718 | S | Uncharacterized conserved protein                     | 0 | 0 | 0 | 0 | 0 | 0 | 0 | 4 | 0 | 0 | 0 | 0 | 0 | 0 | 0 | 0 |
| arCOG04632 COG2719 | R | Uncharacterized membrane protein, required for deh    | 0 | 0 | 0 | 0 | 0 | 0 | 0 | 4 | 0 | 0 | 0 | 0 | 0 | 0 | 0 | 0 |
| arCOG04633 COG0526 | O | Thiol-disulfide isomerase or thioredoxin              | 0 | 0 | 0 | 0 | 0 | 0 | 0 | 4 | 0 | 0 | 0 | 0 | 0 | 0 | 0 | 0 |
| arCOG04634 COG1472 | G | Beta-glucosidase-related glycosidase                  | 0 | 1 | 2 | 0 | 0 | 0 | 0 | 1 | 0 | 0 | 0 | 1 | 0 | 0 | 0 | 1 |
| arCOG04635         | S | Uncharacterized conserved protein                     | 0 | 0 | 0 | 0 | 0 | 0 | 0 | 4 | 0 | 0 | 0 | 0 | 0 | 0 | 0 | 0 |
| arCOG04636         | S | Uncharacterized conserved protein                     | 0 | 0 | 0 | 0 | 0 | 0 | 0 | 3 | 0 | 0 | 0 | 0 | 0 | 0 | 0 | 0 |
| arCOG04637         | S | Uncharacterized conserved protein                     | 0 | 0 | 0 | 0 | 0 | 0 | 0 | 4 | 0 | 0 | 0 | 0 | 0 | 0 | 0 | 0 |
| arCOG04638 COG2836 | S | Uncharacterized conserved protein                     | 0 | 0 | 0 | 0 | 0 | 0 | 0 | 3 | 0 | 0 | 0 | 0 | 0 | 0 | 0 | 0 |
| arCOG04639         | S | Uncharacterized conserved protein                     | 0 | 0 | 0 | 0 | 0 | 0 | 0 | 4 | 0 | 0 | 0 | 0 | 0 | 0 | 0 | 0 |
| arCOG04640         | S | Uncharacterized conserved protein                     | 0 | 0 | 0 | 0 | 0 | 0 | 0 | 4 | 0 | 0 | 0 | 0 | 0 | 0 | 0 | 0 |
| arCOG04641 COG2860 | S | Predicted membrane protein                            | 0 | 3 | 4 | 1 | 0 | 0 | 0 | 2 | 0 | 2 | 1 | 1 | 0 | 0 | 0 | 0 |
| arCOG04642         | S | Uncharacterized conserved protein                     | 0 | 0 | 0 | 0 | 0 | 0 | 0 | 4 | 0 | 0 | 3 | 0 | 0 | 0 | 0 | 0 |
| arCOG04643         | S | Uncharacterized conserved protein                     | 0 | 0 | 0 | 0 | 0 | 0 | 0 | 4 | 0 | 0 | 0 | 0 | 0 | 0 | 0 | 0 |
| arCOG04644         | S | Uncharacterized conserved protein                     | 0 | 0 | 0 | 0 | 0 | 0 | 0 | 3 | 0 | 0 | 0 | 0 | 0 | 0 | 0 | 0 |
| arCOG04645         | S | Uncharacterized conserved protein                     | 0 | 0 | 0 | 0 | 0 | 0 | 0 | 3 | 0 | 0 | 0 | 0 | 0 | 0 | 0 | 0 |
| arCOG04646 COG3011 | R | Thioredoxin superfamily protein                       | 0 | 0 | 0 | 0 | 0 | 0 | 0 | 3 | 0 | 0 | 0 | 0 | 0 | 0 | 0 | 0 |
| arCOG04647 COG0271 | T | Stress-induced morphogen (activity unknown)           | 0 | 0 | 0 | 0 | 0 | 0 | 0 | 4 | 0 | 0 | 0 | 0 | 0 | 0 | 0 | 0 |
| arCOG04648 COG0278 | O | Glutaredoxin-related protein                          | 0 | 0 | 0 | 0 | 0 | 0 | 0 | 4 | 0 | 0 | 0 | 0 | 0 | 0 | 0 | 0 |
| arCOG04649         | S | Uncharacterized conserved protein                     | 0 | 0 | 0 | 0 | 0 | 0 | 0 | 4 | 0 | 0 | 0 | 0 | 0 | 0 | 0 | 0 |
| arCOG04650 COG1845 | C | Heme/copper-type cytochrome/quinol oxidase, subu      | 0 | 0 | 0 | 0 | 0 | 1 | 0 | 0 | 0 | 0 | 0 | 0 | 0 | 0 | 0 | 0 |
| arCOG04651         | S | Uncharacterized conserved protein                     | 0 | 0 | 0 | 0 | 0 | 0 | 0 | 3 | 0 | 0 | 0 | 0 | 0 | 0 | 0 | 0 |
| arCOG04652         | S | Uncharacterized conserved protein                     | 0 | 0 | 0 | 0 | 0 | 0 | 1 | 2 | 0 | 0 | 1 | 1 | 1 | 0 | 0 | 0 |
| arCOG04653 COG1413 | S | HEAT repeats containing protein                       | 0 | 0 | 0 | 0 | 0 | 0 | 0 | 4 | 0 | 0 | 0 | 0 | 0 | 0 | 0 | 0 |
| arCOG04654 COG0839 | C | NADH dehydrogenase subunit J                          | 2 | 3 | 1 | 2 | 0 | 1 | 0 | 4 | 0 | 0 | 0 | 0 | 4 | 0 | 0 | 3 |
| arCOG04655 COG3269 | R | Predicted RNA-binding protein, contains TRAM do       | 0 | 0 | 0 | 0 | 0 | 0 | 0 | 3 | 0 | 0 | 0 | 0 | 0 | 0 | 0 | 0 |
| arCOG04656 COG1077 | D | MeiH/Mbi protein, ATPase                              | 0 | 0 | 0 | 0 | 0 | 0 | 0 | 3 | 0 | 0 | 0 | 0 | 0 | 0 | 0 | 0 |
| arCOG04657         | S | Uncharacterized conserved protein                     | 0 | 0 | 0 | 0 | 0 | 0 | 0 | 4 | 0 | 0 | 0 | 0 | 0 | 0 | 0 | 0 |
| arCOG04658 COG3470 | P | Uncharacterized conserved protein                     | 0 | 0 | 0 | 0 | 0 | 0 | 0 | 4 | 0 | 0 | 0 | 0 | 0 | 0 | 0 | 0 |
| arCOG04659 COG0398 | S | Uncharacterized conserved membrane protein            | 0 | 0 | 0 | 0 | 0 | 0 | 0 | 4 | 0 | 0 | 0 | 1 | 0 | 0 | 0 | 0 |
| arCOG04660         | S | Uncharacterized conserved protein                     | 0 | 0 | 0 | 0 | 0 | 0 | 0 | 3 | 0 | 0 | 0 | 0 | 0 | 0 | 0 | 0 |
| arCOG04661         | S | Uncharacterized conserved protein                     | 0 | 0 | 0 | 0 | 0 | 0 | 0 | 3 | 0 | 0 | 0 | 0 | 0 | 0 | 0 | 0 |
| arCOG04662         | S | Uncharacterized conserved protein                     | 0 | 0 | 0 | 0 | 0 | 0 | 0 | 4 | 0 | 0 | 1 | 0 | 0 | 0 | 0 | 0 |
| arCOG04663         | S | Uncharacterized conserved protein                     | 0 | 0 | 0 | 0 | 0 | 0 | 0 | 3 | 0 | 0 | 0 | 0 | 0 | 0 | 0 | 0 |
| arCOG04664         | R | Predicted membrane-bound metal-dependent hydrol       | 0 | 0 | 0 | 0 | 0 | 0 | 0 | 4 | 0 | 0 | 0 | 0 | 0 | 0 | 0 | 0 |
| arCOG04665         | S | Uncharacterized conserved protein                     | 0 | 0 | 0 | 0 | 0 | 0 | 0 | 4 | 0 | 0 | 0 | 0 | 0 | 0 | 0 | 0 |
| arCOG04666         | S | Uncharacterized conserved protein                     | 0 | 0 | 0 | 0 | 0 | 0 | 0 | 3 | 0 | 0 | 0 | 0 | 0 | 0 | 0 | 0 |
| arCOG04667         | S | Uncharacterized conserved protein                     | 0 | 0 | 0 | 0 | 0 | 0 | 0 | 4 | 0 | 0 | 0 | 0 | 0 | 0 | 0 | 0 |
| arCOG04668         | S | Uncharacterized conserved protein                     | 0 | 0 | 0 | 0 | 0 | 0 | 0 | 2 | 0 | 0 | 0 | 0 | 0 | 0 | 0 | 0 |
| arCOG04669         | S | Uncharacterized conserved protein                     | 0 | 0 | 0 | 0 | 0 | 0 | 0 | 3 | 0 | 0 | 0 | 0 | 0 | 0 | 0 | 0 |
| arCOG04670 COG2987 | E | Urocanate hydratase                                   | 0 | 0 | 1 | 0 | 0 | 0 | 0 | 2 | 0 | 0 | 0 | 0 | 0 | 0 | 0 | 3 |
| arCOG04671 COG2986 | E | Histidine ammonia-lyase                               | 0 | 0 | 1 | 0 | 0 | 0 | 0 | 2 | 0 | 0 | 0 | 0 | 0 | 0 | 0 | 3 |
| arCOG04672         | S | Transcriptional regulator, HTH domain                 | 0 | 0 | 0 | 0 | 0 | 0 | 0 | 3 | 0 | 0 | 0 | 0 | 0 | 0 | 0 | 0 |
| arCOG04673         | S | Uncharacterized conserved protein                     | 0 | 0 | 0 | 0 | 0 | 0 | 0 | 3 | 0 | 0 | 0 | 0 | 0 | 0 | 0 | 0 |
| arCOG04674         | S | Uncharacterized conserved protein                     | 0 | 0 | 0 | 0 | 0 | 0 | 0 | 4 | 0 | 0 | 0 | 0 | 0 | 0 | 0 | 0 |
| arCOG04675         | S | Uncharacterized conserved protein                     | 0 | 0 | 0 | 0 | 0 | 0 | 0 | 4 | 0 | 0 | 0 | 0 | 0 | 0 | 0 | 0 |
| arCOG04676 COG1619 | V | Uncharacterized protein, homolog of microcin C7 re    | 0 | 0 | 1 | 0 | 0 | 0 | 0 | 2 | 0 | 0 | 0 | 0 | 0 | 0 | 0 | 3 |
| arCOG04677 COG1884 | I | Methylmalonyl-CoA mutase, N-terminal domain/sul       | 0 | 0 | 0 | 0 | 0 | 0 | 0 | 2 | 0 | 0 | 0 | 0 | 0 | 0 | 0 | 0 |
| arCOG04678 COG2109 | H | ATP:corrinoid adenosyltransferase                     | 0 | 0 | 4 | 2 | 0 | 1 | 0 | 4 | 0 | 0 | 1 | 0 | 3 | 0 | 4 | 2 |
| arCOG04679         | S | Uncharacterized conserved protein                     | 0 | 0 | 0 | 0 | 0 | 0 | 0 | 4 | 0 | 0 | 0 | 1 | 0 | 0 | 0 | 0 |
| arCOG04680         | S | Uncharacterized conserved protein                     | 0 | 0 | 0 | 0 | 0 | 0 | 0 | 3 | 0 | 0 | 0 | 0 | 0 | 0 | 0 | 0 |
| arCOG04681 COG1640 | G | 4-alpha-glucanotransferase                            | 0 | 0 | 0 | 0 | 0 | 0 | 0 | 2 | 0 | 0 | 2 | 1 | 0 | 0 | 0 | 0 |
| arCOG04682 COG3173 | R | Predicted aminoglycoside phosphotransferase           | 0 | 0 | 0 | 0 | 0 | 0 | 0 | 3 | 0 | 0 | 0 | 0 | 0 | 0 | 0 | 0 |
| arCOG04683         | S | Uncharacterized conserved protein                     | 0 | 0 | 0 | 0 | 0 | 0 | 0 | 3 | 0 | 0 | 0 | 0 | 0 | 0 | 0 | 0 |
| arCOG04684 COG0662 | G | Cupin domain                                          | 0 | 0 | 0 | 0 | 0 | 0 | 0 | 3 | 0 | 0 | 0 | 0 | 0 | 0 | 0 | 0 |
| arCOG04685         | H | Lycopene cyclase                                      | 0 | 0 | 0 | 0 | 0 | 0 | 0 | 4 | 0 | 0 | 0 | 0 | 0 | 0 | 0 | 0 |
| arCOG04686 COG0557 | K | Exoribonuclease R                                     | 0 | 0 | 0 | 0 | 0 | 0 | 0 | 4 | 0 | 0 | 2 | 1 | 1 | 0 | 0 | 0 |
| arCOG04687         | S | Uncharacterized conserved protein                     | 0 | 0 | 0 | 0 | 0 | 0 | 0 | 3 | 0 | 0 | 0 | 0 | 0 | 0 | 0 | 0 |
| arCOG04688         | S | Uncharacterized conserved protein                     | 0 | 0 | 0 | 0 | 0 | 0 | 0 | 4 | 0 | 0 | 0 | 0 | 0 | 0 | 0 | 0 |
| arCOG04689         | S | Zn-finger domains containing protein                  | 0 | 0 | 0 | 0 | 0 | 0 | 0 | 4 | 0 | 0 | 0 | 0 | 0 | 0 | 0 | 0 |
| arCOG04690         | S | Uncharacterized conserved protein                     | 0 | 0 |   |   |   |   |   |   |   |   |   |   |   |   |   |   |













































|                    |   |                                                                      |     |   |   |   |   |   |   |   |   |   |   |   |   |   |   |
|--------------------|---|----------------------------------------------------------------------|-----|---|---|---|---|---|---|---|---|---|---|---|---|---|---|
| arCOG07613         | S | Uncharacterized conserved protein                                    | 0   | 0 | 0 | 0 | 0 | 0 | 0 | 2 | 0 | 0 | 0 | 0 | 0 | 0 | 0 |
| arCOG07614 COG0121 | R | Predicted glutamine amidotransferase                                 | 0   | 0 | 0 | 0 | 0 | 0 | 1 | 1 | 0 | 0 | 0 | 0 | 2 | 0 | 0 |
| arCOG07615 COG0707 | M | UDP-N-acetylglucosamine-6-phosphate N-acetylglucosaminyl transferase | 0   | 0 | 0 | 0 | 0 | 0 | 0 | 2 | 0 | 0 | 0 | 0 | 0 | 0 | 0 |
| arCOG07616 COG2450 | S | Uncharacterized conserved protein                                    | 0   | 0 | 0 | 0 | 0 | 0 | 0 | 2 | 0 | 0 | 0 | 0 | 0 | 0 | 0 |
| arCOG07617         | C | Multitheme cytochrome                                                | 1   | 0 | 0 | 0 | 0 | 0 | 0 | 0 | 0 | 0 | 1 | 0 | 0 | 0 | 0 |
| arCOG07618         | V | PIN domain containing protein                                        | 0   | 0 | 0 | 0 | 0 | 0 | 0 | 0 | 0 | 1 | 0 | 1 | 0 | 0 | 0 |
| arCOG07619 COG0642 | T | Signal transduction histidine kinase                                 | 0   | 0 | 0 | 0 | 0 | 0 | 0 | 0 | 0 | 0 | 0 | 2 | 0 | 0 | 0 |
| arCOG07622         | S | Uncharacterized conserved protein                                    | 0   | 0 | 0 | 0 | 0 | 0 | 0 | 0 | 0 | 0 | 0 | 2 | 0 | 0 | 0 |
| arCOG07623         | E | Predicted peptidase family C39                                       | 0   | 0 | 0 | 0 | 0 | 0 | 0 | 0 | 0 | 0 | 2 | 0 | 0 | 0 | 0 |
| arCOG07624         | S | Uncharacterized conserved protein                                    | 0   | 0 | 0 | 0 | 0 | 0 | 0 | 0 | 1 | 0 | 0 | 1 | 0 | 0 | 0 |
| arCOG07625 COG4185 | S | Uncharacterized protein conserved in bacteria                        | 0   | 0 | 0 | 0 | 0 | 0 | 0 | 0 | 1 | 0 | 1 | 0 | 0 | 0 | 0 |
| arCOG07626         | S | Uncharacterized conserved protein                                    | 0   | 0 | 1 | 0 | 0 | 0 | 0 | 0 | 1 | 0 | 0 | 0 | 0 | 0 | 0 |
| arCOG07627         | S | Uncharacterized conserved protein                                    | 0   | 0 | 0 | 0 | 0 | 0 | 0 | 0 | 1 | 0 | 0 | 0 | 1 | 0 | 0 |
| arCOG07628         | S | Uncharacterized conserved protein                                    | 0   | 0 | 0 | 1 | 0 | 0 | 0 | 0 | 1 | 0 | 0 | 0 | 0 | 0 | 0 |
| arCOG07629         | R | DEAD-box helicase                                                    | 0   | 0 | 0 | 0 | 0 | 0 | 0 | 0 | 2 | 0 | 0 | 0 | 0 | 0 | 0 |
| arCOG07630         | S | Uncharacterized conserved protein                                    | 0   | 0 | 0 | 0 | 0 | 0 | 0 | 0 | 2 | 0 | 0 | 0 | 0 | 0 | 0 |
| arCOG07631         | S | Uncharacterized conserved protein                                    | 0   | 0 | 0 | 0 | 0 | 0 | 0 | 0 | 1 | 0 | 0 | 0 | 0 | 1 | 0 |
| arCOG07632         | S | Uncharacterized conserved protein                                    | 0   | 0 | 0 | 0 | 0 | 0 | 0 | 0 | 2 | 0 | 0 | 0 | 0 | 0 | 0 |
| arCOG07633         | S | Uncharacterized conserved protein                                    | 0   | 0 | 0 | 0 | 0 | 0 | 0 | 0 | 2 | 0 | 0 | 0 | 0 | 0 | 0 |
| arCOG07634         | S | Uncharacterized conserved protein                                    | 0   | 0 | 0 | 0 | 0 | 0 | 0 | 0 | 2 | 0 | 0 | 0 | 0 | 0 | 0 |
| arCOG07635         | S | Uncharacterized conserved protein                                    | 0   | 0 | 0 | 0 | 0 | 0 | 0 | 0 | 2 | 0 | 0 | 0 | 0 | 0 | 0 |
| arCOG07636 COG1592 | C | Ruberythrin                                                          | 0   | 0 | 0 | 0 | 0 | 0 | 0 | 0 | 2 | 0 | 0 | 0 | 0 | 0 | 0 |
| arCOG07637         | S | NosD related cell surface protein                                    | 0   | 0 | 0 | 0 | 0 | 0 | 0 | 0 | 2 | 0 | 0 | 0 | 0 | 0 | 0 |
| arCOG07638         | S | Uncharacterized conserved protein                                    | 0   | 0 | 0 | 0 | 0 | 0 | 0 | 0 | 2 | 0 | 0 | 0 | 0 | 0 | 0 |
| arCOG07640         | S | beta/gama crystallin family protein                                  | 0   | 0 | 0 | 0 | 0 | 0 | 0 | 0 | 0 | 0 | 2 | 0 | 0 | 0 | 0 |
| arCOG07641 COG1517 | V | CRISPR-associated protein                                            | 0   | 0 | 0 | 0 | 0 | 0 | 0 | 0 | 1 | 1 | 0 | 1 | 0 | 0 | 0 |
| arCOG07642         | S | Uncharacterized conserved protein                                    | 0   | 0 | 0 | 0 | 0 | 0 | 0 | 0 | 0 | 0 | 0 | 2 | 0 | 0 | 0 |
| arCOG07643         | S | Uncharacterized conserved protein                                    | 0   | 0 | 0 | 0 | 0 | 0 | 0 | 0 | 0 | 0 | 0 | 2 | 0 | 0 | 0 |
| arCOG07644         | S | Uncharacterized conserved protein                                    | 0   | 0 | 0 | 0 | 0 | 0 | 0 | 0 | 0 | 0 | 0 | 3 | 0 | 0 | 0 |
| arCOG07645         | S | Uncharacterized conserved protein                                    | 0   | 0 | 0 | 0 | 0 | 0 | 0 | 0 | 0 | 0 | 0 | 2 | 0 | 0 | 0 |
| arCOG07646         | S | Uncharacterized conserved protein                                    | 0   | 0 | 0 | 0 | 0 | 0 | 0 | 0 | 0 | 0 | 0 | 2 | 0 | 0 | 0 |
| arCOG07647         | S | Uncharacterized conserved protein                                    | 0   | 0 | 0 | 0 | 0 | 0 | 0 | 0 | 0 | 0 | 0 | 3 | 0 | 0 | 0 |
| arCOG07648         | S | Uncharacterized conserved protein                                    | 0   | 0 | 0 | 0 | 0 | 0 | 0 | 0 | 0 | 0 | 0 | 2 | 0 | 0 | 0 |
| arCOG07649         | S | Uncharacterized conserved protein                                    | 0   | 0 | 0 | 0 | 0 | 0 | 0 | 0 | 0 | 0 | 0 | 2 | 0 | 0 | 0 |
| arCOG07650         | S | Uncharacterized conserved protein                                    | 0   | 0 | 0 | 0 | 0 | 0 | 0 | 0 | 0 | 0 | 0 | 2 | 0 | 0 | 0 |
| arCOG07651 COG0210 | L | DNA helicase, fragment?                                              | 0   | 0 | 0 | 0 | 0 | 0 | 0 | 0 | 0 | 0 | 0 | 2 | 0 | 0 | 0 |
| arCOG07652 COG5519 | L | Superfamily II helicase or inactivated derivatives                   | 0   | 0 | 0 | 0 | 0 | 0 | 0 | 0 | 0 | 0 | 0 | 2 | 0 | 0 | 0 |
| arCOG07653         | S | Uncharacterized conserved protein                                    | 0   | 0 | 0 | 0 | 0 | 0 | 0 | 0 | 0 | 0 | 0 | 2 | 0 | 0 | 0 |
| arCOG07654 COG5337 | M | Spore coat assembly protein                                          | 0   | 0 | 0 | 0 | 0 | 0 | 0 | 0 | 0 | 3 | 0 | 1 | 0 | 0 | 0 |
| arCOG07655         | S | Uncharacterized conserved protein                                    | 0   | 0 | 0 | 0 | 0 | 0 | 0 | 0 | 0 | 0 | 1 | 1 | 0 | 0 | 0 |
| arCOG07656         | S | Uncharacterized conserved protein                                    | 0   | 0 | 0 | 0 | 0 | 0 | 0 | 0 | 0 | 0 | 0 | 2 | 0 | 0 | 0 |
| arCOG07657         | S | Zn-finger protein                                                    | 0   | 0 | 0 | 0 | 0 | 0 | 0 | 0 | 0 | 0 | 0 | 2 | 0 | 0 | 0 |
| arCOG07658         | R | Transglutaminase family protease                                     | 0   | 0 | 0 | 0 | 0 | 0 | 0 | 0 | 0 | 0 | 0 | 3 | 0 | 0 | 0 |
| arCOG07660         | S | Uncharacterized conserved protein                                    | 0   | 0 | 0 | 0 | 0 | 0 | 0 | 0 | 0 | 0 | 1 | 1 | 0 | 0 | 0 |
| arCOG07661 COG3594 | G | Fucose 4-O-acetylase or related acetyltransferase                    | 0   | 0 | 0 | 0 | 0 | 0 | 0 | 0 | 0 | 0 | 0 | 2 | 0 | 0 | 0 |
| arCOG07662         | R | Transposase related protein                                          | 0   | 0 | 0 | 0 | 0 | 0 | 0 | 0 | 1 | 0 | 0 | 2 | 0 | 0 | 0 |
| arCOG07663 COG3385 | L | Transposase                                                          | 0   | 0 | 0 | 0 | 0 | 0 | 0 | 0 | 0 | 0 | 0 | 2 | 0 | 0 | 0 |
| arCOG07664         | R | Transposase related protein                                          | 0   | 0 | 0 | 0 | 0 | 0 | 0 | 0 | 0 | 1 | 0 | 2 | 0 | 0 | 0 |
| arCOG07665         | S | Uncharacterized conserved protein                                    | 0   | 0 | 0 | 0 | 0 | 0 | 0 | 0 | 1 | 0 | 0 | 1 | 0 | 0 | 0 |
| arCOG07666         | S | Uncharacterized conserved protein                                    | 0   | 0 | 0 | 0 | 0 | 0 | 0 | 0 | 0 | 0 | 0 | 2 | 0 | 0 | 0 |
| arCOG07667         | S | Uncharacterized conserved protein                                    | 0   | 0 | 0 | 0 | 0 | 0 | 0 | 0 | 0 | 0 | 0 | 2 | 0 | 0 | 0 |
| arCOG07668         | S | Uncharacterized conserved protein                                    | 0   | 0 | 0 | 0 | 0 | 0 | 0 | 0 | 0 | 0 | 0 | 2 | 0 | 0 | 0 |
| arCOG07669         | S | Uncharacterized conserved protein                                    | 0   | 0 | 0 | 0 | 0 | 0 | 0 | 0 | 1 | 0 | 1 | 0 | 0 | 0 | 0 |
| arCOG07670         | S | Uncharacterized conserved protein                                    | 0   | 0 | 0 | 0 | 0 | 0 | 0 | 0 | 0 | 0 | 0 | 2 | 0 | 0 | 0 |
| arCOG07671         | R | Transposase related protein                                          | 0   | 0 | 0 | 0 | 0 | 0 | 0 | 0 | 0 | 0 | 0 | 3 | 0 | 0 | 0 |
| arCOG07672         | S | Uncharacterized conserved protein                                    | 0   | 0 | 0 | 0 | 0 | 0 | 0 | 0 | 0 | 1 | 0 | 1 | 0 | 0 | 0 |
| arCOG07673         | S | Uncharacterized conserved protein                                    | 0   | 0 | 0 | 0 | 0 | 0 | 0 | 0 | 0 | 0 | 0 | 2 | 0 | 0 | 0 |
| arCOG07674 COG4097 | P | Predicted ferric reductase                                           | 0   | 0 | 0 | 0 | 0 | 0 | 0 | 0 | 0 | 1 | 0 | 1 | 0 | 0 | 0 |
| arCOG07675 COG0326 | O | Molecular chaperone, HSP90 family                                    | 0   | 0 | 0 | 0 | 0 | 0 | 0 | 0 | 0 | 1 | 0 | 1 | 0 | 0 | 0 |
| arCOG07676         | S | Uncharacterized conserved protein                                    | 0   | 0 | 0 | 0 | 0 | 0 | 0 | 0 | 0 | 2 | 0 | 0 | 0 | 0 | 0 |
| arCOG07677         | R | Catecholamine-binding domain (DOMON) containi                        | 0   | 0 | 0 | 0 | 0 | 0 | 0 | 0 | 0 | 1 | 0 | 0 | 0 | 1 | 0 |
| arCOG07678         | S | Uncharacterized conserved protein                                    | 0   | 0 | 1 | 0 | 1 | 0 | 0 | 0 | 0 | 1 | 0 | 0 | 0 | 0 | 0 |
| arCOG07679 COG3580 | S | HSP70-class ATPase fused to uncharacterized protei                   | 0   | 0 | 0 | 0 | 0 | 0 | 0 | 0 | 0 | 2 | 0 | 0 | 0 | 0 | 0 |
| arCOG07680 COG2832 | S | Uncharacterized protein conserved in bacteria                        | 0   | 0 | 0 | 0 | 0 | 0 | 0 | 0 | 1 | 1 | 0 | 0 | 0 | 0 | 0 |
| arCOG07681         | S | Uncharacterized conserved protein                                    | 0   | 0 | 0 | 0 | 0 | 0 | 0 | 0 | 0 | 0 | 0 | 0 | 0 | 0 | 0 |
| arCOG07682         | S | Uncharacterized conserved protein                                    | 0   | 0 | 0 | 0 | 0 | 0 | 0 | 1 | 0 | 0 | 1 | 0 | 0 | 0 | 0 |
| arCOG07683 COG1637 | L | Predicted nuclease of the RecB family                                | 0   | 0 | 0 | 0 | 0 | 0 | 0 | 1 | 0 | 0 | 1 | 0 | 0 | 0 | 0 |
| arCOG07684 COG0463 | M | Glycosyltransferase                                                  | 0   | 1 | 0 | 0 | 0 | 0 | 0 | 0 | 0 | 0 | 0 | 0 | 0 | 1 | 0 |
| arCOG07685         | S | Uncharacterized conserved protein                                    | 0   | 0 | 1 | 0 | 0 | 0 | 0 | 0 | 0 | 0 | 0 | 0 | 0 | 1 | 0 |
| arCOG07686         | S | Uncharacterized conserved protein                                    | 0   | 0 | 0 | 0 | 0 | 0 | 0 | 0 | 0 | 0 | 0 | 0 | 0 | 2 | 0 |
| arCOG07687 COG1517 | V | CRISPR system related protein                                        | 0   | 1 | 0 | 0 | 0 | 0 | 0 | 0 | 0 | 0 | 0 | 0 | 0 | 0 | 0 |
| arCOG07688         | S | Uncharacterized conserved membrane protein                           | 0   | 0 | 2 | 0 | 0 | 0 | 0 | 0 | 0 | 0 | 0 | 0 | 0 | 0 | 0 |
| arCOG07689         | S | Uncharacterized conserved protein                                    | 1   | 0 | 1 | 0 | 0 | 0 | 0 | 0 | 0 | 0 | 0 | 0 | 0 | 0 | 0 |
| arCOG07690         | S | Uncharacterized conserved protein                                    | 0   | 0 | 2 | 0 | 0 | 0 | 0 | 0 | 0 | 0 | 0 | 0 | 0 | 0 | 0 |
| arCOG07691         | S | Uncharacterized conserved protein                                    | 0   | 0 | 2 | 0 | 0 | 0 | 0 | 0 | 0 | 0 | 0 | 0 | 0 | 0 | 0 |
| arCOG07692         | S | Uncharacterized conserved protein                                    | 0   | 0 | 2 | 0 | 0 | 0 | 0 | 0 | 0 | 0 | 0 | 0 | 0 | 0 | 0 |
| arCOG07693         | S | Uncharacterized conserved protein                                    | 0   | 0 | 2 | 0 | 0 | 0 | 0 | 0 | 0 | 0 | 0 | 0 | 0 | 0 | 0 |
| arCOG07694         | S | Uncharacterized conserved protein                                    | 0   | 0 | 2 | 0 | 0 | 0 | 0 | 0 | 0 | 0 | 0 | 0 | 0 | 0 | 0 |
| arCOG07695         | S | Uncharacterized conserved protein                                    | 0   | 0 | 2 | 0 | 0 | 0 | 0 | 0 | 0 | 0 | 0 | 0 | 0 | 0 | 0 |
| arCOG07696         | S | Uncharacterized conserved protein                                    | 0   | 0 | 2 | 0 | 0 | 0 | 0 | 0 | 0 | 0 | 0 | 0 | 0 | 0 | 0 |
| arCOG07697         | S | Uncharacterized conserved protein                                    | 0   | 0 | 2 | 0 | 0 | 0 | 0 | 0 | 0 | 0 | 0 | 0 | 0 | 0 | 0 |
| arCOG07698         | S | Uncharacterized conserved protein                                    | 0   | 0 | 0 | 0 | 0 | 0 | 0 | 0 | 0 | 0 | 0 | 0 | 0 | 2 | 0 |
| arCOG07699         | S | Uncharacterized conserved protein                                    | 0   | 0 | 0 | 0 | 0 | 0 | 0 | 0 | 0 | 0 | 0 | 0 | 3 | 0 | 0 |
| arCOG07700 COG2730 | G | Endoglycanase                                                        | 0   | 0 | 0 | 0 | 0 | 0 | 0 | 0 | 0 | 0 | 0 | 0 | 0 | 2 | 0 |
| arCOG07701         | S | Uncharacterized conserved protein                                    | 0   | 0 | 0 | 0 | 0 | 0 | 0 | 0 | 0 | 0 | 0 | 0 | 2 | 0 | 0 |
| arCOG07702 COG0438 | M | Glycosyltransferase                                                  | 0   | 0 | 0 | 0 | 0 | 0 | 0 | 0 | 0 | 0 | 0 | 0 | 0 | 2 | 0 |
| arCOG07703         | S | Uncharacterized conserved protein                                    | 0   | 0 | 0 | 0 | 0 | 0 | 0 | 0 | 0 | 0 | 0 | 0 | 0 | 2 | 0 |
| arCOG07704 COG1848 | V | PIN domain containing protein                                        | 0   | 0 | 0 | 0 | 0 | 0 | 0 | 0 | 0 | 0 | 0 | 0 | 2 | 0 | 0 |
| arCOG07705         | S | Uncharacterized conserved protein                                    | 0   | 0 | 0 | 0 | 0 | 0 | 0 | 0 | 0 | 0 | 0 | 0 | 0 | 2 | 0 |
| arCOG07706         | S | Uncharacterized conserved protein                                    | 0   | 0 | 0 | 0 | 0 | 0 | 0 | 0 | 0 | 0 | 0 | 0 | 0 | 2 | 0 |
| arCOG07707         | S | Uncharacterized conserved protein                                    | 0   | 0 | 0 | 0 | 0 | 0 | 0 | 0 | 0 | 0 | 0 | 0 | 2 | 0 | 0 |
| arCOG07708         | S | Uncharacterized conserved protein                                    | 0   | 0 | 0 | 0 | 0 | 0 | 0 | 0 | 0 | 0 | 0 | 0 | 2 | 0 | 0 |
| arCOG07709         | S | Uncharacterized conserved protein                                    | 0   | 0 | 0 | 0 | 0 | 0 | 0 | 0 | 0 | 0 | 0 | 0 | 2 | 0 | 0 |
| arCOG07710         | S | Cell surface protein                                                 | 0   | 0 | 0 | 0 | 0 | 0 | 0 | 0 | 0 | 0 | 0 | 0 | 2 | 0 | 0 |
| arCOG07711         | S | Uncharacterized conserved protein                                    | 0   | 1 | 0 | 0 | 0 | 0 | 0 | 0 | 0 | 0 | 0 | 0 | 1 | 0 | 0 |
| arCOG07712         | S | Uncharacterized conserved protein                                    | 0   | 1 | 0 | 0 | 0 | 0 | 0 | 0 | 0 | 0 | 0 | 0 | 1 | 0 | 0 |
| arCOG07713         | S | Uncharacterized conserved protein                                    | 0   | 0 | 0 | 0 | 0 | 0 | 0 | 0 | 0 | 0 | 0 | 0 | 2 | 0 | 0 |
| arCOG07714         | S | Uncharacterized conserved protein                                    | 0   | 2 | 0 | 0 | 0 | 0 | 0 | 0 | 0 | 0 | 0 | 0 | 0 | 0 | 0 |
| arCOG07715         | S | Uncharacterized conserved protein                                    | 0</ |   |   |   |   |   |   |   |   |   |   |   |   |   |   |



---

Distribution of arCOG in hyperthermophilic *Crenarchaeota*, *Euryarchaeota*, *Nanoarchaeota* and *C. symbiosum* in *Nitrosopumilales* was referred from Makarova et al. (2007), of *Korarchaeota* was from Elkins et al. (2008), and of *Nitrosopumilus maritimus* in *Nitrosopumilales* and *C. subterraneus* were tentatively assigned in this study.
